# Supplementary material for: The Culture Environment Influences Both Gene Regulation and Phenotypic Heterogeneity in Escherichia coli
Source: Front Microbiol. 2018 Aug 15;9:1739. doi: 10.3389/fmicb.2018.01739 (PMC6104134; doi:10.3389/fmicb.2018.01739)
Supplement: Supplementary file 1 [file Table_1.csv]

b#	JWID	GeneID	GeneName	Transcript reads at t=17h		Log2 fold change t=0/17h		Log2 fold change t=1/17h		Log2 fold change t=2/17h		Log2 fold change t=3/17h		Log2 fold change t=3.5/17h		Log2 fold change t=4/17h		Log2 fold change t=4.5/17h		Log2 fold change t=5/17h		Log2 fold change t=6/17h		Log2 fold change t=7/17h
				Mean	SEM	Mean	SEM	Mean	SEM	Mean	SEM	Mean	SEM	Mean	SEM	Mean	SEM	Mean	SEM	Mean	SEM	Mean	SEM	Mean	SEM
b0001	JW4367	gene0	thrL	144.33	20.28	-2.76	0.60	-0.86	0.15	-0.60	0.21	0.50	0.33	-0.88	0.26	-0.37	0.28	2.11	0.18	0.76	0.35	0.22	0.20	0.45	0.49
b0002	JW0001	gene1	thrA	1544.00	243.52	-0.39	0.49	-0.38	0.10	-0.23	0.11	-0.22	0.19	-1.10	0.16	-3.20	0.36	2.07	0.13	0.38	0.62	-2.27	0.14	-1.23	0.21
b0011	JW0010	gene10	yaaW	4.00	1.15	0.32	0.80	1.36	0.48	-0.93	1.08	-0.82	0.94	-0.06	0.81	0.93	0.70	1.30	0.61	1.00	0.64	0.27	0.63	0.96	0.41
b0104	JW0101	gene100	guaC	139.33	21.31	0.03	0.44	2.35	0.12	2.08	0.14	2.01	0.28	2.49	0.18	2.57	0.23	0.26	0.19	0.41	0.21	0.42	0.16	0.06	0.16
b0987	JW5133	gene1000	gfcA	2.00	1.00	1.48	0.79	2.19	0.67	2.95	0.77	1.46	1.03	1.75	0.85	1.46	0.87	1.51	0.79	0.98	0.82	0.43	0.75	0.28	0.50
-	-	gene1001	insA	1.00	0.58	0.56	0.76	0.56	1.13	-0.48	1.74	0.40	1.34	-0.65	1.69	0.79	1.18	-0.56	1.22	-1.28	0.94	0.10	0.80	-0.62	0.46
b0021	Null	gene1002	insB1	0.67	0.33	-0.26	0.55	0.93	1.13	0.36	1.72	-2.57	2.07	-2.87	2.17	-0.15	1.45	-1.68	1.24	-0.14	0.99	-0.44	0.74	-0.21	0.47
b0989	JW5134	gene1003	cspH	0.00	0.00	3.21	0.80	6.72	1.80	5.33	2.07	4.33	1.87	NA	NA	NA	NA	NA	NA	NA	NA	NA	NA	NA	NA
b0990	JW0974	gene1004	cspG	2.33	1.45	6.55	0.58	7.84	0.74	3.69	0.65	3.70	0.84	1.90	0.81	1.11	0.91	1.25	0.78	1.13	0.76	0.00	0.76	-0.19	0.50
b0991	JW0975	gene1005	ymcE	0.33	0.33	1.67	0.79	4.72	1.22	1.09	1.92	1.04	1.74	0.36	1.90	0.47	1.56	-0.46	1.23	-0.15	0.91	-0.14	0.67	-0.18	0.37
b4517	JW0976	gene1006	gnsA	2.00	1.53	-0.37	0.71	3.54	0.63	4.30	0.67	4.61	0.76	4.40	0.67	4.09	0.67	3.64	0.62	2.83	0.66	1.43	0.68	0.74	0.48
b0992	JW0977	gene1007	yccM	5.67	1.45	-0.05	0.79	-0.83	0.48	-1.93	1.05	-0.50	0.74	1.60	0.55	2.21	0.64	1.90	0.49	1.02	0.56	0.32	0.56	0.12	0.43
b0993	JW5135	gene1008	torS	86.00	13.20	-0.17	0.56	-1.41	0.16	-1.75	0.28	-2.20	0.34	-2.01	0.29	-1.31	0.28	-1.09	0.24	-0.91	0.26	-0.58	0.21	-0.47	0.19
b0994	JW0979	gene1009	torT	46.33	7.13	0.37	0.46	-3.35	0.25	-3.01	0.47	-2.91	0.51	-2.06	0.43	-1.21	0.35	-0.21	0.29	-0.17	0.31	0.07	0.25	-0.03	0.21
b0106	JW0102	gene101	hofC	22.67	4.06	-0.16	0.60	-0.03	0.26	-0.29	0.42	-0.36	0.40	-1.10	0.47	-0.20	0.38	0.02	0.35	-0.17	0.38	-0.32	0.36	-0.28	0.26
b0995	JW0980	gene1010	torR	48.33	5.36	0.46	0.43	-0.72	0.18	0.49	0.26	0.47	0.28	0.39	0.27	0.94	0.28	0.59	0.24	0.25	0.27	0.17	0.25	-0.13	0.22
b0996	JW0981	gene1011	torC	10.67	2.67	-0.79	0.72	-4.59	0.58	-2.53	0.87	-2.83	0.88	-2.40	0.76	-1.11	0.60	-0.26	0.50	-0.34	0.56	-0.02	0.48	-0.27	0.36
b0997	JW0982	gene1012	torA	34.00	5.77	-0.18	0.48	-1.79	0.22	-1.92	0.45	-1.72	0.47	-1.54	0.38	-1.27	0.39	-0.57	0.32	-0.10	0.32	-0.13	0.30	0.09	0.22
b0998	JW0983	gene1013	torD	9.67	1.45	0.73	0.60	-0.32	0.36	-0.61	0.64	-1.41	0.69	-1.01	0.63	0.27	0.52	-0.45	0.54	-0.58	0.55	-0.02	0.48	0.12	0.35
b0999	JW0984	gene1014	cbpM	259.67	66.48	0.09	0.32	-4.33	0.22	-3.85	0.29	-3.93	0.40	-2.47	0.27	-1.13	0.32	0.92	0.20	2.13	0.27	1.78	0.17	1.42	0.23
b1000	JW0985	gene1015	cbpA	2190.67	374.86	-0.81	0.21	-4.87	0.13	-4.16	0.16	-3.88	0.25	-3.05	0.16	-1.81	0.27	0.66	0.14	1.49	0.23	1.11	0.12	0.69	0.21
b1001	JW0986	gene1016	yccE	3.67	1.67	-0.01	0.81	1.81	0.51	0.81	0.80	0.20	0.85	0.38	0.82	-0.19	0.90	0.23	0.75	0.23	0.75	0.47	0.64	-0.23	0.47
b1002	JW0987	gene1017	agp	1635.00	288.90	-1.40	0.21	-7.08	0.13	-6.82	0.26	-2.97	0.75	-1.65	0.17	-0.24	0.17	1.14	0.14	0.70	0.15	0.37	0.11	-0.10	0.20
b1003	JW0988	gene1018	yccJ	1097.00	186.18	-0.88	0.30	-7.60	0.18	-7.85	0.41	-6.52	0.35	-3.32	0.20	-1.17	0.26	1.45	0.14	1.61	0.17	1.06	0.12	0.96	0.17
b1004	JW0989	gene1019	wrbA	2855.67	581.94	-0.40	0.35	-8.65	0.15	-7.78	0.27	-6.97	0.31	-3.12	0.15	-1.01	0.29	1.43	0.12	1.81	0.16	1.20	0.11	0.74	0.15
b0107	JW0103	gene102	hofB	16.33	3.28	1.48	0.58	0.30	0.28	0.04	0.46	0.18	0.49	-0.62	0.49	0.77	0.48	0.39	0.39	-0.17	0.48	0.00	0.40	-0.28	0.33
b4518	JW5136	gene1020	ymdF	41169.00	7782.04	-3.19	0.52	-12.05	0.21	-10.86	0.25	-11.17	0.49	-11.09	0.27	-8.31	0.40	-6.06	0.17	-4.42	0.26	-2.90	0.15	-1.75	0.22
b1006	JW5137	gene1021	rutG	33.33	9.67	0.58	0.53	-1.23	0.29	-2.19	0.51	-1.83	0.51	-2.18	0.47	-1.60	0.47	-0.86	0.35	-0.74	0.38	-0.54	0.34	-0.11	0.26
b1007	JW5138	gene1022	rutF	3.33	1.67	0.36	0.80	-1.53	0.71	-4.83	2.15	-2.84	1.57	-1.27	1.12	-1.27	1.15	-0.43	0.87	-0.23	0.82	0.05	0.69	-0.02	0.48
b1008	JW0993	gene1023	rutE	1.00	0.58	-0.11	0.66	1.04	0.99	-3.04	2.37	-0.36	1.69	0.17	1.46	-1.08	1.54	-0.78	1.25	0.59	0.95	-0.57	0.75	0.24	0.51
b1009	JW0994	gene1024	rutD	3.00	1.00	-0.27	0.80	-0.49	0.67	-1.97	1.42	-1.95	1.25	-1.35	1.13	-1.44	1.10	-0.27	0.85	-0.94	0.89	-0.19	0.74	-0.32	0.48
b1010	JW0995	gene1025	rutC	2.33	0.67	-0.62	0.78	-0.81	0.75	-4.33	2.19	-1.57	1.29	-4.36	2.00	-2.20	1.33	-1.83	1.13	-1.24	0.95	-1.81	0.80	-0.27	0.50
b1011	JW5139	gene1026	rutB	1.33	0.33	-0.63	0.69	0.67	0.91	-1.62	1.75	-3.47	1.97	-2.00	1.67	-1.64	1.43	-1.57	1.21	-0.23	0.96	-0.19	0.80	-0.05	0.51
b1012	JW0997	gene1027	rutA	6.67	1.45	-0.69	0.79	0.18	0.49	-3.87	1.40	-3.07	1.10	-2.85	1.02	-2.20	0.91	-1.05	0.71	-0.65	0.67	-0.61	0.60	-0.54	0.43
b1013	JW0998	gene1028	rutR	79.67	18.84	-0.28	0.40	-0.65	0.18	-0.99	0.29	-0.89	0.35	-1.19	0.28	-0.97	0.34	-0.80	0.25	-0.74	0.31	-0.72	0.24	-0.06	0.25
b1014	JW0999	gene1029	putA	572.33	221.75	0.87	0.81	-5.33	0.59	-1.98	0.57	1.84	0.84	-0.47	0.87	-1.60	0.99	3.79	0.55	3.46	0.55	2.82	0.50	2.58	0.37
b0108	JW0104	gene103	ppdD	1.33	0.67	1.12	0.80	1.70	0.90	-0.79	1.67	-0.82	1.62	-1.78	1.76	-0.78	1.36	-0.95	1.19	-0.58	0.99	-0.80	0.78	-0.49	0.50
b1015	JW1001	gene1030	putP	125.33	29.17	0.61	0.36	1.37	0.13	1.04	0.19	2.40	0.50	-0.67	0.30	-2.42	0.35	2.95	0.19	1.67	0.20	0.42	0.17	0.71	0.21
-	-	gene1031	efeU	42.00	2.08	2.62	0.29	2.43	0.17	2.06	0.22	1.16	0.44	-5.17	0.75	-4.54	0.67	-4.09	0.52	-4.01	0.55	-3.02	0.43	-1.48	0.41
b1018	JW1003	gene1032	efeO	36.00	5.69	1.67	0.44	3.77	0.20	3.65	0.20	2.78	0.46	-1.66	0.39	-2.77	0.48	-2.44	0.42	-1.65	0.40	-1.77	0.38	-1.53	0.26
b1019	JW1004	gene1033	efeB	27.67	6.69	1.09	0.47	3.37	0.24	3.16	0.23	2.10	0.52	-1.42	0.43	-1.43	0.46	-1.36	0.40	-1.50	0.43	-1.16	0.38	-1.08	0.27
b1020	JW1005	gene1034	phoH	547.67	92.67	-0.71	0.50	-4.39	0.18	-5.08	0.27	-3.37	0.62	-7.73	0.51	-6.28	0.41	-0.97	0.19	-0.60	0.24	-1.82	0.18	0.01	0.49
b1021	JW1006	gene1035	pgaD	3.67	0.67	-0.74	0.81	0.41	0.55	1.47	0.71	1.07	0.72	1.29	0.70	1.16	0.67	1.51	0.61	0.78	0.66	1.07	0.59	0.28	0.46
b1022	JW1007	gene1036	pgaC	2.67	0.67	-1.05	0.77	0.79	0.60	0.97	0.91	1.26	0.79	1.99	0.72	0.94	0.86	0.84	0.75	1.48	0.67	1.30	0.62	0.59	0.48
b1023	JW5142	gene1037	pgaB	4.33	1.67	0.10	0.80	1.08	0.49	0.92	0.74	1.52	0.68	1.71	0.65	1.10	0.69	1.29	0.60	0.95	0.63	0.96	0.58	0.58	0.42
b1024	JW1010	gene1038	pgaA	10.67	1.33	0.62	0.74	0.89	0.34	1.45	0.43	1.38	0.50	1.45	0.42	0.60	0.48	1.06	0.42	0.66	0.46	1.37	0.38	1.06	0.34
b1025	JW5143	gene1039	ycdT	6.00	1.53	0.05	0.79	1.34	0.40	1.15	0.60	2.15	0.52	1.76	0.53	1.41	0.55	2.39	0.45	1.60	0.50	0.19	0.56	0.16	0.39
b0109	JW0105	gene104	nadC	98.00	12.42	1.70	0.36	1.13	0.13	0.75	0.18	1.06	0.25	0.87	0.20	0.77	0.21	0.25	0.20	0.14	0.22	0.14	0.18	-0.12	0.17
b0299	Null	gene1040	insF1	1.00	0.58	0.58	0.77	0.55	0.96	-0.03	1.68	0.25	1.47	-0.35	1.49	0.44	1.28	-0.17	1.14	0.00	0.98	0.23	0.80	-0.59	0.47
b0298	Null	gene1041	insE1	0.33	0.33	0.09	0.52	-1.77	1.89	-1.65	2.51	-0.08	2.04	-1.70	2.22	-1.10	1.54	0.61	1.25	-0.07	0.88	-0.08	0.64	-0.37	0.27
-	-	gene1042	ymdE	0.67	0.33	-0.06	0.65	-0.96	1.27	-0.85	2.03	-2.57	2.07	-2.87	2.17	-0.15	1.45	-0.80	1.26	-0.53	0.97	-0.81	0.68	-0.45	0.44
b1029	JW1015	gene1043	ycdU	1.33	0.88	0.30	0.76	2.56	0.76	1.68	1.07	0.87	1.37	-0.42	1.41	-0.94	1.43	-0.25	1.09	-0.03	0.94	-0.69	0.80	-0.03	0.51
b1033	JW5146	gene1045	ghrA	179.67	33.19	-0.15	0.27	-2.09	0.15	-1.62	0.20	-1.06	0.31	-0.09	0.18	0.17	0.31	1.11	0.16	1.26	0.18	0.83	0.15	0.52	0.17
b1034	JW1017	gene1046	ycdX	275.00	45.53	-0.62	0.25	-0.20	0.11	-0.37	0.15	-0.37	0.21	-0.10	0.17	-0.06	0.19	0.07	0.16	0.08	0.18	0.13	0.14	-0.12	0.18
b1035	JW1018	gene1047	ycdY	97.67	16.74	0.27	0.42	0.97	0.12	0.75	0.19	0.55	0.29	1.12	0.19	1.02	0.21	0.39	0.19	0.81	0.21	0.44	0.18	0.38	0.17
b1036	JW5147	gene1048	ycdZ	12.33	3.48	3.32	0.42	3.89	0.25	3.27	0.32	3.90	0.40	3.40	0.32	1.79	0.41	0.59	0.42	0.82	0.43	0.87	0.39	0.88	0.30
b1037	JW1020	gene1049	csgG	14.33	4.91	1.40	0.54	-0.01	0.31	-1.22	0.62	-0.61	0.55	-1.18	0.58	-1.58	0.61	-0.05	0.47	-0.40	0.50	-0.19	0.44	0.09	0.34
b0110	JW0106	gene105	ampD	100.67	18.77	-0.69	0.34	-2.25	0.15	-1.71	0.27	-1.01	0.39	-0.88	0.23	-0.44	0.32	-0.09	0.20	-0.20	0.22	-0.32	0.20	-0.10	0.19
b1038	JW1021	gene1050	csgF	1.67	1.20	0.38	0.80	1.16	0.75	-0.22	1.39	-0.28	1.44	-0.56	1.41	-0.33	1.20	-0.40	1.09	0.33	0.91	-0.50	0.80	0.17	0.51
b1039	JW1022	gene1051	csgE	2.67	0.88	2.66	0.64	1.27	0.58	-2.57	1.63	-0.93	1.16	-4.51	1.98	-3.64	1.55	-0.59	0.93	-0.79	0.89	-0.94	0.79	-0.10	0.51
b1040	JW1023	gene1052	csgD	48.67	8.82	2.14	0.33	-0.53	0.20	-2.66	0.44	-2.40	0.58	-3.15	0.45	-3.97	0.57	-1.38	0.32	-1.68	0.36	-1.05	0.32	-0.57	0.35
b1041	JW1024	gene1053	csgB	0.67	0.33	0.60	0.79	0.17	1.16	-0.96	2.05	0.71	1.49	0.80	1.45	0.35	1.40	1.76	1.03	0.72	0.98	-0.44	0.74	0.96	0.51
b1042	JW1025	gene1054	csgA	15.67	5.55	-1.32	0.74	-3.08	0.40	-2.19	0.69	-2.41	0.75	-1.21	0.61	-0.61	0.52	0.59	0.39	0.46	0.42	0.10	0.41	-0.23	0.32
b1043	JW1026	gene1055	csgC	1.00	0.58	-0.01	0.71	0.52	0.96	-0.46	1.67	0.60	1.32	-0.39	1.53	-1.28	1.52	-1.22	1.24	-0.01	0.98	0.00	0.80	-0.08	0.50
b1044	JW1031	gene1056	ymdA	1.33	1.33	0.23	0.72	2.35	0.77	1.76	1.17	1.92	1.13	1.26	1.18	1.29	1.16	0.47	1.07	0.70	0.93	0.45	0.79	0.14	0.50
b1045	JW1032	gene1057	ymdB	82.67	16.51	0.19	0.32	-2.95	0.18	-3.29	0.39	-3.02	0.39	-1.90	0.29	-1.04	0.30	0.48	0.20	0.73	0.22	0.38	0.19	0.35	0.19
b1046	JW5150	gene1058	clsC	243.00	49.12	-0.13	0.29	-2.79	0.18	-3.49	0.26	-3.02	0.32	-3.04	0.25	-2.03	0.36	-0.69	0.18	-0.32	0.22	-0.22	0.16	-0.08	0.18
b1047	JW1034	gene1059	opgC	8.33	1.67	2.23	0.57	5.52	0.31	5.07	0.33	3.83	0.64	2.37	0.42	0.43	0.66	-1.52	0.68	-1.28	0.67	0.02	0.52	-0.48	0.43
b0111	JW0107	gene106	ampE	208.67	46.42	-1.49	0.36	-2.41	0.15	-2.13	0.22	-1.34	0.32	-1.22	0.20	-1.01	0.30	-0.46	0.18	-0.61	0.21	-0.58	0.17	-0.39	0.17
b1048	JW1035	gene1060	opgG	1436.67	242.23	-0.70	0.19	0.40	0.10	0.61	0.10	0.09	0.27	-0.08	0.13	-0.08	0.24	-0.57	0.13	-0.25	0.20	-0.05	0.11	-0.29	0.14
b1049	JW1037	gene1061	opgH	912.67	149.37	-0.19	0.20	0.88	0.10	0.99	0.11	0.24	0.35	0.18	0.16	0.22	0.19	-1.19	0.15	-0.46	0.23	0.08	0.12	0.05	0.15
b1050	JW5151	gene1062	yceK	2.67	0.88	1.04	0.80	2.36	0.55	2.56	0.71	1.88	0.75	0.08	1.05	1.40	0.74	-0.04	0.87	0.15	0.81	0.52	0.69	0.50	0.48
b1051	JW1039	gene1063	msyB	3120.67	602.38	-1.48	0.45	-7.60	0.17	-7.92	0.28	-6.97	0.33	-5.58	0.23	-2.90	0.36	-0.45	0.15	0.04	0.19	0.11	0.14	0.38	0.18
b1053	JW1040	gene1064	mdtG	68.00	8.72	0.23	0.43	-1.80	0.17	-1.30	0.29	-2.24	0.37	-2.19	0.32	-0.82	0.28	-1.13	0.26	-0.69	0.26	-0.19	0.22	-0.28	0.19
b1054	JW1041	gene1065	lpxL	102.67	14.86	0.62	0.37	1.33	0.13	2.06	0.16	1.41	0.42	1.12	0.19	1.18	0.21	0.10	0.19	0.45	0.21	0.59	0.18	0.31	0.17
b1055	JW1042	gene1066	yceA	37.67	7.84	2.05	0.36	4.78	0.16	4.37	0.18	3.45	0.61	0.40	0.29	-0.26	0.32	-0.70	0.31	-0.39	0.33	0.24	0.27	0.13	0.22
b1056	JW1043	gene1067	yceI	57.00	12.86	-1.50	0.61	-0.41	0.17	-0.27	0.29	-0.21	0.36	-0.48	0.30	-2.06	0.43	-1.65	0.31	-0.55	0.32	0.10	0.24	0.25	0.21
b1057	JW1044	gene1068	yceJ	4.33	0.33	0.63	0.79	0.19	0.50	0.42	0.78	-0.02	0.82	-0.05	0.78	-1.40	0.91	-0.84	0.78	-0.65	0.79	0.29	0.62	0.98	0.40
b1058	JW1045	gene1069	yceO	0.33	0.33	-0.12	0.49	0.36	1.59	0.87	2.04	1.49	1.73	0.47	1.95	1.07	1.53	-0.15	1.24	-0.49	0.71	-0.38	0.51	-0.37	0.27
b0112	JW0108	gene107	aroP	84.67	8.37	0.86	0.33	2.04	0.12	1.40	0.18	1.07	0.25	-0.70	0.24	-1.01	0.42	0.49	0.20	0.41	0.23	0.08	0.20	0.05	0.19
b1059	JW1046	gene1070	solA	100.33	18.48	0.26	0.30	0.65	0.13	1.46	0.16	1.42	0.22	1.73	0.18	1.21	0.22	0.61	0.20	0.82	0.20	0.69	0.17	0.30	0.18
b1060	JW5152	gene1071	bssS	545.00	95.79	-2.08	0.40	-1.89	0.18	-1.66	0.19	-1.27	0.35	-1.92	0.25	-1.09	0.26	1.55	0.16	1.47	0.29	0.39	0.17	-0.15	0.20
b1061	JW1048	gene1072	dinI	5.00	1.00	0.59	0.76	4.70	0.40	4.13	0.44	3.83	0.61	3.22	0.47	3.48	0.50	2.60	0.47	1.89	0.52	1.58	0.49	1.29	0.38
b1062	JW1049	gene1073	pyrC	60.33	9.33	1.49	0.45	2.65	0.13	3.15	0.16	2.26	0.50	1.99	0.21	2.78	0.30	-0.57	0.25	0.32	0.31	0.97	0.20	0.22	0.19
b1063	JW1050	gene1074	yceB	98.33	15.19	0.87	0.50	0.38	0.14	0.15	0.20	0.17	0.28	0.13	0.21	0.30	0.23	0.79	0.19	0.92	0.23	1.09	0.18	0.53	0.22
b1064	JW1051	gene1075	grxB	5234.67	890.79	-3.18	0.28	-6.53	0.12	-5.32	0.14	-4.60	0.22	-3.71	0.17	-2.55	0.28	-0.72	0.14	-0.09	0.19	0.27	0.12	-0.02	0.22
b1065	JW1052	gene1076	mdtH	15.00	3.46	1.54	0.56	0.13	0.35	-1.08	0.56	-1.37	0.56	-1.49	0.56	-0.62	0.48	0.19	0.41	-0.02	0.43	-0.17	0.42	-0.59	0.31
b1066	JW1053	gene1077	rimJ	272.00	42.32	-0.74	0.31	-1.18	0.14	-1.21	0.19	-0.55	0.37	-0.31	0.20	-0.16	0.23	0.19	0.17	-0.15	0.19	-0.32	0.15	-0.56	0.19
b1067	JW1054	gene1078	yceH	155.33	20.61	-0.78	0.29	-0.68	0.13	-1.03	0.19	-0.65	0.31	-0.15	0.19	0.02	0.22	0.72	0.17	0.50	0.20	0.08	0.16	0.08	0.15
b1068	JW1055	gene1079	yceM	118.00	21.93	-0.14	0.30	-0.75	0.13	-1.16	0.22	-0.68	0.31	0.14	0.20	0.07	0.25	0.60	0.18	0.59	0.20	0.39	0.19	0.12	0.17
b0113	JW0109	gene108	pdhR	200.67	32.75	2.24	0.47	3.27	0.12	3.77	0.12	2.24	1.02	-0.78	0.28	1.45	0.49	0.81	0.17	0.54	0.19	0.67	0.16	-0.20	0.22
b1069	JW1056	gene1080	murJ	58.33	10.73	0.96	0.51	2.54	0.14	2.12	0.19	1.22	0.46	0.90	0.23	-0.12	0.38	-1.73	0.30	-1.16	0.33	-0.40	0.25	-0.26	0.21
b1070	JW1057	gene1081	flgN	12.67	3.48	0.24	0.72	-0.09	0.34	-0.11	0.54	0.35	0.51	-0.06	0.50	-0.29	0.56	-0.18	0.49	-0.27	0.50	-0.28	0.46	-0.17	0.34
b1071	JW1058	gene1082	flgM	8.00	2.08	0.79	0.67	-0.69	0.41	-1.17	0.79	-0.34	0.67	0.51	0.56	0.75	0.52	0.62	0.51	0.41	0.54	0.69	0.48	0.33	0.36
b1072	JW1059	gene1083	flgA	11.00	4.00	0.00	0.67	-0.52	0.36	-0.37	0.61	0.67	0.51	1.27	0.48	0.44	0.49	-0.20	0.53	-0.10	0.54	0.44	0.44	0.36	0.33
b1073	JW1060	gene1084	flgB	0.00	0.00	NA	NA	4.78	1.97	6.39	1.97	7.09	1.59	8.04	1.61	6.46	1.31	1.56	1.25	0.43	0.70	0.30	0.49	0.27	0.33
b1074	JW1061	gene1085	flgC	0.67	0.67	0.28	0.63	1.72	1.11	2.65	1.29	4.37	1.04	4.75	0.99	3.97	0.96	1.00	1.14	-0.03	0.98	0.22	0.78	0.17	0.49
b1075	JW1062	gene1086	flgD	4.67	2.03	0.10	0.78	0.42	0.55	2.03	0.61	3.09	0.72	4.21	0.47	3.13	0.54	-0.68	0.79	-0.64	0.76	-0.44	0.67	-0.28	0.45
b1076	JW1063	gene1087	flgE	25.00	4.04	-0.31	0.55	-0.86	0.27	0.89	0.34	1.58	0.54	2.73	0.28	1.67	0.36	-1.05	0.48	-1.53	0.46	-1.14	0.40	-1.00	0.30
b1077	JW1064	gene1088	flgF	3.00	1.73	1.37	0.77	0.39	0.62	1.69	0.80	2.34	0.73	3.74	0.63	2.45	0.66	-0.31	0.91	0.32	0.80	0.84	0.66	0.49	0.47
b1078	JW1065	gene1089	flgG	16.00	3.79	0.15	0.56	-1.03	0.30	0.48	0.42	1.10	0.43	2.49	0.31	1.21	0.38	-0.52	0.44	-0.73	0.47	-0.09	0.42	-0.17	0.33
b0114	JW0110	gene109	aceE	5475.33	930.96	-0.41	0.21	2.46	0.09	3.00	0.09	1.30	0.75	-0.44	0.24	1.62	0.57	0.21	0.13	0.05	0.16	0.02	0.10	-0.38	0.21
b1079	JW5153	gene1090	flgH	2.67	1.67	0.92	0.79	0.47	0.66	1.31	0.89	1.11	0.87	2.89	0.66	1.67	0.77	-0.74	0.98	0.14	0.84	-0.25	0.76	0.64	0.47
b1080	JW1067	gene1091	flgI	7.00	2.52	1.05	0.66	-0.39	0.44	-0.04	0.69	0.58	0.63	1.49	0.51	0.57	0.59	-1.57	0.76	-0.62	0.67	-0.13	0.57	-0.15	0.39
b1081	JW1068	gene1092	flgJ	5.00	0.00	-0.41	0.77	-0.54	0.49	0.21	0.81	0.46	0.75	1.33	0.61	0.82	0.60	-0.56	0.72	-0.07	0.68	0.23	0.59	-0.41	0.43
b1082	JW1069	gene1093	flgK	41.67	8.95	0.18	0.48	-2.04	0.22	-1.68	0.40	-1.39	0.39	-0.77	0.33	-1.24	0.36	-0.30	0.28	-0.61	0.32	-0.44	0.29	-0.05	0.23
b1083	JW1070	gene1094	flgL	61.00	8.02	-0.14	0.37	-2.38	0.19	-2.07	0.35	-1.86	0.36	-0.74	0.29	-0.98	0.32	-0.11	0.25	-0.49	0.30	-0.38	0.24	-0.14	0.22
b1084	JW1071	gene1095	rne	1595.00	313.93	0.08	0.18	0.70	0.11	1.18	0.11	0.80	0.19	0.78	0.17	0.40	0.18	0.27	0.13	0.52	0.19	0.40	0.11	-0.05	0.15
b1085	JW5154	gene1096	yceQ	0.00	0.00	NA	NA	1.01	2.31	1.72	2.51	2.12	2.10	NA	NA	NA	NA	1.51	1.24	NA	NA	0.60	0.63	0.25	0.31
b1086	JW1072	gene1097	rluC	84.33	11.67	1.21	0.36	3.65	0.12	2.97	0.15	2.40	0.39	1.59	0.19	0.64	0.32	-0.76	0.24	-0.37	0.25	0.17	0.20	0.09	0.18
b1087	JW5155	gene1098	yceF	470.67	90.40	-0.52	0.30	-2.36	0.14	-2.47	0.18	-2.43	0.29	-1.88	0.19	-0.69	0.22	-0.52	0.16	-0.17	0.23	0.11	0.14	0.26	0.17
b0013	JW0012	gene11	yaaI	0.33	0.33	0.57	0.70	2.39	1.38	1.91	1.80	2.54	1.47	0.96	1.85	1.92	1.37	0.43	1.26	-0.07	0.88	0.16	0.70	0.01	0.42
b0115	JW0111	gene110	aceF	2230.67	384.29	0.17	0.21	2.73	0.09	2.85	0.10	1.35	0.70	-0.08	0.26	1.67	0.57	0.44	0.13	0.30	0.16	0.12	0.11	-0.07	0.18
b1088	JW1074	gene1100	yceD	2281.00	289.47	-0.89	0.25	2.82	0.09	2.56	0.09	1.79	0.40	1.07	0.13	0.88	0.31	-1.14	0.12	-1.10	0.17	-0.32	0.11	-0.40	0.14
b1089	JW1075	gene1101	rpmF	965.00	100.42	-1.74	0.23	1.69	0.10	2.65	0.10	2.21	0.45	1.46	0.16	1.65	0.29	-0.48	0.14	-0.56	0.21	0.10	0.12	-0.19	0.16
b1090	JW5156	gene1102	plsX	489.33	68.39	-0.64	0.25	1.92	0.09	1.36	0.12	0.75	0.42	0.41	0.15	0.30	0.19	-1.11	0.15	-0.67	0.16	-0.15	0.12	-0.01	0.14
b1091	JW1077	gene1103	fabH	600.33	129.73	0.22	0.27	1.58	0.11	0.75	0.13	0.58	0.45	0.18	0.19	-0.34	0.19	-1.12	0.15	-0.56	0.17	-0.37	0.13	0.04	0.17
b1092	JW1078	gene1104	fabD	557.67	116.69	0.25	0.32	1.82	0.11	1.42	0.13	1.08	0.34	1.14	0.22	1.14	0.20	-0.32	0.15	0.38	0.19	0.39	0.13	0.45	0.16
b1093	JW1079	gene1105	fabG	1119.00	182.32	0.61	0.22	1.91	0.07	1.28	0.10	1.07	0.27	1.01	0.19	0.90	0.18	0.07	0.13	0.44	0.20	0.78	0.10	0.89	0.13
b1094	JW1080	gene1106	acpP	3884.33	486.99	-1.06	0.21	1.89	0.12	1.25	0.10	0.89	0.24	0.53	0.15	0.61	0.23	0.09	0.13	-0.14	0.16	0.08	0.10	0.22	0.15
b1095	JW1081	gene1107	fabF	1135.33	152.33	0.18	0.18	2.34	0.08	2.38	0.10	1.91	0.28	1.61	0.15	1.31	0.23	-0.77	0.13	-0.42	0.19	0.02	0.11	-0.05	0.15
b1096	JW1082	gene1108	pabC	78.67	7.97	0.15	0.35	0.48	0.14	-0.53	0.25	-0.60	0.37	-1.16	0.26	-1.63	0.31	-1.14	0.25	-1.23	0.27	-0.33	0.23	-0.14	0.20
b1097	JW1083	gene1109	yceG	93.67	16.58	0.06	0.35	1.03	0.13	0.53	0.19	0.01	0.38	-1.15	0.25	-1.16	0.28	-1.29	0.23	-1.11	0.25	-0.46	0.21	-0.47	0.18
b0116	JW0112	gene111	lpd	2169.00	416.76	-0.22	0.19	2.05	0.09	2.58	0.11	1.86	0.34	0.75	0.20	1.71	0.48	1.42	0.14	1.07	0.15	0.40	0.11	0.09	0.16
b1098	JW1084	gene1110	tmk	105.00	17.93	-0.03	0.30	0.68	0.12	0.66	0.19	0.21	0.34	-0.25	0.21	-0.85	0.24	-0.80	0.21	-0.59	0.24	-0.19	0.19	-0.26	0.16
b1099	JW1085	gene1111	holB	92.00	18.15	0.01	0.31	1.23	0.13	1.14	0.18	0.55	0.39	0.38	0.21	-0.33	0.27	-0.88	0.23	-0.49	0.24	-0.05	0.20	0.01	0.18
b1100	JW1086	gene1112	ycfH	990.33	141.40	-0.28	0.38	-1.28	0.10	-1.28	0.12	-1.94	0.34	-2.53	0.16	-2.57	0.28	-0.59	0.13	-0.54	0.16	-0.38	0.11	-0.33	0.14
b1101	JW1087	gene1113	ptsG	1176.67	179.14	0.16	0.28	2.01	0.07	2.33	0.09	3.28	0.39	0.07	0.14	0.91	0.17	-0.76	0.13	-0.48	0.20	-0.39	0.11	-0.28	0.14
b1102	JW1088	gene1114	fhuE	280.33	50.70	0.46	0.42	-2.57	0.19	-1.79	0.20	-2.86	0.55	-4.54	0.30	-3.98	0.31	-4.05	0.25	-4.24	0.31	-4.07	0.25	-3.78	0.20
b1103	JW1089	gene1115	hinT	495.33	75.55	-1.29	0.26	-2.08	0.10	-1.24	0.14	-0.95	0.24	-0.71	0.18	-0.26	0.25	0.49	0.14	0.57	0.17	0.31	0.12	0.00	0.15
b1104	JW1090	gene1116	ycfL	256.33	40.37	-1.31	0.30	-1.51	0.11	-1.07	0.17	-0.88	0.26	-0.53	0.18	-0.11	0.29	0.61	0.15	0.69	0.19	0.38	0.14	0.27	0.16
b1105	JW5157	gene1117	lpoB	311.67	70.44	0.08	0.32	-1.92	0.18	-1.01	0.19	-1.04	0.30	-0.25	0.22	0.12	0.34	0.74	0.17	1.37	0.23	1.10	0.16	0.78	0.21
b1106	JW1092	gene1118	thiK	86.33	16.19	-0.02	0.33	-0.33	0.16	-0.17	0.23	-0.15	0.26	-0.13	0.24	-0.10	0.28	-0.14	0.21	0.33	0.23	0.53	0.19	0.24	0.18
b1107	JW1093	gene1119	nagZ	297.00	47.84	-0.31	0.25	-0.33	0.10	-0.48	0.15	-0.36	0.25	-0.24	0.17	-0.47	0.24	-0.15	0.16	0.09	0.17	-0.04	0.14	0.12	0.15
b0117	JW0113	gene112	yacH	28.67	6.77	0.55	0.49	-3.27	0.31	-3.88	0.73	-3.32	0.64	-3.48	0.60	-1.72	0.56	-0.46	0.35	-0.60	0.37	-0.84	0.37	-0.67	0.26
b1108	JW5158	gene1120	ycfP	649.33	113.81	-0.79	0.25	-1.48	0.11	-1.68	0.14	-1.55	0.26	-0.42	0.16	-0.69	0.18	0.55	0.17	0.36	0.16	0.02	0.12	0.07	0.14
b1109	JW1095	gene1121	ndh	157.33	32.21	1.74	0.34	3.94	0.13	3.89	0.14	2.41	1.08	0.75	0.21	2.33	0.55	-0.47	0.19	-0.01	0.20	0.08	0.17	0.16	0.18
b1110	JW1096	gene1122	ycfJ	40.33	5.81	1.75	0.45	1.84	0.17	0.25	0.30	-1.27	1.17	-4.16	0.59	-2.77	0.46	-2.57	0.39	-2.60	0.43	-2.44	0.39	-0.60	0.39
b1111	JW5159	gene1123	ycfQ	235.67	35.57	-0.47	0.27	-1.66	0.12	-1.22	0.17	-1.50	0.24	-1.59	0.20	-0.74	0.23	-0.70	0.16	-0.80	0.19	-0.45	0.15	-0.58	0.16
b1112	JW1098	gene1124	bhsA	109.00	18.03	-1.01	0.45	-0.79	0.16	0.13	0.21	-1.37	1.01	-3.75	0.37	-3.64	0.42	-0.46	0.22	0.15	0.27	-0.34	0.20	0.36	0.22
b1113	JW5820	gene1125	ldtC	241.00	50.40	-1.20	0.34	-2.67	0.16	-2.07	0.21	-2.22	0.33	-1.78	0.22	-2.78	0.29	-4.28	0.27	-1.89	0.37	-0.86	0.17	-0.38	0.26
b1114	JW1100	gene1126	mfd	935.00	198.19	-0.12	0.22	-0.95	0.15	-0.72	0.14	-0.24	0.36	-0.23	0.17	-0.34	0.21	-1.08	0.16	-0.44	0.21	0.38	0.13	0.14	0.19
b1115	JW1101	gene1127	ycfT	5.67	0.33	0.48	0.69	-1.28	0.54	-1.16	0.92	-1.10	0.84	-2.34	1.04	-1.48	0.85	-1.45	0.77	-1.55	0.79	-0.45	0.62	-0.99	0.44
b1116	JW5161	gene1128	lolC	161.33	33.39	0.14	0.50	0.86	0.12	0.87	0.16	0.45	0.31	0.13	0.20	-0.23	0.21	-1.73	0.22	-0.76	0.25	0.04	0.16	-0.13	0.17
b1117	JW5162	gene1129	lolD	101.00	13.01	-0.75	0.37	0.35	0.15	0.35	0.20	0.17	0.31	-0.05	0.22	0.09	0.23	-1.34	0.23	-0.55	0.26	0.06	0.19	-0.08	0.18
b0118	JW0114	gene113	acnB	6135.00	1226.41	-0.73	0.19	-1.89	0.13	-1.22	0.12	0.02	0.44	-0.90	0.21	-0.70	0.36	1.23	0.15	0.89	0.17	-0.28	0.12	-0.35	0.19
b1118	JW1104	gene1130	lolE	358.67	45.89	-1.38	0.29	-0.27	0.09	-0.39	0.14	-0.50	0.24	-0.64	0.17	-0.52	0.18	-0.63	0.15	-0.61	0.17	-0.24	0.14	-0.22	0.17
b1119	JW1105	gene1131	nagK	211.67	42.60	0.21	0.28	-0.49	0.12	-0.48	0.17	-0.67	0.22	-0.28	0.19	0.24	0.20	0.18	0.16	0.18	0.18	0.50	0.14	0.18	0.17
b1120	JW1106	gene1132	cobB	116.33	26.43	-0.03	0.30	0.19	0.14	0.03	0.20	0.38	0.27	0.90	0.20	1.45	0.23	0.71	0.19	0.85	0.23	0.79	0.17	0.38	0.20
b1121	JW1107	gene1133	ycfZ	0.00	0.00	NA	NA	6.76	1.80	6.11	1.99	5.50	1.73	3.22	2.09	2.46	1.64	0.65	1.05	NA	NA	0.76	0.68	0.51	0.41
b1122	JW5164	gene1134	ymfA	0.00	0.00	NA	NA	7.44	1.74	6.73	1.93	5.49	1.73	3.69	2.04	2.76	1.62	0.65	1.05	0.49	0.72	0.51	0.59	0.64	0.44
b1123	JW1109	gene1135	potD	431.67	74.60	-0.59	0.24	1.27	0.10	1.78	0.11	1.23	0.43	1.28	0.15	1.38	0.24	0.10	0.17	0.26	0.23	0.93	0.12	0.36	0.18
b1124	JW1110	gene1136	potC	71.33	12.78	-0.80	0.41	1.77	0.14	1.65	0.19	1.02	0.54	0.31	0.24	-0.15	0.40	-1.81	0.29	-1.30	0.29	-0.26	0.23	-0.06	0.20
b1125	JW1111	gene1137	potB	44.33	10.90	-1.20	0.49	2.17	0.16	2.38	0.21	1.69	0.49	1.19	0.27	0.18	0.45	-1.78	0.35	-1.16	0.37	-0.34	0.27	-0.10	0.23
b1126	JW1112	gene1138	potA	216.33	38.62	-0.25	0.35	1.94	0.10	2.63	0.14	1.73	0.52	0.95	0.16	-0.47	0.44	-1.49	0.18	-0.82	0.23	0.04	0.15	-0.23	0.17
b1127	JW1113	gene1139	pepT	1424.33	231.69	-1.40	0.36	-4.23	0.12	-4.29	0.17	-3.32	0.38	-0.16	0.19	0.02	0.32	0.67	0.16	0.39	0.17	-0.03	0.12	-0.20	0.17
b0119	JW0115	gene114	yacL	162.00	33.25	-0.03	0.32	-0.19	0.14	-1.14	0.22	-1.19	0.30	-1.34	0.23	-0.82	0.26	-0.05	0.18	-0.29	0.27	-0.61	0.18	-0.03	0.20
b1128	JW1114	gene1140	roxA	947.00	139.45	0.03	0.19	-0.87	0.07	-1.34	0.11	-1.72	0.29	-1.68	0.14	-1.08	0.17	-0.93	0.13	-0.72	0.15	-0.53	0.11	-0.15	0.12
b1129	JW1115	gene1141	phoQ	205.67	25.30	0.20	0.24	0.00	0.12	0.68	0.14	0.61	0.20	0.06	0.17	-0.21	0.21	0.45	0.16	0.76	0.18	0.50	0.14	0.27	0.16
b1130	JW1116	gene1142	phoP	269.33	50.00	-0.37	0.31	-0.58	0.13	-0.09	0.16	0.25	0.23	0.07	0.19	0.02	0.21	1.20	0.17	1.23	0.18	0.42	0.14	0.34	0.16
b1131	JW1117	gene1143	purB	397.00	52.94	-0.46	0.34	1.76	0.10	2.49	0.11	1.65	0.45	1.08	0.15	1.33	0.26	-1.74	0.16	-0.96	0.27	0.01	0.13	-0.43	0.17
b1132	JW5165	gene1144	hflD	107.33	23.05	0.81	0.35	1.44	0.17	1.41	0.19	0.65	0.45	0.84	0.29	0.84	0.35	-1.12	0.27	-0.14	0.31	0.72	0.18	0.22	0.23
b1133	JW1119	gene1145	mnmA	528.33	91.25	0.45	0.38	1.06	0.09	1.15	0.12	0.46	0.46	-0.07	0.15	-0.52	0.32	-1.87	0.15	-1.14	0.20	-0.16	0.12	-0.16	0.14
b1134	JW1120	gene1146	nudJ	46.33	6.49	1.06	0.35	0.84	0.17	0.12	0.29	-0.33	0.36	-0.30	0.30	-0.05	0.30	-0.79	0.29	-0.36	0.33	0.32	0.25	0.35	0.24
b1135	JW1121	gene1147	rluE	101.33	20.95	0.72	0.34	0.26	0.15	-0.29	0.21	-0.77	0.32	-0.77	0.24	-0.55	0.24	-0.94	0.22	-0.60	0.27	0.05	0.19	0.02	0.18
b1136	JW1122	gene1148	icd	5490.67	1054.53	-0.95	0.26	-2.36	0.14	-1.10	0.11	-0.10	0.27	-0.86	0.18	-0.86	0.30	1.21	0.15	0.74	0.16	0.33	0.11	-0.02	0.15
b1137	JW1123	gene1149	ymfD	6.67	2.33	-0.43	0.77	2.06	0.45	1.44	0.58	2.21	0.69	2.31	0.47	2.42	0.50	1.74	0.48	1.09	0.52	0.96	0.50	0.29	0.44
b0120	JW0116	gene115	speD	423.67	63.83	-1.07	0.23	0.70	0.08	1.92	0.11	1.51	0.32	0.21	0.17	-1.15	0.18	-0.86	0.16	-0.76	0.17	0.05	0.12	-0.29	0.26
b1138	JW5166	gene1150	ymfE	25.67	7.31	-2.73	0.73	-1.67	0.34	-0.62	0.44	0.71	0.54	1.19	0.33	2.03	0.34	2.14	0.27	1.35	0.34	1.34	0.30	0.56	0.38
b1139	JW1125	gene1151	lit	67.67	5.46	-2.98	0.54	-0.83	0.22	-0.96	0.28	-0.58	0.30	-0.70	0.27	0.47	0.25	0.99	0.20	1.27	0.23	1.16	0.19	0.87	0.27
b1140	JW1126	gene1152	intE	5.67	1.86	-0.31	0.78	1.59	0.41	0.46	0.70	0.76	0.80	0.58	0.68	1.36	0.64	2.57	0.46	2.19	0.50	2.00	0.45	1.43	0.38
b1141	JW1127	gene1153	xisE	0.33	0.33	0.13	0.51	2.50	1.34	2.19	1.81	1.70	1.61	1.14	1.94	3.50	1.18	3.46	1.01	3.21	0.87	2.82	0.74	1.42	0.51
b1143	JW5168	gene1154	ymfI	17.67	1.20	0.87	0.53	1.79	0.28	1.36	0.34	1.79	0.35	2.22	0.32	2.55	0.32	1.83	0.31	1.52	0.33	1.47	0.31	0.98	0.29
b1144	Null	gene1155	ymfJ	7.67	2.03	-0.81	0.78	0.51	0.38	-0.63	0.73	-0.29	0.73	0.34	0.60	1.56	0.48	2.27	0.41	1.92	0.45	1.47	0.45	0.91	0.34
b1145	JW1131	gene1156	cohE	71.33	13.54	0.21	0.39	2.09	0.14	1.69	0.18	1.70	0.29	1.36	0.21	1.11	0.28	1.37	0.20	0.71	0.26	0.57	0.20	0.26	0.19
b1146	JW5169	gene1157	croE	0.33	0.33	-0.15	0.50	1.60	1.37	-1.92	2.50	-0.25	2.02	0.87	1.81	4.05	1.13	3.17	1.01	2.38	0.91	1.22	0.80	0.52	0.49
b1147	JW1133	gene1158	ymfL	1.00	0.00	0.67	0.80	0.49	0.95	-1.28	1.88	1.73	1.08	2.20	1.05	3.55	0.87	3.68	0.76	2.90	0.75	2.31	0.69	1.69	0.48
b1148	JW1134	gene1159	ymfM	2.33	0.88	-0.63	0.78	-0.71	0.72	-0.70	1.24	-1.12	1.18	-2.65	1.55	-0.01	1.07	0.84	0.80	0.34	0.81	0.29	0.73	0.17	0.49
b0121	JW0117	gene116	speE	567.00	99.23	-0.54	0.23	0.41	0.08	1.55	0.11	1.09	0.36	-0.01	0.21	-1.25	0.17	-0.95	0.14	-0.78	0.17	-0.09	0.12	-0.31	0.21
-	-	gene1160	oweE	0.00	0.00	NA	NA	2.11	2.14	NA	NA	2.12	2.10	2.11	2.22	2.67	1.63	2.24	1.26	1.92	0.99	1.32	0.77	0.70	0.45
-	-	gene1161	aaaE	8.00	2.08	0.83	0.65	-1.45	0.56	-1.09	0.76	-1.48	0.97	-1.90	0.80	-0.37	0.66	-0.32	0.58	-0.08	0.58	-0.02	0.53	-0.19	0.39
b1150	JW1136	gene1162	ymfR	0.00	0.00	NA	NA	0.00	2.35	NA	NA	NA	NA	2.21	2.20	NA	NA	0.48	1.01	NA	NA	NA	NA	0.12	0.25
-	-	gene1163	beeE	1.67	0.33	-0.17	0.77	-1.06	0.89	-0.39	1.45	-1.93	1.54	-3.96	2.05	-0.70	1.20	-0.32	1.03	0.94	0.85	0.15	0.78	0.41	0.50
-	-	gene1164	jayE	3.33	0.88	1.08	0.73	-1.27	0.72	-4.92	2.12	-1.34	1.06	-1.99	1.18	-0.64	0.92	-1.31	0.94	-0.76	0.83	-0.18	0.70	-0.02	0.48
b1153	JW1139	gene1165	ymfQ	0.33	0.33	-0.15	0.50	0.30	1.51	-0.26	2.28	-1.58	2.07	-2.00	2.23	0.46	1.61	0.94	1.23	-0.17	0.90	0.14	0.72	0.19	0.46
b1154	JW1140	gene1166	stfP	1.00	0.00	0.06	0.74	-0.07	1.02	-3.30	2.31	-1.30	1.65	-3.36	2.12	-1.19	1.47	-0.26	1.16	0.15	0.96	-0.69	0.77	-0.31	0.49
b1155	JW5171	gene1167	tfaP	0.67	0.33	-0.21	0.51	2.53	1.05	1.56	1.49	0.89	1.42	-0.86	1.93	1.45	1.23	1.84	1.03	0.43	0.99	1.05	0.79	0.83	0.51
b1156	JW1142	gene1168	tfaE	3.00	1.00	-0.55	0.79	-1.21	0.74	-0.89	1.20	-0.29	0.97	0.26	0.90	0.28	0.89	1.38	0.68	1.09	0.71	0.38	0.68	-0.07	0.48
-	-	gene1169	stfE	0.33	0.33	0.51	0.70	1.48	1.39	-1.92	2.50	-1.58	2.07	-2.00	2.23	-1.31	1.59	-0.46	1.23	0.44	0.98	-0.14	0.67	-0.03	0.41
b0122	JW0118	gene117	yacC	39.67	1.76	3.11	0.43	2.03	0.19	1.76	0.23	1.81	0.30	0.76	0.33	0.57	0.29	-0.17	0.29	-0.88	0.34	0.30	0.27	-0.13	0.26
b1158	JW1144	gene1170	pinE	0.00	0.00	0.43	0.52	4.58	1.98	4.09	2.24	2.85	2.04	2.73	2.18	2.37	1.65	1.11	1.18	NA	NA	NA	NA	0.16	0.27
b1159	JW1145	gene1171	mcrA	3.33	1.45	1.88	0.68	4.67	0.46	2.83	0.63	3.71	0.61	2.31	0.67	2.29	0.63	1.76	0.62	1.12	0.68	1.14	0.60	0.44	0.46
-	-	gene1172	icdC	0.67	0.33	-0.26	0.55	3.68	0.96	3.12	1.19	2.79	1.11	0.15	1.62	0.69	1.37	-0.99	1.26	-0.14	0.99	-0.44	0.74	0.18	0.50
b1160	JW1147	gene1173	iraM	0.00	0.00	0.36	0.49	5.74	1.88	6.70	1.94	6.38	1.65	5.99	1.79	3.03	1.60	0.65	1.05	0.41	0.69	0.60	0.63	0.25	0.31
b1161	JW1148	gene1174	ycgX	0.00	0.00	0.45	0.53	7.51	1.74	7.34	1.88	6.81	1.63	5.85	1.80	3.45	1.56	1.74	1.25	NA	NA	0.81	0.69	0.12	0.25
b1162	JW1149	gene1175	bluR	100.33	19.65	1.34	0.33	1.02	0.17	0.43	0.21	0.51	0.28	0.16	0.23	0.41	0.26	1.23	0.19	0.89	0.25	0.36	0.20	-0.06	0.20
b1163	JW1150	gene1176	bluF	15.33	1.67	2.43	0.49	1.76	0.25	-0.07	0.47	0.55	0.45	-0.87	0.50	-1.02	0.59	-0.06	0.42	0.47	0.41	0.01	0.40	0.11	0.35
b1164	JW1151	gene1177	ycgZ	556.33	108.98	-1.01	0.41	-4.24	0.18	-5.89	0.52	-5.17	0.40	-8.07	0.56	-7.55	0.54	-2.51	0.21	-3.02	0.27	-2.93	0.18	-0.65	0.49
b1165	JW1152	gene1178	ymgA	343.67	83.13	-0.65	0.45	-4.13	0.23	-6.30	0.46	-6.30	0.55	-8.42	0.77	-7.97	0.74	-2.63	0.23	-2.88	0.28	-3.04	0.22	-0.38	0.50
b1166	JW1153	gene1179	ariR	622.00	152.22	-2.06	0.44	-6.15	0.24	-7.53	0.71	-7.16	0.55	-9.70	0.87	-9.63	0.92	-3.02	0.21	-2.57	0.28	-3.08	0.20	-0.42	0.49
b0123	JW0119	gene118	cueO	284.33	42.85	-0.81	0.24	-2.10	0.10	-2.03	0.18	-1.87	0.23	-1.42	0.21	-1.30	0.34	-1.60	0.17	-0.83	0.20	-0.60	0.14	0.05	0.16
b1167	JW1154	gene1180	ymgC	393.67	77.38	-1.67	0.51	-5.21	0.19	-6.89	0.50	-6.22	0.49	-8.01	0.63	-9.82	1.12	-2.72	0.20	-2.43	0.25	-2.87	0.19	-0.43	0.40
b1168	JW5174	gene1181	ycgG	52.00	10.60	0.16	0.45	-3.03	0.23	-5.46	0.83	-4.18	0.60	-4.67	0.61	-3.89	0.55	-2.66	0.37	-2.51	0.39	-1.96	0.33	-1.05	0.32
b4520	JW1156	gene1182	ymgF	6.00	1.53	-0.46	0.75	1.92	0.39	2.33	0.50	2.13	0.74	0.76	0.60	1.63	0.57	0.97	0.56	0.28	0.60	-0.01	0.58	0.14	0.39
-	-	gene1183	ycgH	20.67	3.84	0.62	0.47	1.26	0.23	0.21	0.39	0.34	0.43	-0.47	0.42	-0.80	0.43	-0.36	0.39	-0.55	0.41	-0.26	0.38	-0.37	0.28
b1171	JW5177	gene1184	ymgD	5.33	2.19	0.97	0.76	3.08	0.39	2.05	0.58	1.32	0.76	1.72	0.59	2.62	0.74	1.19	0.57	0.66	0.61	0.36	0.61	0.22	0.42
b1172	Null	gene1185	ymgG	2.00	1.00	-0.31	0.77	3.25	0.61	1.90	0.88	1.33	0.99	2.18	0.82	2.83	0.87	-1.36	1.12	-0.82	0.95	-0.72	0.80	-0.29	0.51
b4593	Null	gene1186	ymgI	0.33	0.33	0.25	0.58	-3.91	2.29	0.87	2.04	-0.08	2.04	-1.70	2.22	-0.01	1.65	-0.88	1.09	-0.07	0.88	-0.38	0.51	-0.04	0.41
b4594	Null	gene1187	ymgJ	0.00	0.00	NA	NA	3.55	2.04	1.72	2.51	1.91	2.09	1.30	2.22	2.29	1.65	NA	NA	NA	NA	NA	NA	0.12	0.25
-	-	gene1188	ycgI	13.00	0.58	0.07	0.65	-3.03	0.40	-6.57	1.95	-2.64	0.75	-5.09	1.23	-3.96	0.95	-1.36	0.55	-0.78	0.51	-0.90	0.48	-0.18	0.32
b1174	JW1163	gene1189	minE	89.67	16.19	-0.49	0.37	2.12	0.13	1.63	0.17	2.22	0.31	2.10	0.19	1.70	0.21	1.89	0.18	1.58	0.24	1.17	0.17	0.47	0.23
b0124	JW0120	gene119	gcd	1353.67	257.65	-0.05	0.45	-0.02	0.14	-0.63	0.12	-1.42	0.81	-5.70	0.21	-4.72	0.52	0.16	0.12	0.02	0.18	-1.49	0.13	-0.75	0.29
b1175	JW1164	gene1190	minD	455.33	71.64	-0.23	0.22	1.00	0.10	1.27	0.11	1.59	0.29	1.53	0.15	1.16	0.16	1.30	0.15	1.07	0.16	0.79	0.12	0.32	0.19
b1176	JW1165	gene1191	minC	285.00	50.09	0.38	0.37	0.97	0.10	0.99	0.14	1.23	0.22	0.73	0.17	0.88	0.20	0.74	0.15	0.48	0.18	0.63	0.13	0.27	0.16
b1177	JW1166	gene1192	ycgJ	18.67	3.18	0.18	0.70	2.60	0.24	1.68	0.32	1.90	0.37	1.78	0.31	2.07	0.34	2.27	0.30	2.15	0.30	0.80	0.33	0.51	0.27
b1178	JW1167	gene1193	pliG	88.33	16.29	-1.57	0.50	-3.10	0.25	-1.08	0.26	-0.70	0.34	0.10	0.23	0.41	0.34	1.54	0.19	1.21	0.24	1.18	0.17	0.32	0.30
b1179	JW1168	gene1194	ycgL	119.33	15.17	-0.51	0.34	0.63	0.14	0.47	0.18	0.74	0.23	0.55	0.21	0.18	0.23	-0.03	0.20	-0.22	0.23	-0.05	0.18	-0.13	0.18
b1180	JW1169	gene1195	ycgM	106.33	18.10	0.13	0.33	-0.03	0.12	-0.07	0.20	-0.02	0.23	-0.13	0.21	-0.09	0.22	0.28	0.19	0.36	0.21	0.47	0.17	0.38	0.16
b1181	JW5180	gene1196	ycgN	106.00	16.17	-0.31	0.38	0.33	0.13	0.11	0.19	-0.18	0.28	-0.96	0.24	-0.57	0.23	0.34	0.18	-0.35	0.27	-0.41	0.19	-0.31	0.17
b1182	JW5181	gene1197	hlyE	64.00	8.39	-0.71	0.60	-3.96	0.22	-5.40	0.73	-4.52	0.58	-3.85	0.45	-1.52	0.31	1.55	0.20	2.04	0.26	1.10	0.20	0.54	0.26
b1183	JW1172	gene1198	umuD	9.00	2.00	-0.72	0.74	-0.70	0.40	-1.08	0.72	-0.15	0.60	-0.49	0.62	-0.05	0.56	0.70	0.48	0.55	0.50	-0.04	0.50	-0.05	0.37
b1184	JW1173	gene1199	umuC	14.33	4.26	0.52	0.58	-0.08	0.30	-1.93	0.70	-0.65	0.58	-1.34	0.60	-0.98	0.55	0.07	0.43	-0.26	0.48	-0.18	0.44	-0.01	0.34
b0014	JW0013	gene12	dnaK	29203.00	4893.70	-0.99	0.21	-2.20	0.20	-1.10	0.10	0.21	0.57	-0.78	0.18	-2.20	0.26	-2.05	0.13	-1.22	0.14	-0.16	0.12	-0.21	0.18
b0125	JW5009	gene120	hpt	302.33	40.19	-0.05	0.27	2.31	0.09	1.92	0.12	1.54	0.34	0.64	0.15	0.30	0.19	-0.92	0.15	-0.47	0.18	-0.31	0.14	-0.28	0.16
b1185	JW5182	gene1200	dsbB	66.33	9.40	0.56	0.42	2.01	0.13	2.19	0.18	1.52	0.37	1.02	0.23	0.55	0.32	-0.61	0.24	-0.14	0.28	0.55	0.21	0.65	0.23
b1186	JW1175	gene1201	nhaB	79.00	17.24	0.82	0.33	2.84	0.13	3.22	0.16	2.86	0.31	2.75	0.20	2.07	0.24	1.62	0.19	1.64	0.22	1.13	0.19	0.67	0.24
b1187	JW1176	gene1202	fadR	86.00	15.50	1.80	0.41	2.65	0.12	1.47	0.17	1.33	0.31	1.10	0.20	1.06	0.23	0.27	0.21	-0.03	0.27	0.31	0.19	0.13	0.24
b1188	JW1177	gene1203	ycgB	4241.67	648.20	-1.01	0.33	-8.50	0.13	-8.67	0.29	-7.84	0.33	-7.03	0.20	-3.76	0.52	-0.85	0.12	-0.80	0.15	-0.92	0.11	-0.70	0.13
b1189	JW1178	gene1204	dadA	4856.33	791.03	0.07	0.37	-5.63	0.09	-5.87	0.14	-1.97	0.80	-5.55	0.26	-5.72	0.58	-0.75	0.12	-0.83	0.15	-1.47	0.12	-0.72	0.28
b1190	JW1179	gene1205	dadX	1950.00	348.84	0.34	0.34	-5.24	0.10	-5.23	0.17	-1.69	0.74	-4.82	0.28	-5.18	0.59	-0.60	0.12	-0.67	0.18	-1.22	0.13	-0.62	0.27
b1191	JW5184	gene1206	cvrA	29.67	4.10	1.56	0.48	1.62	0.20	0.75	0.31	0.99	0.39	0.94	0.30	1.20	0.35	0.94	0.29	1.26	0.31	1.64	0.25	0.86	0.30
b1192	JW1181	gene1207	ldcA	70.67	8.67	1.01	0.29	-0.11	0.15	0.26	0.23	0.19	0.26	0.21	0.23	0.15	0.28	0.32	0.21	0.45	0.23	0.67	0.19	0.44	0.18
b1193	JW5821	gene1208	emtA	110.67	21.46	0.75	0.32	1.30	0.12	1.19	0.17	0.77	0.36	0.46	0.20	-0.07	0.27	-0.23	0.20	-0.20	0.22	0.26	0.18	0.23	0.18
b1194	JW1183	gene1209	ycgR	5.00	0.58	-0.47	0.80	-2.31	0.59	-2.17	1.12	-0.90	0.81	-2.14	1.02	-1.12	0.81	0.22	0.64	-0.21	0.67	0.54	0.56	-0.03	0.43
b0126	JW0122	gene121	can	304.33	58.77	1.01	0.27	1.92	0.15	2.66	0.14	2.74	0.25	1.42	0.18	0.56	0.28	0.21	0.17	0.48	0.24	0.52	0.15	0.49	0.20
b1195	JW1184	gene1210	ymgE	183.33	26.34	-0.88	0.40	-6.43	0.24	-7.25	0.78	-6.39	0.61	-6.02	0.49	-3.04	0.49	0.17	0.17	0.28	0.19	-0.18	0.16	0.08	0.16
b1196	JW1185	gene1211	ycgY	3.67	2.19	1.05	0.79	-0.22	0.60	-0.62	1.08	-1.01	1.08	-1.27	1.09	-0.44	0.95	1.52	0.63	1.44	0.65	0.29	0.67	0.75	0.44
b1197	JW1186	gene1212	treA	812.67	145.38	-0.90	0.35	-5.09	0.13	-4.93	0.22	-3.88	0.42	-3.02	0.18	-1.08	0.44	0.67	0.14	0.89	0.21	0.35	0.12	-0.04	0.15
b1198	JW5185	gene1213	dhaM	249.67	46.31	-0.52	0.27	-0.32	0.13	-0.28	0.15	1.92	0.57	2.43	0.16	-0.97	0.22	-0.46	0.17	-0.35	0.20	-0.03	0.14	-0.22	0.21
b1199	JW5186	gene1214	dhaL	54.67	10.14	0.75	0.35	0.07	0.21	-0.23	0.27	1.91	0.56	2.82	0.24	-0.13	0.29	0.52	0.23	0.92	0.26	0.88	0.21	0.65	0.23
b1200	JW5187	gene1215	dhaK	194.33	30.93	1.89	0.36	-0.20	0.14	-0.17	0.17	1.91	0.54	2.50	0.21	-0.56	0.23	0.51	0.17	0.72	0.19	0.70	0.16	0.32	0.23
b1201	JW5188	gene1216	dhaR	80.33	16.18	-0.19	0.34	-0.04	0.17	-0.09	0.22	0.42	0.31	0.18	0.23	-0.12	0.25	0.52	0.21	0.53	0.22	0.02	0.20	0.01	0.18
b1202	JW1193	gene1217	ycgV	51.33	4.37	0.65	0.39	-0.43	0.17	-0.98	0.32	-0.97	0.37	-0.38	0.30	0.38	0.31	0.33	0.24	-0.18	0.30	0.25	0.24	0.08	0.22
b1203	JW1194	gene1218	ychF	439.00	78.89	0.20	0.25	2.41	0.12	2.46	0.12	1.85	0.38	1.24	0.16	0.81	0.30	0.21	0.15	0.11	0.18	0.24	0.13	0.11	0.17
b1204	JW1195	gene1219	pth	135.67	26.49	0.34	0.36	1.46	0.14	1.16	0.17	0.47	0.42	-0.16	0.23	-0.50	0.30	-1.31	0.22	-0.85	0.26	-0.19	0.19	-0.13	0.20
b0127	JW0123	gene122	yadG	274.00	54.01	-0.36	0.30	0.26	0.17	-0.10	0.17	-0.32	0.29	-1.05	0.21	-1.39	0.28	-0.83	0.19	-0.99	0.22	-1.16	0.18	-0.75	0.21
b1205	JW1196	gene1220	ychH	5410.67	666.08	-1.32	0.41	-10.49	0.17	-9.19	0.30	-5.93	0.65	-3.84	0.16	-1.91	0.19	-0.20	0.12	-0.31	0.16	-0.37	0.10	-0.47	0.19
b1206	JW5189	gene1221	dauA	34.33	2.19	0.55	0.44	3.01	0.17	2.55	0.22	1.49	0.49	2.33	0.24	2.37	0.43	-0.52	0.31	-0.18	0.32	-0.11	0.29	-0.36	0.23
b1207	JW1198	gene1222	prs	1599.67	243.71	-0.25	0.30	1.50	0.07	1.96	0.09	1.06	0.48	0.58	0.13	1.00	0.31	-1.71	0.12	-1.04	0.20	0.12	0.10	-0.43	0.25
b1208	JW1199	gene1223	ispE	634.67	92.33	0.01	0.24	0.36	0.09	0.98	0.12	0.22	0.40	0.00	0.15	0.39	0.29	-1.11	0.14	-0.77	0.20	0.09	0.12	-0.37	0.21
b1209	JW1200	gene1224	lolB	243.67	40.31	-0.34	0.26	-0.50	0.11	-0.50	0.17	-0.35	0.20	-0.45	0.17	-0.30	0.21	-0.66	0.16	-0.10	0.26	0.25	0.14	0.17	0.14
b1210	JW1201	gene1225	hemA	303.00	35.54	1.02	0.34	0.10	0.09	-0.54	0.14	-0.78	0.27	-0.72	0.17	-0.45	0.19	-0.97	0.16	-0.72	0.18	-0.14	0.14	-0.24	0.17
b1211	JW1202	gene1226	prfA	192.67	32.52	-0.07	0.26	0.78	0.11	0.32	0.16	0.05	0.32	0.13	0.18	-0.52	0.25	-1.57	0.20	-1.19	0.24	-0.48	0.17	-0.35	0.19
b1212	JW1203	gene1227	prmC	19.00	2.65	1.29	0.48	2.70	0.22	2.15	0.30	1.48	0.47	1.63	0.33	0.93	0.36	-0.41	0.41	-0.49	0.43	0.37	0.35	0.58	0.28
b1213	JW1204	gene1228	ychQ	11.00	1.73	0.04	0.64	2.19	0.28	0.89	0.47	1.49	0.46	0.47	0.49	0.70	0.47	0.77	0.42	0.84	0.44	0.73	0.41	0.95	0.36
b1214	JW1205	gene1229	ychA	315.00	45.50	-0.37	0.31	0.92	0.12	0.16	0.14	-0.12	0.29	-0.96	0.20	-0.74	0.22	-0.67	0.16	-0.68	0.19	-0.50	0.15	-0.23	0.16
b0128	JW0124	gene123	yadH	196.33	42.88	-0.97	0.36	-0.20	0.15	-0.11	0.18	-0.48	0.31	-0.92	0.23	-0.89	0.25	-0.61	0.20	-0.77	0.22	-0.85	0.18	-0.59	0.19
b1215	JW1206	gene1230	kdsA	499.67	61.52	-0.47	0.24	0.97	0.09	1.08	0.11	0.67	0.27	1.01	0.14	1.52	0.21	0.15	0.14	0.51	0.18	0.40	0.12	0.13	0.14
b4419	JW5957	gene1231	ldrA	13.33	1.20	-2.66	0.79	-4.80	0.61	-4.10	1.07	-6.24	1.66	-3.93	0.93	-4.02	0.96	-2.53	0.64	-3.02	0.71	-1.38	0.52	-1.99	0.39
b4421	JW5958	gene1233	ldrB	4.00	1.00	-1.37	0.79	-2.24	0.66	-3.13	1.48	-1.91	1.12	-2.20	1.12	-1.84	1.05	-1.25	0.86	-2.37	0.93	-0.64	0.70	-0.50	0.47
b4423	JW5959	gene1235	ldrC	10.33	2.03	-0.71	0.73	-3.22	0.58	-1.14	0.68	-4.48	1.27	-6.35	1.76	-2.90	0.88	-1.47	0.61	-2.10	0.69	-2.01	0.62	-1.36	0.42
b1216	JW1207	gene1237	chaA	37.67	5.61	0.09	0.44	2.24	0.17	4.14	0.19	3.85	0.29	2.96	0.24	0.74	0.36	0.58	0.27	1.18	0.29	1.38	0.23	0.46	0.24
b1217	JW1208	gene1238	chaB	118.67	16.50	-1.74	0.40	-3.08	0.16	-5.18	0.52	-3.88	0.40	-3.35	0.31	-1.91	0.36	0.16	0.18	0.52	0.21	0.13	0.18	0.11	0.18
b1218	JW1209	gene1239	chaC	150.67	33.89	1.30	0.28	-2.24	0.14	-3.65	0.32	-2.69	0.32	-2.85	0.28	-1.91	0.38	-0.22	0.19	0.38	0.21	0.32	0.17	0.48	0.18
b0129	JW0125	gene124	yadI	50.67	6.06	0.10	0.39	-0.76	0.19	-1.17	0.33	-0.57	0.42	0.04	0.28	1.31	0.27	0.80	0.25	-0.05	0.34	-0.38	0.27	-0.62	0.25
b1219	JW1210	gene1240	ychN	188.33	39.47	-0.60	0.31	-1.58	0.15	-0.90	0.18	0.07	0.24	0.71	0.19	1.08	0.20	1.49	0.17	0.77	0.25	0.37	0.15	-0.12	0.21
b1220	JW1211	gene1241	ychO	51.33	12.33	0.57	0.41	0.02	0.18	-1.34	0.35	-0.58	0.40	-1.60	0.35	-1.98	0.39	-1.73	0.33	-1.51	0.34	-1.11	0.30	-0.82	0.23
b1221	JW1212	gene1242	narL	164.00	21.70	-1.45	0.40	-0.73	0.11	-0.09	0.17	0.03	0.27	1.51	0.20	0.85	0.19	1.09	0.16	1.14	0.18	0.89	0.14	0.36	0.18
b1222	JW1213	gene1243	narX	238.00	39.85	-0.10	0.25	-0.95	0.11	-0.68	0.18	-0.92	0.30	0.77	0.16	-0.71	0.21	-0.39	0.17	-0.45	0.18	-0.21	0.14	-0.13	0.14
b1223	JW1214	gene1244	narK	82.33	11.92	-0.49	0.36	-5.01	0.29	-5.75	0.72	-3.61	0.70	5.86	0.19	1.65	0.38	0.87	0.22	0.95	0.21	1.11	0.18	0.50	0.35
b1224	JW1215	gene1245	narG	814.33	242.91	-0.47	0.75	-5.30	0.25	-5.56	0.45	-4.54	0.54	4.26	0.24	-1.11	0.34	1.51	0.20	2.14	0.25	1.72	0.31	0.98	0.36
b1225	JW1216	gene1246	narH	241.33	57.89	-0.27	0.77	-4.46	0.18	-4.99	0.37	-4.15	0.44	3.49	0.24	-1.55	0.31	1.25	0.16	1.88	0.20	1.62	0.15	1.31	0.28
b1226	JW1217	gene1247	narJ	41.67	10.68	0.45	0.71	-3.56	0.27	-4.46	0.71	-4.04	0.65	3.46	0.24	-1.24	0.38	1.43	0.24	2.29	0.29	2.15	0.22	1.80	0.29
b1227	JW1218	gene1248	narI	58.00	16.44	0.31	0.62	-4.02	0.35	-4.70	0.66	-3.91	0.61	3.56	0.29	-0.97	0.38	1.66	0.24	2.59	0.28	2.41	0.22	1.85	0.33
b0130	JW0126	gene125	yadE	74.00	12.34	-0.09	0.39	0.04	0.14	-0.37	0.24	-0.43	0.38	-1.15	0.27	-0.41	0.34	-0.16	0.23	-0.34	0.26	-0.67	0.24	-0.60	0.19
b1229	JW1219	gene1250	tpr	0.33	0.33	4.09	0.77	8.08	1.11	7.06	1.18	6.11	1.23	2.19	1.59	1.67	1.47	1.28	1.23	1.47	0.98	0.20	0.69	0.68	0.50
b1232	JW1220	gene1253	purU	102.00	22.00	0.09	0.34	2.49	0.14	2.35	0.17	2.00	0.29	1.23	0.21	0.54	0.25	0.64	0.20	1.06	0.25	0.86	0.19	0.67	0.20
b1233	JW1221	gene1254	ychJ	21.67	5.36	1.14	0.54	2.85	0.22	2.84	0.26	2.46	0.43	1.56	0.31	1.84	0.34	1.01	0.32	0.92	0.33	1.23	0.30	0.65	0.26
b1234	JW1222	gene1255	rssA	193.00	35.70	0.54	0.32	-0.29	0.12	-0.81	0.19	-0.77	0.24	-0.81	0.22	-0.54	0.23	0.89	0.16	0.69	0.19	0.35	0.15	0.50	0.18
b1235	JW1223	gene1256	rssB	908.33	162.68	-0.70	0.32	-2.70	0.13	-2.81	0.16	-2.82	0.25	-3.07	0.20	-2.29	0.38	-0.31	0.14	-0.32	0.18	-0.38	0.13	-0.20	0.18
b1236	JW1224	gene1257	galU	603.67	104.32	-1.11	0.27	1.24	0.13	1.37	0.12	1.15	0.25	0.89	0.16	1.03	0.20	0.74	0.15	0.90	0.18	0.53	0.12	0.33	0.15
b1237	JW1225	gene1258	hns	1993.33	303.98	-0.73	0.19	2.08	0.07	1.49	0.11	1.32	0.23	1.02	0.13	1.46	0.18	1.78	0.13	1.73	0.17	1.04	0.10	0.74	0.11
b1238	JW1226	gene1259	tdk	20.67	3.93	0.90	0.48	4.11	0.24	3.47	0.25	3.09	0.46	2.74	0.27	2.04	0.42	0.60	0.33	0.60	0.35	0.90	0.33	0.68	0.26
b0131	JW0127	gene126	panD	265.33	46.04	1.78	0.28	1.13	0.12	1.24	0.14	1.57	0.23	1.22	0.15	0.32	0.19	-0.03	0.16	0.04	0.18	0.29	0.14	0.06	0.17
-	-	gene1260	insZ	4.33	0.33	2.33	0.61	1.79	0.45	1.37	0.66	1.85	0.60	0.28	0.79	1.11	0.71	-0.54	0.76	0.18	0.69	0.17	0.63	-0.07	0.43
b1241	JW1228	gene1261	adhE	25402.00	4143.66	-1.12	0.32	-3.78	0.14	-3.05	0.11	-1.32	0.50	-1.08	0.15	-0.32	0.17	-1.69	0.13	-1.28	0.17	-1.12	0.12	-1.00	0.14
b1242	JW1229	gene1262	ychE	16.67	4.33	1.26	0.63	2.81	0.25	2.27	0.32	1.83	0.51	1.04	0.40	1.25	0.38	1.26	0.35	0.68	0.39	0.42	0.38	0.22	0.29
b1243	JW1235	gene1263	oppA	4953.33	829.75	-0.14	0.32	0.32	0.08	-0.06	0.10	-0.33	0.20	-0.45	0.13	-0.56	0.17	1.86	0.11	2.43	0.19	1.56	0.13	0.98	0.21
b1244	JW1236	gene1264	oppB	210.67	48.89	0.77	0.29	1.99	0.13	0.94	0.16	0.71	0.31	0.46	0.20	-0.11	0.24	1.42	0.16	2.08	0.22	1.80	0.15	1.78	0.22
b1245	JW1237	gene1265	oppC	340.33	55.66	-0.03	0.28	1.21	0.09	0.86	0.13	0.49	0.29	0.47	0.15	0.29	0.18	1.01	0.14	1.76	0.21	1.76	0.12	1.48	0.19
b1246	JW1238	gene1266	oppD	577.00	102.73	0.00	0.22	1.05	0.11	0.61	0.12	0.30	0.30	0.04	0.16	0.42	0.18	0.94	0.14	1.57	0.21	1.58	0.14	1.32	0.20
b1247	JW1239	gene1267	oppF	547.67	100.87	-0.07	0.23	0.93	0.12	0.87	0.13	0.52	0.28	0.34	0.17	0.67	0.20	1.27	0.14	1.91	0.21	1.79	0.13	1.19	0.24
b1248	JW1240	gene1268	yciU	66.00	11.59	-0.59	0.38	0.60	0.15	-0.39	0.25	0.01	0.29	-0.10	0.25	-0.02	0.29	0.17	0.24	-0.26	0.30	-0.04	0.22	0.22	0.20
b1249	JW1241	gene1269	clsA	325.33	54.46	0.10	0.27	-0.79	0.09	-0.49	0.14	-0.42	0.19	-0.47	0.16	-0.45	0.22	0.56	0.14	0.57	0.16	0.50	0.13	0.42	0.16
b0132	JW5010	gene127	yadD	10.00	4.16	1.23	0.68	1.19	0.34	-0.48	0.67	0.32	0.65	-0.11	0.65	0.53	0.59	1.14	0.45	-0.45	0.59	-0.12	0.52	0.24	0.40
b4595	Null	gene1270	yciY	12.33	1.45	0.06	0.76	0.04	0.35	-0.03	0.52	-1.09	0.60	-0.27	0.51	0.04	0.50	-0.41	0.48	-0.84	0.54	-0.51	0.47	-0.53	0.39
b1250	JW1242	gene1271	kch	154.67	30.36	-0.43	0.34	-0.48	0.16	-1.55	0.22	-1.21	0.28	-1.04	0.24	-0.53	0.25	0.18	0.18	0.56	0.26	0.74	0.16	0.45	0.19
b1251	JW1243	gene1272	yciI	56.67	4.33	1.55	0.41	-0.07	0.16	0.23	0.24	0.96	0.34	1.39	0.23	2.00	0.25	2.27	0.20	2.24	0.23	2.32	0.19	1.50	0.25
b1252	JW5195	gene1273	tonB	266.00	47.62	1.51	0.24	0.29	0.10	0.63	0.14	-0.16	0.38	-2.44	0.23	-2.86	0.33	-3.49	0.22	-3.24	0.25	-2.78	0.19	-1.23	0.35
b1253	JW1245	gene1274	yciA	25.67	4.41	1.07	0.50	3.73	0.20	2.61	0.24	2.22	0.47	1.30	0.29	0.45	0.40	-0.74	0.36	-0.88	0.40	0.18	0.31	0.69	0.24
b1254	JW1246	gene1275	yciB	145.67	21.34	-0.33	0.29	0.95	0.13	0.97	0.16	0.40	0.42	-0.08	0.20	-0.23	0.26	-0.07	0.18	-0.10	0.22	0.41	0.16	0.19	0.24
b1255	JW1247	gene1276	yciC	127.00	16.65	0.14	0.28	1.11	0.12	1.14	0.16	0.54	0.42	0.17	0.19	-0.19	0.25	-0.42	0.19	-0.48	0.21	0.17	0.17	0.02	0.21
b1256	JW1248	gene1277	ompW	421.67	102.20	-0.31	0.79	-6.98	0.24	-6.22	0.58	-4.50	0.49	-0.35	0.19	2.50	0.23	3.35	0.19	2.52	0.23	1.81	0.14	1.09	0.34
b1257	JW1249	gene1278	yciE	832.33	167.21	-3.06	0.46	-6.49	0.20	-7.34	0.41	-7.82	0.53	-6.22	0.30	-5.00	0.29	-3.21	0.17	-1.44	0.27	-1.58	0.17	-0.58	0.29
b1258	JW1250	gene1279	yciF	760.33	155.24	-2.56	0.42	-8.76	0.28	-9.71	0.89	-8.86	0.72	-8.51	0.55	-5.44	0.38	-3.24	0.18	-1.49	0.29	-1.62	0.17	-0.56	0.31
b0133	JW0129	gene128	panC	590.67	102.55	-0.07	0.20	-0.09	0.09	0.02	0.11	-0.05	0.18	0.02	0.14	0.10	0.19	-0.04	0.14	-0.03	0.15	-0.01	0.12	-0.22	0.17
b1259	JW1251	gene1280	yciG	967.33	136.32	-2.71	0.53	-11.52	0.51	-11.98	1.56	-9.97	0.86	-10.96	1.03	-8.08	0.51	-3.96	0.18	-2.63	0.20	-2.90	0.15	-1.11	0.35
b1260	JW1252	gene1281	trpA	113.67	15.32	0.27	0.44	-2.16	0.14	-1.18	0.23	-0.80	0.33	-1.18	0.27	-1.43	0.36	0.14	0.19	1.75	0.61	1.43	0.16	0.79	0.20
b1261	JW1253	gene1282	trpB	153.00	24.58	0.71	0.39	-2.18	0.15	-1.70	0.22	-0.88	0.33	-1.41	0.27	-1.76	0.33	-0.37	0.19	1.45	0.65	1.16	0.14	0.67	0.17
b1262	JW1254	gene1283	trpC	158.67	28.79	0.50	0.34	-2.60	0.15	-2.85	0.26	-1.77	0.34	-3.35	0.28	-3.84	0.39	-1.51	0.21	0.60	0.65	0.37	0.16	0.37	0.16
b1263	JW1255	gene1284	trpD	105.33	10.40	1.12	0.45	-3.77	0.18	-2.44	0.29	-3.31	0.39	-3.27	0.33	-4.09	0.43	-3.12	0.29	1.31	0.89	1.52	0.16	0.83	0.24
b1264	JW1256	gene1285	trpE	96.67	11.86	0.89	0.43	-3.53	0.18	-2.07	0.29	-2.75	0.46	-3.78	0.37	-5.11	0.55	-4.45	0.39	1.31	0.92	1.60	0.16	0.75	0.29
b1265	JW1257	gene1286	trpL	4.33	0.88	-1.45	0.80	-1.56	0.58	-2.46	1.27	-4.82	1.81	-2.26	1.12	-4.28	1.48	-1.29	0.84	-0.12	0.77	0.49	0.61	-0.16	0.45
b1266	JW1258	gene1287	yciV	119.67	21.67	0.02	0.35	-0.19	0.15	-0.57	0.21	-0.74	0.38	-0.51	0.28	-0.23	0.25	0.41	0.20	0.73	0.22	0.79	0.17	0.58	0.19
b1267	JW5196	gene1288	yciO	417.00	55.97	-1.69	0.27	-1.78	0.12	-1.25	0.15	-1.49	0.26	-1.44	0.17	-0.99	0.19	0.23	0.15	0.35	0.17	0.09	0.13	0.17	0.17
b1268	JW5197	gene1289	yciQ	25.00	2.08	0.23	0.47	0.88	0.22	0.13	0.35	-0.08	0.38	-0.67	0.39	-0.30	0.38	0.87	0.30	0.72	0.32	0.59	0.30	0.69	0.25
b0134	JW0130	gene129	panB	253.00	53.80	1.09	0.25	0.62	0.13	0.19	0.16	0.10	0.23	0.57	0.23	0.62	0.24	0.36	0.16	0.55	0.18	0.35	0.15	0.32	0.17
b1269	JW1261	gene1290	rluB	89.33	16.01	1.51	0.42	3.94	0.11	3.35	0.15	2.39	0.60	2.00	0.22	1.63	0.41	-0.15	0.21	0.24	0.24	0.68	0.18	0.67	0.17
b1270	JW1262	gene1291	btuR	117.67	21.34	-0.39	0.34	-0.94	0.17	-1.00	0.23	-0.62	0.30	-0.77	0.22	-0.91	0.29	-1.26	0.22	-1.10	0.24	-0.46	0.20	-0.64	0.19
b1271	JW1263	gene1292	yciK	205.67	43.03	-0.53	0.33	-1.51	0.13	-1.06	0.19	-0.48	0.27	-0.55	0.20	-0.91	0.23	-0.89	0.18	-0.59	0.20	-0.39	0.16	-0.54	0.17
b1272	JW1264	gene1293	sohB	277.00	46.97	-0.23	0.29	-0.22	0.13	-0.71	0.16	-0.73	0.31	-0.52	0.18	-0.55	0.22	-0.48	0.17	-0.58	0.20	-0.47	0.15	-0.25	0.15
b1273	JW1265	gene1294	yciN	622.33	97.65	-1.82	0.35	-2.26	0.14	-0.96	0.13	-0.99	0.29	-0.95	0.17	-0.34	0.18	0.15	0.15	-0.20	0.19	0.07	0.14	-0.27	0.14
b1274	JW1266	gene1295	topA	3239.67	542.15	-0.85	0.18	0.32	0.07	0.32	0.09	0.14	0.19	-0.65	0.13	-1.61	0.15	-1.18	0.11	-0.57	0.15	-0.17	0.10	-0.11	0.13
b1275	JW1267	gene1296	cysB	165.00	22.23	1.21	0.37	1.11	0.16	1.11	0.17	1.33	0.26	0.97	0.21	0.74	0.28	0.71	0.20	0.79	0.36	-0.49	0.19	-0.78	0.21
b4522	Null	gene1297	ymiA	2.67	1.45	0.63	0.81	3.83	0.52	2.58	0.72	2.31	0.79	2.69	0.70	3.52	0.64	3.53	0.55	2.36	0.62	2.06	0.57	0.69	0.49
b4523	JW5199; JW5198	gene1298	yciX	4.67	1.20	2.55	0.62	4.52	0.42	3.49	0.48	3.14	0.52	3.16	0.51	3.83	0.47	3.53	0.46	2.52	0.49	1.73	0.49	0.82	0.44
b1276	JW1268	gene1299	acnA	10246.00	2140.37	-1.99	0.17	-6.35	0.11	-6.66	0.14	-5.25	0.42	-5.73	0.17	-4.59	0.45	-0.60	0.12	0.39	0.21	-0.06	0.11	0.58	0.18
b0015	JW0014	gene13	dnaJ	1243.67	317.33	0.29	0.27	-0.24	0.23	-0.44	0.16	-0.15	0.28	-0.77	0.18	-1.83	0.26	-2.15	0.18	-1.07	0.21	-0.21	0.15	0.19	0.20
b0135	JW0131	gene130	yadC	2.33	1.33	-0.68	0.77	2.76	0.58	1.91	0.85	2.07	0.86	0.80	0.91	1.30	0.82	1.53	0.73	1.24	0.73	0.99	0.66	0.56	0.48
b1277	JW1269	gene1300	ribA	104.33	23.50	1.12	0.31	2.21	0.15	2.03	0.17	1.60	0.37	1.34	0.19	1.76	0.25	0.36	0.20	0.12	0.22	0.56	0.18	0.30	0.22
b1278	JW1270	gene1301	pgpB	97.00	16.86	0.64	0.28	-0.34	0.14	-0.99	0.24	-0.96	0.35	-1.07	0.25	-0.19	0.26	0.40	0.19	0.42	0.22	0.15	0.18	0.56	0.16
b1279	JW1271	gene1302	yciS	205.00	24.43	-0.42	0.27	-0.61	0.12	-0.42	0.17	-0.09	0.27	-0.79	0.21	-0.89	0.23	0.19	0.16	-0.07	0.20	0.39	0.14	0.05	0.18
b1280	JW1272	gene1303	yciM	180.67	30.96	0.42	0.31	-0.07	0.11	0.28	0.17	0.51	0.26	-0.27	0.23	-0.47	0.24	0.07	0.16	-0.06	0.20	0.67	0.14	0.41	0.20
b1281	JW1273	gene1304	pyrF	76.67	15.01	0.89	0.60	2.89	0.13	2.62	0.17	1.88	0.56	0.72	0.22	0.44	0.44	-1.41	0.26	-0.87	0.27	0.12	0.21	-0.01	0.18
b1282	JW1274	gene1305	yciH	5.67	1.45	0.26	0.79	4.92	0.36	3.09	0.50	2.67	0.72	1.55	0.56	1.53	0.76	-1.69	0.82	-1.59	0.78	-0.04	0.61	0.88	0.38
b1283	JW1275	gene1306	osmB	2255.33	403.98	-1.85	0.26	-2.68	0.21	-7.10	0.26	-7.13	0.36	-6.42	0.23	-4.90	0.35	-2.14	0.15	-1.32	0.19	-1.16	0.14	-0.79	0.21
b1284	JW1276	gene1307	yciT	25.00	3.51	1.06	0.48	3.10	0.20	3.49	0.23	3.94	0.36	3.17	0.25	2.32	0.30	2.32	0.27	1.91	0.28	1.68	0.27	0.74	0.25
b4596	Null	gene1308	yciZ	5.33	0.67	1.58	0.64	2.93	0.40	2.08	0.55	2.73	0.54	1.95	0.53	1.67	0.53	1.74	0.50	1.20	0.55	0.95	0.52	0.64	0.39
b1285	JW1278	gene1309	gmr	950.67	155.87	-0.90	0.31	-3.63	0.14	-3.03	0.15	-2.74	0.25	-2.97	0.17	-2.25	0.34	0.56	0.13	0.32	0.16	-0.08	0.12	-0.10	0.16
b0136	JW0132	gene131	yadK	1.33	0.88	-0.43	0.62	1.87	0.78	0.97	1.25	0.86	1.32	0.98	1.16	1.11	1.08	1.39	0.91	1.16	0.86	0.86	0.76	0.51	0.51
b4672	Null	gene1310	ymiB	1.67	0.33	-0.20	0.78	-0.89	0.86	-3.98	2.23	-3.70	1.95	-2.25	1.62	-0.08	1.16	0.48	0.94	0.22	0.88	0.12	0.77	0.06	0.50
b1286	JW1279	gene1311	rnb	1189.33	178.25	-0.94	0.28	1.18	0.11	1.12	0.10	0.51	0.26	0.23	0.18	-0.23	0.28	-3.13	0.14	-2.01	0.16	-1.31	0.12	-1.44	0.16
b1287	JW5200	gene1312	yciW	1855.67	334.26	-4.10	0.29	-4.08	0.12	-5.29	0.17	-5.47	0.31	-5.82	0.22	-3.94	0.22	-7.36	0.24	-2.98	0.76	-4.04	0.14	-3.13	0.23
b1288	JW1281	gene1313	fabI	2876.67	395.49	-0.68	0.21	0.08	0.06	0.88	0.09	0.43	0.33	0.25	0.13	0.10	0.15	-0.89	0.12	-0.27	0.21	0.34	0.10	0.01	0.16
b1289	JW1282	gene1314	ycjD	14.00	1.73	0.21	0.59	0.34	0.28	-0.21	0.51	-0.39	0.53	-0.82	0.53	-0.39	0.50	-0.24	0.44	-0.35	0.46	0.01	0.42	0.10	0.30
b1290	JW1283	gene1315	sapF	124.33	19.65	-0.16	0.32	-0.48	0.12	-0.16	0.19	-0.43	0.38	-0.55	0.21	-0.46	0.22	-0.79	0.20	-0.64	0.23	-0.11	0.18	-0.26	0.17
b1291	JW1284	gene1316	sapD	292.33	58.24	-0.64	0.35	-1.19	0.11	-0.66	0.15	-0.89	0.28	-1.02	0.18	-0.48	0.20	-0.84	0.16	-0.51	0.18	-0.30	0.14	-0.33	0.14
b1292	JW1285	gene1317	sapC	87.00	18.45	-0.10	0.37	-1.04	0.20	-0.91	0.27	-1.21	0.38	-0.82	0.29	-0.75	0.31	-1.62	0.28	-0.60	0.28	-0.20	0.23	-0.21	0.26
b1293	JW1286	gene1318	sapB	250.33	41.72	-0.79	0.34	-1.63	0.10	-1.05	0.16	-1.32	0.34	-1.43	0.19	-1.29	0.21	-1.82	0.18	-1.42	0.22	-0.87	0.15	-0.84	0.17
b1294	JW1287	gene1319	sapA	451.33	71.09	-0.10	0.25	-0.94	0.08	-0.46	0.12	-0.79	0.32	-0.88	0.15	-0.83	0.18	-0.98	0.15	-0.64	0.19	-0.42	0.12	-0.47	0.13
b0137	JW0133	gene132	yadL	3.00	0.58	-0.12	0.80	0.17	0.61	-1.18	1.19	0.34	0.85	-0.57	1.00	0.74	0.76	1.58	0.66	2.08	0.59	1.11	0.61	0.46	0.46
b1295	JW1288	gene1320	ymjA	16.00	6.43	2.39	0.48	2.28	0.25	1.60	0.38	1.13	0.50	0.39	0.49	0.26	0.50	-0.90	0.50	-0.45	0.57	-0.09	0.43	0.15	0.32
b1296	JW1289	gene1321	puuP	51.00	6.66	1.46	0.49	-0.57	0.20	-1.79	0.36	-2.70	0.48	-3.54	0.46	-2.76	0.43	-1.28	0.31	-1.85	0.36	-1.59	0.31	-0.24	0.40
b1297	JW5201	gene1322	puuA	148.67	28.09	1.63	0.44	-1.65	0.16	-2.93	0.29	-1.74	0.50	-4.43	0.37	-4.39	0.42	-0.19	0.20	-1.35	0.26	-2.52	0.24	0.13	0.51
b1298	JW1291	gene1323	puuD	49.33	4.98	0.92	0.53	-2.57	0.24	-1.88	0.37	-0.83	0.49	-2.32	0.38	-2.10	0.38	0.05	0.25	-0.34	0.35	-0.75	0.28	0.72	0.41
b1299	JW1292	gene1324	puuR	55.33	13.17	0.68	0.42	-0.82	0.19	-0.87	0.32	-0.23	0.39	-1.03	0.32	-1.30	0.37	0.43	0.25	0.14	0.29	0.25	0.24	0.64	0.25
b1300	JW1293	gene1325	puuC	22.67	0.88	1.10	0.57	-2.01	0.34	-2.84	0.64	-2.90	0.63	-2.25	0.54	-1.99	0.52	0.20	0.35	-0.20	0.42	-0.57	0.37	0.33	0.37
b1301	JW1294	gene1326	puuB	14.67	4.67	0.89	0.59	-2.79	0.41	-2.90	0.82	-4.11	1.06	-2.49	0.69	-2.38	0.70	0.33	0.43	0.07	0.46	-0.84	0.49	0.40	0.42
b1302	JW1295	gene1327	puuE	20.33	2.91	0.83	0.49	-2.93	0.35	-4.13	0.89	-2.88	0.68	-2.99	0.63	-1.78	0.50	-0.15	0.38	-0.11	0.41	-0.44	0.39	0.43	0.36
b1303	JW1296	gene1328	pspF	31.33	7.97	-0.27	0.47	-1.36	0.24	0.33	0.33	0.73	0.34	0.83	0.31	1.10	0.33	1.86	0.24	1.74	0.28	0.97	0.26	0.66	0.23
b1304	JW1297	gene1329	pspA	343.00	57.77	-0.23	0.30	-0.49	0.12	-0.72	0.14	-0.84	0.31	-0.64	0.16	-0.20	0.19	0.21	0.14	0.05	0.18	0.63	0.13	0.91	0.16
b0138	JW0134	gene133	yadM	4.33	1.45	-1.40	0.79	0.00	0.54	-1.58	1.12	-0.65	0.88	-0.39	0.85	0.24	0.75	0.83	0.64	1.51	0.58	0.53	0.60	0.38	0.43
b1305	JW1298	gene1330	pspB	19.67	5.84	0.13	0.59	-0.52	0.28	-1.62	0.57	-1.03	0.52	-1.28	0.50	-0.72	0.47	-0.27	0.41	-0.48	0.44	0.22	0.38	0.71	0.28
b1306	JW1299	gene1331	pspC	39.00	4.93	-0.13	0.58	-1.23	0.22	-2.20	0.45	-1.64	0.43	-1.54	0.38	-1.50	0.40	-0.18	0.29	-0.11	0.32	0.01	0.28	0.50	0.23
b1307	JW1300	gene1332	pspD	5.67	0.33	0.82	0.70	0.43	0.44	-1.03	0.88	-2.40	1.03	-1.78	0.89	-0.79	0.78	-0.46	0.67	-0.42	0.68	0.19	0.57	1.76	0.38
b1308	JW1301	gene1333	pspE	69.67	10.68	0.56	0.30	-0.63	0.15	-0.16	0.24	1.51	0.51	2.90	0.22	4.42	0.25	3.38	0.21	2.18	0.20	2.13	0.18	0.92	0.29
b1309	JW1302	gene1334	ycjM	2.00	0.00	-0.01	0.81	0.95	0.68	1.49	0.94	4.25	0.89	4.03	0.65	3.81	0.65	2.75	0.66	2.01	0.68	0.51	0.72	-0.14	0.50
b1310	JW1303	gene1335	ycjN	2.67	1.20	-0.49	0.79	-1.30	0.76	-1.86	1.41	2.90	1.08	3.61	0.60	3.30	0.63	1.44	0.74	1.47	0.69	0.39	0.70	-0.31	0.49
b1311	JW1304	gene1336	ycjO	5.33	2.33	0.21	0.78	-4.79	1.03	-2.76	1.27	-0.67	1.09	0.16	0.75	-0.48	0.82	-0.33	0.72	-0.61	0.74	-0.22	0.63	-0.01	0.43
b1312	JW1305	gene1337	ycjP	7.00	1.15	-0.40	0.78	-1.87	0.50	-2.62	1.06	-0.31	0.82	0.51	0.59	0.12	0.59	0.07	0.58	-0.19	0.60	-0.47	0.58	0.32	0.39
b1313	JW1306	gene1338	ycjQ	4.67	1.20	1.65	0.64	0.14	0.53	-1.12	1.01	0.50	0.97	1.73	0.59	1.16	0.61	1.20	0.59	1.41	0.56	1.33	0.52	1.09	0.39
b1314	JW5202	gene1339	ycjR	5.33	0.88	-0.66	0.80	-0.79	0.51	-1.61	1.00	0.03	0.97	0.64	0.66	0.52	0.64	0.54	0.60	0.12	0.63	0.60	0.55	0.38	0.41
b0139	JW0135	gene134	htrE	0.67	0.33	0.73	0.75	4.41	0.94	3.53	1.14	2.76	1.13	2.21	1.26	3.03	1.02	2.04	1.02	1.58	0.91	1.30	0.78	0.93	0.51
b1315	JW1308	gene1340	ycjS	7.00	2.65	0.36	0.75	-0.44	0.43	-0.91	0.81	0.15	0.82	0.52	0.64	0.59	0.61	0.29	0.58	0.35	0.59	0.68	0.51	0.29	0.38
b1316	JW1309	gene1341	ycjT	10.67	2.33	0.43	0.65	-0.69	0.35	-1.41	0.70	-0.05	0.60	0.58	0.47	0.18	0.50	0.21	0.48	0.36	0.50	0.70	0.44	0.44	0.32
b1317	JW1310	gene1342	ycjU	1.33	0.88	0.01	0.74	-0.62	1.33	-0.46	1.60	-0.12	1.32	0.52	1.21	-0.48	1.32	-0.44	1.12	-0.29	0.97	-0.25	0.80	-0.02	0.51
-	-	gene1343	ycjV	2.00	0.58	-0.34	0.78	0.07	0.82	-0.60	1.26	0.28	1.06	-2.54	1.56	-0.14	1.02	-0.23	0.95	-0.56	0.92	-1.03	0.80	-0.27	0.50
b1319	JW1312	gene1344	ompG	0.00	0.00	NA	NA	3.05	2.08	3.59	2.30	3.04	2.00	4.45	1.95	2.79	1.62	1.30	1.21	0.41	0.69	NA	NA	0.42	0.39
b1320	JW1313	gene1345	ycjW	17.00	2.65	0.92	0.62	1.82	0.24	1.47	0.34	2.07	0.40	1.43	0.35	1.61	0.36	0.54	0.37	0.86	0.42	1.18	0.32	0.67	0.34
b1321	JW1314	gene1346	ycjX	230.67	39.70	-0.29	0.28	-1.92	0.22	-1.66	0.20	0.08	0.58	-0.55	0.19	-1.86	0.25	-1.30	0.21	-0.20	0.22	0.85	0.15	0.78	0.16
b1322	JW1315	gene1347	ycjF	74.67	15.76	0.33	0.37	-0.80	0.22	-1.52	0.31	-0.08	0.47	-0.15	0.27	-1.14	0.37	-1.06	0.27	0.11	0.31	1.08	0.19	1.31	0.20
b1323	JW1316	gene1348	tyrR	344.67	50.89	-0.04	0.22	0.79	0.08	0.64	0.12	0.31	0.22	0.60	0.15	0.83	0.18	0.78	0.13	0.80	0.16	0.34	0.12	0.29	0.13
b1324	JW1317	gene1349	tpx	1919.00	330.94	-1.38	0.21	-0.17	0.10	1.00	0.10	1.12	0.20	0.56	0.14	0.18	0.30	1.74	0.13	1.42	0.16	0.98	0.10	0.47	0.18
b0140	JW0136	gene135	yadV	0.00	0.00	NA	NA	4.43	1.99	3.81	2.28	4.20	1.91	2.26	2.20	NA	NA	0.48	1.01	0.81	0.85	0.51	0.59	0.20	0.29
b1325	JW1318	gene1350	ycjG	227.00	43.59	0.33	0.24	-1.32	0.11	-2.20	0.21	-2.03	0.33	-2.02	0.21	-1.45	0.22	-0.34	0.16	-0.38	0.19	-0.23	0.15	0.11	0.17
b1326	JW1319	gene1351	mpaA	230.33	37.49	0.58	0.30	-2.55	0.13	-2.77	0.22	-1.89	0.31	-1.81	0.21	-0.84	0.23	-0.53	0.18	-0.14	0.20	0.17	0.15	0.26	0.17
-	-	gene1352	ymjC	6.33	0.33	0.03	0.72	-1.53	0.50	-2.20	1.02	-1.91	0.92	-1.00	0.75	0.31	0.62	0.81	0.53	0.79	0.54	0.28	0.54	0.46	0.38
-	-	gene1353	ymjD	0.00	0.00	NA	NA	NA	NA	NA	NA	NA	NA	NA	NA	NA	NA	NA	NA	NA	NA	NA	NA	NA	NA
b1327	JW5804	gene1354	ycjY	114.00	22.12	-1.73	0.41	-4.38	0.21	-4.22	0.41	-4.45	0.48	-3.84	0.36	-2.43	0.40	-0.47	0.20	-0.09	0.23	-0.38	0.20	-0.26	0.19
b1328	JW1321	gene1355	pgrR	21.67	4.63	1.01	0.49	1.38	0.22	1.27	0.32	1.52	0.33	1.01	0.33	1.00	0.35	1.85	0.28	1.35	0.34	0.94	0.31	0.70	0.27
b1329	JW1322	gene1356	mppA	224.67	42.75	-0.07	0.26	0.10	0.10	0.17	0.15	1.00	0.39	1.17	0.18	1.06	0.27	0.95	0.16	0.82	0.17	0.34	0.14	0.29	0.20
b1330	JW1323	gene1357	ynaI	74.33	15.06	-0.89	0.53	0.54	0.17	1.15	0.20	0.45	0.36	0.93	0.23	1.19	0.25	0.88	0.21	0.73	0.23	0.70	0.19	-0.07	0.28
b0259	Null	gene1358	insH1	1.00	0.00	-0.19	0.72	1.30	0.94	1.18	1.28	0.92	1.24	1.41	1.17	2.00	0.98	1.66	0.93	1.15	0.88	-0.36	0.79	0.15	0.50
b1332	JW1326	gene1359	ynaJ	240.00	37.04	0.17	0.33	-1.22	0.17	-1.56	0.20	-1.28	0.31	-2.70	0.24	-2.37	0.28	-0.25	0.18	-0.61	0.23	-0.54	0.17	-0.10	0.23
b0141	JW0137	gene136	yadN	0.33	0.33	-0.12	0.49	3.78	1.25	2.87	1.55	2.18	1.52	1.57	1.73	-1.10	1.54	0.61	1.25	0.61	0.99	-0.08	0.64	-0.25	0.34
b1333	JW1327	gene1360	uspE	1427.33	221.22	-0.48	0.23	-3.00	0.07	-3.10	0.14	-2.48	0.33	-1.10	0.15	-0.46	0.15	1.25	0.14	1.12	0.15	0.55	0.10	0.41	0.15
b1334	JW1328	gene1361	fnr	1249.33	199.94	0.40	0.25	0.28	0.10	0.74	0.11	0.33	0.34	-0.77	0.15	-0.28	0.18	-0.77	0.14	-0.50	0.16	-0.10	0.12	0.05	0.16
b1335	JW1329	gene1362	ogt	16.00	1.53	2.11	0.55	1.17	0.26	0.06	0.45	0.81	0.39	1.32	0.35	0.37	0.41	0.38	0.38	0.36	0.39	0.34	0.37	0.42	0.28
b1336	JW5822	gene1363	abgT	16.33	3.53	-2.03	0.75	-1.91	0.37	-2.24	0.67	-0.87	0.56	-2.13	0.62	-1.52	0.58	-0.44	0.47	-0.24	0.47	-0.82	0.46	-0.44	0.34
b1337	JW1331	gene1364	abgB	22.33	5.81	-0.16	0.65	-3.30	0.34	-3.08	0.68	-2.53	0.59	-2.30	0.54	-1.73	0.52	-0.71	0.41	-0.58	0.41	-0.61	0.39	-0.71	0.28
b1338	JW5205	gene1365	abgA	17.33	4.26	-0.58	0.64	-4.10	0.44	-3.48	0.85	-2.80	0.74	-2.34	0.62	-3.23	0.74	-0.34	0.42	-0.23	0.43	-0.49	0.42	-0.11	0.29
b1339	JW1333	gene1366	abgR	44.00	6.56	-0.33	0.55	-1.99	0.23	-1.82	0.38	-0.05	0.60	-0.59	0.30	-0.65	0.32	0.75	0.25	0.27	0.29	0.26	0.25	-0.15	0.23
b1340	JW1334	gene1368	smrA	105.67	23.95	-0.39	0.40	-0.73	0.14	-0.71	0.23	-0.82	0.50	-1.34	0.26	-2.14	0.30	-1.09	0.23	-0.94	0.29	-0.60	0.21	-0.04	0.21
b1341	JW5206	gene1369	ydaM	259.00	54.29	-0.52	0.32	-4.75	0.18	-5.47	0.40	-3.81	0.40	-2.83	0.23	-1.13	0.33	0.38	0.16	1.26	0.22	1.06	0.14	0.52	0.20
b0142	JW0138	gene137	folK	14.33	4.37	0.08	0.62	2.88	0.27	2.83	0.32	2.89	0.38	1.94	0.36	2.30	0.50	-0.71	0.49	0.41	0.43	0.74	0.38	0.42	0.30
b1342	JW1336	gene1370	ydaN	280.67	52.42	-0.15	0.30	-3.03	0.13	-2.54	0.21	-2.13	0.26	-1.52	0.19	-0.74	0.37	0.55	0.15	0.71	0.22	0.07	0.15	0.07	0.17
b1343	JW1337	gene1372	dbpA	371.33	52.26	0.00	0.25	-0.69	0.10	-1.66	0.16	-2.55	0.38	-3.13	0.21	-2.34	0.33	-1.64	0.17	-0.50	0.23	0.43	0.13	0.41	0.16
b1344	JW1338	gene1373	ttcA	109.67	22.93	0.84	0.33	3.20	0.13	2.95	0.15	2.05	0.44	1.12	0.20	0.32	0.35	-0.29	0.20	-0.14	0.23	0.08	0.19	0.10	0.18
b1345	JW1339	gene1374	intR	30.00	8.00	0.02	0.60	1.50	0.20	1.81	0.27	1.11	0.46	-0.15	0.36	-0.82	0.43	-0.14	0.34	-0.20	0.36	0.07	0.32	-0.12	0.26
b1346	JW5207	gene1375	ydaQ	0.00	0.00	0.36	0.49	3.00	2.08	2.65	2.42	NA	NA	NA	NA	NA	NA	NA	NA	NA	NA	0.33	0.50	NA	NA
-	-	gene1376	rcbA	0.00	0.00	NA	NA	4.88	1.95	1.72	2.51	NA	NA	2.11	2.22	1.07	1.55	NA	NA	0.43	0.70	NA	NA	0.02	0.21
b1348	JW5208	gene1377	ralR	0.00	0.00	NA	NA	4.12	2.01	3.23	2.35	2.41	2.07	1.39	2.22	1.88	1.65	0.48	1.01	NA	NA	NA	NA	0.17	0.27
b1349	JW1343	gene1378	recT	9.33	1.76	0.84	0.67	0.28	0.34	-0.66	0.66	-0.21	0.57	-0.30	0.57	0.26	0.51	0.70	0.46	1.04	0.46	0.43	0.46	0.27	0.35
b1350	JW1344	gene1379	recE	20.33	3.93	0.52	0.50	0.32	0.28	-0.86	0.47	-0.66	0.46	-0.99	0.47	-0.77	0.43	-0.40	0.40	0.37	0.39	0.27	0.34	-0.10	0.27
b0143	JW5808	gene138	pcnB	311.00	68.70	0.80	0.26	2.04	0.13	2.07	0.13	1.51	0.36	1.38	0.19	0.92	0.34	-0.96	0.17	0.02	0.21	0.36	0.15	0.30	0.18
b1351	JW1345	gene1380	racC	1.00	0.58	-0.39	0.60	1.38	0.91	-0.61	1.71	-1.39	1.75	-1.64	1.79	-0.55	1.39	-0.13	1.16	1.25	0.88	0.22	0.80	0.14	0.51
b4526	JW1346	gene1381	ydaE	0.33	0.33	0.06	0.54	0.18	1.68	-0.14	2.25	-1.58	2.07	-2.00	2.23	-0.15	1.64	-0.26	1.25	0.61	0.98	0.14	0.73	-0.22	0.37
b1352	JW1347	gene1382	kilR	0.33	0.33	0.25	0.58	0.66	1.50	-0.08	2.33	0.05	2.02	-1.70	2.22	-1.10	1.54	0.55	1.26	0.59	0.98	0.44	0.76	0.17	0.45
b1353	JW5209	gene1383	sieB	4.33	0.67	-0.91	0.81	-1.01	0.67	0.05	0.83	0.23	0.89	0.46	0.74	1.90	0.57	0.89	0.62	1.04	0.60	1.44	0.52	0.47	0.42
b4527	JW1349	gene1384	ydaF	0.33	0.33	1.27	0.79	3.17	1.27	0.76	2.08	1.23	1.76	0.43	2.02	-1.10	1.54	0.17	1.26	0.59	0.98	0.66	0.78	0.26	0.46
b1355	JW5210	gene1385	ydaG	1.33	0.33	1.60	0.78	1.71	0.78	-0.96	1.58	-0.43	1.34	-2.00	1.67	-0.88	1.35	-0.68	1.13	-0.44	0.96	-0.38	0.80	-0.07	0.51
b1356	JW1351	gene1386	racR	86.00	12.34	1.83	0.50	1.86	0.12	0.77	0.20	0.73	0.23	0.43	0.27	1.22	0.23	1.23	0.18	0.97	0.22	0.33	0.20	-0.28	0.23
b1357	JW1352	gene1387	ydaS	8.00	2.89	0.31	0.71	-1.18	0.48	-2.76	1.05	-1.35	0.78	-1.47	0.84	-1.14	0.74	0.07	0.56	-0.13	0.59	-0.31	0.56	-0.08	0.39
b1358	JW1353	gene1388	ydaT	7.00	0.58	0.19	0.70	-1.83	0.47	-3.18	1.16	-2.32	0.91	-2.05	0.88	-2.29	0.87	-0.67	0.63	-0.14	0.62	-0.89	0.61	0.18	0.38
b1359	JW1354	gene1389	ydaU	17.00	3.51	0.04	0.64	-1.12	0.32	-1.84	0.62	-2.61	0.68	-2.03	0.58	-2.31	0.62	-0.45	0.42	-0.48	0.44	-0.42	0.42	-0.22	0.30
b0144	JW5892	gene139	gluQ	58.33	8.01	0.23	0.35	1.29	0.18	0.85	0.22	0.95	0.29	0.71	0.23	-0.89	0.30	-0.87	0.27	-1.06	0.35	-0.30	0.24	-0.17	0.23
b1360	JW1355	gene1390	ydaV	7.00	1.53	0.90	0.62	-0.98	0.45	-2.22	1.00	-2.29	0.95	-2.01	0.86	-1.98	0.83	-0.48	0.62	-0.88	0.66	-0.01	0.55	0.31	0.39
-	-	gene1391	ydaW	9.67	2.91	0.03	0.68	-1.54	0.40	-2.65	0.95	-1.47	0.75	-1.90	0.74	-0.95	0.63	-0.61	0.56	-0.27	0.54	-0.50	0.53	-0.39	0.36
-	-	gene1392	rzpR	1.67	1.20	-0.52	0.64	-1.82	1.07	-3.82	2.27	-1.85	1.70	-3.85	2.08	-1.08	1.36	-1.61	1.21	-1.21	0.99	-0.29	0.80	-0.11	0.51
b4528	JW5213	gene1393	rzoR	0.00	0.00	NA	NA	NA	NA	NA	NA	NA	NA	NA	NA	NA	NA	NA	NA	NA	NA	NA	NA	NA	NA
b1363	JW1358	gene1394	trkG	49.67	11.70	-0.97	0.49	1.33	0.21	0.43	0.28	0.43	0.38	-0.27	0.31	-0.41	0.37	-1.47	0.33	-1.20	0.38	-0.66	0.29	-0.71	0.24
b1365	JW1359	gene1395	ynaK	0.33	0.33	0.33	0.62	4.19	1.23	0.03	2.20	1.83	1.53	1.54	1.64	-0.15	1.64	0.34	1.26	-0.61	0.77	-0.14	0.67	0.44	0.49
-	-	gene1396	ydaY	0.67	0.67	1.06	0.78	3.28	0.98	1.85	1.47	1.69	1.40	1.78	1.37	-1.55	1.62	0.54	1.20	0.83	0.99	-0.27	0.70	0.26	0.48
-	-	gene1397	tmpR	3.67	1.45	1.19	0.73	1.51	0.50	-0.12	0.95	0.66	0.78	0.64	0.79	0.39	0.78	1.06	0.66	0.19	0.74	-0.17	0.70	-0.36	0.48
-	-	gene1398	lomR	2.00	0.58	-0.16	0.79	-0.02	0.73	-2.36	1.68	-1.03	1.27	-1.31	1.31	-1.47	1.24	-0.50	1.00	0.10	0.85	-0.41	0.78	-0.12	0.50
b0259	Null	gene1399	insH1	33.67	4.06	0.78	0.39	-1.56	0.22	-1.48	0.41	-1.48	0.42	-0.53	0.33	0.59	0.30	-0.19	0.30	-0.15	0.32	0.34	0.28	-0.06	0.22
b0016	Null	gene14	insL1	68.00	12.58	-0.25	0.39	0.33	0.25	0.14	0.24	0.51	0.40	-0.39	0.27	-1.70	0.40	-2.09	0.30	-0.97	0.29	-0.29	0.24	-0.24	0.23
b0145	JW0141	gene140	dksA	1195.33	223.30	-0.22	0.27	0.36	0.13	0.90	0.13	1.59	0.26	1.34	0.17	0.84	0.24	1.11	0.15	0.86	0.20	0.49	0.12	0.32	0.17
b1372	JW1366	gene1400	stfR	25.33	0.67	0.39	0.48	-1.44	0.29	-2.83	0.61	-2.03	0.52	-1.93	0.48	-1.23	0.45	0.34	0.32	-0.24	0.38	-0.11	0.34	0.14	0.26
b1373	JW1367	gene1401	tfaR	2.00	0.58	0.11	0.80	-0.27	0.82	-0.75	1.37	-0.86	1.25	-4.16	2.02	-1.37	1.28	-0.39	1.01	0.29	0.85	0.45	0.73	-0.09	0.50
b1374	JW1368	gene1402	pinR	2.33	1.20	1.49	0.80	1.80	0.60	-0.57	1.33	0.03	1.09	0.12	1.06	0.31	0.99	0.79	0.84	0.59	0.83	0.33	0.74	0.21	0.49
b1375	JW1369	gene1403	ynaE	0.67	0.33	5.61	0.68	5.07	0.93	1.04	1.63	1.19	1.36	0.33	1.66	-1.92	1.65	-0.13	1.24	-0.04	0.99	0.31	0.79	0.22	0.50
-	-	gene1404	ttcC	0.00	0.00	2.85	0.80	6.43	1.83	5.33	2.07	4.67	1.84	3.20	2.10	3.26	1.58	2.84	1.23	2.57	0.98	1.54	0.79	1.11	0.50
b1376	JW1370	gene1405	uspF	433.67	100.18	-1.72	0.31	-5.66	0.20	-5.22	0.30	-2.83	0.62	-0.92	0.18	0.51	0.20	2.87	0.18	2.81	0.18	2.21	0.13	1.47	0.25
b1377	JW1371	gene1406	ompN	3.00	0.58	0.21	0.81	0.47	0.58	0.09	1.02	-0.21	0.95	-1.45	1.16	-0.45	0.90	-0.67	0.88	-0.47	0.83	-0.63	0.74	-0.52	0.49
b1378	JW1372	gene1408	pfo	4965.33	765.50	-1.01	0.27	-2.96	0.07	-2.11	0.10	-2.69	0.43	-3.25	0.13	-2.49	0.20	-1.41	0.11	-1.01	0.15	-0.90	0.10	-0.62	0.12
b4529	JW5215	gene1409	ydbJ	267.67	48.39	0.93	0.23	-2.65	0.16	-2.72	0.20	-1.45	0.32	-0.92	0.18	-0.60	0.20	-0.50	0.16	-0.31	0.18	0.56	0.13	0.27	0.14
b0146	JW0142	gene141	sfsA	372.00	62.18	0.52	0.32	-0.99	0.10	-2.46	0.17	-1.95	0.25	-1.94	0.18	-1.19	0.29	0.40	0.15	0.18	0.22	-0.48	0.13	0.17	0.18
b1379	JW1374	gene1410	hslJ	126.00	25.17	-0.49	0.33	-0.01	0.17	0.20	0.20	-0.48	0.65	-2.22	0.27	-2.35	0.39	-0.53	0.21	-0.71	0.25	-0.75	0.20	-0.58	0.21
b1380	JW1375	gene1411	ldhA	268.67	61.19	-0.66	0.42	-1.69	0.14	-0.45	0.21	-0.35	0.48	-0.87	0.20	-0.83	0.28	-0.29	0.19	0.03	0.21	-0.06	0.17	0.19	0.18
b1381	JW1376	gene1412	ydbH	195.33	31.18	-0.57	0.32	-0.48	0.12	-0.23	0.16	-0.51	0.28	-0.34	0.18	0.09	0.19	-0.31	0.16	-0.30	0.18	-0.26	0.15	-0.36	0.15
b1382	JW1377	gene1413	ynbE	1.67	0.67	-0.71	0.71	0.54	0.78	-1.20	1.54	-1.21	1.38	-0.31	1.22	0.67	0.98	0.46	0.95	-1.26	0.99	-0.17	0.79	-0.44	0.51
b1383	JW5216	gene1414	ydbL	2.67	1.20	1.21	0.77	3.35	0.53	2.00	0.77	2.71	0.74	2.73	0.66	2.51	0.66	2.40	0.62	1.43	0.69	1.51	0.61	0.75	0.46
b1384	JW1379	gene1415	feaR	91.00	15.28	0.13	0.31	-3.52	0.18	-4.27	0.46	0.24	0.80	-2.52	0.32	-2.16	0.31	0.75	0.19	0.21	0.22	0.33	0.19	0.19	0.20
b1385	JW1380	gene1416	feaB	124.67	22.81	-0.29	0.30	-2.21	0.15	-2.78	0.29	-2.32	0.32	-2.85	0.28	-2.19	0.31	0.09	0.19	0.15	0.21	0.11	0.17	0.32	0.16
b1386	JW1381	gene1417	tynA	30.67	3.53	0.94	0.39	-1.53	0.27	-2.06	0.49	-1.25	0.41	-1.58	0.40	-1.41	0.40	-0.38	0.32	-0.39	0.34	-0.29	0.31	-0.10	0.23
b1387	JW1382	gene1418	paaZ	10.33	1.76	1.13	0.64	-1.74	0.41	-2.44	0.85	-1.25	0.68	-1.51	0.66	-1.59	0.70	-0.12	0.50	-0.63	0.55	-0.74	0.54	-0.03	0.39
b1388	JW1383	gene1419	paaA	27.67	5.55	2.14	0.66	-5.21	0.41	-5.04	0.99	0.28	0.89	-3.16	0.57	-4.19	0.74	-0.46	0.35	-1.27	0.40	-1.69	0.40	-0.29	0.45
b0147	JW5011	gene142	ligT	13.33	1.67	2.07	0.48	2.06	0.27	1.50	0.39	1.34	0.43	1.13	0.39	1.10	0.41	0.12	0.43	0.40	0.45	0.48	0.41	0.37	0.30
b1389	JW1384	gene1420	paaB	5.67	0.67	0.93	0.78	-4.78	0.80	-5.54	2.05	0.06	0.94	-2.30	0.99	-2.82	1.05	-0.53	0.71	-1.39	0.76	-1.91	0.73	-0.30	0.45
b1390	JW1385	gene1421	paaC	23.00	6.03	1.85	0.72	-5.09	0.46	-3.89	0.81	-0.22	0.86	-2.78	0.59	-3.65	0.74	-0.79	0.42	-1.30	0.47	-2.13	0.47	-0.63	0.40
b1391	JW5217	gene1422	paaD	5.33	2.60	2.84	0.72	-3.59	0.77	-3.49	1.47	0.33	1.09	-0.79	0.85	-1.58	0.96	-0.40	0.73	-0.19	0.71	-0.72	0.68	0.11	0.47
b1392	JW1387	gene1423	paaE	24.67	6.33	1.35	0.65	-4.06	0.36	-3.96	0.80	-0.64	0.92	-2.30	0.53	-2.67	0.60	-0.96	0.39	-1.33	0.43	-0.96	0.39	-0.30	0.33
b1393	JW1388	gene1424	paaF	12.00	4.16	1.84	0.75	-3.93	0.51	-3.29	0.98	-0.83	0.78	-2.41	0.79	-3.77	0.98	-0.73	0.54	-0.96	0.58	-0.97	0.53	-0.61	0.37
b1394	JW1389	gene1425	paaG	7.67	1.20	0.84	0.66	-2.62	0.51	-3.26	1.14	-0.86	0.82	-1.13	0.72	-2.43	0.93	-1.05	0.65	-0.64	0.62	-0.54	0.57	-0.28	0.40
b1395	JW1390	gene1426	paaH	21.33	4.91	1.53	0.64	-2.04	0.30	-2.34	0.63	-1.51	0.69	-2.36	0.55	-2.66	0.61	-0.29	0.39	-0.32	0.42	-0.82	0.40	0.08	0.29
b1396	JW1391	gene1427	paaI	8.00	1.00	-0.19	0.74	-2.46	0.54	-1.09	0.74	-2.53	0.96	-2.07	0.84	-2.87	0.94	-0.17	0.56	-1.21	0.66	-1.21	0.61	-0.21	0.38
b1397	JW1392	gene1428	paaJ	95.00	8.54	1.10	0.46	-3.16	0.17	-4.27	0.45	-1.58	0.53	-2.39	0.33	-2.94	0.36	-0.51	0.22	-1.02	0.26	-1.06	0.23	-0.24	0.31
b1398	JW5218	gene1429	paaK	194.33	35.89	0.20	0.40	-3.97	0.17	-4.22	0.32	-1.97	0.56	-3.52	0.26	-3.76	0.31	-0.97	0.18	-1.50	0.21	-1.62	0.18	-0.61	0.27
b0148	JW0144	gene143	hrpB	286.67	54.57	0.51	0.23	0.30	0.12	-0.51	0.16	-0.92	0.31	-0.81	0.20	-0.26	0.22	-0.84	0.17	-0.70	0.20	-0.40	0.15	-0.22	0.17
b1399	JW1394	gene1430	paaX	201.00	24.64	-0.55	0.28	-2.61	0.14	-2.41	0.23	-1.80	0.26	-2.26	0.23	-1.44	0.36	0.48	0.16	0.25	0.19	0.06	0.16	0.36	0.15
b1400	JW1395	gene1431	paaY	82.67	9.35	0.06	0.42	-1.46	0.16	-1.34	0.27	-0.78	0.31	-1.29	0.27	-0.64	0.34	1.01	0.19	0.96	0.22	0.71	0.20	0.89	0.18
b4674	Null	gene1432	ynbG	0.00	0.00	NA	NA	NA	NA	NA	NA	NA	NA	NA	NA	NA	NA	NA	NA	NA	NA	NA	NA	NA	NA
-	-	gene1433	ydbA	221.33	24.22	0.26	0.25	0.13	0.11	-0.62	0.17	-0.66	0.28	-0.60	0.19	-0.51	0.21	-0.08	0.16	-0.27	0.19	-0.20	0.16	-0.15	0.18
b0361	Null	gene1434	insD1	5.67	0.88	-0.63	0.79	-1.94	0.56	-1.64	0.96	-1.46	0.86	-3.12	1.16	-1.98	0.90	-0.43	0.67	-1.26	0.76	-0.62	0.63	-0.84	0.44
b0360	Null	gene1435	insC1	0.00	0.00	NA	NA	0.42	2.35	NA	NA	NA	NA	1.30	2.22	NA	NA	1.36	1.22	0.41	0.69	NA	NA	0.26	0.33
b0256	Null	gene1436	insI1	0.33	0.33	-0.15	0.50	2.41	1.41	1.09	1.92	0.91	1.92	1.56	1.63	1.42	1.47	2.19	1.10	0.26	0.97	0.79	0.80	-0.29	0.32
-	-	gene1437	ydbC	153.67	37.24	0.33	0.35	-4.07	0.18	-5.22	0.47	-3.26	0.53	-1.87	0.24	-0.69	0.31	-0.26	0.19	0.10	0.28	0.15	0.17	0.41	0.20
b1407	JW5221	gene1438	ydbD	4.00	1.00	1.14	0.74	1.75	0.47	0.52	0.80	0.71	0.74	0.00	0.83	0.98	0.68	0.81	0.65	0.89	0.64	0.77	0.59	0.71	0.44
b1408	JW1405	gene1439	ynbA	0.67	0.67	0.26	0.66	0.02	1.18	-2.86	2.41	-0.84	1.94	-1.24	1.93	-1.97	1.65	-0.46	1.24	-1.02	0.89	-0.47	0.74	-0.40	0.43
b0149	JW0145	gene144	mrcB	501.00	78.77	-0.38	0.24	0.85	0.09	0.20	0.12	-0.35	0.26	-0.40	0.15	-0.39	0.18	-0.89	0.14	-0.74	0.18	-0.48	0.13	-0.29	0.14
b1409	JW1406	gene1440	ynbB	0.33	0.33	-0.12	0.49	0.74	1.49	0.76	2.08	1.17	1.76	-1.70	2.22	-1.10	1.54	0.55	1.26	-0.01	0.90	-0.04	0.66	-0.21	0.32
b1410	JW1407	gene1441	ynbC	16.33	0.33	0.27	0.57	-0.38	0.29	-1.04	0.56	-1.20	0.56	-1.43	0.53	-0.55	0.55	0.08	0.41	-0.35	0.44	-0.18	0.40	-0.05	0.29
b1411	JW1408	gene1442	ynbD	31.67	0.67	0.16	0.50	-1.36	0.25	-1.77	0.44	-1.53	0.44	-1.66	0.41	-1.45	0.41	-0.62	0.33	-0.44	0.40	-0.40	0.32	-0.01	0.26
b1412	JW1409	gene1443	azoR	49.67	11.57	0.48	0.42	0.80	0.17	0.60	0.25	0.59	0.37	0.90	0.25	0.96	0.28	0.49	0.24	0.85	0.26	0.79	0.22	0.13	0.21
b1413	JW5905	gene1444	hrpA	1118.00	213.85	-0.84	0.23	-0.85	0.10	-0.68	0.12	-1.07	0.29	-0.89	0.15	-0.50	0.17	-0.51	0.13	-0.29	0.16	-0.07	0.12	0.14	0.14
b1414	JW1411	gene1445	ydcF	454.00	72.27	-0.98	0.26	-2.17	0.11	-2.22	0.16	-1.87	0.24	-1.80	0.17	-1.71	0.23	-1.59	0.16	-1.33	0.21	-0.68	0.13	-0.54	0.16
b1415	JW1412	gene1446	aldA	5283.33	1022.16	-0.44	0.40	-6.31	0.12	-6.94	0.18	-0.82	0.95	-4.02	0.19	-4.67	0.48	0.00	0.16	-0.59	0.16	-1.25	0.12	-0.25	0.32
-	-	gene1447	gapC	451.00	63.58	2.60	0.18	-0.44	0.08	-0.93	0.13	-0.89	0.20	-0.25	0.19	0.74	0.23	1.03	0.13	1.33	0.20	1.29	0.12	0.85	0.15
b1418	JW5224	gene1448	cybB	60.33	7.22	0.67	0.34	1.63	0.16	2.06	0.18	2.33	0.24	1.96	0.20	1.45	0.34	1.86	0.21	1.63	0.22	1.29	0.20	0.62	0.23
b0150	JW0146	gene145	fhuA	2486.67	425.44	-0.50	0.41	0.70	0.17	0.81	0.11	-0.81	0.54	-5.55	0.18	-4.89	0.22	-4.26	0.15	-4.61	0.21	-4.65	0.14	-3.50	0.22
b1419	JW1416	gene1450	ydcA	48.00	6.08	-0.68	0.44	0.36	0.20	0.01	0.27	0.41	0.28	0.53	0.28	1.10	0.26	1.89	0.21	0.99	0.33	0.94	0.22	0.04	0.30
b4428	JW5225	gene1451	hokB	2.00	1.15	-0.71	0.69	-4.37	1.34	-2.43	1.72	-2.31	1.65	-2.62	1.61	-0.20	1.10	1.21	0.80	-0.51	0.94	-0.62	0.79	0.11	0.51
b1420	JW5882	gene1452	mokB	9.00	2.31	-1.58	0.79	-3.56	0.59	-2.42	0.92	-1.83	0.90	-2.72	0.87	-0.45	0.63	1.29	0.48	-0.29	0.58	-0.33	0.53	-0.52	0.48
b1421	JW1417	gene1454	trg	23.67	2.19	0.83	0.45	0.26	0.27	-0.98	0.44	-1.30	0.46	-1.04	0.42	-1.02	0.42	0.38	0.33	0.14	0.35	0.12	0.33	0.20	0.25
b1422	JW5226	gene1455	ydcI	268.67	59.99	0.09	0.33	-2.21	0.21	-2.54	0.23	0.70	0.75	-4.26	0.31	-4.51	0.37	-0.06	0.18	-0.58	0.22	-0.98	0.18	-0.05	0.36
b1423	JW1419	gene1456	ydcJ	2231.67	369.55	-0.91	0.32	-8.19	0.16	-8.20	0.33	-6.63	0.39	-6.29	0.22	-3.82	0.44	-1.45	0.13	-1.43	0.18	-1.06	0.12	-0.84	0.15
b1424	JW1420	gene1457	opgD	439.67	72.78	-0.23	0.26	-0.29	0.13	-0.76	0.14	-0.46	0.32	-0.31	0.16	-0.58	0.28	-1.10	0.15	-0.76	0.19	-0.09	0.13	-0.24	0.16
b1426	JW5823	gene1458	ydcH	247.67	30.90	-1.19	0.28	-2.19	0.12	-4.37	0.30	-3.38	0.43	-1.60	0.20	0.21	0.20	1.98	0.17	1.04	0.26	0.47	0.16	-0.15	0.26
b1427	JW1423	gene1459	rimL	82.33	16.23	0.28	0.38	-0.69	0.17	-1.31	0.28	-0.72	0.31	-0.70	0.27	0.32	0.27	0.14	0.22	-0.12	0.26	0.26	0.20	-0.02	0.20
b0151	JW0147	gene146	fhuC	84.00	15.50	1.14	0.52	1.34	0.17	0.56	0.20	-0.84	0.50	-2.90	0.34	-2.47	0.36	-3.23	0.33	-2.81	0.33	-2.89	0.31	-1.95	0.22
b1428	JW1424	gene1460	ydcK	383.67	54.11	-0.42	0.41	-6.51	0.18	-6.59	0.45	-5.74	0.41	-5.04	0.28	-2.65	0.48	-0.15	0.15	-0.11	0.21	-0.44	0.15	-0.14	0.18
b1429	JW1425	gene1461	tehA	45.00	9.29	0.85	0.34	-0.24	0.18	-0.51	0.31	-0.68	0.36	-0.59	0.32	-0.24	0.34	0.31	0.25	0.06	0.30	-0.26	0.27	0.18	0.21
b1430	JW1426	gene1462	tehB	61.67	7.31	-0.50	0.44	0.89	0.16	0.62	0.22	0.52	0.27	0.69	0.23	1.26	0.24	1.08	0.21	0.97	0.26	0.74	0.20	0.47	0.21
b1431	JW1427	gene1463	ydcL	716.33	163.73	-0.21	0.46	-2.01	0.20	-3.09	0.21	-2.26	0.40	-1.80	0.22	-1.18	0.27	-0.76	0.19	-0.56	0.26	-0.65	0.17	-0.30	0.26
-	-	gene1464	insP	2.33	1.45	-0.60	0.74	-1.03	0.91	-1.13	1.38	-1.20	1.41	-2.02	1.41	-0.62	1.11	-0.67	0.98	-1.30	0.96	-0.31	0.77	-0.32	0.51
b1432	JW5228	gene1465	insQ	113.33	16.60	1.15	0.30	-0.19	0.13	-0.59	0.21	-0.27	0.23	-0.40	0.21	0.43	0.21	0.37	0.19	0.45	0.20	0.50	0.17	-0.03	0.21
b1433	JW5229	gene1466	ydcO	20.67	0.88	-0.13	0.60	-2.20	0.32	-1.17	0.49	0.35	0.59	0.53	0.37	0.45	0.38	-0.22	0.37	-0.61	0.42	-0.19	0.36	-0.36	0.29
b1434	JW1430	gene1467	ydcN	11.33	1.20	0.69	0.57	1.39	0.29	1.72	0.41	1.58	0.44	1.12	0.42	1.02	0.42	0.62	0.43	0.06	0.50	0.49	0.42	0.30	0.31
b1435	JW1431	gene1468	ydcP	287.00	51.73	-0.08	0.28	1.41	0.11	0.79	0.13	0.18	0.33	0.06	0.16	-0.19	0.47	-2.01	0.18	-1.67	0.20	-0.67	0.15	-0.43	0.15
b1436	JW1432	gene1469	yncJ	18.33	2.85	-0.75	0.66	-2.19	0.33	-4.51	1.03	-3.34	0.76	-3.21	0.69	-2.44	0.61	-1.48	0.47	-1.51	0.49	-0.97	0.43	-0.31	0.35
b0152	JW0148	gene147	fhuD	84.33	10.27	0.19	0.48	1.24	0.18	1.19	0.18	-0.34	0.68	-2.97	0.33	-2.36	0.32	-2.95	0.31	-2.54	0.33	-2.51	0.30	-2.42	0.21
b4532	JW5230	gene1470	hicA	10.33	2.73	0.04	0.70	-0.55	0.37	-1.05	0.68	-0.74	0.61	-0.77	0.60	0.13	0.51	-0.02	0.50	0.19	0.50	-0.17	0.49	0.02	0.34
b1438	JW1433	gene1471	hicB	44.33	6.17	-0.17	0.44	-0.73	0.23	-1.42	0.37	-0.89	0.40	-0.60	0.32	0.05	0.37	-0.59	0.30	-0.22	0.31	0.20	0.26	0.00	0.25
b1439	JW1434	gene1472	ydcR	62.67	11.39	0.77	0.36	0.86	0.17	0.59	0.24	0.94	0.28	-0.36	0.27	-0.45	0.31	0.04	0.24	0.71	0.25	0.71	0.21	0.55	0.20
b1440	JW1435	gene1473	ydcS	1145.33	171.77	-0.44	0.32	-6.72	0.13	-7.01	0.31	-6.77	0.43	-5.04	0.21	-2.51	0.45	0.37	0.12	0.20	0.16	-0.13	0.11	-0.08	0.15
b1441	JW1436	gene1474	ydcT	295.00	35.92	-0.35	0.31	-6.52	0.20	-6.21	0.45	-5.85	0.46	-5.05	0.31	-2.74	0.36	-0.21	0.15	0.26	0.24	-0.06	0.14	-0.10	0.17
b1442	JW1437	gene1475	ydcU	116.67	20.95	0.34	0.36	-4.69	0.23	-4.87	0.49	-5.75	0.65	-4.27	0.39	-2.46	0.37	-0.57	0.21	-0.10	0.29	-0.16	0.20	-0.04	0.20
b1443	JW1438	gene1476	ydcV	159.33	36.09	-0.36	0.34	-6.08	0.25	-5.52	1.01	-5.34	0.55	-4.57	0.37	-2.47	0.45	-0.63	0.20	0.62	0.26	0.52	0.17	0.25	0.19
b1444	JW1439	gene1477	patD	509.00	92.81	0.06	0.40	-5.72	0.16	-6.29	0.36	-6.25	0.43	-4.97	0.25	-2.49	0.35	-0.70	0.14	0.99	0.26	0.79	0.12	0.92	0.15
b4598	Null	gene1478	yncL	73.00	1.00	-1.22	0.44	-4.42	0.28	-3.65	0.44	-3.81	0.54	-2.80	0.36	-1.46	0.37	-0.17	0.24	-0.49	0.29	0.04	0.24	0.60	0.37
b1445	JW5232	gene1479	ydcX	8.00	2.08	2.02	0.72	3.48	0.32	2.22	0.44	1.50	1.05	-2.43	0.90	-0.63	0.68	-0.33	0.60	-0.18	0.58	-1.01	0.61	-0.49	0.39
b0153	JW0149	gene148	fhuB	40.33	7.84	1.42	0.48	2.59	0.22	1.65	0.25	0.20	0.73	-1.53	0.39	-1.33	0.37	-2.35	0.39	-1.93	0.40	-1.84	0.37	-1.45	0.32
b1446	JW1441	gene1480	ydcY	227.00	30.29	-0.78	0.44	-0.68	0.11	-0.44	0.15	-0.33	0.31	-0.28	0.19	-0.26	0.19	0.73	0.15	0.38	0.21	0.30	0.14	-0.14	0.15
b1447	JW1442	gene1481	ydcZ	14.33	2.96	0.94	0.53	-0.20	0.30	-0.42	0.54	0.12	0.54	-0.47	0.49	-1.03	0.57	-0.35	0.46	-0.61	0.51	0.33	0.40	0.21	0.32
b1448	JW5233	gene1482	mnaT	49.67	9.21	0.98	0.33	-0.82	0.18	-1.36	0.33	-0.13	0.37	-0.14	0.28	0.25	0.29	0.67	0.23	0.48	0.27	0.11	0.25	0.33	0.20
b1449	JW5907	gene1483	curA	554.33	125.37	-0.62	0.33	-6.05	0.22	-6.32	0.38	-5.73	0.44	-4.82	0.30	-3.59	0.38	-2.00	0.20	-1.41	0.23	-1.22	0.18	-0.09	0.26
b1450	JW1445	gene1484	mcbR	66.33	13.59	-0.30	0.41	-2.47	0.22	-3.24	0.44	-2.91	0.46	-3.82	0.46	-2.11	0.62	-0.04	0.26	0.34	0.28	-0.44	0.25	0.13	0.33
b1451	JW1446	gene1485	yncD	215.33	35.78	-0.84	0.27	0.54	0.10	0.85	0.14	0.85	0.31	-2.97	0.27	-3.91	0.31	-1.46	0.18	-1.11	0.20	-0.68	0.16	-0.77	0.17
b1452	JW1447	gene1486	yncE	419.67	70.49	0.03	0.42	0.03	0.15	1.33	0.16	0.63	0.48	-3.04	0.24	-4.46	0.34	-2.81	0.19	-3.32	0.24	-3.30	0.19	-2.55	0.28
b1453	JW5234	gene1487	ansP	17.67	5.61	0.80	0.64	2.90	0.24	3.83	0.26	3.12	0.69	1.50	0.36	0.38	0.46	-0.32	0.43	-0.24	0.47	0.20	0.38	0.00	0.31
b1454	JW1449	gene1488	yncG	99.33	18.80	0.27	0.34	-5.22	0.25	-6.86	0.93	-6.02	0.73	-5.00	0.49	-2.60	0.47	-0.95	0.23	-0.62	0.24	-0.06	0.19	0.39	0.19
b1455	JW5235	gene1489	yncH	0.67	0.67	-0.22	0.51	-2.70	1.80	-2.55	2.45	-2.07	2.09	-2.61	2.21	-0.61	1.62	-0.30	1.25	-0.86	0.85	-0.68	0.64	-0.56	0.37
b0154	JW0150	gene149	hemL	484.00	69.96	0.19	0.26	0.97	0.11	1.50	0.12	1.07	0.28	1.01	0.18	0.89	0.19	-0.29	0.15	-0.05	0.17	-0.10	0.13	-0.25	0.15
-	-	gene1490	rhsE	4.00	1.15	1.79	0.66	0.87	0.50	-0.98	1.05	-0.18	0.84	-0.61	0.89	-0.04	0.79	-0.66	0.80	-0.42	0.76	-0.58	0.70	-0.02	0.46
b1457	JW1452	gene1491	ydcD	1.00	0.58	-0.14	0.67	2.20	0.87	0.40	1.56	0.39	1.34	0.41	1.40	0.36	1.33	0.93	1.04	-0.67	0.99	-0.11	0.80	-0.22	0.50
-	-	gene1492	yncI	1.00	0.58	1.78	0.79	3.88	0.82	1.73	1.24	2.01	1.07	1.23	1.25	1.07	1.14	0.94	1.04	1.22	0.90	1.05	0.77	0.62	0.51
b1460	JW1455	gene1493	ydcC	1.33	0.88	-0.21	0.68	1.21	0.82	-0.08	1.56	0.81	1.43	0.84	1.29	0.92	1.09	1.86	0.87	1.16	0.86	0.41	0.79	0.41	0.51
b1461	JW1456	gene1494	pptA	51.67	11.29	-1.64	0.50	-2.34	0.20	-1.27	0.33	-0.70	0.34	-0.17	0.28	0.58	0.28	1.12	0.22	1.04	0.25	1.22	0.22	0.38	0.21
b1462	JW1457	gene1495	yddH	66.33	8.99	-1.39	0.54	-5.67	0.30	-5.44	0.73	-4.40	0.56	-3.83	0.43	-1.58	0.34	-0.29	0.24	-0.31	0.26	-0.15	0.23	0.35	0.19
b1463	JW1458	gene1496	nhoA	38.67	7.51	0.48	0.50	-2.61	0.23	-3.41	0.56	-2.73	0.49	-2.67	0.44	-2.23	0.42	-1.03	0.32	-0.72	0.36	-0.94	0.31	-0.44	0.28
b1464	JW1459	gene1497	yddE	190.67	36.04	0.54	0.27	-1.26	0.11	-1.45	0.20	-1.24	0.25	-0.98	0.20	-0.79	0.21	-0.86	0.18	-0.68	0.20	-0.19	0.16	-0.35	0.16
b1465	JW1460	gene1498	narV	27.67	4.10	-0.39	0.50	-4.13	0.33	-3.89	0.73	-3.68	0.68	-3.31	0.58	-2.10	0.52	-0.20	0.33	1.87	0.40	1.60	0.25	1.78	0.22
b1466	JW1461	gene1499	narW	26.00	2.31	-0.43	0.51	-4.45	0.36	-5.00	1.00	-5.70	1.15	-3.38	0.60	-2.97	0.57	-0.20	0.34	1.95	0.41	1.66	0.26	1.63	0.24
b0018	Null	gene15	mokC	1.33	0.67	-0.24	0.69	0.73	0.87	-0.64	1.63	-0.32	1.43	0.08	1.32	-0.78	1.36	0.72	1.01	-0.28	0.98	-0.27	0.80	0.42	0.51
b0155	JW5012	gene150	clcA	259.67	38.86	0.02	0.23	-0.91	0.09	-1.37	0.17	-1.17	0.22	-1.11	0.19	-0.44	0.26	0.27	0.16	0.46	0.17	0.38	0.13	0.32	0.15
b1467	JW1462	gene1500	narY	119.33	20.58	-1.10	0.34	-5.44	0.22	-4.90	0.48	-4.95	0.50	-3.56	0.33	-2.24	0.32	-0.16	0.22	1.75	0.31	1.43	0.15	1.38	0.15
b1468	JW1463	gene1501	narZ	446.33	83.31	-1.66	0.25	-5.44	0.16	-4.87	0.27	-4.70	0.36	-3.74	0.22	-2.34	0.34	0.05	0.15	1.74	0.28	1.34	0.12	0.99	0.16
b1469	JW1464	gene1502	narU	93.33	19.54	-1.07	0.49	-6.82	0.36	-7.50	1.16	-6.26	0.80	-3.69	0.37	-2.21	0.47	0.97	0.19	2.35	0.29	1.63	0.17	1.46	0.17
-	-	gene1503	yddK	0.33	0.33	-0.09	0.49	-0.84	1.76	1.50	1.90	0.12	2.04	-0.02	2.14	-1.00	1.52	0.50	1.26	-0.01	0.86	0.23	0.71	-0.16	0.35
-	-	gene1504	yddL	0.00	0.00	NA	NA	1.42	2.26	NA	NA	NA	NA	NA	NA	NA	NA	NA	NA	NA	NA	NA	NA	0.01	0.20
b1473	JW1469	gene1505	yddG	24.00	6.08	-1.52	0.70	-0.21	0.28	0.42	0.39	1.03	0.42	1.20	0.33	1.19	0.49	0.85	0.32	0.81	0.35	1.18	0.29	0.78	0.31
b1474	JW1470	gene1506	fdnG	40.67	12.78	-0.40	0.50	-1.40	0.25	-1.33	0.41	-0.56	0.43	6.26	0.22	4.17	0.49	1.24	0.26	1.15	0.30	0.92	0.26	0.22	0.37
b1475	JW1471	gene1507	fdnH	8.33	1.67	0.31	0.69	-0.25	0.39	-0.11	0.64	-0.24	0.62	4.71	0.35	3.21	0.52	-0.16	0.55	-0.07	0.56	0.05	0.51	0.17	0.38
b1476	JW1472	gene1508	fdnI	23.33	2.96	-1.00	0.58	-0.79	0.31	-1.66	0.49	-1.61	0.48	3.18	0.29	1.75	0.44	-0.72	0.38	-1.05	0.42	-0.14	0.34	0.07	0.27
b1477	JW5908	gene1509	yddM	257.33	40.42	0.81	0.32	-1.89	0.10	-2.92	0.21	-2.43	0.27	-2.68	0.21	-2.43	0.25	-1.62	0.18	-1.97	0.21	-1.56	0.16	-1.13	0.18
b0156	JW0152	gene151	erpA	225.67	50.84	1.31	0.26	2.06	0.16	1.19	0.17	1.26	0.34	-0.13	0.21	0.52	0.26	0.02	0.18	0.19	0.22	0.62	0.16	0.56	0.20
b1478	JW1474	gene1510	adhP	7270.33	1110.60	-1.35	0.42	-7.33	0.13	-7.09	0.16	-7.30	0.23	-7.56	0.21	-6.57	0.42	-5.21	0.13	-3.33	0.26	-2.30	0.10	-1.23	0.22
b1479	JW5238	gene1511	maeA	682.00	126.10	-0.20	0.21	0.06	0.10	0.99	0.11	1.19	0.20	1.42	0.17	0.85	0.25	0.09	0.13	0.90	0.21	0.91	0.11	0.24	0.19
b1480	JW5962	gene1512	sra	8984.00	1192.81	-2.50	0.34	-9.96	0.17	-9.05	0.24	-8.90	0.32	-6.90	0.20	-3.77	0.30	-1.31	0.13	-0.60	0.24	-0.03	0.14	-0.10	0.17
b1481	JW5239	gene1513	bdm	20.67	5.21	-1.44	0.71	-3.89	0.45	-4.16	0.91	-5.34	1.19	-4.48	0.88	-2.76	0.68	-0.52	0.41	0.18	0.40	-0.09	0.38	0.98	0.44
b1482	JW1477	gene1514	osmC	6540.33	1135.71	-1.77	0.40	-7.65	0.17	-6.43	0.16	-5.97	0.33	-5.38	0.20	-3.34	0.38	-1.00	0.14	-0.26	0.19	0.05	0.12	-0.10	0.17
b1483	JW1478	gene1515	ddpF	28.33	5.04	-0.04	0.52	-3.42	0.31	-3.68	0.70	-3.35	0.66	-3.49	0.60	-2.27	0.50	-1.54	0.40	-1.13	0.42	-0.61	0.34	-0.42	0.27
b1484	JW1479	gene1516	ddpD	53.00	9.54	-1.14	0.51	-3.69	0.29	-4.17	0.58	-3.55	0.56	-3.68	0.47	-2.94	0.43	-1.28	0.31	-0.84	0.33	-0.61	0.26	-0.61	0.22
b1485	JW1480	gene1517	ddpC	36.33	4.91	-0.64	0.47	-3.53	0.28	-4.94	0.85	-4.33	0.72	-4.19	0.63	-2.55	0.47	-1.90	0.38	-1.81	0.42	-1.01	0.33	-0.78	0.25
b1486	JW1481	gene1518	ddpB	44.67	8.37	-0.21	0.47	-4.01	0.27	-4.07	0.62	-5.25	0.82	-3.98	0.54	-3.99	0.57	-1.86	0.34	-1.38	0.35	-0.92	0.29	-0.69	0.26
b1487	JW5240	gene1519	ddpA	242.67	41.66	-1.39	0.38	-5.16	0.18	-6.05	0.48	-4.84	0.46	-5.76	0.41	-4.14	0.33	-1.82	0.19	-1.28	0.31	-1.24	0.17	-0.49	0.31
b0157	JW0153	gene152	yadS	24.67	4.26	1.25	0.49	2.59	0.20	2.04	0.27	1.40	0.34	0.52	0.35	0.41	0.39	-1.17	0.40	-0.80	0.41	-0.10	0.34	-0.28	0.31
b1488	JW1483	gene1520	ddpX	60.00	8.14	-0.40	0.48	-5.02	0.38	-8.45	1.78	-4.26	0.59	-5.65	0.73	-4.43	0.56	-1.03	0.27	-1.12	0.29	-1.10	0.26	0.12	0.36
b1489	JW1484	gene1521	dosP	312.33	51.32	-0.68	0.36	-4.46	0.15	-5.07	0.32	-4.77	0.37	-4.95	0.30	-3.53	0.42	-3.41	0.20	-1.52	0.21	-1.60	0.16	-1.55	0.16
b1490	JW5241	gene1522	dosC	626.33	97.98	-1.31	0.50	-4.79	0.15	-6.13	0.65	-5.93	0.41	-5.84	0.30	-4.87	0.29	-3.45	0.19	-1.84	0.26	-2.38	0.16	-1.66	0.21
b1491	JW1486	gene1523	yddW	136.67	30.25	0.87	0.34	0.05	0.14	0.31	0.18	0.21	0.25	0.36	0.20	0.56	0.35	-0.50	0.20	-0.15	0.22	0.52	0.16	0.24	0.18
b1492	JW1487	gene1524	gadC	40228.00	6124.87	-1.54	0.24	-10.95	0.15	-10.89	0.22	-10.92	0.37	-11.55	0.28	-6.82	0.53	-1.16	0.13	0.18	0.24	0.67	0.11	0.48	0.22
b1493	JW1488	gene1525	gadB	34357.00	5642.31	-0.92	0.22	-11.75	0.22	-10.70	0.43	-11.19	0.37	-11.83	0.28	-6.35	0.50	-1.08	0.13	0.36	0.23	0.80	0.10	0.29	0.19
b1494	JW1489	gene1526	pqqL	17.67	6.44	0.01	0.62	2.54	0.25	2.49	0.32	1.42	0.56	0.70	0.42	0.68	0.46	0.20	0.45	0.41	0.45	0.02	0.41	-0.30	0.33
b1495	JW1490	gene1527	yddB	11.00	3.21	-0.22	0.67	2.28	0.30	2.79	0.36	1.85	0.46	1.05	0.46	0.59	0.51	-0.37	0.53	-0.73	0.56	-0.66	0.53	-1.01	0.39
b1496	JW5242	gene1528	yddA	3.67	0.88	-0.39	0.81	3.42	0.46	3.36	0.54	2.37	0.74	0.92	0.77	-0.72	0.88	-3.00	1.09	-1.90	0.91	-2.00	0.79	-2.24	0.51
b1497	JW1492	gene1529	ydeM	1.33	0.67	0.87	0.80	1.01	0.93	0.21	1.41	2.50	0.94	3.70	0.82	4.93	0.72	1.79	0.86	1.90	0.81	0.73	0.77	0.22	0.51
b0158	JW0154	gene153	btuF	21.33	3.18	1.31	0.43	2.57	0.21	1.99	0.29	1.56	0.41	1.09	0.32	1.44	0.33	-0.55	0.39	0.40	0.36	0.80	0.31	0.32	0.29
b1498	JW5243	gene1530	ydeN	7.67	2.40	-0.08	0.78	-0.52	0.48	-0.29	0.71	3.46	0.96	5.37	0.39	7.86	0.35	7.00	0.34	5.49	0.44	2.80	0.37	1.06	0.41
b1499	JW1494	gene1531	ydeO	1.00	0.58	0.24	0.72	1.15	0.95	-0.24	1.72	1.17	1.23	1.51	1.19	0.34	1.31	0.83	1.07	1.02	0.91	-0.05	0.80	-0.32	0.49
b1500	Null	gene1532	safA	0.00	0.00	NA	NA	1.95	2.23	NA	NA	1.34	2.07	1.33	2.22	NA	NA	NA	NA	NA	NA	NA	NA	0.07	0.22
b1501	JW1495	gene1533	ydeP	32.00	5.69	0.45	0.41	-0.86	0.21	-0.81	0.37	-0.69	0.42	-0.78	0.35	-0.43	0.34	-0.20	0.31	-0.37	0.33	-0.26	0.31	-0.07	0.25
b1502	JW1496	gene1534	ydeQ	1.33	0.67	-0.48	0.63	0.75	0.84	0.26	1.40	0.89	1.13	1.54	1.05	-0.39	1.30	0.45	1.01	0.12	0.96	0.16	0.79	-0.11	0.51
b1503	JW1497	gene1535	ydeR	0.33	0.33	-0.12	0.49	1.35	1.42	1.23	1.97	1.93	1.55	2.10	1.57	0.63	1.57	0.86	1.25	0.75	0.99	-0.06	0.65	0.01	0.42
b1504	JW1498	gene1536	ydeS	0.00	0.00	NA	NA	3.67	2.04	3.77	2.26	3.39	1.96	3.36	2.09	1.05	1.55	1.30	1.21	0.90	0.88	NA	NA	0.27	0.32
-	-	gene1537	ydeT	1.67	0.33	-0.43	0.76	1.60	0.71	3.34	0.78	3.43	0.77	1.89	0.89	0.41	1.03	0.46	0.94	0.46	0.87	-0.34	0.79	-0.23	0.51
-	-	gene1538	yneL	0.67	0.67	-0.22	0.51	1.03	1.14	1.22	1.56	2.62	1.22	-0.18	1.87	0.73	1.36	0.71	1.16	-0.45	0.94	0.09	0.78	-0.24	0.45
b1507	JW1500	gene1539	hipA	95.33	19.55	-0.30	0.32	-0.53	0.15	-0.24	0.22	0.07	0.25	-0.04	0.23	0.37	0.27	1.82	0.18	0.78	0.35	-0.02	0.20	0.06	0.17
b0159	JW0155	gene154	mtn	552.67	94.34	-0.35	0.26	-0.25	0.08	0.83	0.11	0.45	0.30	0.32	0.15	0.98	0.21	-0.15	0.13	-0.35	0.18	-0.09	0.12	-0.35	0.17
b1508	JW1501	gene1540	hipB	17.00	2.65	-0.93	0.67	0.20	0.26	0.78	0.39	0.66	0.41	0.93	0.37	1.37	0.37	2.98	0.27	1.58	0.46	0.57	0.37	0.04	0.28
-	-	gene1541	yneO	69.00	12.12	1.01	0.31	-1.55	0.18	-2.32	0.36	-1.91	0.35	-1.54	0.30	-1.57	0.35	-0.14	0.23	-0.11	0.29	-0.20	0.23	0.22	0.25
b1511	JW1504	gene1542	lsrK	83.00	9.07	0.51	0.32	-3.27	0.18	-3.40	0.39	-1.30	0.57	-2.07	0.29	-1.82	0.32	0.58	0.20	1.78	0.33	3.30	0.15	2.25	0.28
b1512	JW1505	gene1543	lsrR	54.00	9.87	0.65	0.41	-2.83	0.21	-2.96	0.44	-0.14	0.55	-1.19	0.31	-0.68	0.32	1.50	0.21	1.94	0.26	3.17	0.17	2.20	0.33
b1513	JW1506	gene1544	lsrA	77.00	18.36	-0.05	0.47	-5.87	0.33	-5.31	0.67	-2.27	0.64	-2.24	0.32	-1.12	0.38	1.75	0.20	2.53	0.34	4.16	0.15	2.35	0.38
b1514	JW1507	gene1545	lsrC	43.33	10.04	-0.04	0.40	-5.08	0.33	-4.26	0.66	-2.40	0.45	-3.37	0.49	-2.51	0.44	0.54	0.26	1.77	0.38	3.66	0.18	2.14	0.34
b1515	JW1508	gene1546	lsrD	18.33	3.53	0.64	0.53	-2.97	0.37	-3.58	0.83	-1.61	0.58	-2.46	0.62	-1.02	0.47	0.91	0.34	2.40	0.43	4.10	0.24	3.00	0.32
b1516	JW1509	gene1547	lsrB	85.67	11.70	-0.31	0.47	-5.56	0.29	-4.87	0.55	-3.45	0.62	-2.85	0.33	-2.16	0.32	0.57	0.20	2.18	0.59	4.26	0.16	2.77	0.29
b1517	JW1510	gene1548	lsrF	57.00	11.53	-0.25	0.40	-4.13	0.27	-5.57	0.82	-2.99	0.49	-2.11	0.35	-1.65	0.35	1.48	0.20	2.89	0.40	4.62	0.17	3.36	0.28
b1518	JW1511	gene1549	lsrG	28.33	6.74	-0.69	0.57	-3.61	0.35	-7.51	1.86	-3.36	0.72	-2.87	0.55	-1.77	0.50	1.21	0.28	2.40	0.40	4.08	0.21	2.65	0.34
b0160	JW0156	gene155	dgt	158.33	24.69	-0.92	0.31	-1.11	0.14	-0.97	0.21	-0.22	0.34	-0.10	0.20	0.19	0.22	0.67	0.18	0.65	0.20	0.07	0.17	0.02	0.17
b1519	JW1512	gene1550	tam	852.00	156.04	-0.79	0.35	-7.11	0.16	-7.02	0.36	-6.30	0.52	-5.42	0.24	-2.91	0.39	-0.67	0.13	-0.33	0.15	-0.05	0.11	-0.22	0.13
b1520	JW5245	gene1551	yneE	11.00	0.58	1.81	0.56	3.83	0.27	2.89	0.34	1.43	0.80	-1.34	0.65	-1.29	0.60	-0.35	0.50	-0.42	0.53	-0.08	0.46	0.03	0.33
b1521	JW1514	gene1552	uxaB	51.33	15.86	0.06	0.40	-1.87	0.26	-1.93	0.39	-0.17	0.48	1.67	0.27	2.23	0.39	2.28	0.22	1.88	0.30	1.38	0.22	0.26	0.27
b1522	JW5825	gene1553	yneF	20.00	4.00	1.56	0.46	1.50	0.25	0.42	0.40	0.50	0.44	-0.34	0.44	0.13	0.45	0.17	0.39	-0.52	0.44	0.34	0.35	0.34	0.29
b1523	JW1516	gene1554	yneG	2.33	0.33	1.33	0.76	4.59	0.54	3.21	0.67	2.91	0.70	2.24	0.74	1.83	0.77	-1.56	1.08	-1.00	0.93	1.02	0.66	0.84	0.47
b1524	JW1517	gene1555	glsB	30.33	2.73	1.09	0.59	2.57	0.19	1.96	0.25	1.50	0.39	1.19	0.29	0.32	0.34	-0.61	0.33	-0.63	0.35	0.43	0.28	0.34	0.23
b1525	JW5247	gene1556	sad	72.33	14.17	0.61	0.35	-0.34	0.16	-1.05	0.28	-0.80	0.32	-0.15	0.25	0.01	0.27	-0.22	0.23	-0.02	0.25	0.07	0.22	-0.02	0.22
b1526	JW1519	gene1557	yneJ	48.67	7.51	0.21	0.37	-1.07	0.19	-0.45	0.29	-0.13	0.32	-0.17	0.28	-0.51	0.35	-0.44	0.28	0.15	0.29	0.49	0.23	0.40	0.20
b1527	JW1520	gene1558	yneK	5.33	0.67	-0.30	0.76	-0.23	0.47	-1.81	1.02	-0.54	0.74	-1.12	0.86	-0.59	0.73	-0.94	0.74	-0.54	0.68	-0.04	0.61	-0.25	0.42
b1528	JW1521	gene1559	ydeA	21.67	5.93	0.22	0.64	2.77	0.22	2.21	0.28	0.94	0.92	-0.66	0.43	-0.31	0.47	-1.01	0.42	-0.27	0.39	0.18	0.34	0.21	0.28
b0161	JW0157	gene156	degP	1780.33	275.60	-1.65	0.22	-2.55	0.14	-1.10	0.11	-0.85	0.34	-0.48	0.14	-0.24	0.17	-0.46	0.14	0.10	0.22	0.46	0.11	0.26	0.15
b1529	JW1522	gene1560	marC	201.33	23.02	-0.40	0.27	-1.78	0.12	-1.79	0.20	-2.06	0.30	-2.00	0.22	-1.51	0.29	-0.24	0.18	-0.43	0.21	0.05	0.15	0.19	0.15
b1530	JW5248	gene1561	marR	11.00	2.89	2.11	0.63	2.99	0.29	2.86	0.35	2.03	0.53	1.02	0.45	1.58	0.50	1.04	0.43	0.89	0.48	0.52	0.44	0.02	0.37
b1531	JW5249	gene1562	marA	29.67	6.57	0.75	0.48	3.14	0.20	3.10	0.23	2.52	0.49	1.77	0.27	2.03	0.33	1.02	0.28	1.52	0.34	0.96	0.27	0.08	0.30
b1532	JW1525	gene1563	marB	4.33	1.33	-0.11	0.79	3.02	0.43	3.94	0.47	3.56	0.71	2.29	0.57	2.68	0.55	1.11	0.61	1.57	0.56	1.66	0.51	0.54	0.43
b1533	JW5250	gene1564	eamA	106.33	21.18	0.21	0.35	-1.76	0.19	-2.36	0.30	-1.39	0.36	-2.46	0.30	-2.41	0.35	-0.54	0.25	-0.65	0.26	-0.83	0.22	-0.45	0.24
b1534	JW1527	gene1565	ydeE	66.67	11.57	0.41	0.40	-1.70	0.16	-1.61	0.30	-0.24	0.45	-2.15	0.32	-2.24	0.37	-0.71	0.24	-0.52	0.26	-0.54	0.24	0.00	0.21
b4599	Null	gene1566	yneM	166.67	26.72	-3.28	0.49	-2.19	0.26	-0.89	0.26	-0.72	0.39	-0.62	0.26	-0.48	0.40	-0.05	0.23	-1.23	0.32	-1.88	0.25	-1.31	0.37
b1535	JW1528	gene1568	dgcZ	39.67	6.36	0.43	0.53	0.13	0.19	-0.87	0.35	-0.99	0.39	-0.51	0.31	-0.30	0.32	-0.11	0.28	0.27	0.31	0.81	0.24	0.28	0.24
b1536	JW1529	gene1569	ydeI	396.00	78.23	-0.74	0.49	-5.85	0.20	-7.68	0.63	-7.25	0.62	-6.86	0.45	-4.62	0.41	-1.92	0.19	-0.78	0.24	-0.91	0.16	-0.12	0.26
b0162	JW5013	gene157	cdaR	38.00	10.02	0.26	0.45	-1.46	0.24	-2.59	0.49	-0.10	0.64	0.99	0.29	0.99	0.35	0.79	0.28	-0.13	0.36	-0.30	0.31	-0.16	0.29
b1537	JW1530	gene1570	ydeJ	240.00	49.52	-0.69	0.49	-5.34	0.25	-6.17	0.51	-6.73	0.64	-6.02	0.45	-4.50	0.41	-1.96	0.20	-0.86	0.22	-0.91	0.18	-0.48	0.27
b1538	JW1531	gene1571	dcp	1055.33	171.41	-0.77	0.24	-2.28	0.09	-2.08	0.13	-1.70	0.21	-1.37	0.15	-1.21	0.18	-1.33	0.14	-1.16	0.16	-0.61	0.12	-0.35	0.12
b1539	JW1532	gene1572	ydfG	769.33	110.25	-0.96	0.25	-2.23	0.10	-0.98	0.12	-0.75	0.22	0.05	0.14	0.60	0.16	0.18	0.14	0.21	0.16	0.22	0.12	0.20	0.13
b1540	JW1533	gene1573	rspR	57.67	4.81	2.21	0.39	1.93	0.15	1.29	0.21	1.09	0.28	0.90	0.23	1.13	0.27	0.28	0.24	0.37	0.27	1.08	0.20	0.59	0.28
b1541	JW1534	gene1574	ydfZ	178.33	25.86	-2.54	0.56	-3.37	0.19	-3.88	0.32	-4.62	0.73	0.12	0.23	0.63	0.36	1.37	0.18	0.71	0.25	1.27	0.16	0.74	0.27
b1542	JW1535	gene1575	ydfI	13.00	2.31	0.70	0.60	0.49	0.31	0.03	0.50	-0.24	0.49	-0.09	0.48	-1.16	0.56	0.43	0.41	0.25	0.45	0.30	0.42	-0.17	0.32
-	-	gene1576	ydfJ	5.67	0.67	0.41	0.73	0.82	0.42	-0.52	0.79	-0.78	0.84	-1.81	0.90	-1.54	0.84	0.26	0.61	-0.23	0.66	0.13	0.58	0.21	0.41
b1544	JW1537	gene1577	ydfK	1.67	1.20	4.20	0.70	3.12	0.66	-3.75	2.28	0.50	1.15	-0.79	1.46	-1.60	1.47	-2.49	1.26	-1.13	0.99	-0.94	0.79	-0.61	0.50
b1545	JW1538	gene1578	pinQ	1.67	0.67	1.88	0.77	2.06	0.69	-0.66	1.40	0.36	1.12	-0.41	1.26	0.03	1.09	0.82	0.88	0.36	0.87	-0.19	0.79	0.20	0.50
b1546	JW1539	gene1579	tfaQ	0.33	0.33	0.34	0.60	1.99	1.37	0.94	2.16	1.70	1.61	-0.02	2.14	-1.00	1.52	1.45	1.20	0.67	0.99	0.23	0.71	0.79	0.50
b0163	JW0159	gene158	yaeH	473.67	99.71	-1.00	0.31	-2.46	0.18	-2.75	0.20	-1.54	0.47	-0.76	0.22	0.41	0.24	1.01	0.19	0.82	0.21	0.21	0.16	0.29	0.19
b1547	JW1540	gene1580	stfQ	0.67	0.33	2.40	0.79	1.44	1.11	0.41	1.71	0.33	1.55	0.14	1.58	1.41	1.19	0.79	1.14	0.38	0.98	0.09	0.79	0.72	0.51
-	-	gene1581	nohQ	0.33	0.33	0.70	0.69	1.98	1.36	1.45	1.90	0.69	1.83	-1.70	2.22	0.58	1.62	1.36	1.20	0.61	0.99	1.01	0.80	0.73	0.50
b4533	JW5251	gene1582	ynfO	1.33	0.33	-0.59	0.69	-3.79	1.36	-3.62	2.27	-0.91	1.49	1.85	0.99	2.56	0.87	1.03	0.97	0.76	0.88	1.15	0.73	0.41	0.51
b1549	JW5252	gene1583	ydfO	0.33	0.33	0.13	0.51	4.49	1.24	4.95	1.30	3.61	1.34	4.36	1.28	3.69	1.25	3.06	1.04	2.50	0.91	1.70	0.79	0.71	0.50
b1550	JW5253	gene1584	gnsB	12.00	2.31	-1.00	0.72	3.20	0.34	2.63	0.35	2.08	0.45	2.34	0.37	2.20	0.38	2.27	0.34	1.73	0.41	1.10	0.38	1.37	0.30
b1551	JW5254	gene1585	ynfN	0.00	0.00	2.33	0.80	4.46	1.99	1.60	2.51	NA	NA	1.33	2.22	NA	NA	NA	NA	NA	NA	NA	NA	0.01	0.20
b1552	JW1544	gene1586	cspI	1.00	0.58	4.73	0.68	4.27	0.80	1.31	1.32	0.67	1.28	0.66	1.34	-1.16	1.53	-0.73	1.22	-0.69	0.99	-0.59	0.77	0.00	0.51
b1553	JW1545	gene1587	rzpQ	0.00	0.00	NA	NA	3.14	2.07	NA	NA	NA	NA	1.33	2.22	NA	NA	0.48	1.01	0.41	0.69	NA	NA	0.05	0.21
b4689	Null	gene1588	rzoQ	0.00	0.00	NA	NA	NA	NA	NA	NA	NA	NA	NA	NA	NA	NA	NA	NA	NA	NA	NA	NA	NA	NA
b1554	JW1546	gene1589	rrrQ	0.00	0.00	NA	NA	3.92	2.02	3.23	2.35	3.88	1.91	2.21	2.20	2.09	1.65	0.48	1.01	NA	NA	NA	NA	0.37	0.37
b0164	JW5014	gene159	yaeI	7.33	1.86	1.19	0.60	1.40	0.39	1.04	0.55	1.95	0.69	1.03	0.54	0.92	0.51	0.33	0.54	0.23	0.57	0.30	0.54	-0.51	0.41
b1555	JW1547	gene1590	ydfR	0.00	0.00	0.36	0.49	3.64	2.05	NA	NA	2.82	2.04	NA	NA	1.07	1.55	0.65	1.05	NA	NA	0.28	0.48	0.38	0.38
b1556	JW5255	gene1591	essQ	0.00	0.00	NA	NA	4.56	1.98	NA	NA	NA	NA	NA	NA	NA	NA	NA	NA	NA	NA	NA	NA	0.15	0.26
b1557	JW1549	gene1592	cspB	5.33	1.33	4.41	0.59	5.82	0.43	2.54	0.51	2.38	0.60	0.18	0.70	-0.58	0.78	-0.95	0.74	-0.64	0.71	-0.52	0.64	-0.91	0.45
b1558	JW1550	gene1593	cspF	0.00	0.00	4.73	0.76	9.18	1.62	6.59	1.95	6.15	1.68	2.28	2.20	3.23	1.59	2.30	1.26	NA	NA	0.28	0.48	0.40	0.38
b1559	JW1551	gene1594	quuQ	4.33	1.45	0.77	0.74	0.92	0.48	0.30	0.82	-0.21	0.86	-0.25	0.82	-0.98	0.95	0.71	0.65	-0.48	0.76	0.07	0.64	1.02	0.42
b1560	JW5909	gene1595	ydfU	1.33	0.33	1.53	0.79	1.61	0.79	1.00	1.19	1.74	1.04	1.08	1.09	-0.03	1.16	-1.03	1.17	-0.12	0.95	-0.15	0.80	0.21	0.51
b1561	JW1553	gene1596	rem	3.33	1.20	0.99	0.79	1.39	0.56	-0.10	0.98	-1.71	1.21	-0.69	0.97	-0.32	0.92	0.60	0.72	-0.24	0.78	0.05	0.69	0.01	0.47
b1562	JW1554	gene1597	hokD	280.00	41.67	-0.73	0.38	-2.67	0.13	-2.37	0.20	-2.55	0.30	-2.65	0.21	-2.24	0.26	-1.25	0.18	-0.98	0.20	-0.58	0.15	-0.64	0.17
b1563	JW1555	gene1598	relE	288.00	49.10	-1.17	0.37	-1.59	0.18	-2.05	0.21	-2.17	0.30	-2.54	0.23	-1.96	0.27	-0.87	0.19	-0.79	0.22	-0.67	0.17	-0.41	0.20
b1564	JW1556	gene1599	relB	125.67	20.85	-1.51	0.36	-1.29	0.15	-2.26	0.27	-1.78	0.31	-2.24	0.28	-1.66	0.31	-0.65	0.20	-0.71	0.23	-0.48	0.19	-0.06	0.20
b4412	JW5879	gene16	hokC	0.00	0.00	NA	NA	NA	NA	NA	NA	NA	NA	NA	NA	NA	NA	NA	NA	NA	NA	NA	NA	NA	NA
b0166	JW0161	gene160	dapD	948.67	153.53	-0.16	0.22	0.09	0.07	0.59	0.10	0.86	0.28	1.00	0.14	0.46	0.19	0.39	0.12	0.23	0.18	-0.14	0.11	-0.23	0.13
b1565	JW1557	gene1600	ydfV	0.67	0.67	0.76	0.76	0.72	1.19	-0.11	2.02	-2.07	2.09	0.22	1.65	0.70	1.45	2.00	1.01	1.11	0.95	0.31	0.80	0.34	0.50
b1566	JW1558	gene1601	flxA	3.00	0.58	0.45	0.79	0.24	0.67	-2.69	1.54	-1.46	1.15	-1.10	1.08	0.40	0.82	2.26	0.60	2.13	0.59	1.12	0.61	0.37	0.46
-	-	gene1602	intK	1.00	0.58	0.00	0.70	0.61	0.99	-1.42	1.94	1.01	1.30	-0.84	1.62	-0.54	1.40	-0.39	1.17	-0.85	0.99	0.22	0.80	0.09	0.51
-	-	gene1603	ydfX	0.33	0.33	-0.12	0.49	1.41	1.44	0.76	2.08	0.69	1.83	1.38	1.72	-0.10	1.65	1.09	1.22	0.24	0.94	0.19	0.71	0.36	0.48
b1569	JW1561	gene1604	dicC	0.33	0.33	-0.15	0.50	-0.09	1.69	-1.92	2.50	-1.58	2.07	-0.40	2.08	-0.23	1.65	-0.20	1.25	0.26	0.97	-0.11	0.67	0.07	0.43
b1570	JW1562	gene1605	dicA	60.33	11.84	1.97	0.42	2.00	0.18	1.34	0.23	1.50	0.33	0.91	0.29	1.28	0.29	1.30	0.22	0.93	0.27	0.90	0.22	0.35	0.25
b1571	JW1563	gene1606	ydfA	2.67	0.88	-1.04	0.76	-0.70	0.68	-0.25	1.08	0.61	0.90	-0.57	1.05	-0.73	1.03	0.07	0.83	-0.40	0.84	0.25	0.70	-0.17	0.50
b1572	JW1564	gene1607	ydfB	0.00	0.00	NA	NA	3.35	2.06	2.65	2.42	3.23	2.00	1.39	2.22	NA	NA	2.17	1.26	0.87	0.87	1.00	0.73	0.68	0.45
b1573	JW1565	gene1608	ydfC	5.00	0.00	0.35	0.74	0.38	0.47	-0.83	0.88	-0.26	0.76	-1.39	0.88	-1.31	0.85	-0.93	0.74	0.19	0.65	-0.31	0.63	0.01	0.42
b0167	JW0162	gene161	glnD	483.00	77.09	-0.26	0.30	-0.68	0.10	-0.76	0.13	-1.21	0.21	-1.76	0.17	-1.54	0.21	-1.32	0.15	-1.39	0.17	-1.55	0.13	-1.20	0.15
b1575	JW1566	gene1610	dicB	0.00	0.00	0.67	0.61	3.02	2.10	1.72	2.51	1.40	2.07	3.16	2.12	1.05	1.55	0.75	1.09	0.41	0.69	0.28	0.48	0.05	0.21
b1576	JW1567	gene1611	ydfD	0.33	0.33	-0.12	0.49	1.23	1.43	1.45	1.90	0.69	1.83	-0.22	2.12	-1.10	1.54	-0.88	1.09	0.20	0.93	-0.06	0.65	0.07	0.43
-	-	gene1612	ydfE	11.67	0.88	0.29	0.64	-1.26	0.36	-0.32	0.55	-0.72	0.62	-0.82	0.57	-1.58	0.63	-1.27	0.56	-0.77	0.58	-0.50	0.48	-1.06	0.35
b0361	Null	gene1613	insD1	0.33	0.33	-0.09	0.49	-3.71	2.31	-1.51	2.51	-1.30	2.07	-1.54	2.21	-1.00	1.52	-0.75	1.04	-0.45	0.69	-0.31	0.48	-0.32	0.26
-	-	gene1614	intQ	2.33	0.88	1.15	0.76	0.96	0.63	0.59	1.05	-1.57	1.30	0.12	1.04	0.31	0.92	1.39	0.76	1.15	0.74	-0.16	0.77	-0.04	0.49
b1580	JW1572	gene1615	rspB	2.33	0.88	0.43	0.80	0.17	0.68	0.03	1.18	0.94	1.10	1.17	0.89	0.91	0.84	-0.18	0.93	0.32	0.82	0.41	0.72	0.10	0.49
b1581	JW1573	gene1616	rspA	5.33	3.18	0.21	0.80	-1.40	0.65	-0.12	0.90	0.79	0.88	1.38	0.66	0.64	0.77	0.65	0.65	0.90	0.66	0.32	0.62	-0.22	0.47
b1582	JW1574	gene1617	ynfA	5.00	1.53	0.01	0.80	1.38	0.43	1.07	0.66	0.66	0.71	0.48	0.68	1.03	0.63	0.93	0.59	0.70	0.63	0.86	0.54	0.37	0.42
b1583	JW1575	gene1618	ynfB	51.67	6.77	0.07	0.38	1.51	0.15	2.09	0.20	2.10	0.25	2.14	0.21	2.32	0.26	2.53	0.20	2.04	0.22	1.37	0.20	0.54	0.25
b1584	JW1576	gene1619	speG	27.00	4.00	0.69	0.50	3.30	0.20	3.64	0.22	3.62	0.29	3.40	0.24	3.13	0.29	3.12	0.24	2.66	0.26	2.16	0.24	1.37	0.26
b0168	JW0163	gene162	map	687.00	116.13	-0.40	0.26	1.11	0.10	1.29	0.12	0.96	0.32	-0.05	0.16	-0.34	0.21	-0.90	0.14	-1.04	0.18	-1.14	0.13	-1.08	0.15
b1585	JW5258	gene1620	ynfC	127.67	31.39	-0.11	0.41	-1.61	0.23	-1.58	0.28	-1.00	0.37	-1.07	0.26	-0.42	0.31	0.64	0.20	0.50	0.26	0.17	0.20	0.25	0.24
b1586	JW5259	gene1621	ynfD	148.00	24.03	-0.07	0.38	-5.27	0.21	-3.19	0.29	-2.66	0.32	-1.27	0.23	-0.08	0.36	0.81	0.19	1.15	0.19	0.70	0.16	0.42	0.21
b1587	JW1579	gene1622	ynfE	62.33	16.33	-1.04	0.44	-4.51	0.28	-4.05	0.54	-3.67	0.53	0.08	0.26	3.50	0.40	3.93	0.21	3.21	0.28	2.42	0.19	1.02	0.39
b1588	JW5260	gene1623	ynfF	153.33	35.89	-1.14	0.37	-2.90	0.18	-2.27	0.26	-2.28	0.40	0.05	0.24	3.90	0.38	3.44	0.17	2.95	0.19	2.63	0.14	1.35	0.33
b1589	JW1581	gene1624	ynfG	13.00	3.00	-1.25	0.74	-2.11	0.40	-1.48	0.64	-2.05	0.70	0.50	0.45	4.59	0.41	4.30	0.29	3.71	0.30	3.27	0.29	1.72	0.38
b1590	JW5261	gene1625	ynfH	42.67	8.76	0.22	0.41	-0.08	0.19	-0.77	0.34	-0.90	0.39	-0.23	0.32	3.51	0.38	3.21	0.21	2.57	0.23	2.27	0.20	1.20	0.35
b1591	JW5262	gene1626	dmsD	38.33	7.42	1.37	0.37	1.67	0.17	1.30	0.25	0.88	0.34	0.80	0.29	2.24	0.35	1.53	0.23	1.31	0.29	1.37	0.23	0.69	0.28
b1592	JW5263	gene1627	clcB	17.33	4.48	1.63	0.52	1.30	0.24	0.80	0.39	-0.16	0.66	-0.66	0.46	-0.62	0.49	-2.05	0.54	-0.75	0.47	0.28	0.37	0.09	0.28
b1593	JW5264	gene1628	ynfK	348.00	50.30	-1.67	0.36	-3.89	0.16	-3.99	0.25	-2.52	0.46	1.06	0.18	0.72	0.29	1.79	0.16	1.14	0.22	1.33	0.14	0.36	0.37
b1594	JW1586	gene1629	mlc	62.33	12.72	1.16	0.39	0.76	0.14	-0.21	0.25	2.55	0.65	1.80	0.21	2.30	0.25	1.42	0.20	1.18	0.23	1.31	0.20	0.90	0.24
b1595	JW1587	gene1630	ynfL	50.33	4.06	-0.94	0.46	-1.94	0.22	-1.54	0.36	-0.97	0.40	-1.21	0.33	-0.75	0.35	0.33	0.25	0.30	0.28	0.15	0.25	-0.05	0.23
b1596	JW1588	gene1631	ynfM	848.67	142.37	1.17	0.19	-4.98	0.10	-4.42	0.18	-5.12	0.27	-5.38	0.23	-5.10	0.26	-4.68	0.18	-4.36	0.20	-2.31	0.14	-1.16	0.38
b1597	JW5826	gene1632	asr	68.33	5.70	-1.74	0.45	-4.31	0.33	-6.36	0.94	-3.85	0.50	-3.17	0.40	-1.98	0.33	-0.80	0.26	-0.12	0.26	0.01	0.22	-0.22	0.20
b4601	Null	gene1633	ydgU	0.00	0.00	NA	NA	1.82	2.16	NA	NA	NA	NA	NA	NA	1.05	1.55	NA	NA	NA	NA	NA	NA	0.11	0.22
b1598	JW1590	gene1634	ydgD	313.33	34.17	-0.39	0.24	-3.36	0.12	-2.77	0.20	-2.04	0.28	-1.93	0.19	-0.56	0.36	1.39	0.14	0.99	0.23	0.63	0.14	0.50	0.16
b1599	JW1591	gene1635	mdtI	1.33	0.88	0.20	0.77	2.57	0.81	3.34	0.88	3.09	0.87	2.70	0.91	5.03	0.84	5.65	0.62	4.38	0.63	2.78	0.63	1.17	0.49
b1600	JW1592	gene1636	mdtJ	3.33	1.33	1.46	0.77	2.96	0.57	2.68	0.62	1.92	0.70	1.52	0.71	4.54	0.68	5.38	0.45	4.12	0.53	1.90	0.55	0.87	0.45
b1601	JW1593	gene1637	tqsA	38.67	9.02	-1.27	0.52	-2.13	0.23	-1.82	0.42	-1.27	0.39	-0.57	0.34	0.05	0.32	0.83	0.26	0.20	0.35	-0.30	0.31	-0.86	0.23
b1602	JW1594	gene1638	pntB	309.33	50.89	-0.39	0.23	-0.26	0.09	0.64	0.13	1.22	0.28	1.76	0.15	1.56	0.22	1.80	0.16	1.36	0.16	1.05	0.12	0.60	0.22
b1603	JW1595	gene1639	pntA	345.00	50.66	-0.41	0.23	-0.26	0.09	0.60	0.12	1.23	0.27	1.89	0.16	1.67	0.19	1.71	0.15	1.52	0.16	1.07	0.12	0.64	0.18
b0169	JW0164	gene164	rpsB	7029.00	1072.68	-0.67	0.18	2.61	0.08	2.36	0.09	1.75	0.33	1.09	0.14	0.84	0.27	-1.64	0.13	-1.40	0.19	-0.35	0.10	-0.25	0.19
b1604	JW1596	gene1640	ydgH	170.33	31.43	1.04	0.30	1.61	0.13	1.18	0.16	1.29	0.24	1.80	0.18	1.99	0.21	1.09	0.19	1.31	0.19	1.12	0.14	0.76	0.19
b1605	JW1597	gene1641	ydgI	36.67	5.78	0.32	0.39	2.86	0.16	2.57	0.22	1.38	0.85	-0.30	0.32	-0.75	0.46	-0.75	0.32	-0.83	0.35	-0.30	0.29	0.00	0.22
b1606	JW1598	gene1642	folM	55.00	8.33	0.83	0.38	0.71	0.16	0.58	0.23	0.23	0.42	-0.18	0.27	0.04	0.28	0.34	0.25	0.54	0.26	0.46	0.22	0.47	0.23
b1607	JW1599	gene1643	ydgC	20.67	5.21	0.69	0.56	-0.64	0.29	-0.81	0.49	-0.15	0.51	-1.08	0.47	-0.88	0.48	1.26	0.32	0.15	0.40	0.33	0.35	-0.01	0.30
b1608	JW1600	gene1644	rstA	211.00	33.13	0.92	0.31	-0.30	0.13	0.49	0.15	1.02	0.32	0.53	0.19	0.07	0.27	-1.30	0.18	-1.19	0.24	-0.79	0.16	-1.32	0.16
b1609	JW1601	gene1645	rstB	168.33	31.76	0.20	0.25	-0.43	0.12	0.08	0.16	0.49	0.32	0.12	0.19	-0.04	0.25	-1.78	0.20	-1.52	0.22	-0.93	0.17	-1.57	0.16
b1610	JW1602	gene1646	tus	122.67	24.52	-1.23	0.44	-1.73	0.18	-0.73	0.22	-0.49	0.27	-0.60	0.21	-0.43	0.24	-0.13	0.19	-0.15	0.22	0.02	0.19	-0.50	0.17
b1611	JW1603	gene1647	fumC	612.67	109.68	0.66	0.43	-3.68	0.13	-3.95	0.20	-1.55	0.51	-3.46	0.21	-3.15	0.45	-0.24	0.15	-0.93	0.19	-1.73	0.14	-1.48	0.22
b1612	JW1604	gene1648	fumA	1102.67	202.12	-0.41	0.19	-3.33	0.11	-2.80	0.13	0.48	0.71	-0.27	0.22	-0.99	0.36	1.12	0.15	0.06	0.15	-0.10	0.11	-0.45	0.13
b1613	JW1605	gene1649	manA	310.67	51.45	0.08	0.27	0.11	0.10	0.06	0.13	0.21	0.24	0.76	0.15	1.08	0.17	0.14	0.16	0.24	0.16	0.23	0.14	0.01	0.20
b0170	JW0165	gene165	tsf	2847.33	428.06	-1.03	0.28	2.80	0.07	2.51	0.09	2.05	0.33	1.41	0.15	1.23	0.27	-1.64	0.15	-1.47	0.21	-0.51	0.10	-0.30	0.17
b1614	JW1606	gene1650	ydgA	2802.00	455.76	-1.66	0.30	-2.04	0.11	-1.05	0.12	-1.13	0.21	-1.15	0.15	-0.83	0.25	0.32	0.14	0.43	0.18	0.11	0.12	-0.03	0.16
b1615	JW1607	gene1651	uidC	4.00	1.53	-0.01	0.79	-0.41	0.57	-2.34	1.34	-0.20	0.93	0.32	0.78	-0.63	0.88	-0.08	0.75	-0.85	0.86	-0.55	0.71	-0.18	0.46
b1616	JW1608	gene1652	uidB	16.33	3.28	0.97	0.51	-3.59	0.46	-3.45	0.85	-0.07	0.68	-0.22	0.45	-0.77	0.49	-1.44	0.50	-1.68	0.53	-0.70	0.45	-1.11	0.34
b1617	JW1609	gene1653	uidA	100.33	8.35	0.18	0.37	-4.16	0.21	-6.06	0.72	-0.66	0.82	-0.49	0.24	-1.33	0.36	-1.55	0.24	-1.96	0.29	-1.07	0.22	-1.25	0.23
b1618	JW1610	gene1654	uidR	106.67	13.45	0.69	0.29	-0.10	0.13	-0.59	0.22	0.48	0.37	0.60	0.20	0.44	0.24	0.61	0.19	0.26	0.21	0.27	0.19	0.19	0.18
b1619	JW1611	gene1655	hdhA	1054.33	196.23	-2.39	0.41	-4.65	0.15	-3.83	0.17	-2.59	0.35	-1.35	0.21	-0.52	0.29	0.81	0.15	1.21	0.19	0.61	0.13	0.36	0.17
b1620	JW1612	gene1656	malI	17.00	5.51	1.67	0.53	1.09	0.28	0.33	0.45	1.25	0.46	0.98	0.39	1.09	0.44	1.49	0.33	1.13	0.38	0.10	0.40	0.26	0.30
b1621	JW1613	gene1657	malX	30.00	7.81	0.43	0.50	-1.05	0.23	-0.89	0.41	2.65	0.76	2.83	0.26	3.10	0.36	0.32	0.31	0.33	0.32	0.26	0.30	-0.31	0.25
b1622	JW1614	gene1658	malY	135.33	22.98	0.05	0.28	-1.48	0.12	-0.57	0.19	0.78	0.55	0.71	0.19	1.01	0.27	0.10	0.18	-0.06	0.21	0.29	0.16	-0.03	0.23
b1623	JW1615	gene1659	add	616.33	116.90	0.06	0.23	0.26	0.14	-0.92	0.14	-0.08	0.33	0.26	0.17	-0.08	0.20	-1.10	0.15	-0.55	0.23	0.02	0.13	0.06	0.16
b0171	JW0166	gene166	pyrH	213.00	27.30	0.13	0.27	3.19	0.10	2.60	0.13	1.91	0.42	1.39	0.18	1.85	0.22	-0.54	0.17	-0.23	0.19	0.04	0.15	0.12	0.16
b1624	JW5265	gene1660	ydgJ	417.00	66.73	0.24	0.22	-1.16	0.08	-1.53	0.15	-1.48	0.21	-1.42	0.17	-1.51	0.21	-0.72	0.14	-0.70	0.17	-0.27	0.13	-0.23	0.14
b4409	JW5963	gene1661	blr	23.67	0.33	0.37	0.59	0.69	0.25	1.30	0.32	1.29	0.50	2.28	0.29	0.51	0.48	-0.10	0.35	-0.36	0.40	0.30	0.35	-0.24	0.30
b1625	JW1617	gene1662	cnu	6.33	0.88	2.05	0.66	2.91	0.37	3.84	0.41	2.90	0.63	3.66	0.41	1.14	0.66	2.17	0.45	2.01	0.47	1.82	0.44	1.21	0.38
b1626	JW1618	gene1663	ydgK	31.33	8.11	1.60	0.51	2.97	0.20	3.00	0.23	2.20	0.58	1.98	0.32	-0.33	0.41	-0.08	0.34	0.62	0.34	1.34	0.28	0.95	0.26
b1627	JW1619	gene1664	rsxA	12.00	3.51	2.08	0.48	4.48	0.26	4.05	0.30	3.14	0.54	1.70	0.41	0.34	0.47	-0.10	0.49	-0.07	0.49	0.52	0.43	0.58	0.31
b1628	JW1620	gene1665	rsxB	9.00	1.00	1.34	0.55	4.58	0.30	4.14	0.33	3.29	0.58	1.92	0.43	1.19	0.52	-0.90	0.60	-0.03	0.55	0.55	0.46	0.59	0.34
b1629	JW1621	gene1666	rsxC	25.33	8.84	1.42	0.47	4.84	0.20	3.93	0.23	3.21	0.60	2.84	0.28	2.19	0.36	-0.87	0.40	0.17	0.43	0.94	0.30	0.72	0.31
b1630	JW1622	gene1667	rsxD	24.00	7.37	0.64	0.48	3.86	0.19	3.29	0.24	2.62	0.56	1.62	0.32	1.27	0.40	-1.02	0.40	-0.69	0.48	-0.14	0.35	-0.11	0.27
b1631	JW1623	gene1668	rsxG	8.67	2.19	0.32	0.71	4.21	0.30	3.62	0.36	2.90	0.68	1.69	0.47	1.55	0.45	-0.53	0.59	-0.46	0.57	0.49	0.48	0.50	0.34
b1632	JW1624	gene1669	rsxE	12.67	2.03	0.37	0.56	3.78	0.25	3.71	0.30	2.82	0.63	1.67	0.40	1.76	0.38	-1.08	0.53	-0.07	0.49	0.42	0.41	-0.08	0.31
b0172	JW0167	gene167	frr	1572.67	253.49	-0.35	0.18	1.34	0.09	1.20	0.10	0.74	0.24	0.54	0.14	0.55	0.17	0.33	0.11	0.35	0.14	0.35	0.10	0.25	0.13
b1633	JW1625	gene1670	nth	6.00	1.00	1.40	0.62	5.27	0.35	4.89	0.38	3.99	0.59	2.73	0.46	2.59	0.46	0.20	0.60	-0.26	0.64	0.62	0.53	0.39	0.39
b1634	JW1626	gene1671	dtpA	171.33	25.12	0.98	0.34	3.61	0.10	3.75	0.12	3.09	0.27	2.93	0.16	1.44	0.29	-0.87	0.18	0.01	0.26	0.72	0.15	0.40	0.25
b1635	JW1627	gene1672	gstA	954.67	157.71	-0.66	0.29	-4.20	0.12	-3.85	0.17	-3.59	0.23	-3.24	0.17	-2.25	0.27	0.03	0.15	-0.04	0.17	-0.08	0.12	-0.17	0.15
b1636	JW1628	gene1673	pdxY	46.00	4.36	0.47	0.57	1.92	0.15	1.99	0.21	2.01	0.27	2.15	0.22	2.14	0.31	-0.03	0.26	0.52	0.30	0.72	0.23	-0.02	0.28
b1637	JW1629	gene1674	tyrS	804.00	145.23	0.15	0.20	1.16	0.09	0.81	0.12	0.56	0.23	0.62	0.14	0.00	0.18	-0.87	0.15	-0.42	0.18	0.02	0.11	-0.09	0.13
b1638	JW1630	gene1675	pdxH	172.00	28.43	0.24	0.31	0.33	0.11	0.19	0.17	0.17	0.22	0.35	0.18	1.13	0.23	-0.06	0.17	0.08	0.20	0.43	0.15	0.03	0.17
b1639	JW1631	gene1676	mliC	23.33	5.24	0.05	0.53	0.28	0.25	-1.74	0.53	-0.57	0.43	-1.03	0.46	-0.70	0.42	0.10	0.35	-0.58	0.40	-0.57	0.37	-0.04	0.27
b1640	JW1632	gene1677	anmK	99.00	18.25	0.13	0.44	-1.14	0.15	-1.96	0.27	-1.03	0.36	-0.12	0.21	0.10	0.23	0.01	0.20	-0.04	0.23	0.15	0.19	0.13	0.17
b1641	JW1633	gene1678	slyB	3420.00	546.48	-0.97	0.26	-1.60	0.12	0.04	0.12	-0.10	0.21	0.20	0.15	0.23	0.29	-0.12	0.13	0.03	0.15	-0.01	0.11	-0.26	0.14
b1642	JW5267	gene1679	slyA	291.33	39.01	-0.66	0.31	0.02	0.12	-1.00	0.17	-0.88	0.24	-0.69	0.18	-0.23	0.21	0.35	0.15	0.25	0.19	0.25	0.14	0.02	0.18
b0173	JW0168	gene168	dxr	284.00	47.38	-0.22	0.24	0.15	0.09	-0.45	0.19	-0.93	0.27	-1.10	0.18	-1.10	0.22	-0.81	0.17	-0.75	0.18	-0.66	0.14	-0.26	0.15
b1643	JW1635	gene1680	ydhI	8.33	3.18	-0.33	0.76	1.28	0.35	2.45	0.43	2.11	0.54	1.25	0.53	0.87	0.57	0.22	0.55	0.63	0.55	0.17	0.52	-0.34	0.40
b1644	JW1636	gene1681	ydhJ	15.67	2.96	0.74	0.54	1.58	0.26	2.21	0.34	1.85	0.50	0.93	0.38	0.37	0.42	0.23	0.40	0.28	0.41	0.48	0.38	-0.03	0.30
b1645	JW1637	gene1682	ydhK	32.00	8.08	-0.46	0.51	0.73	0.21	1.19	0.28	0.79	0.47	0.22	0.32	0.09	0.34	-0.45	0.33	-0.39	0.38	0.32	0.30	0.13	0.24
b1646	JW1638	gene1683	sodC	2045.67	325.46	-1.62	0.39	-6.14	0.11	-6.13	0.19	-6.23	0.28	-5.75	0.19	-4.42	0.40	-1.43	0.13	-0.55	0.15	-0.39	0.11	-0.01	0.13
b1647	JW1639	gene1684	ydhF	752.33	133.05	-0.36	0.31	-2.56	0.10	-2.11	0.14	-1.74	0.27	-1.30	0.15	-0.73	0.20	-0.65	0.13	-0.56	0.15	-0.65	0.12	-0.54	0.14
b1648	JW5827	gene1685	ydhL	73.33	12.84	-0.77	0.47	-4.31	0.23	-5.96	0.81	-3.66	0.48	-2.74	0.35	-1.78	0.33	0.62	0.21	-0.26	0.29	-0.28	0.23	-0.65	0.26
b1649	JW5874	gene1686	nemR	36.33	5.84	-0.38	0.46	0.33	0.23	-0.14	0.32	-0.64	0.38	-0.74	0.34	-0.91	0.39	0.67	0.26	0.08	0.35	-0.30	0.31	-0.15	0.23
b1650	JW1642	gene1687	nemA	106.67	16.95	-0.34	0.35	1.17	0.15	0.19	0.19	0.07	0.24	-0.07	0.21	0.02	0.23	0.92	0.17	0.99	0.20	0.01	0.18	-0.03	0.19
b1651	JW1643	gene1688	gloA	187.67	29.83	-1.26	0.40	0.21	0.13	0.24	0.16	0.58	0.22	0.84	0.18	1.41	0.21	0.91	0.17	1.02	0.19	0.47	0.16	0.58	0.17
b1652	JW1644	gene1689	rnt	48.67	12.68	1.36	0.49	2.06	0.16	2.30	0.21	1.77	0.45	0.91	0.26	0.32	0.31	-1.22	0.32	-0.15	0.34	0.45	0.24	0.07	0.23
b0174	JW0169	gene169	ispU	281.33	42.56	0.51	0.37	2.02	0.09	1.39	0.13	1.01	0.27	0.22	0.19	-0.12	0.22	-0.88	0.16	-0.87	0.20	-0.66	0.15	-0.42	0.14
b1653	JW1645	gene1690	lhr	301.67	55.19	0.01	0.24	-2.39	0.17	-2.76	0.21	-2.53	0.27	-1.99	0.21	-0.80	0.24	-1.03	0.17	-0.42	0.20	0.07	0.15	0.00	0.18
b1654	JW1646	gene1691	grxD	547.00	107.19	-1.05	0.40	0.20	0.10	0.57	0.13	0.35	0.29	0.06	0.16	-0.17	0.18	-0.84	0.14	-0.53	0.22	0.19	0.12	0.15	0.16
b1655	JW5270	gene1692	mepH	35.33	2.85	0.85	0.42	2.12	0.17	1.63	0.25	2.29	0.36	2.12	0.27	2.47	0.29	1.05	0.26	1.35	0.33	1.41	0.25	0.59	0.22
b1656	JW1648	gene1693	sodB	1967.33	429.33	-0.92	0.78	-1.72	0.16	-0.55	0.14	0.19	0.24	0.67	0.17	1.19	0.24	2.33	0.15	2.50	0.18	2.19	0.13	1.79	0.21
b1657	JW1649	gene1694	ydhP	56.33	5.67	1.26	0.42	0.01	0.16	-0.71	0.29	-1.92	0.50	-2.16	0.36	-3.10	0.47	-2.17	0.32	-1.76	0.33	-1.27	0.29	-0.68	0.22
b4602	Null	gene1695	ynhF	23.67	3.84	-0.52	0.66	-2.56	0.33	-2.89	0.65	-2.23	0.56	-2.05	0.49	-0.05	0.37	1.50	0.29	1.28	0.32	1.19	0.29	1.12	0.40
b1658	JW1650	gene1696	purR	111.00	17.79	0.68	0.27	2.76	0.11	2.88	0.14	1.98	0.50	1.51	0.19	1.12	0.42	-1.41	0.22	-0.63	0.29	0.33	0.17	0.17	0.17
b1659	JW1651	gene1697	ydhB	84.67	15.01	0.12	0.31	-1.38	0.17	-1.39	0.26	-1.30	0.30	-1.07	0.25	-0.85	0.26	-0.26	0.21	0.05	0.23	0.22	0.19	0.24	0.19
b1660	JW1652	gene1698	ydhC	129.33	29.85	2.02	0.76	0.61	0.16	0.06	0.20	-0.04	0.31	-0.01	0.29	-0.45	0.47	0.38	0.19	1.12	0.27	1.54	0.19	0.97	0.37
b1661	JW1653	gene1699	cfa	14589.67	2475.03	-1.22	0.39	-5.93	0.13	-5.32	0.12	-5.43	0.24	-4.92	0.16	-3.47	0.20	-1.79	0.13	-0.99	0.19	-0.64	0.11	-0.33	0.15
b0175	JW5810	gene170	cdsA	350.00	50.76	-0.25	0.24	0.85	0.09	0.35	0.14	-0.01	0.29	-0.59	0.17	-0.73	0.21	-1.17	0.15	-1.24	0.19	-1.03	0.14	-0.61	0.14
b1662	JW1654	gene1700	ribC	334.33	75.30	-0.42	0.29	-0.32	0.17	-0.11	0.17	0.18	0.25	0.43	0.19	0.43	0.23	0.57	0.18	0.26	0.23	0.05	0.15	-0.01	0.19
b1663	JW1655	gene1701	mdtK	219.33	26.69	-0.08	0.28	-0.40	0.11	-0.51	0.16	-1.40	0.55	-1.12	0.19	-1.47	0.28	-0.81	0.17	-0.57	0.19	-0.54	0.15	-0.12	0.21
b1664	JW1656	gene1702	ydhQ	1295.00	232.26	-0.80	0.29	-2.77	0.10	-2.98	0.14	-2.18	0.29	-2.06	0.16	-1.86	0.29	-0.57	0.15	-0.22	0.16	-0.18	0.11	0.38	0.15
b1667	JW1657	gene1705	ydhR	718.67	153.78	-1.60	0.34	-1.38	0.17	-1.41	0.17	-1.93	0.49	-2.04	0.20	-1.27	0.26	0.83	0.17	0.29	0.25	-0.09	0.16	-0.58	0.22
b1668	JW1658	gene1706	ydhS	648.00	109.23	-1.15	0.29	-4.77	0.12	-5.70	0.28	-5.55	0.35	-5.44	0.27	-3.31	0.52	-0.12	0.14	0.31	0.19	0.08	0.13	0.16	0.17
b1669	JW1659	gene1707	ydhT	4.33	2.60	0.83	0.80	0.23	0.59	0.04	0.96	-0.54	1.01	0.05	0.94	1.85	0.74	2.23	0.55	1.66	0.60	1.09	0.58	0.70	0.43
b1670	JW1660	gene1708	ydhU	13.00	2.65	0.18	0.60	-1.91	0.35	-2.50	0.78	-1.52	0.64	-0.55	0.54	0.66	0.48	1.69	0.35	1.09	0.40	0.22	0.41	0.32	0.30
b1671	JW5271	gene1709	ydhX	6.67	2.96	0.36	0.78	-2.63	0.60	-3.81	1.45	-2.40	1.24	-0.32	0.75	1.88	0.64	2.69	0.43	2.18	0.47	0.84	0.51	0.33	0.40
b0176	JW0171	gene171	rseP	935.33	137.54	-0.59	0.20	0.47	0.08	0.08	0.11	-0.04	0.20	-0.72	0.15	-0.60	0.17	-0.81	0.13	-0.95	0.16	-0.58	0.12	-0.31	0.13
b1672	JW1662	gene1710	ydhW	8.00	1.53	1.27	0.57	-1.75	0.46	-0.99	0.74	-1.40	0.75	0.29	0.57	2.14	0.52	3.03	0.37	2.12	0.42	0.95	0.45	0.51	0.36
b1673	JW5272	gene1711	ydhV	8.00	2.08	-0.31	0.74	-1.67	0.46	-1.82	0.86	-0.74	0.78	2.27	0.44	4.30	0.52	5.34	0.33	4.53	0.35	2.54	0.37	0.94	0.42
b1674	JW1664	gene1712	ydhY	0.00	0.00	NA	NA	3.32	2.06	2.65	2.45	1.34	2.07	6.49	1.74	8.13	1.20	8.33	0.90	6.57	0.78	4.22	0.72	1.49	0.50
-	-	gene1713	ydhZ	40.00	8.74	-1.14	0.51	-2.03	0.22	-1.08	0.36	0.00	0.43	-0.61	0.32	-0.18	0.41	1.31	0.24	1.03	0.27	0.56	0.25	0.69	0.24
b1676	JW1666	gene1714	pykF	9688.33	1572.81	-1.34	0.27	-0.85	0.11	-0.60	0.10	-0.86	0.19	-0.93	0.15	-0.33	0.26	-1.93	0.12	-1.28	0.19	-0.96	0.11	-0.73	0.14
b1677	JW1667	gene1715	lpp	7647.67	603.46	-3.04	0.49	-1.74	0.26	0.03	0.32	-0.96	0.46	-0.80	0.25	0.39	0.34	0.64	0.35	-0.25	0.27	-0.43	0.37	-0.68	0.39
b1678	JW1668	gene1716	ldtE	2728.33	443.53	-1.24	0.42	-6.70	0.16	-6.00	0.18	-6.12	0.30	-5.18	0.18	-3.13	0.45	-0.67	0.13	-0.31	0.17	-0.38	0.11	-0.16	0.15
b1679	JW1669	gene1717	sufE	106.00	16.09	-0.15	0.47	-2.06	0.19	-1.64	0.25	-2.21	0.33	-3.74	0.35	-2.54	0.49	0.11	0.19	1.07	0.24	0.70	0.17	0.33	0.17
b1680	JW1670	gene1718	sufS	607.33	115.77	-0.06	0.38	-3.30	0.17	-2.54	0.16	-3.49	0.37	-4.68	0.23	-3.46	0.38	-0.94	0.16	0.37	0.22	0.04	0.12	0.26	0.16
b1681	JW1671	gene1719	sufD	1330.67	261.32	-0.80	0.32	-4.05	0.16	-2.92	0.13	-3.80	0.42	-5.17	0.20	-4.08	0.45	-1.28	0.14	-0.16	0.19	-0.28	0.11	-0.19	0.13
b0177	JW0172	gene172	bamA	2699.00	386.71	-0.54	0.18	0.83	0.08	0.65	0.09	0.51	0.15	0.16	0.12	0.27	0.16	-0.23	0.12	-0.45	0.14	-0.39	0.11	-0.27	0.14
b1682	JW1672	gene1720	sufC	579.67	117.85	-0.90	0.36	-3.48	0.16	-2.98	0.17	-3.68	0.27	-5.82	0.29	-4.20	0.42	-1.44	0.16	-0.33	0.25	-0.47	0.13	-0.03	0.14
b1683	JW5273	gene1721	sufB	2176.00	380.73	-0.70	0.37	-4.16	0.12	-3.27	0.13	-3.92	0.41	-5.81	0.20	-4.29	0.55	-1.27	0.13	-0.50	0.18	-0.61	0.11	-0.38	0.13
b1684	JW1674	gene1722	sufA	367.67	52.85	-0.47	0.47	-4.15	0.13	-4.17	0.24	-4.79	0.35	-5.99	0.36	-3.35	0.45	-0.27	0.16	0.49	0.17	0.11	0.13	0.54	0.19
b1685	JW1675	gene1724	ydiH	446.67	93.89	-0.11	0.30	-4.20	0.17	-4.61	0.27	-4.64	0.39	-4.66	0.27	-2.17	0.30	-2.14	0.19	-1.71	0.23	-0.04	0.15	0.41	0.20
b1686	JW1676	gene1725	menI	28.33	6.49	0.11	0.48	-0.51	0.22	-1.00	0.43	-0.46	0.39	-0.30	0.35	-0.06	0.37	0.47	0.31	0.49	0.33	0.71	0.29	0.83	0.26
b1687	JW1677	gene1726	ydiJ	299.67	55.57	-0.05	0.28	-1.26	0.11	-0.88	0.16	-0.76	0.24	-0.38	0.18	-0.33	0.22	0.38	0.14	0.50	0.17	0.71	0.13	0.35	0.18
b1688	JW1678	gene1727	ydiK	378.33	43.76	-0.10	0.31	-1.30	0.10	-1.13	0.15	-1.26	0.27	-1.34	0.17	-1.33	0.24	-0.56	0.15	-0.27	0.17	0.05	0.13	0.23	0.14
b1689	JW1679	gene1729	ydiL	1.33	0.33	0.12	0.79	-0.27	0.89	-1.55	1.76	1.18	1.07	1.85	1.01	3.20	0.80	1.89	0.84	0.73	0.88	0.50	0.78	0.10	0.51
b0178	JW0173	gene173	skp	1046.00	142.92	-0.45	0.23	0.83	0.08	0.57	0.10	0.62	0.17	0.44	0.14	0.59	0.16	0.11	0.13	-0.02	0.15	-0.39	0.11	-0.40	0.14
b1690	JW1680	gene1730	ydiM	0.00	0.00	NA	NA	4.02	2.02	NA	NA	3.35	1.97	3.45	2.09	2.29	1.65	1.89	1.26	1.88	0.99	0.30	0.49	0.40	0.38
b1691	JW5274	gene1731	ydiN	0.67	0.33	-0.06	0.65	-0.63	1.28	0.14	1.82	-0.13	1.62	-0.38	1.78	0.58	1.37	1.36	1.06	0.76	0.97	-0.11	0.77	0.14	0.50
b1692	JW1682	gene1732	ydiB	3.33	1.45	0.14	0.81	0.12	0.58	0.17	0.95	-0.90	1.04	0.64	0.83	0.23	0.82	-0.56	0.90	0.68	0.72	-0.36	0.74	0.27	0.47
b1693	JW1683	gene1733	aroD	78.67	20.04	0.05	0.42	-0.72	0.24	-0.66	0.29	-0.15	0.45	0.15	0.29	-0.50	0.33	0.01	0.25	-0.07	0.29	0.07	0.23	-0.11	0.25
b1694	JW1684	gene1734	ydiF	3.00	1.73	0.00	0.80	0.78	0.59	0.34	1.03	0.72	1.13	-0.12	1.04	-1.33	1.21	-1.25	1.01	-0.73	0.92	-1.58	0.80	-0.61	0.51
b1695	JW5275	gene1735	ydiO	1.33	0.67	0.75	0.80	1.47	0.79	0.73	1.31	1.49	1.07	1.88	0.98	1.99	0.91	0.74	0.96	0.50	0.93	0.96	0.75	0.17	0.51
b1696	JW1686	gene1736	ydiP	14.33	5.36	0.38	0.71	-0.31	0.32	-0.63	0.57	0.30	0.63	0.43	0.48	1.09	0.45	1.94	0.37	1.38	0.40	0.93	0.38	0.65	0.32
b1697	JW5276	gene1737	ydiQ	8.33	2.73	-2.00	0.81	-2.23	0.49	-3.30	1.15	-2.15	0.96	-1.53	0.76	-0.84	0.72	-0.11	0.56	0.17	0.55	-0.05	0.52	-0.26	0.39
b1698	JW1688	gene1738	ydiR	17.00	3.51	-0.44	0.59	-2.66	0.34	-2.69	0.72	-1.94	0.63	-1.35	0.52	-1.24	0.56	0.13	0.39	0.08	0.42	0.07	0.38	0.10	0.28
b1699	JW1689	gene1739	ydiS	11.33	2.40	0.63	0.71	-1.65	0.38	-1.97	0.74	-2.20	0.75	-1.89	0.69	-1.23	0.63	-0.54	0.51	-0.17	0.50	0.18	0.45	-0.04	0.37
b0179	JW0174	gene174	lpxD	1742.33	262.76	-0.22	0.19	0.68	0.07	0.98	0.09	0.58	0.24	-0.07	0.14	-0.36	0.16	-0.93	0.12	-0.84	0.15	-0.52	0.10	-0.37	0.12
b1700	JW1690	gene1740	ydiT	0.33	0.33	-0.09	0.49	1.20	1.45	-1.51	2.51	0.05	2.05	-1.54	2.21	-1.00	1.52	0.30	1.26	0.57	0.98	0.69	0.78	0.66	0.49
b1701	JW5910	gene1741	fadK	10.33	2.73	0.65	0.62	-1.18	0.42	-1.60	0.75	-1.25	0.71	-1.03	0.63	-1.03	0.67	-0.46	0.53	-0.36	0.62	-0.20	0.50	-0.16	0.37
b1702	JW1692	gene1742	ppsA	2854.67	533.38	-0.19	0.19	-3.39	0.12	-3.59	0.13	-4.72	0.32	-2.45	0.18	-0.60	0.19	0.13	0.13	0.19	0.15	0.33	0.12	0.01	0.19
b1703	JW1693	gene1743	ppsR	252.33	37.55	-0.44	0.24	-2.26	0.12	-1.58	0.17	-1.60	0.31	-0.78	0.19	-0.39	0.25	0.62	0.15	0.80	0.17	0.54	0.13	0.19	0.15
b1704	JW1694	gene1744	aroH	115.67	21.17	1.36	0.41	2.09	0.13	2.01	0.15	1.03	0.44	0.34	0.22	-0.70	0.26	-1.37	0.22	1.07	0.74	1.74	0.15	0.59	0.27
b1705	JW1695	gene1745	ydiE	3.67	0.67	1.85	0.73	2.73	0.46	3.97	0.51	2.58	0.71	-1.68	1.07	-1.36	1.02	-2.96	1.09	-2.28	0.94	-2.39	0.80	-2.35	0.51
b1706	JW1696	gene1746	ydiU	180.00	32.35	0.27	0.29	1.13	0.10	0.52	0.15	0.31	0.32	-0.26	0.18	-0.58	0.30	-0.50	0.18	-0.11	0.20	0.04	0.15	0.21	0.15
-	-	gene1747	ydiV	20.33	1.76	-0.22	0.57	1.40	0.24	0.73	0.36	0.52	0.39	0.88	0.41	1.94	0.31	2.48	0.27	2.11	0.30	1.58	0.30	0.34	0.35
b1708	JW1698	gene1748	nlpC	125.67	19.10	-0.25	0.32	-0.81	0.14	-0.63	0.20	-0.12	0.28	0.31	0.19	0.92	0.21	1.18	0.18	1.07	0.22	0.99	0.16	0.74	0.16
b1709	JW1699	gene1749	btuD	178.33	32.77	-0.24	0.34	-1.77	0.12	-1.72	0.21	-2.14	0.26	-1.56	0.21	-0.76	0.25	-1.22	0.19	-0.17	0.26	0.09	0.16	0.26	0.20
b0180	JW0175	gene175	fabZ	720.00	108.70	-0.70	0.24	1.48	0.12	1.31	0.12	0.76	0.34	0.07	0.17	0.09	0.25	-0.86	0.14	-1.18	0.18	-0.84	0.14	-0.65	0.16
b1710	JW1700	gene1750	btuE	505.00	104.55	-0.91	0.38	-2.87	0.16	-3.39	0.21	-3.04	0.28	-2.75	0.21	-1.80	0.26	-1.62	0.17	-0.85	0.27	-0.58	0.15	-0.22	0.20
b1711	JW1701	gene1751	btuC	33.00	4.58	0.84	0.47	1.12	0.19	0.69	0.29	0.67	0.36	0.18	0.33	0.87	0.30	0.02	0.29	0.51	0.31	0.95	0.26	0.65	0.26
b1712	JW1702	gene1752	ihfA	1076.33	131.84	-0.79	0.28	-0.15	0.09	-0.41	0.11	-0.66	0.27	-0.83	0.14	-0.25	0.17	1.11	0.13	1.25	0.15	0.75	0.11	0.82	0.16
b1713	JW1703	gene1753	pheT	2287.67	390.72	-0.07	0.32	1.28	0.11	1.21	0.10	0.63	0.29	0.75	0.21	0.63	0.18	-0.58	0.12	-0.34	0.16	-0.10	0.11	0.15	0.16
b1714	JW5277	gene1754	pheS	725.00	109.41	-0.04	0.30	1.89	0.11	1.97	0.10	1.31	0.28	1.21	0.16	0.83	0.24	-1.38	0.13	-1.03	0.17	-0.44	0.12	-0.31	0.16
b1715	JW1705	gene1755	pheM	19.00	2.65	-0.18	0.68	0.88	0.26	1.32	0.35	0.71	0.41	-0.27	0.43	0.19	0.41	-1.63	0.48	-2.08	0.53	-1.51	0.47	-1.11	0.33
b1716	JW1706	gene1756	rplT	2784.33	437.49	-0.62	0.19	2.32	0.10	1.79	0.10	1.32	0.34	0.62	0.16	0.59	0.27	-1.26	0.13	-1.17	0.21	-0.11	0.12	0.24	0.20
b1717	JW1707	gene1757	rpmI	3052.33	408.46	-1.52	0.18	1.97	0.07	1.75	0.09	1.36	0.30	0.55	0.15	0.52	0.25	-1.19	0.12	-1.15	0.19	-0.19	0.11	-0.42	0.17
b1718	JW5829	gene1758	infC	6737.33	907.11	-0.73	0.17	1.65	0.08	1.12	0.09	0.71	0.30	0.00	0.13	-0.02	0.23	-0.60	0.12	-0.94	0.15	-0.26	0.11	-0.21	0.17
b1719	JW1709	gene1759	thrS	3900.67	620.50	-0.53	0.20	0.89	0.09	0.84	0.10	0.55	0.20	0.43	0.13	0.78	0.18	1.46	0.15	0.53	0.19	0.15	0.11	-0.07	0.18
b0181	JW0176	gene176	lpxA	598.33	90.01	0.02	0.28	1.40	0.07	1.22	0.11	0.63	0.37	0.28	0.17	0.34	0.20	-0.83	0.14	-0.66	0.16	-0.45	0.13	-0.30	0.13
-	-	gene1760	arpB	5.33	0.88	-0.63	0.78	-1.10	0.50	-1.90	1.05	-2.29	1.04	-2.55	1.07	-1.17	0.83	-0.06	0.67	0.11	0.65	0.21	0.58	0.03	0.42
b4535	JW5911	gene1761	yniD	2.67	0.33	1.13	0.80	-0.61	0.68	0.14	1.02	0.65	0.84	0.03	0.98	0.08	0.90	0.52	0.78	-0.22	0.88	0.80	0.66	0.29	0.47
b1722	JW1711	gene1762	ydiY	1.00	0.58	4.04	0.67	10.97	0.74	7.91	0.77	6.18	0.93	4.86	0.84	2.84	0.96	1.80	0.92	0.70	0.93	0.86	0.78	0.84	0.50
b1723	JW5280	gene1763	pfkB	1268.33	204.01	-1.21	0.35	-4.97	0.11	-3.78	0.14	-3.11	0.31	-2.15	0.14	-1.15	0.31	-0.14	0.12	0.38	0.20	0.44	0.10	0.10	0.12
b1724	JW1713	gene1764	ydiZ	563.00	123.41	-0.98	0.43	-5.52	0.24	-7.11	0.46	-5.62	0.40	-4.84	0.27	-3.22	0.39	-0.90	0.18	-0.61	0.23	-0.53	0.17	0.17	0.22
b1725	JW1714	gene1765	yniA	2252.67	381.08	-1.33	0.29	-7.30	0.11	-6.84	0.22	-5.55	0.55	-3.97	0.16	-1.66	0.20	-0.19	0.12	-0.39	0.14	-0.25	0.10	-0.20	0.12
b1726	JW1715	gene1766	yniB	213.00	38.02	-0.38	0.31	-0.43	0.14	-0.85	0.18	-1.07	0.31	-1.44	0.22	-1.45	0.30	-0.84	0.18	-0.99	0.22	-0.59	0.17	-0.22	0.20
-	-	gene1767	yniC	48.00	11.02	0.97	0.51	1.78	0.17	2.53	0.20	2.34	0.26	2.59	0.21	2.01	0.28	1.40	0.22	1.27	0.26	1.13	0.22	0.51	0.21
b1728	JW5281	gene1768	ydjM	5.33	1.33	1.16	0.69	3.36	0.38	3.29	0.48	2.63	0.52	1.25	0.60	1.33	0.56	1.19	0.55	0.99	0.56	0.88	0.53	-0.14	0.42
b1729	JW1718	gene1769	ydjN	1321.67	218.55	-1.88	0.29	-1.30	0.14	-0.20	0.12	-0.50	1.04	-2.46	0.30	-0.03	0.18	-3.55	0.15	-0.85	0.62	-1.20	0.11	-1.09	0.13
b0182	JW0177	gene177	lpxB	235.00	27.02	0.53	0.23	1.57	0.10	1.76	0.13	1.10	0.38	0.55	0.17	0.74	0.19	-0.36	0.17	-0.32	0.20	0.18	0.15	0.06	0.17
b1730	JW1719	gene1770	ydjO	3.67	0.33	-1.33	0.79	-0.35	0.56	-2.17	1.28	-1.35	1.07	-4.99	1.91	-1.71	1.04	-1.11	0.87	-0.54	0.81	-0.20	0.68	-0.37	0.47
b1731	JW1720	gene1771	cedA	11.33	2.96	0.75	0.62	1.29	0.30	1.12	0.45	0.65	0.55	-0.36	0.53	-0.04	0.51	-0.52	0.53	-0.72	0.56	-0.42	0.49	0.46	0.32
b1732	JW1721	gene1772	katE	9779.67	1702.41	-1.61	0.39	-9.08	0.14	-9.12	0.23	-8.79	0.37	-6.75	0.17	-3.82	0.34	-2.70	0.12	-1.39	0.24	-1.06	0.12	-0.52	0.20
b1733	JW1722	gene1773	chbG	35.00	7.77	0.28	0.44	-0.47	0.22	-0.89	0.38	-0.74	0.40	-0.81	0.36	-0.14	0.35	0.10	0.30	0.04	0.33	0.00	0.29	0.27	0.24
b1734	JW1723	gene1774	chbF	14.00	3.00	-0.57	0.63	0.20	0.29	-1.13	0.59	-0.28	0.53	-0.72	0.51	0.14	0.47	0.15	0.43	0.03	0.46	0.15	0.41	-0.18	0.31
b1735	JW1724	gene1775	chbR	20.33	1.76	-1.01	0.60	0.60	0.23	-0.72	0.49	-0.17	0.44	-0.10	0.39	0.01	0.38	-0.11	0.37	-0.50	0.42	-0.50	0.38	-0.27	0.29
b1736	JW1725	gene1776	chbA	3.33	1.33	1.29	0.76	1.36	0.53	0.64	0.87	1.16	0.77	1.99	0.66	1.92	0.67	1.11	0.67	1.18	0.65	-0.20	0.70	0.60	0.44
b1737	JW1726	gene1777	chbC	18.00	2.08	-0.57	0.60	0.69	0.25	-0.51	0.46	-0.61	0.46	-0.71	0.45	-0.29	0.48	-0.47	0.42	-0.36	0.42	-0.86	0.43	-0.06	0.33
b1738	JW1727	gene1778	chbB	33.00	4.36	0.09	0.51	0.48	0.19	-0.85	0.37	0.07	0.42	-0.20	0.34	0.34	0.32	0.22	0.29	0.52	0.30	0.50	0.27	1.03	0.22
b1739	JW1728	gene1779	osmE	1521.00	285.82	-2.77	0.35	-6.41	0.17	-4.67	0.19	-3.59	0.34	-2.30	0.18	-0.53	0.45	2.23	0.15	2.33	0.21	1.66	0.14	1.34	0.19
b0183	JW0178	gene178	rnhB	39.67	10.91	0.68	0.40	2.71	0.17	2.43	0.22	1.86	0.45	1.19	0.26	1.29	0.29	-0.41	0.33	0.04	0.33	0.56	0.26	0.37	0.24
b1740	JW1729	gene1780	nadE	637.00	124.23	-0.35	0.31	-1.07	0.14	-0.92	0.15	-0.46	0.30	-0.49	0.18	-1.35	0.30	-0.45	0.16	-0.18	0.19	-0.26	0.14	-0.27	0.18
b1741	JW1730	gene1781	cho	46.33	8.11	1.02	0.35	-0.28	0.18	-0.53	0.30	-0.45	0.32	-0.56	0.29	-0.63	0.31	-0.78	0.29	-0.70	0.32	-0.09	0.26	-0.37	0.21
b1742	JW1731	gene1782	ves	3.33	0.33	1.47	0.73	-0.29	0.58	-0.87	1.07	-0.99	0.99	-1.01	1.00	-0.56	0.87	0.56	0.72	-0.06	0.75	0.07	0.68	0.14	0.46
b1743	JW1732	gene1783	spy	542.67	84.79	-1.27	0.33	-1.45	0.26	-4.36	0.21	-3.89	0.26	-3.26	0.19	-2.88	0.28	-1.91	0.15	-1.15	0.19	-1.20	0.13	-0.70	0.21
b1744	JW1733	gene1784	astE	570.67	95.43	-0.09	0.58	-6.63	0.15	-8.85	0.76	-7.57	0.60	-8.82	0.67	-8.42	0.64	-3.28	0.17	-3.87	0.31	-4.01	0.18	-0.77	0.49
b1745	JW1734	gene1785	astB	1767.67	286.83	0.20	0.57	-7.43	0.13	-10.10	0.67	-7.57	0.50	-8.62	0.38	-8.24	0.39	-3.67	0.15	-3.87	0.28	-4.09	0.14	-1.46	0.40
b1746	JW5282	gene1786	astD	1323.00	250.96	0.77	0.55	-7.15	0.19	-9.68	0.67	-7.63	0.43	-8.48	0.42	-7.81	0.40	-3.68	0.16	-3.41	0.30	-3.70	0.16	-0.85	0.49
b1747	JW1736	gene1787	astA	2208.33	338.77	-0.16	0.57	-8.25	0.14	-13.04	1.51	-7.80	0.64	-11.06	0.73	-9.86	0.55	-3.72	0.15	-4.13	0.21	-4.50	0.13	-0.96	0.50
b1748	JW1737	gene1788	astC	2833.00	509.16	0.27	0.58	-7.59	0.24	-9.57	0.46	-7.73	0.47	-9.79	0.45	-9.85	0.52	-3.58	0.17	-3.63	0.18	-4.11	0.13	-0.45	0.51
b1749	JW1738	gene1789	xthA	191.67	34.90	1.03	0.23	0.88	0.11	0.82	0.15	0.50	0.35	0.19	0.20	0.13	0.26	-1.13	0.19	-0.64	0.21	-0.33	0.17	0.11	0.19
b0184	JW0179	gene179	dnaE	538.00	80.41	-0.06	0.20	1.83	0.07	1.46	0.11	0.87	0.37	0.13	0.15	0.37	0.17	-1.06	0.14	-0.78	0.16	-0.27	0.12	0.05	0.14
b1750	JW1739	gene1790	ydjX	10.00	3.06	0.52	0.71	-0.20	0.35	-0.86	0.66	-1.15	0.68	3.22	0.37	2.66	0.41	2.19	0.37	2.02	0.44	2.50	0.34	0.90	0.44
b1751	JW5283	gene1791	ydjY	11.33	1.86	0.21	0.67	-1.03	0.35	-1.48	0.71	-1.10	0.61	4.77	0.32	4.81	0.55	3.17	0.34	2.88	0.36	2.72	0.31	1.26	0.41
b1752	JW1741	gene1792	ydjZ	23.33	2.60	-0.80	0.56	-1.89	0.27	-3.01	0.64	-1.96	0.52	2.26	0.28	2.35	0.53	0.79	0.31	1.01	0.34	1.07	0.29	0.72	0.28
b1753	JW1742	gene1793	ynjA	22.33	3.76	0.59	0.50	-1.81	0.30	-2.55	0.62	-3.40	0.74	1.40	0.36	1.19	0.40	-0.56	0.41	0.70	0.38	0.54	0.36	0.67	0.30
b1754	JW5284	gene1794	ynjB	80.67	14.81	0.03	0.32	-1.99	0.17	-2.18	0.31	-2.10	0.33	1.15	0.21	0.95	0.38	-0.48	0.23	0.20	0.30	0.63	0.19	0.36	0.18
b1755	JW5285	gene1795	ynjC	30.33	4.10	-0.25	0.50	-1.84	0.25	-2.11	0.49	-1.99	0.53	0.81	0.30	0.97	0.41	-0.66	0.34	-0.05	0.35	0.53	0.30	0.23	0.24
b1756	JW5286	gene1796	ynjD	22.33	2.67	-0.70	0.55	-1.29	0.28	-1.44	0.50	-0.98	0.45	0.47	0.40	0.71	0.34	-0.08	0.36	-0.48	0.39	0.40	0.32	0.14	0.30
b1757	JW5287	gene1797	ynjE	72.67	13.86	-0.18	0.66	-2.85	0.21	-2.27	0.34	-1.70	0.39	4.07	0.20	4.28	0.54	1.07	0.23	1.34	0.28	2.06	0.18	1.02	0.34
b1758	JW1747	gene1798	ynjF	41.33	6.06	0.03	0.44	-0.87	0.19	-0.72	0.33	-1.13	0.40	-1.34	0.35	-0.75	0.35	-0.29	0.28	-0.32	0.30	0.18	0.26	0.13	0.21
b1759	JW1748	gene1799	nudG	3.67	0.67	1.93	0.65	3.05	0.46	2.83	0.58	2.63	0.59	1.97	0.62	1.29	0.69	0.65	0.69	0.09	0.73	0.82	0.61	0.78	0.42
b0019	JW0018	gene18	nhaA	3082.00	455.94	-0.19	0.21	-3.55	0.10	-2.64	0.10	-3.27	0.56	-4.56	0.15	-4.73	0.25	-2.47	0.12	-2.24	0.14	-1.30	0.10	-0.53	0.14
b0185	JW0180	gene180	accA	330.67	54.34	1.13	0.21	2.01	0.08	1.76	0.11	1.68	0.25	1.32	0.16	0.81	0.19	-0.40	0.14	0.11	0.17	0.39	0.13	0.71	0.13
b1760	JW1749	gene1800	ynjH	51.33	8.29	-1.79	0.49	-3.90	0.24	-4.54	0.64	-2.79	0.45	-2.73	0.42	-1.56	0.37	0.18	0.25	0.15	0.26	-0.33	0.27	-0.18	0.21
b1761	JW1750	gene1801	gdhA	288.33	64.81	0.62	0.30	-0.56	0.14	-0.64	0.17	-0.30	0.28	-0.51	0.19	-0.58	0.26	1.50	0.15	1.69	0.23	1.10	0.14	0.72	0.19
b1762	JW5288	gene1802	ynjI	1.00	1.00	1.54	0.81	5.36	0.78	3.73	0.96	3.66	0.95	3.06	1.00	1.67	1.10	1.50	1.04	0.63	0.98	0.97	0.79	0.63	0.51
b1763	JW1752	gene1803	topB	204.33	31.80	0.59	0.30	1.77	0.09	1.85	0.13	1.59	0.24	1.49	0.16	1.11	0.18	0.67	0.15	0.77	0.17	0.90	0.14	0.24	0.23
b1764	JW1753	gene1804	selD	433.00	84.51	0.10	0.23	0.57	0.12	0.55	0.13	0.30	0.23	0.51	0.17	0.71	0.21	0.82	0.15	0.63	0.20	0.32	0.13	0.10	0.21
b1765	JW1754	gene1805	ydjA	74.00	12.49	1.55	0.34	0.34	0.15	-0.67	0.26	0.01	0.26	-0.07	0.29	-0.05	0.35	1.23	0.19	1.26	0.24	0.72	0.20	0.77	0.20
b1766	JW1755	gene1806	sppA	338.67	42.21	0.16	0.25	0.83	0.10	0.46	0.13	0.30	0.22	-0.08	0.16	-0.74	0.21	-0.69	0.15	-0.92	0.18	-0.30	0.13	-0.54	0.17
b1767	JW1756	gene1807	ansA	216.67	43.54	-0.19	0.28	1.25	0.13	1.33	0.14	0.78	0.31	0.23	0.19	0.16	0.36	-1.98	0.20	-1.07	0.25	-0.20	0.16	0.05	0.18
b1768	JW1757	gene1808	pncA	91.33	17.48	-0.41	0.35	1.54	0.14	1.32	0.18	0.81	0.33	0.73	0.21	0.81	0.29	-1.34	0.24	-0.40	0.29	0.25	0.19	0.21	0.17
b1769	JW1758	gene1809	ydjE	2.00	0.58	0.41	0.80	2.26	0.63	1.72	0.90	2.53	0.77	1.51	0.88	1.64	0.82	1.34	0.79	-0.37	0.92	0.82	0.71	0.40	0.49
b0186	JW0181	gene181	ldcC	664.33	144.20	-0.64	0.27	-3.20	0.14	-3.84	0.20	-3.43	0.27	-3.22	0.20	-1.75	0.45	0.82	0.15	0.99	0.18	0.16	0.13	0.25	0.17
b1770	JW1759	gene1810	ydjF	21.00	5.29	0.21	0.61	1.71	0.26	1.66	0.33	2.35	0.40	2.34	0.31	2.43	0.37	2.69	0.27	0.86	0.37	1.01	0.32	0.41	0.37
b1771	JW1760	gene1811	ydjG	4.67	0.88	0.44	0.73	1.17	0.45	-0.01	0.83	1.20	0.74	1.60	0.59	1.60	0.61	1.85	0.53	1.32	0.56	1.09	0.54	0.66	0.41
b1772	JW5289	gene1812	ydjH	4.33	1.86	-1.14	0.80	0.25	0.54	-1.12	1.00	0.19	0.89	0.57	0.75	1.00	0.70	0.45	0.67	0.30	0.69	-0.20	0.66	0.13	0.44
b1773	JW1762	gene1813	ydjI	7.67	3.18	-1.06	0.80	-0.63	0.45	-1.96	0.97	0.22	0.69	0.23	0.64	0.80	0.60	0.57	0.54	0.11	0.60	-0.27	0.57	-0.10	0.39
b1774	JW1763	gene1814	ydjJ	2.67	0.33	-0.16	0.81	-0.31	0.66	-1.30	1.32	0.48	0.97	0.54	0.88	0.94	0.81	-0.23	0.86	0.65	0.76	-0.10	0.72	-0.13	0.48
b1775	JW5290	gene1815	ydjK	4.67	1.67	-0.38	0.79	-1.30	0.57	-5.21	2.09	0.47	0.84	0.65	0.69	-0.03	0.74	0.22	0.67	0.22	0.67	0.46	0.59	-0.22	0.44
b1776	JW1765	gene1816	ydjL	10.33	3.33	0.13	0.66	-2.25	0.45	-2.71	0.93	0.62	0.68	0.51	0.49	0.25	0.52	0.10	0.50	0.36	0.51	-0.05	0.49	-0.02	0.36
b1777	JW1766	gene1817	yeaC	218.33	44.22	-0.73	0.41	-1.77	0.15	-1.74	0.20	-0.47	0.35	-1.24	0.21	-1.67	0.28	1.76	0.18	1.19	0.21	0.72	0.14	0.77	0.17
b1778	JW1767	gene1818	msrB	612.00	120.79	-0.85	0.27	-2.86	0.16	-2.13	0.17	-0.95	0.29	-1.77	0.19	-2.39	0.29	1.21	0.18	0.75	0.20	0.35	0.14	0.26	0.19
b1779	JW1768	gene1819	gapA	9079.33	1424.44	-0.44	0.18	0.45	0.10	1.45	0.10	1.92	0.26	2.28	0.15	1.99	0.16	0.35	0.15	0.44	0.15	0.72	0.11	0.11	0.20
b0187	JW0182	gene182	yaeR	64.00	11.59	0.01	0.43	-0.93	0.16	-1.38	0.31	-0.94	0.30	-1.51	0.30	-0.84	0.37	0.97	0.21	1.26	0.23	0.63	0.20	0.53	0.18
b1780	JW1769	gene1820	yeaD	107.00	27.43	-0.46	0.34	0.24	0.15	0.87	0.19	1.80	0.38	2.56	0.19	2.97	0.22	2.17	0.21	1.89	0.21	1.77	0.16	0.70	0.31
b1781	JW1770	gene1821	yeaE	127.33	19.97	-0.25	0.38	-1.41	0.14	-1.25	0.22	-0.85	0.25	-1.08	0.22	-0.85	0.23	-0.40	0.19	-0.35	0.21	-0.03	0.17	-0.29	0.21
b1782	JW1771	gene1822	mipA	424.67	78.08	-0.53	0.32	1.27	0.10	2.43	0.11	2.21	0.30	2.41	0.15	2.09	0.21	-0.08	0.16	0.15	0.19	0.90	0.12	0.58	0.18
b1783	JW1772	gene1823	yeaG	12600.33	2086.71	-1.09	0.33	-8.06	0.14	-9.28	0.44	-8.23	0.40	-7.01	0.21	-4.23	0.48	-1.03	0.13	-0.59	0.17	-0.87	0.11	-0.52	0.15
b1784	JW1773	gene1824	yeaH	1815.33	274.28	-0.50	0.29	-7.76	0.19	-8.69	0.42	-8.97	0.49	-7.02	0.25	-4.07	0.45	-0.88	0.13	-0.23	0.18	-0.50	0.11	-0.13	0.15
-	-	gene1825	yeaI	19.33	5.04	-0.34	0.61	-2.69	0.36	-5.37	1.27	-3.43	0.79	0.00	0.42	-1.82	0.66	-1.65	0.50	-0.76	0.46	-0.60	0.41	-0.48	0.31
b1786	JW5291	gene1826	yeaJ	122.33	20.20	-0.82	0.35	0.67	0.16	0.28	0.20	-0.31	0.40	0.13	0.22	-1.68	0.37	-2.52	0.26	-1.81	0.35	-0.43	0.19	-0.25	0.22
b1787	JW1776	gene1827	yeaK	63.00	10.07	0.27	0.35	0.88	0.15	0.88	0.22	0.66	0.27	1.14	0.23	1.57	0.24	1.31	0.20	1.22	0.22	1.22	0.19	0.62	0.23
b1788	Null	gene1828	yoaI	8.67	0.88	0.19	0.69	-1.88	0.42	-1.73	0.81	-1.89	0.89	-2.15	0.78	-1.56	0.75	-0.76	0.58	-0.58	0.59	-0.29	0.52	-0.09	0.37
b1789	JW1778	gene1829	yeaL	1.67	1.20	1.80	0.79	4.20	0.64	4.00	0.74	3.62	0.83	3.45	0.75	3.60	0.72	2.70	0.71	2.33	0.72	2.29	0.62	0.95	0.50
b0188	JW0183	gene183	tilS	72.33	20.37	1.38	0.31	1.24	0.17	0.35	0.26	0.17	0.33	0.43	0.28	0.07	0.33	-0.57	0.26	0.68	0.28	0.64	0.23	0.70	0.26
b1790	JW1779	gene1830	yeaM	54.33	5.17	0.00	0.47	-1.25	0.18	-1.15	0.32	-1.00	0.37	-0.97	0.30	-0.56	0.30	0.23	0.24	-0.09	0.29	0.01	0.24	0.01	0.21
b1791	JW1780	gene1831	yeaN	22.33	1.86	0.06	0.65	0.33	0.23	0.43	0.37	0.43	0.41	0.55	0.35	0.09	0.41	-0.60	0.38	-0.23	0.38	0.34	0.33	0.19	0.27
b1792	JW1781	gene1832	yeaO	201.67	34.84	-1.46	0.31	-3.65	0.14	-2.96	0.24	-2.67	0.28	-1.89	0.21	-1.02	0.21	0.56	0.15	0.48	0.20	0.43	0.14	0.12	0.16
b1793	JW1782	gene1833	yoaF	22.00	5.29	0.02	0.57	-0.12	0.26	-0.18	0.42	0.35	0.43	0.38	0.37	0.31	0.39	1.02	0.32	0.81	0.36	0.62	0.33	0.68	0.28
b1794	JW5292	gene1834	yeaP	145.33	22.23	1.25	0.46	0.49	0.10	0.11	0.17	0.17	0.28	-0.35	0.20	0.40	0.26	-0.29	0.18	-0.52	0.21	0.13	0.17	-0.17	0.20
b4676	Null	gene1835	yoaK	0.00	0.00	NA	NA	3.33	2.06	3.23	2.35	3.35	1.97	3.50	2.07	1.07	1.55	1.14	1.18	NA	NA	0.28	0.48	0.06	0.21
b4675	Null	gene1836	yoaJ	0.00	0.00	NA	NA	4.40	2.00	4.09	2.24	3.12	2.02	1.33	2.22	1.95	1.65	NA	NA	0.43	0.70	0.62	0.64	0.02	0.21
b1795	JW1784	gene1837	yeaQ	424.00	78.36	-1.79	0.45	-3.95	0.19	-3.83	0.23	-4.01	0.47	-3.29	0.25	-1.01	0.40	1.19	0.15	1.41	0.19	1.01	0.14	1.09	0.23
b1796	JW1785	gene1838	yoaG	0.33	0.33	-0.12	0.49	2.06	1.35	0.94	2.02	1.80	1.66	3.16	1.41	1.40	1.44	2.09	1.13	0.93	0.99	1.14	0.80	0.59	0.49
b1797	JW1786	gene1839	yeaR	0.00	0.00	NA	NA	4.11	2.01	3.98	2.23	4.12	1.92	6.23	1.76	2.67	1.63	3.06	1.22	1.16	0.93	0.58	0.62	0.78	0.46
b0189	JW0184	gene184	rof	255.67	40.48	-0.37	0.30	-2.40	0.12	-2.34	0.21	-1.75	0.25	-1.91	0.21	-1.43	0.31	0.07	0.17	0.08	0.19	-0.12	0.15	0.11	0.15
b1798	JW1787	gene1840	leuE	10.00	2.31	0.98	0.62	3.29	0.30	2.84	0.38	2.87	0.43	2.35	0.41	1.10	0.47	0.80	0.44	0.65	0.47	0.59	0.44	0.29	0.35
b1799	JW1788	gene1841	dmlR	131.33	27.55	0.26	0.33	-3.87	0.23	-3.30	0.33	-0.26	0.75	0.04	0.24	0.29	0.31	0.54	0.20	0.38	0.25	0.13	0.19	0.03	0.23
b1800	JW1789	gene1842	dmlA	187.67	29.76	-0.30	0.27	-4.42	0.15	-4.04	0.31	-3.63	0.34	-3.06	0.25	-2.15	0.26	-0.61	0.17	-0.14	0.19	-0.59	0.17	-0.60	0.17
b1801	JW5293	gene1843	yeaV	4.00	1.00	0.96	0.74	-1.37	0.64	-1.18	1.10	0.56	0.76	-0.25	0.88	-0.62	0.86	1.50	0.60	0.48	0.69	0.05	0.66	-0.60	0.46
b1802	JW5294	gene1844	yeaW	9.00	1.53	-0.01	0.69	-1.44	0.41	-3.46	1.11	-1.29	0.73	-1.14	0.66	-0.06	0.55	-0.59	0.57	0.06	0.52	-0.52	0.55	0.01	0.35
b1803	JW1792	gene1845	yeaX	27.00	3.51	-0.18	0.51	-2.41	0.26	-3.05	0.61	-2.17	0.52	-2.54	0.50	-2.11	0.51	-1.35	0.41	-1.61	0.43	-0.67	0.35	-0.26	0.25
b1804	JW1793	gene1846	rnd	57.33	13.17	1.44	0.45	3.31	0.14	2.78	0.18	1.86	0.52	0.96	0.24	0.50	0.35	-0.82	0.27	-1.03	0.30	-0.22	0.24	-0.38	0.21
b1805	JW1794	gene1847	fadD	1122.67	207.86	-0.42	0.47	-1.69	0.15	-1.58	0.15	-2.24	0.31	-3.42	0.20	-3.62	0.28	-2.05	0.17	-2.62	0.21	-2.66	0.16	-0.63	0.38
b1806	JW1795	gene1848	yeaY	202.33	31.18	-0.07	0.24	0.10	0.11	0.30	0.15	-0.21	0.47	-0.71	0.18	-0.81	0.40	0.06	0.17	0.01	0.21	0.46	0.15	0.22	0.14
b1807	JW1796	gene1849	tsaB	43.67	13.42	1.51	0.49	2.96	0.17	2.75	0.21	2.26	0.53	1.66	0.27	0.95	0.43	-1.74	0.36	-0.76	0.40	0.25	0.27	0.41	0.25
b4406	JW0185	gene185	yaeP	150.00	23.26	-1.01	0.33	-2.00	0.13	-2.03	0.23	-1.68	0.26	-1.38	0.23	-0.85	0.27	0.64	0.17	0.74	0.19	0.45	0.16	1.21	0.15
b1808	JW1797	gene1850	yoaA	133.67	20.80	0.63	0.29	0.38	0.13	0.31	0.18	0.01	0.28	0.14	0.20	-0.43	0.26	-1.12	0.22	-0.56	0.23	0.06	0.18	-0.24	0.17
b1809	JW5295	gene1851	yoaB	87.33	14.10	0.26	0.45	1.29	0.13	1.44	0.17	1.64	0.24	2.17	0.19	2.25	0.20	1.15	0.20	1.19	0.20	1.49	0.17	0.94	0.20
b1810	JW5296	gene1852	yoaC	273.00	63.29	-0.45	0.38	-2.33	0.21	-3.97	0.30	-4.13	0.40	-3.56	0.28	-2.04	0.30	-0.15	0.20	0.30	0.23	-0.32	0.19	0.09	0.26
b1811	JW1800	gene1853	yoaH	15.33	3.84	1.27	0.49	1.52	0.25	0.46	0.44	0.30	0.45	0.44	0.44	0.76	0.40	0.41	0.40	0.28	0.42	0.88	0.36	0.97	0.32
b1812	JW1801	gene1854	pabB	68.00	13.00	0.50	0.32	0.96	0.14	0.53	0.22	0.31	0.27	0.39	0.23	-0.34	0.38	-1.43	0.27	-0.90	0.27	0.12	0.22	0.11	0.18
b1813	JW1802	gene1855	nudL	52.67	9.53	0.88	0.35	-0.53	0.19	-0.47	0.29	-0.44	0.30	-0.61	0.32	0.21	0.32	0.37	0.24	0.66	0.25	0.87	0.22	0.95	0.21
b1814	JW1803	gene1856	sdaA	1559.00	260.58	-0.02	0.19	-0.32	0.09	-0.88	0.11	-0.96	0.19	-1.14	0.15	-1.21	0.25	-1.22	0.12	-0.62	0.21	-0.16	0.10	0.20	0.22
b1815	JW1804	gene1857	yoaD	515.00	74.66	-1.32	0.30	-5.02	0.13	-5.70	0.30	-5.61	0.34	-6.28	0.33	-4.50	0.28	-2.24	0.15	-1.48	0.20	-0.79	0.13	-0.52	0.16
b1816	JW1805	gene1858	yoaE	191.67	40.18	0.00	0.37	-0.48	0.13	-0.24	0.17	0.04	0.33	0.26	0.18	-0.20	0.26	-0.22	0.17	0.56	0.27	1.57	0.14	0.66	0.36
b1817	JW1806	gene1859	manX	341.33	54.34	0.35	0.24	0.09	0.10	0.63	0.12	3.81	0.74	2.70	0.16	4.25	0.16	2.81	0.15	2.17	0.15	1.41	0.12	0.57	0.21
b0190	JW0186	gene186	yaeQ	54.00	10.54	0.12	0.38	0.92	0.15	0.83	0.23	0.56	0.30	0.43	0.25	0.32	0.28	0.10	0.24	-0.17	0.28	-0.29	0.25	-0.18	0.21
b1818	JW1807	gene1860	manY	263.33	43.59	0.16	0.25	-0.17	0.11	0.94	0.13	3.89	0.72	2.74	0.17	4.22	0.18	2.87	0.15	2.17	0.16	1.48	0.12	0.52	0.24
b1819	JW1808	gene1861	manZ	248.67	31.93	0.30	0.30	0.00	0.12	0.66	0.13	3.63	0.71	2.68	0.17	4.10	0.19	2.80	0.15	2.24	0.16	1.52	0.13	0.79	0.18
b1820	JW1809	gene1862	yobD	9.33	1.76	0.62	0.65	1.72	0.34	1.40	0.47	3.08	0.73	1.71	0.45	2.57	0.41	-0.05	0.52	0.17	0.51	0.68	0.44	0.52	0.38
b1821	JW5830	gene1863	mntP	2.33	0.33	0.07	0.80	4.94	0.55	4.81	0.59	4.13	0.66	3.80	0.63	1.80	0.75	0.77	0.79	0.39	0.79	1.79	0.61	0.93	0.46
b1822	JW1811	gene1864	rlmA	48.67	7.86	1.61	0.46	2.56	0.15	2.05	0.20	1.49	0.43	0.41	0.26	-0.40	0.30	-1.20	0.30	-1.14	0.34	-0.13	0.25	-0.07	0.20
b1823	JW1812	gene1865	cspC	968.33	104.84	-0.82	0.27	-0.87	0.14	-0.33	0.13	0.81	0.35	1.41	0.16	1.19	0.22	0.38	0.14	0.43	0.22	0.43	0.13	0.08	0.17
b1824	JW1813	gene1866	yobF	795.67	153.46	-2.19	0.32	-1.51	0.17	-1.49	0.15	-0.01	0.42	0.58	0.18	0.39	0.24	0.19	0.15	0.33	0.27	0.30	0.15	0.23	0.18
b1825	JW1814	gene1867	yebO	18.00	5.13	1.83	0.53	4.67	0.22	4.10	0.26	3.68	0.42	2.37	0.32	1.59	0.40	0.46	0.37	-0.11	0.43	0.17	0.38	-0.33	0.34
b1826	JW1815	gene1868	mgrB	9.00	3.21	1.70	0.57	2.64	0.32	2.58	0.41	2.65	0.47	2.38	0.42	2.17	0.50	1.09	0.46	-0.48	0.60	-0.93	0.58	-1.21	0.42
b4536	JW5298	gene1869	yobH	23.33	2.73	0.38	0.47	2.22	0.22	1.33	0.30	0.97	0.42	-0.28	0.41	0.03	0.36	0.09	0.34	-0.49	0.39	-0.50	0.37	-0.13	0.26
b0191	JW0187	gene187	arfB	55.33	9.94	0.21	0.40	-0.53	0.18	-0.68	0.34	-0.89	0.37	-1.07	0.32	-0.78	0.36	-0.21	0.26	-0.51	0.30	-0.64	0.26	-0.43	0.26
b1827	JW1816	gene1870	kdgR	208.67	36.01	0.43	0.28	0.99	0.12	0.39	0.15	0.56	0.25	0.48	0.18	0.73	0.20	1.07	0.16	0.57	0.24	0.40	0.15	0.38	0.16
b1828	JW5299	gene1871	yebQ	16.00	5.03	1.06	0.55	1.17	0.27	-0.07	0.51	-0.16	0.70	-0.25	0.46	-0.16	0.47	-1.28	0.50	-0.80	0.50	0.35	0.39	0.29	0.30
b1829	JW1818	gene1872	htpX	952.00	157.07	-0.28	0.21	-0.67	0.09	-0.34	0.11	0.09	0.34	-0.42	0.14	-1.30	0.17	-0.30	0.12	0.01	0.15	0.45	0.11	0.34	0.12
b1830	JW1819	gene1873	prc	1208.33	176.73	-0.13	0.17	1.12	0.08	0.71	0.10	0.33	0.18	0.13	0.14	-0.15	0.21	-1.49	0.13	-0.87	0.18	-0.20	0.10	-0.36	0.14
b1831	JW5300	gene1874	proQ	587.00	102.30	0.76	0.20	2.88	0.08	1.89	0.10	1.35	0.34	1.02	0.18	0.40	0.22	-0.75	0.14	0.00	0.20	0.23	0.12	0.23	0.13
b1832	JW1821	gene1875	msrC	168.33	28.14	1.08	0.22	1.31	0.11	0.77	0.15	1.28	0.29	0.88	0.18	0.22	0.28	0.60	0.16	0.88	0.21	0.75	0.15	0.86	0.21
b1833	JW1822	gene1876	yebS	145.67	29.73	-0.27	0.32	-1.16	0.12	-1.75	0.25	-2.28	0.31	-2.56	0.26	-1.80	0.28	-1.26	0.21	-0.79	0.24	-0.49	0.18	-0.19	0.16
b1834	JW1823	gene1877	yebT	464.33	105.96	-0.51	0.24	-1.41	0.14	-1.21	0.16	-1.74	0.33	-1.68	0.19	-1.37	0.29	-0.61	0.16	-0.08	0.20	0.15	0.14	0.10	0.17
b1835	JW5301	gene1878	rsmF	119.33	24.26	0.60	0.34	1.47	0.12	1.42	0.16	0.64	0.41	-0.04	0.20	-0.65	0.37	-2.15	0.24	-1.52	0.32	-0.48	0.19	-0.56	0.18
b1836	JW5302	gene1879	yebV	3356.33	413.67	-0.71	0.30	-6.39	0.14	-6.98	0.21	-7.77	0.52	-8.38	0.29	-5.67	0.33	-4.05	0.17	-3.48	0.23	-2.02	0.13	-1.36	0.18
b0192	JW0188	gene188	nlpE	149.67	29.46	0.14	0.31	-0.70	0.18	-0.96	0.22	-0.80	0.29	-0.87	0.23	-0.61	0.26	0.48	0.18	0.01	0.25	-0.24	0.19	0.27	0.23
b1837	JW5303	gene1880	yebW	121.33	12.24	0.79	0.27	-2.39	0.16	-2.77	0.29	-2.89	0.36	-2.89	0.29	-1.48	0.29	-0.34	0.19	-0.66	0.26	-0.38	0.20	-0.65	0.17
b1838	JW1827	gene1881	pphA	37.00	6.35	1.14	0.36	-3.20	0.25	-3.84	0.63	-3.56	0.58	-4.19	0.63	-2.80	0.49	-1.66	0.36	-1.42	0.37	-1.06	0.33	0.00	0.27
b1839	JW1828	gene1884	yebY	44.67	7.54	0.36	0.43	2.03	0.16	2.32	0.20	2.21	0.26	1.67	0.23	1.07	0.27	0.49	0.25	0.95	0.25	1.05	0.22	0.68	0.20
b1840	JW1829	gene1885	yebZ	80.33	12.39	0.75	0.43	0.94	0.14	1.33	0.19	1.63	0.24	0.14	0.23	-0.27	0.46	-0.12	0.22	0.60	0.23	0.97	0.18	0.90	0.18
b1841	JW1830	gene1886	yobA	99.67	15.34	1.04	0.42	0.32	0.13	0.35	0.20	0.85	0.23	0.11	0.22	-0.05	0.30	0.67	0.19	0.78	0.23	0.73	0.17	0.34	0.16
b1842	JW1831	gene1887	holE	39.33	8.35	0.49	0.52	0.02	0.19	0.34	0.29	-0.09	0.34	-0.43	0.32	-0.64	0.35	-0.35	0.30	0.02	0.31	0.64	0.26	0.46	0.22
b1843	JW1832	gene1888	yobB	140.67	21.09	0.27	0.26	-2.01	0.12	-1.89	0.23	-1.66	0.31	-1.37	0.22	-0.27	0.22	0.63	0.18	0.63	0.19	0.99	0.15	0.84	0.20
b1844	JW1833	gene1889	exoX	109.67	15.32	0.48	0.33	-0.92	0.14	-0.21	0.20	-0.01	0.24	-0.13	0.20	-0.32	0.23	0.08	0.19	0.13	0.22	0.68	0.17	0.33	0.19
b0193	JW5016	gene189	yaeF	12.00	3.06	1.44	0.59	0.76	0.31	-0.40	0.57	-0.13	0.56	-0.53	0.56	0.53	0.49	0.35	0.45	-0.69	0.54	-0.45	0.48	-0.53	0.38
b1845	JW1834	gene1890	ptrB	760.00	113.54	-1.16	0.34	-3.67	0.12	-3.73	0.17	-3.53	0.23	-3.13	0.18	-2.44	0.32	-1.16	0.14	-0.68	0.20	-0.60	0.13	-0.25	0.14
b1846	JW1835	gene1891	yebE	195.67	28.50	-0.18	0.27	-2.41	0.16	-3.32	0.26	-2.85	0.30	-1.96	0.21	-1.59	0.25	-1.64	0.19	-1.11	0.23	-0.11	0.16	-0.05	0.15
b1847	JW1836	gene1892	yebF	419.67	66.76	-0.79	0.23	-1.96	0.09	-2.29	0.16	-2.44	0.28	-2.27	0.18	-1.35	0.37	-0.80	0.15	0.50	0.25	0.69	0.12	0.83	0.13
b1848	JW1837	gene1893	yebG	80.67	8.84	0.08	0.34	0.51	0.14	0.85	0.20	0.73	0.41	0.89	0.21	1.20	0.24	0.55	0.21	0.10	0.24	-0.22	0.21	-0.55	0.20
b1849	JW1838	gene1894	purT	4.33	1.76	1.82	0.68	2.58	0.44	3.34	0.52	2.48	0.83	1.63	0.63	2.62	0.62	0.10	0.73	0.73	0.65	1.14	0.56	0.79	0.41
b1850	JW1839	gene1895	eda	172.33	41.53	0.61	0.27	1.28	0.14	1.39	0.16	1.10	0.31	1.35	0.19	2.01	0.22	0.84	0.17	1.00	0.20	0.92	0.16	0.71	0.20
b1851	JW1840	gene1896	edd	72.67	15.68	0.56	0.37	2.22	0.14	1.70	0.21	1.68	0.26	1.39	0.23	1.63	0.24	0.54	0.21	0.62	0.24	0.84	0.20	0.73	0.21
b1852	JW1841	gene1897	zwf	484.67	103.13	-0.12	0.27	0.84	0.13	0.64	0.16	0.54	0.23	0.28	0.17	-0.45	0.21	-0.83	0.17	-0.71	0.20	-0.54	0.15	-0.26	0.17
b1853	JW1842	gene1898	yebK	130.00	26.51	0.48	0.30	-0.27	0.15	-0.73	0.22	1.46	0.65	1.68	0.19	1.34	0.29	0.45	0.19	0.05	0.23	0.32	0.18	0.08	0.21
b1854	JW1843	gene1899	pykA	2316.33	438.24	-1.08	0.19	-2.23	0.09	-1.71	0.11	-0.46	0.47	1.03	0.14	1.18	0.22	0.45	0.13	0.52	0.17	0.71	0.10	0.21	0.20
b0020	JW0019	gene19	nhaR	321.33	47.95	0.85	0.27	-1.20	0.10	-1.27	0.16	-1.65	0.31	-2.74	0.20	-2.50	0.27	-1.19	0.16	-1.05	0.19	-0.63	0.14	-0.33	0.16
b0194	JW0190	gene190	proS	1246.00	190.53	0.37	0.23	2.10	0.09	1.70	0.10	1.04	0.31	1.01	0.17	1.22	0.29	-1.16	0.13	-0.69	0.21	-0.04	0.11	-0.13	0.15
b1855	JW1844	gene1900	lpxM	246.33	42.53	0.57	0.22	0.74	0.09	0.23	0.15	-0.16	0.23	-0.13	0.17	-0.27	0.19	-0.28	0.16	0.26	0.20	0.22	0.14	0.58	0.17
b1856	JW5304	gene1901	mepM	446.67	69.27	-0.12	0.32	-0.62	0.12	-0.49	0.14	-0.16	0.21	-0.16	0.16	-0.85	0.20	-1.53	0.16	-1.00	0.22	-0.15	0.13	-0.39	0.17
b1857	JW5831	gene1902	znuA	118.00	18.50	1.18	0.37	1.39	0.13	2.01	0.16	1.87	0.24	1.56	0.19	0.80	0.25	-0.45	0.20	-0.58	0.24	0.30	0.18	0.01	0.20
b1858	JW1847	gene1903	znuC	49.67	8.17	1.39	0.33	1.15	0.16	1.55	0.22	1.02	0.38	0.72	0.26	0.90	0.27	0.22	0.25	-0.33	0.29	0.13	0.24	-0.24	0.30
b1859	JW1848	gene1904	znuB	22.33	4.91	1.19	0.52	1.53	0.21	1.77	0.30	1.02	0.42	0.83	0.33	0.44	0.37	-0.03	0.36	0.26	0.37	0.31	0.33	0.61	0.26
b1860	JW1849	gene1905	ruvB	284.67	51.24	-0.23	0.24	-0.75	0.12	-1.02	0.16	-0.97	0.24	-1.10	0.18	-0.92	0.20	-0.82	0.17	-0.50	0.19	-0.58	0.15	-0.37	0.17
b1861	JW1850	gene1906	ruvA	76.33	12.03	0.31	0.32	0.59	0.14	0.30	0.24	0.10	0.27	0.40	0.22	0.40	0.24	0.01	0.22	-0.06	0.24	-0.12	0.21	-0.32	0.19
b4677	Null	gene1907	yobI	2.00	1.15	-0.61	0.67	-3.10	1.15	-1.98	1.72	-2.02	1.64	-4.07	2.04	-3.15	1.60	-1.59	1.17	-0.97	0.97	-1.17	0.80	-0.67	0.51
b1862	JW5306	gene1908	yebB	2.00	1.00	-0.52	0.74	1.55	0.70	-0.08	1.20	-0.71	1.34	0.41	1.05	-0.05	1.11	1.76	0.75	1.39	0.75	0.74	0.71	0.59	0.48
b1863	JW1852	gene1909	ruvC	62.67	15.84	1.55	0.30	3.12	0.15	3.05	0.18	2.43	0.43	2.33	0.21	2.42	0.26	0.27	0.23	0.52	0.28	1.06	0.21	0.79	0.23
b0195	JW0191	gene191	tsaA	28.33	4.41	1.75	0.42	2.97	0.19	2.46	0.25	2.01	0.36	1.31	0.29	1.28	0.32	0.38	0.31	0.87	0.31	0.57	0.30	0.55	0.27
b1864	JW1853	gene1910	yebC	439.00	82.04	-0.24	0.32	1.82	0.09	1.70	0.11	1.17	0.32	1.04	0.16	1.29	0.23	-0.33	0.14	-0.19	0.18	0.38	0.13	0.26	0.16
b1865	JW1854	gene1911	nudB	134.67	15.59	0.50	0.26	2.03	0.11	1.42	0.15	0.78	0.40	0.75	0.20	0.88	0.24	-0.45	0.19	-0.35	0.22	0.25	0.17	0.67	0.16
b1866	JW1855	gene1912	aspS	1293.67	267.00	-0.01	0.21	0.97	0.13	0.95	0.12	0.32	0.36	0.40	0.17	0.53	0.28	-1.13	0.14	-0.63	0.22	-0.07	0.12	0.05	0.16
b1867	JW5307	gene1913	yecD	136.33	23.95	-0.46	0.46	-1.11	0.13	-0.95	0.22	-0.36	0.27	-0.02	0.20	0.06	0.30	-0.17	0.18	0.17	0.21	0.13	0.17	0.22	0.18
b1868	JW1857	gene1914	yecE	46.67	6.84	-0.06	0.40	0.23	0.19	-0.22	0.29	0.20	0.31	-0.13	0.28	-0.09	0.30	-0.75	0.29	-0.06	0.29	0.20	0.25	0.40	0.21
b1869	JW5308	gene1915	yecN	88.67	10.17	0.76	0.29	0.20	0.13	-0.38	0.22	-0.43	0.26	-0.61	0.24	-0.09	0.24	0.46	0.20	0.34	0.22	0.61	0.18	0.48	0.19
b1870	JW1859	gene1916	cmoA	87.00	15.04	0.92	0.34	2.06	0.13	1.38	0.18	0.98	0.38	0.35	0.21	0.10	0.32	-0.30	0.21	-0.14	0.24	0.33	0.19	0.43	0.18
b1871	JW1860	gene1917	cmoB	134.33	21.94	-0.15	0.31	1.70	0.12	0.84	0.16	0.26	0.43	0.13	0.19	-0.08	0.28	-1.05	0.20	-0.46	0.21	-0.20	0.17	-0.04	0.17
b1872	JW1861	gene1918	torZ	43.67	11.14	0.46	0.43	-1.25	0.25	-1.94	0.43	-1.34	0.43	-1.09	0.35	-0.98	0.38	0.60	0.27	-0.12	0.33	-0.34	0.30	-0.31	0.26
b1873	JW1862	gene1919	torY	14.67	2.91	-0.87	0.65	-2.88	0.39	-4.97	1.29	-4.17	1.02	-2.13	0.62	-2.79	0.71	-1.41	0.52	-1.45	0.54	-1.21	0.50	-0.62	0.31
b0196	JW0192	gene192	rcsF	31.33	4.33	2.69	0.30	2.86	0.18	1.75	0.25	1.91	0.32	1.79	0.27	1.82	0.27	1.58	0.25	1.71	0.27	1.07	0.26	1.17	0.22
b1874	JW1863	gene1920	cutC	507.33	29.42	-1.73	0.28	-2.72	0.14	-2.31	0.18	-2.47	0.31	-2.44	0.20	-2.59	0.24	-1.53	0.23	-1.63	0.21	-0.48	0.16	-0.50	0.22
b1875	JW5309	gene1921	yecM	112.67	14.38	-0.29	0.34	-0.18	0.13	-0.38	0.21	-0.25	0.25	-0.51	0.22	-0.92	0.26	-1.29	0.22	-1.09	0.25	-0.33	0.19	-0.24	0.17
b1876	JW1865	gene1922	argS	916.67	147.01	-0.53	0.21	0.84	0.07	1.17	0.10	0.47	0.41	0.09	0.14	-0.18	0.35	-2.04	0.14	-1.45	0.18	-0.69	0.11	-0.56	0.13
b1877	JW5310	gene1923	yecT	0.67	0.33	0.53	0.74	5.87	0.91	3.95	1.07	2.61	1.13	2.06	1.29	0.96	1.33	-0.04	1.22	0.33	0.99	-0.44	0.74	-0.46	0.43
b1878	JW1867	gene1924	flhE	0.67	0.33	0.64	0.79	0.80	1.11	1.55	1.45	1.10	1.51	1.81	1.32	1.15	1.31	0.12	1.21	-0.51	0.97	0.63	0.80	0.21	0.50
b1879	JW1868	gene1925	flhA	28.67	3.84	1.14	0.40	-2.11	0.26	-1.18	0.42	-0.98	0.45	-0.31	0.36	-0.59	0.38	0.05	0.32	0.04	0.34	0.09	0.31	0.32	0.24
b1880	JW1869	gene1926	flhB	3.67	1.76	0.70	0.79	-0.16	0.63	0.73	0.82	1.22	0.79	0.73	0.78	0.26	0.88	0.16	0.74	-0.53	0.81	0.13	0.66	0.20	0.46
b1881	JW1870	gene1927	cheZ	21.33	2.33	-0.39	0.54	-1.43	0.31	-1.70	0.53	-2.08	0.58	-1.66	0.50	-1.48	0.48	-0.17	0.36	-0.32	0.39	-0.05	0.36	-0.13	0.27
b1882	JW1871	gene1928	cheY	6.00	1.53	-0.25	0.79	-1.07	0.52	-1.69	0.96	-0.81	0.75	-0.73	0.75	0.08	0.66	0.26	0.62	-0.37	0.65	-0.48	0.62	0.47	0.38
b1883	JW1872	gene1929	cheB	1.33	0.33	0.47	0.80	0.46	0.88	0.01	1.43	-0.03	1.22	1.65	1.00	0.19	1.12	0.33	1.05	-0.15	0.94	0.17	0.79	0.43	0.50
b0197	JW0193	gene193	metQ	224.00	39.74	-0.61	0.30	1.26	0.13	1.46	0.15	1.07	0.27	0.73	0.19	0.60	0.22	1.58	0.16	1.19	0.20	0.29	0.15	-0.15	0.19
b1884	JW1873	gene1930	cheR	4.00	1.15	0.05	0.79	-1.35	0.60	-1.48	1.12	-0.78	1.07	-1.09	0.96	-0.85	0.89	0.08	0.72	-0.39	0.77	0.31	0.64	0.05	0.44
b1885	JW1874	gene1931	tap	9.33	4.37	0.15	0.72	-2.04	0.47	-2.20	0.91	-1.84	0.82	-1.41	0.75	-1.26	0.76	-0.73	0.62	-0.49	0.60	-0.20	0.53	-0.37	0.39
b1886	JW1875	gene1932	tar	3.00	0.58	0.19	0.81	-0.40	0.62	-1.43	1.26	0.48	0.84	0.74	0.81	0.97	0.74	0.92	0.71	-0.12	0.79	0.29	0.69	0.03	0.47
b1887	JW1876	gene1933	cheW	6.67	0.88	0.19	0.71	-0.83	0.47	-0.36	0.72	-0.96	0.79	-1.16	0.77	-0.09	0.62	-0.11	0.60	-0.14	0.61	0.08	0.55	0.23	0.38
b1888	JW1877	gene1934	cheA	14.33	5.93	0.21	0.67	-0.58	0.38	-1.91	0.73	-0.58	0.63	-0.13	0.52	-0.72	0.60	-1.12	0.55	-0.70	0.55	-0.59	0.50	-0.35	0.35
b1889	JW1878	gene1935	motB	4.00	1.53	-0.01	0.79	-0.39	0.56	-1.98	1.20	-1.09	0.98	-0.56	0.90	-1.57	1.04	-1.26	0.92	-1.90	0.91	0.18	0.64	-0.02	0.46
b1890	JW1879	gene1936	motA	3.33	1.45	0.39	0.81	0.56	0.61	-0.61	1.07	-0.50	1.11	-0.57	1.00	-1.23	1.06	-0.07	0.80	-0.52	0.83	0.26	0.67	0.39	0.45
b1891	JW1880	gene1937	flhC	13.67	3.67	0.70	0.57	1.27	0.28	1.16	0.41	1.63	0.40	1.72	0.37	1.60	0.46	0.31	0.42	0.01	0.47	0.97	0.38	0.54	0.32
b1892	JW1881	gene1938	flhD	11.33	1.86	1.53	0.50	1.64	0.29	1.42	0.42	1.79	0.45	1.57	0.40	1.33	0.50	1.11	0.42	0.52	0.44	0.83	0.40	0.59	0.34
b1895	JW1884	gene1939	uspC	29.67	3.53	0.39	0.45	-2.12	0.25	-2.92	0.56	0.34	0.58	1.05	0.30	2.16	0.28	2.59	0.23	1.81	0.29	1.56	0.25	0.77	0.27
b0198	JW0194	gene194	metI	35.33	8.37	0.61	0.41	2.25	0.19	2.58	0.22	1.70	0.37	0.94	0.28	1.28	0.28	1.26	0.26	0.74	0.32	0.24	0.28	-0.17	0.24
b1896	JW5312	gene1940	otsA	5490.33	808.14	-2.21	0.29	-7.71	0.12	-7.33	0.19	-7.18	0.27	-5.74	0.19	-3.75	0.50	-1.30	0.12	-0.58	0.18	-0.48	0.11	-0.30	0.14
b1897	JW1886	gene1941	otsB	2402.00	352.52	-1.40	0.34	-9.08	0.19	-8.39	0.34	-8.35	0.42	-6.44	0.22	-4.27	0.49	-1.96	0.14	-1.52	0.18	-1.07	0.12	-0.52	0.18
b4460	JW1887	gene1942	araH	95.00	13.05	0.08	0.39	-4.25	0.20	-4.47	0.47	-3.44	0.41	-2.96	0.32	-1.80	0.29	-0.31	0.22	-0.49	0.24	-0.62	0.21	-0.41	0.19
b1900	JW1888	gene1943	araG	124.67	23.33	-0.66	0.37	-4.91	0.20	-4.96	0.47	-3.71	0.48	-2.69	0.29	-1.74	0.26	-0.30	0.20	-0.74	0.25	-0.46	0.18	-0.69	0.17
b1901	JW1889	gene1944	araF	154.33	25.43	0.10	0.31	-5.23	0.20	-7.00	0.79	-4.33	0.60	-2.74	0.26	-0.99	0.23	0.48	0.18	0.04	0.20	-0.11	0.17	-0.10	0.18
b1902	JW1890	gene1945	ftnB	36.00	4.73	0.71	0.39	-0.21	0.21	0.72	0.28	1.87	0.49	2.59	0.23	3.01	0.26	3.46	0.23	2.65	0.24	2.07	0.21	1.03	0.30
b4537	JW1891	gene1946	yecJ	14.33	3.53	1.32	0.60	4.31	0.25	4.00	0.28	3.39	0.49	2.30	0.34	1.91	0.41	-0.78	0.49	-0.24	0.51	0.54	0.40	0.23	0.31
b4663	Null	gene1947	azuC	1.00	0.58	0.06	0.70	5.77	0.78	2.69	1.06	1.65	1.26	-3.18	2.15	-2.37	1.65	-0.11	1.17	-0.40	0.99	-0.59	0.76	-0.22	0.48
b1904	JW1892	gene1948	yecR	0.00	0.00	0.87	0.66	5.17	1.93	4.77	2.14	4.99	1.79	4.69	1.92	2.66	1.64	2.12	1.26	NA	NA	NA	NA	0.57	0.43
b1905	JW1893	gene1949	ftnA	56.00	14.64	-0.37	0.53	2.31	0.21	1.71	0.23	2.76	0.41	5.53	0.21	5.88	0.28	5.42	0.21	5.21	0.23	4.72	0.17	2.01	0.48
b0199	JW0195	gene195	metN	26.00	4.51	0.77	0.42	3.62	0.20	4.19	0.21	3.09	0.53	2.49	0.27	2.80	0.34	2.86	0.25	2.24	0.30	1.02	0.28	0.04	0.25
b1906	JW1894	gene1950	yecH	38.67	6.69	-0.70	0.56	-3.58	0.26	-5.55	0.97	-4.70	0.77	0.17	0.32	0.42	0.42	0.77	0.26	0.48	0.29	0.59	0.26	1.30	0.24
b1907	JW1895	gene1951	tyrP	86.00	14.22	-0.59	0.35	1.22	0.12	1.31	0.18	0.90	0.44	0.44	0.21	-0.03	0.37	-1.35	0.24	-1.31	0.29	-0.70	0.23	-0.53	0.18
b1908	JW1896	gene1952	yecA	201.00	33.47	0.36	0.36	-0.05	0.12	-1.26	0.18	-1.32	0.24	-1.17	0.19	-0.60	0.23	0.22	0.17	0.10	0.20	0.22	0.15	0.29	0.20
b1912	JW1897	gene1956	pgsA	210.00	38.40	0.16	0.24	-0.85	0.10	-1.00	0.17	-0.50	0.28	-0.01	0.17	0.71	0.22	-0.36	0.17	-0.45	0.19	-0.05	0.15	-0.35	0.18
b1913	JW1898	gene1957	uvrC	469.67	83.83	-0.49	0.23	-0.33	0.11	-0.53	0.14	-0.41	0.21	-0.46	0.16	-0.44	0.19	-0.72	0.15	-0.31	0.18	-0.14	0.13	-0.31	0.15
b1914	JW1899	gene1958	uvrY	127.67	21.83	0.32	0.37	1.14	0.11	1.19	0.17	1.30	0.23	1.24	0.18	1.36	0.24	0.77	0.17	0.69	0.20	0.30	0.17	0.27	0.18
b1915	JW1900	gene1959	yecF	7.00	0.58	-0.53	0.78	4.44	0.33	4.58	0.36	3.53	0.63	3.05	0.43	3.07	0.48	0.39	0.54	0.90	0.55	0.54	0.50	0.36	0.39
b0200	JW0196	gene196	gmhB	91.33	13.42	0.52	0.33	0.99	0.14	0.03	0.22	0.30	0.27	-0.06	0.23	0.12	0.25	0.12	0.22	-0.39	0.25	-0.38	0.21	-0.44	0.21
b1916	JW1901	gene1960	sdiA	33.67	4.84	1.21	0.38	1.86	0.19	1.93	0.24	2.31	0.32	1.99	0.25	1.11	0.29	0.68	0.28	0.47	0.32	0.20	0.28	0.18	0.29
b1917	JW1902	gene1961	yecC	74.67	16.29	0.11	0.36	-1.03	0.16	-1.41	0.29	-1.70	0.42	-1.40	0.31	-0.99	0.30	-0.46	0.23	0.61	0.28	0.33	0.21	0.56	0.21
b1918	JW1903	gene1962	yecS	61.33	10.73	0.84	0.33	-1.08	0.19	-1.97	0.35	-1.96	0.39	-1.58	0.31	-1.52	0.35	-0.38	0.25	0.27	0.29	0.13	0.23	0.47	0.20
b1919	JW5313	gene1963	dcyD	302.00	37.80	-0.43	0.33	-1.89	0.11	-2.14	0.19	-2.06	0.30	-1.95	0.19	-1.79	0.28	-0.18	0.15	0.39	0.18	-0.09	0.14	0.09	0.15
b1920	JW1905	gene1964	fliY	717.00	141.59	-1.97	0.35	-3.69	0.13	-3.67	0.18	-3.16	0.25	-2.51	0.18	-0.95	0.29	0.59	0.15	1.06	0.29	-0.46	0.14	-0.17	0.20
b1921	JW1906	gene1965	fliZ	10.67	0.88	0.06	0.63	-0.93	0.36	-0.42	0.62	0.27	0.51	0.71	0.48	0.78	0.48	0.03	0.48	0.72	0.45	0.09	0.46	0.41	0.33
b1922	JW1907	gene1966	fliA	0.67	0.33	-0.21	0.51	2.65	1.01	3.81	1.10	4.47	1.00	5.57	0.96	4.43	0.94	1.80	1.03	1.30	0.93	1.07	0.79	0.73	0.51
b1923	JW1908	gene1967	fliC	294.33	49.02	-0.87	0.25	-2.53	0.12	-2.47	0.19	-2.46	0.26	-2.28	0.20	-1.43	0.24	-0.45	0.15	-0.86	0.19	-0.72	0.15	-0.55	0.18
b1924	JW1909	gene1968	fliD	2.33	0.88	1.53	0.78	1.31	0.63	0.74	0.99	0.88	0.87	1.77	0.81	2.02	0.74	0.96	0.79	1.15	0.73	0.80	0.69	0.98	0.46
b1925	JW1910	gene1969	fliS	1.33	0.33	-0.61	0.69	0.28	0.86	0.43	1.34	0.24	1.25	2.01	1.04	-1.59	1.43	0.55	1.00	0.50	0.90	0.31	0.78	0.19	0.51
b1926	JW1911	gene1970	fliT	0.67	0.33	1.31	0.80	1.28	1.10	1.62	1.46	1.64	1.28	0.65	1.59	1.32	1.25	0.62	1.19	0.22	0.99	-0.05	0.77	0.50	0.51
b1927	JW1912	gene1971	amyA	1746.00	297.21	-0.56	0.34	-5.65	0.12	-6.83	0.25	-6.36	0.30	-4.93	0.19	-2.84	0.30	-1.21	0.13	-0.44	0.18	-0.51	0.12	-0.11	0.15
b1928	JW1913	gene1972	yedD	101.00	21.50	0.36	0.39	0.21	0.15	0.64	0.20	0.48	0.31	0.96	0.23	1.10	0.24	0.03	0.22	0.59	0.22	0.64	0.19	0.44	0.23
b1929	JW1914	gene1973	yedE	86.00	11.36	0.01	0.55	-0.19	0.13	0.03	0.21	0.69	0.37	4.38	0.18	4.12	0.37	-0.01	0.22	0.85	0.37	1.64	0.17	1.13	0.24
b1930	JW1915	gene1974	yedF	19.33	1.86	-1.09	0.65	-0.77	0.28	-0.34	0.43	0.52	0.47	3.94	0.26	4.05	0.45	0.56	0.35	0.68	0.37	1.26	0.32	0.78	0.31
b1931	JW1916	gene1975	yedK	57.67	12.00	-0.20	0.43	-3.11	0.22	-3.72	0.50	-3.68	0.53	-2.61	0.38	-1.37	0.34	0.17	0.24	0.15	0.26	0.11	0.23	0.24	0.20
b1932	JW1917	gene1976	yedL	6.33	0.67	1.11	0.64	0.15	0.41	-0.41	0.74	-0.81	0.73	-0.08	0.66	1.03	0.54	1.44	0.49	0.86	0.55	1.05	0.49	1.09	0.36
-	-	gene1977	yedN	0.00	0.00	NA	NA	4.93	1.95	2.00	2.50	3.63	1.94	3.22	2.09	1.07	1.55	0.65	1.05	NA	NA	0.28	0.48	0.32	0.35
-	-	gene1978	intG	2.00	0.58	0.78	0.80	0.63	0.69	-0.65	1.32	-0.30	1.10	-1.76	1.39	-1.45	1.24	-2.07	1.16	-1.51	0.98	-1.33	0.80	-1.06	0.51
b1937	JW1921	gene1979	fliE	2.00	1.00	-0.60	0.67	-0.65	0.81	0.28	1.23	2.39	0.79	1.98	0.83	0.35	1.02	0.34	0.95	0.66	0.83	0.14	0.76	0.21	0.50
b1938	JW1922	gene1980	fliF	4.67	1.20	-0.01	0.78	0.59	0.50	1.84	0.60	2.76	0.63	3.04	0.50	2.11	0.56	-0.76	0.76	-0.35	0.71	-1.52	0.73	-0.29	0.44
b1939	JW1923	gene1981	fliG	6.33	2.03	1.45	0.63	-0.22	0.46	0.43	0.68	1.48	0.64	2.19	0.49	1.03	0.59	-0.04	0.61	-0.89	0.74	-0.23	0.59	-0.44	0.43
b1940	JW1924	gene1982	fliH	5.00	1.53	-0.19	0.80	-1.02	0.55	-0.21	0.82	0.90	0.71	1.49	0.60	1.56	0.59	-0.42	0.72	0.02	0.67	0.12	0.62	0.17	0.41
b1941	JW1925	gene1983	fliI	0.67	0.67	1.13	0.79	2.06	1.07	2.74	1.30	3.01	1.14	4.94	0.98	3.13	1.08	0.29	1.25	1.43	0.94	1.46	0.78	1.10	0.51
b1942	JW1926	gene1984	fliJ	2.33	0.33	-0.98	0.76	-1.84	0.78	-0.77	1.21	0.79	0.87	1.31	0.82	0.83	0.82	-1.36	1.04	-0.99	0.92	-0.70	0.78	-0.56	0.51
b1943	JW1927	gene1985	fliK	8.67	3.18	-0.17	0.72	-2.12	0.49	-0.31	0.66	1.01	0.58	1.61	0.48	0.17	0.60	-0.41	0.58	-0.70	0.64	-0.19	0.53	-0.34	0.39
b1944	JW1928	gene1986	fliL	2.33	0.88	0.80	0.80	1.29	0.72	2.18	0.79	2.68	0.74	3.01	0.68	2.48	0.78	-0.37	0.95	-0.69	0.95	0.09	0.74	0.14	0.49
b1945	JW1929	gene1987	fliM	5.33	2.33	1.07	0.74	0.83	0.55	2.21	0.56	2.73	0.65	2.94	0.48	1.93	0.58	-0.66	0.75	-0.80	0.76	0.56	0.57	0.01	0.43
b1946	JW1930	gene1988	fliN	0.33	0.33	-0.15	0.50	1.86	1.36	1.94	1.69	2.58	1.44	3.83	1.31	2.81	1.23	0.13	1.26	0.13	0.94	0.36	0.76	0.45	0.49
b1947	JW5316	gene1989	fliO	0.00	0.00	0.42	0.52	3.86	2.03	4.85	2.13	4.99	1.79	4.59	1.94	2.32	1.65	0.48	1.01	NA	NA	1.28	0.77	0.78	0.46
b1948	JW1932	gene1990	fliP	1.67	0.33	1.30	0.79	0.36	0.77	1.02	1.07	1.16	0.94	1.35	0.97	-1.18	1.26	-1.95	1.20	-0.63	0.94	0.48	0.75	0.03	0.51
b1949	JW1933	gene1991	fliQ	0.00	0.00	NA	NA	3.18	2.10	3.16	2.36	2.36	2.09	3.22	2.09	1.70	1.64	0.75	1.08	0.41	0.69	NA	NA	0.30	0.34
b1950	JW1934	gene1992	fliR	0.33	0.33	0.49	0.65	1.53	1.40	1.04	2.06	1.90	1.57	2.13	1.59	0.97	1.60	0.23	1.26	-0.01	0.90	1.12	0.80	0.38	0.47
b1951	JW1935	gene1993	rcsA	9.00	0.58	-0.86	0.79	0.37	0.42	-0.90	0.70	0.00	0.59	-0.21	0.58	-0.48	0.59	-0.30	0.54	0.18	0.52	-0.42	0.52	-0.25	0.38
b1952	JW1936	gene1994	dsrB	40.67	3.48	0.05	0.44	-0.49	0.20	-1.89	0.41	-2.01	0.44	-2.08	0.47	-1.38	0.38	-1.53	0.35	-0.88	0.38	-0.86	0.31	0.49	0.37
b1953	JW5317	gene1995	yodD	2395.33	402.31	-1.63	0.40	-9.32	0.19	-9.20	0.44	-9.10	0.48	-7.95	0.29	-4.98	0.55	-1.95	0.14	-1.61	0.17	-1.06	0.13	-0.80	0.17
b1955	JW1938	gene1997	yedP	1830.33	330.75	-0.69	0.33	-7.64	0.16	-7.56	0.31	-7.87	0.43	-6.77	0.25	-4.37	0.47	-1.63	0.14	-0.93	0.20	-0.82	0.12	-0.47	0.17
b1956	JW5832	gene1998	yedQ	363.67	46.99	0.00	0.23	-2.61	0.10	-3.07	0.19	-3.13	0.25	-2.83	0.22	-2.13	0.22	-1.06	0.15	-0.82	0.17	-0.28	0.13	-0.02	0.17
b1957	JW1940	gene1999	yodC	112.33	26.30	1.15	0.48	-2.70	0.19	-5.86	0.66	-5.08	0.59	-4.55	0.43	-3.58	0.40	-1.13	0.23	-0.77	0.29	-0.84	0.22	1.31	0.40
b0003	JW0002	gene2	thrB	337.33	57.77	0.30	0.34	-0.71	0.13	-0.61	0.14	-0.42	0.22	-0.66	0.19	-1.56	0.35	2.02	0.13	0.50	0.35	-1.13	0.14	-0.41	0.19
b0021	Null	gene20	insB1	1.00	0.58	0.65	0.77	1.96	0.90	0.72	1.47	-0.67	1.69	-1.64	1.79	-2.52	1.64	-0.55	1.19	-0.17	0.98	-0.16	0.80	-0.11	0.50
b1958	JW1941	gene2000	yedI	138.33	31.44	0.35	0.36	-1.41	0.18	-3.25	0.32	-2.87	0.36	-2.32	0.27	-2.05	0.30	-0.90	0.21	-0.39	0.23	-0.38	0.19	0.40	0.24
b1959	JW1942	gene2001	yedA	5.00	1.53	2.94	0.62	1.05	0.44	-1.20	0.97	0.18	0.88	-0.38	0.79	-0.12	0.77	0.91	0.60	1.37	0.55	1.00	0.54	0.38	0.41
b1960	JW1943	gene2002	vsr	10.00	2.89	1.44	0.55	1.51	0.31	1.19	0.49	1.13	0.59	0.88	0.47	0.89	0.47	-0.26	0.55	0.21	0.51	0.67	0.45	0.27	0.35
b1961	JW1944	gene2003	dcm	359.67	54.97	-0.66	0.25	-0.75	0.09	-0.37	0.14	-0.55	0.23	-0.86	0.17	-0.73	0.23	-1.61	0.16	-1.19	0.19	-0.42	0.13	-0.71	0.17
b1962	JW1945	gene2004	yedJ	52.00	7.21	0.87	0.34	1.11	0.16	0.16	0.26	-0.58	0.54	-0.71	0.29	-0.89	0.31	-0.93	0.28	-0.23	0.28	0.17	0.24	0.47	0.20
b1963	JW1946	gene2005	yedR	18.00	2.00	0.70	0.52	1.49	0.24	0.71	0.38	-0.39	0.93	-3.20	0.69	-2.16	0.59	-1.11	0.45	-0.87	0.45	-0.34	0.39	0.46	0.32
-	-	gene2007	yedS	107.00	8.50	-0.23	0.40	-3.24	0.18	-3.32	0.35	-3.16	0.40	-2.92	0.31	-2.33	0.46	0.42	0.19	-0.18	0.25	-0.56	0.21	-0.16	0.18
b1967	JW1950	gene2008	hchA	12405.00	2072.43	-1.84	0.38	-8.11	0.16	-7.23	0.15	-6.12	0.44	-4.98	0.20	-4.03	0.36	-1.31	0.13	-0.19	0.22	-0.26	0.11	-0.27	0.14
b1968	JW1951	gene2009	yedV	14.33	4.06	-0.23	0.62	2.77	0.27	1.63	0.38	1.97	0.38	1.75	0.41	1.83	0.39	0.61	0.41	0.93	0.39	0.74	0.38	0.31	0.31
b1969	JW5322	gene2010	yedW	10.33	2.91	2.15	0.51	2.60	0.29	1.23	0.46	1.87	0.45	1.51	0.44	1.20	0.45	1.62	0.40	1.00	0.45	0.37	0.47	0.37	0.33
b1970	JW1953	gene2011	hiuH	8.33	0.67	-1.61	0.79	-0.91	0.39	-0.08	0.64	0.65	0.53	0.78	0.51	1.37	0.46	1.70	0.42	1.85	0.42	0.95	0.44	0.79	0.34
b1971	JW1954	gene2012	yedY	190.00	33.98	0.41	0.33	-3.28	0.15	-3.09	0.26	-3.66	0.35	-3.03	0.25	-1.46	0.25	0.37	0.16	0.24	0.19	-0.03	0.16	-0.03	0.18
b1972	JW1955	gene2013	yedZ	49.00	9.61	-0.13	0.40	-2.29	0.20	-1.93	0.39	-2.74	0.50	-2.55	0.42	-1.44	0.47	-0.20	0.26	-0.08	0.29	-0.28	0.26	0.20	0.23
b1973	JW1956	gene2014	zinT	5.33	0.88	0.69	0.70	1.52	0.46	2.30	0.52	2.33	0.52	2.31	0.50	1.84	0.52	0.87	0.57	0.74	0.58	0.96	0.52	0.53	0.43
b1974	JW5323	gene2015	yodB	30.00	6.51	-1.17	0.56	-2.43	0.29	-1.79	0.46	-1.61	0.46	-1.80	0.44	-1.67	0.48	-1.10	0.37	-1.04	0.40	-0.50	0.34	-0.28	0.26
b1976	JW1958	gene2017	mtfA	382.00	59.23	0.20	0.26	-3.35	0.16	-3.02	0.20	-0.63	0.64	0.19	0.19	1.02	0.20	1.23	0.15	0.57	0.19	0.63	0.14	0.13	0.23
b1978	JW5833	gene2019	yeeJ	202.00	29.60	-0.29	0.26	-0.95	0.11	-1.55	0.19	-1.56	0.24	-1.38	0.21	-0.99	0.20	-0.49	0.16	-0.56	0.19	-0.25	0.16	-0.36	0.15
-	-	gene2020	yeeL	1.67	0.33	0.15	0.79	1.08	0.73	-0.01	1.26	0.60	1.03	0.31	1.11	0.90	1.05	1.66	0.80	0.82	0.82	-0.35	0.79	-0.24	0.51
b1981	JW1962	gene2021	shiA	81.67	15.92	0.95	0.30	0.13	0.14	-0.05	0.24	0.09	0.31	-0.54	0.25	-0.78	0.28	0.20	0.21	0.12	0.23	-0.18	0.21	-0.03	0.18
b1982	JW1963	gene2022	amn	668.67	95.80	-0.76	0.26	-2.18	0.12	-1.38	0.13	-0.51	0.37	-0.75	0.16	-0.74	0.29	0.98	0.15	0.78	0.16	0.28	0.12	-0.06	0.16
b1983	JW1964	gene2023	yeeN	30.33	7.75	0.93	0.44	5.25	0.21	4.38	0.20	4.25	0.38	4.39	0.23	4.49	0.34	2.42	0.27	1.86	0.29	1.07	0.27	0.76	0.25
b1985	JW1965	gene2025	yeeO	52.00	11.06	0.89	0.35	-2.01	0.20	-2.77	0.43	-1.85	0.42	-2.39	0.38	-1.49	0.36	-0.71	0.28	-0.27	0.29	-0.28	0.26	0.19	0.23
b1987	JW1966	gene2027	cbl	128.33	23.92	-2.60	0.42	-3.45	0.16	-3.78	0.35	-3.62	0.42	-4.00	0.35	-2.18	0.41	-2.71	0.26	-0.41	0.84	-2.25	0.24	-1.92	0.24
b1988	JW1967	gene2028	nac	10.00	0.58	1.11	0.54	0.50	0.37	-1.64	0.78	-1.73	0.72	-1.75	0.71	-0.97	0.60	0.96	0.43	0.66	0.45	0.22	0.46	0.58	0.34
b0207	JW0197	gene203	dkgB	130.33	28.81	-0.80	0.35	-0.02	0.17	-1.11	0.24	-0.89	0.36	-1.32	0.26	-1.45	0.38	-1.98	0.27	-2.02	0.29	-1.94	0.24	-1.51	0.22
b1990	JW1968	gene2030	ldtA	523.00	71.58	-0.62	0.31	-4.68	0.14	-4.51	0.23	-3.85	0.39	-3.11	0.19	-1.60	0.45	0.62	0.13	0.46	0.16	0.32	0.12	0.51	0.16
b1991	JW1969	gene2031	cobT	28.67	8.57	-0.16	0.51	0.25	0.24	-0.43	0.40	-0.29	0.42	0.46	0.33	0.41	0.35	0.76	0.30	0.54	0.33	-0.11	0.32	0.59	0.29
b1992	JW1970	gene2032	cobS	7.00	4.51	1.47	0.66	0.51	0.45	-1.07	0.91	-0.32	0.85	0.31	0.71	-0.02	0.73	0.52	0.59	0.68	0.60	0.23	0.59	1.09	0.41
b1993	JW1971	gene2033	cobU	17.33	4.63	0.29	0.60	-0.41	0.31	-0.91	0.53	-0.14	0.49	-0.28	0.45	0.10	0.44	0.69	0.37	-0.13	0.45	-0.34	0.42	0.07	0.32
-	-	gene2034	yeeH	0.33	0.33	0.42	0.62	3.09	1.30	0.19	2.33	1.11	1.95	0.63	1.97	0.73	1.58	1.01	1.24	0.41	0.94	-0.01	0.63	0.05	0.42
b0259	Null	gene2035	insH1	10.00	2.52	0.88	0.63	0.31	0.34	0.67	0.52	0.75	0.50	0.83	0.49	1.74	0.42	1.03	0.44	0.24	0.50	0.36	0.46	-0.36	0.37
-	-	gene2036	yoeG	0.00	0.00	2.93	0.81	8.56	1.65	7.11	1.90	6.52	1.64	5.29	1.86	4.93	1.42	3.66	1.17	2.54	0.98	2.19	0.80	1.59	0.51
-	-	gene2037	yoeH	4.33	2.33	1.07	0.80	3.95	0.44	2.69	0.57	3.12	0.56	1.25	0.69	1.90	0.60	2.41	0.53	1.63	0.60	1.48	0.54	1.21	0.41
-	-	gene2038	yoeA	25.00	7.57	-0.45	0.66	-1.62	0.31	-1.35	0.49	-1.68	0.60	-2.25	0.54	-1.58	0.54	0.69	0.33	0.48	0.42	-0.08	0.36	0.34	0.30
b0361	Null	gene2039	insD1	3.00	0.58	0.75	0.76	0.51	0.60	0.03	0.98	0.07	0.89	0.18	0.93	-0.29	0.89	0.66	0.77	0.94	0.70	-0.03	0.70	0.88	0.44
b0208	JW0198	gene204	yafC	122.33	24.67	-0.15	0.37	-1.63	0.16	-0.97	0.23	-0.17	0.33	-0.10	0.22	-0.01	0.27	0.92	0.20	0.59	0.28	-0.11	0.19	-0.11	0.20
b0360	Null	gene2040	insC1	1.00	0.00	-0.48	0.65	-2.30	1.42	-3.30	2.31	-3.10	2.01	-3.36	2.12	-2.57	1.64	-0.91	1.23	-0.41	0.99	-0.65	0.78	-0.40	0.49
-	-	gene2041	yeeP	19.33	3.18	1.14	0.53	-1.59	0.30	-1.90	0.58	-1.22	0.56	-1.18	0.48	-1.11	0.48	0.59	0.36	0.49	0.37	0.26	0.36	0.36	0.28
b2000	JW1982	gene2043	flu	384.00	102.24	-1.87	0.34	-2.67	0.23	1.47	0.18	0.96	0.63	0.36	0.22	2.88	0.57	1.19	0.19	1.23	0.24	0.98	0.37	0.07	0.23
b2001	JW1983	gene2044	yeeR	21.00	4.73	0.07	0.62	-0.38	0.25	1.84	0.30	1.39	0.63	0.44	0.36	2.43	0.55	0.40	0.35	0.10	0.38	0.45	0.36	-0.17	0.28
b2002	JW1984	gene2045	yeeS	2.67	0.88	-0.04	0.81	-0.79	0.74	0.32	0.98	0.68	0.98	-1.01	1.15	1.43	0.78	0.21	0.82	0.11	0.79	-0.05	0.72	-0.31	0.49
b2003	JW1985	gene2046	yeeT	0.00	0.00	NA	NA	1.97	2.23	1.60	2.51	NA	NA	1.39	2.22	1.05	1.55	NA	NA	NA	NA	0.51	0.59	0.11	0.22
b2004	JW1986	gene2047	cbeA	0.00	0.00	0.70	0.62	2.12	2.15	NA	NA	NA	NA	NA	NA	0.97	1.53	0.48	1.01	NA	NA	0.28	0.48	0.15	0.26
b2005	JW1987	gene2048	cbtA	0.67	0.67	0.02	0.55	-1.32	1.59	-2.28	2.48	-1.85	2.09	-0.80	2.04	-0.46	1.63	-0.18	1.26	-0.73	0.81	-0.25	0.70	-0.26	0.44
-	-	gene2049	yeeW	10.33	2.85	1.66	0.52	-1.60	0.39	-1.13	0.73	-0.77	0.60	-0.95	0.64	-0.78	0.63	-0.24	0.53	-0.26	0.55	0.23	0.47	-0.40	0.37
b0209	JW5017	gene205	yafD	909.67	143.18	-0.15	0.22	-3.24	0.09	-3.02	0.14	-1.77	0.45	-2.29	0.17	-2.01	0.25	-0.58	0.13	-0.74	0.17	-0.57	0.12	-0.59	0.14
-	-	gene2050	yoeD	0.33	0.33	-0.12	0.49	2.03	1.38	0.21	2.25	1.17	1.76	-0.25	2.13	-1.10	1.54	0.23	1.26	-0.49	0.71	-0.08	0.64	-0.01	0.42
-	-	gene2051	yoeF	5.33	2.40	0.78	0.76	-0.07	0.48	-0.83	0.91	-1.82	1.00	-1.54	0.95	-0.84	0.91	0.51	0.63	-0.10	0.68	-0.09	0.62	0.03	0.42
b2007	JW1989	gene2052	yeeX	247.33	46.56	0.34	0.32	1.60	0.14	1.83	0.13	2.10	0.23	2.42	0.17	2.66	0.22	1.73	0.15	1.38	0.20	1.37	0.15	1.10	0.17
b2008	JW1990	gene2053	yeeA	412.33	58.67	-0.71	0.25	-1.77	0.11	-2.19	0.19	-2.50	0.29	-2.84	0.20	-2.06	0.23	-0.87	0.16	-0.62	0.20	-0.14	0.13	0.03	0.16
b2009	JW1991	gene2054	sbmC	1050.00	201.04	-1.23	0.26	-5.53	0.16	-6.80	0.32	-5.94	0.34	-4.59	0.21	-3.23	0.27	-1.30	0.16	-1.14	0.19	-0.95	0.14	-0.10	0.18
b2010	JW5329	gene2055	dacD	22.33	4.10	0.67	0.56	1.05	0.23	0.75	0.35	0.65	0.52	-0.11	0.40	-0.66	0.47	-0.02	0.36	-0.34	0.41	-0.39	0.37	0.23	0.28
b2011	JW1993	gene2056	sbcB	239.00	39.46	0.26	0.25	-0.46	0.11	-0.45	0.15	-0.17	0.21	-0.01	0.17	0.14	0.18	-0.05	0.17	-0.40	0.18	0.07	0.14	-0.31	0.23
b2012	JW1994	gene2057	yeeD	296.00	53.11	-2.40	0.39	-3.66	0.15	-2.63	0.23	-2.85	0.82	-3.55	0.25	0.55	0.20	-4.11	0.23	-0.57	0.76	-1.43	0.16	-1.62	0.15
b2013	JW1995	gene2058	yeeE	624.33	119.76	-2.58	0.28	-3.52	0.18	-3.15	0.19	-2.92	1.03	-3.71	0.55	-0.30	0.27	-5.25	0.23	-0.53	0.80	-2.05	0.15	-1.27	0.21
b2014	JW5330	gene2059	plaP	79.67	8.67	0.76	0.40	4.88	0.15	5.99	0.14	4.38	0.77	2.66	0.24	1.19	0.57	-3.27	0.35	-3.39	0.38	-1.40	0.26	-0.78	0.21
b0210	JW0200	gene206	yafE	32.00	5.77	1.25	0.46	0.47	0.20	-0.48	0.36	-0.04	0.38	-1.64	0.43	-0.96	0.37	0.72	0.27	-0.37	0.34	-0.16	0.32	-0.31	0.24
b4678	Null	gene2060	yoeI	1.00	0.58	1.07	0.79	8.55	0.77	6.59	0.79	5.26	1.13	2.79	1.01	1.21	1.25	-1.93	1.26	-0.75	0.98	-0.96	0.71	0.19	0.51
b2015	JW5834	gene2061	yeeY	143.00	24.17	0.52	0.32	-2.57	0.16	-3.22	0.30	-3.42	0.37	-3.46	0.33	-2.06	0.28	-0.53	0.20	-0.78	0.22	-0.61	0.18	-0.12	0.17
b2016	JW1998	gene2062	yeeZ	551.00	84.61	-0.04	0.22	-2.13	0.10	-2.06	0.15	-1.80	0.21	-1.59	0.16	-0.95	0.19	-0.59	0.14	-0.51	0.17	-0.38	0.12	-0.12	0.15
b4539	JW5331	gene2063	yoeB	36.67	4.67	0.24	0.44	0.20	0.19	-1.62	0.40	-1.97	0.45	-1.40	0.37	-0.66	0.37	-0.64	0.32	-1.00	0.35	-0.45	0.30	-0.08	0.26
b2017	JW5835	gene2064	yefM	88.67	19.41	0.00	0.41	-0.60	0.18	-1.65	0.29	-1.52	0.37	-1.00	0.27	-0.61	0.32	-0.48	0.23	-0.85	0.28	-0.44	0.23	-0.39	0.21
b2018	JW2000	gene2065	hisL	3.67	1.20	-1.31	0.79	-1.58	0.72	-1.13	1.07	-0.39	0.94	-1.45	1.07	-0.15	0.86	0.50	0.70	-1.90	0.92	-1.23	0.75	-0.80	0.48
b2019	JW2001	gene2066	hisG	60.33	12.45	1.16	0.39	0.40	0.25	-0.50	0.27	-0.39	0.34	0.02	0.26	-0.79	0.30	-0.77	0.26	-0.28	0.27	-0.62	0.26	-0.22	0.23
b2020	JW2002	gene2067	hisD	74.33	19.33	1.46	0.53	-0.12	0.31	-0.80	0.27	-0.87	0.37	-0.37	0.28	-1.21	0.34	-0.88	0.27	-0.17	0.27	-0.73	0.25	-0.39	0.27
b2021	JW2003	gene2068	hisC	92.00	15.13	0.71	0.48	-0.35	0.26	-0.92	0.24	-1.01	0.32	-0.73	0.24	-1.36	0.30	-1.14	0.23	-0.78	0.25	-0.83	0.22	-0.71	0.18
b2022	JW2004	gene2069	hisB	178.67	23.13	0.18	0.45	-0.87	0.21	-0.97	0.21	-0.58	0.32	-0.08	0.18	-0.49	0.25	-0.25	0.19	-0.35	0.19	-0.41	0.16	-0.50	0.15
b0211	JW5018	gene207	mltD	221.00	33.08	2.23	0.61	1.96	0.11	3.21	0.12	2.64	0.52	2.72	0.17	2.77	0.35	0.55	0.17	0.72	0.19	1.51	0.14	1.11	0.17
b2023	JW2005	gene2070	hisH	38.33	3.93	1.28	0.41	-0.25	0.32	-0.68	0.35	-0.95	0.40	0.08	0.33	-0.36	0.36	-0.39	0.30	0.06	0.31	-0.30	0.29	0.03	0.23
b2024	JW2006	gene2071	hisA	28.33	4.48	1.56	0.46	0.35	0.31	-0.90	0.43	-0.23	0.36	0.74	0.34	0.08	0.47	-0.12	0.32	0.25	0.32	-0.05	0.31	0.33	0.27
b2025	JW2007	gene2072	hisF	56.67	7.88	0.47	0.35	-0.11	0.26	-0.80	0.29	-0.39	0.35	0.07	0.25	-0.30	0.30	-0.51	0.26	-0.37	0.27	-0.31	0.24	-0.58	0.20
b2026	JW2008	gene2073	hisI	52.00	11.00	0.62	0.43	0.16	0.26	0.09	0.27	0.26	0.39	1.03	0.24	0.71	0.31	0.58	0.25	0.57	0.26	0.48	0.23	0.05	0.21
b2027	JW5836	gene2074	wzzB	350.00	74.51	1.15	0.41	3.26	0.16	2.13	0.15	1.71	0.37	1.14	0.19	0.23	0.37	-0.60	0.18	-0.66	0.24	-0.24	0.16	0.06	0.20
b2028	JW2010	gene2075	ugd	36.33	4.81	-0.53	0.46	1.84	0.17	1.37	0.27	0.73	0.36	0.23	0.30	0.83	0.33	-0.22	0.30	-0.56	0.33	-0.69	0.31	-0.59	0.23
b2029	JW2011	gene2076	gnd	1859.67	363.32	-0.64	0.36	1.33	0.15	2.01	0.14	1.66	0.27	1.70	0.17	1.71	0.22	0.44	0.18	0.37	0.19	-0.32	0.14	-0.66	0.18
-	-	gene2077	wbbL	121.67	21.61	-0.78	0.39	1.68	0.15	1.17	0.17	0.94	0.23	0.95	0.21	1.11	0.23	0.22	0.23	-0.40	0.22	-0.57	0.20	-0.17	0.19
b0259	Null	gene2078	insH1	0.33	0.33	-0.09	0.49	-1.11	1.89	-1.51	2.51	-1.30	2.07	0.65	1.97	0.09	1.65	-0.07	1.22	-0.45	0.69	-0.31	0.48	-0.26	0.29
b2032	JW2017	gene2079	wbbK	103.33	19.54	-2.91	0.50	1.50	0.21	1.86	0.19	1.44	0.28	1.58	0.21	1.70	0.33	0.10	0.23	-0.46	0.28	-0.73	0.23	-0.48	0.21
b0212	JW0202	gene208	gloB	136.33	23.47	-1.07	0.37	-0.92	0.15	-0.75	0.20	-0.23	0.33	-0.12	0.21	0.40	0.24	1.17	0.18	0.84	0.21	0.15	0.17	0.32	0.17
b2033	JW2018	gene2080	wbbJ	65.33	10.99	-0.62	0.42	2.50	0.20	1.67	0.21	1.65	0.30	1.65	0.23	1.72	0.33	-0.29	0.25	-0.68	0.30	-0.91	0.26	-0.47	0.23
b2034	JW2019	gene2081	wbbI	163.00	29.09	-0.74	0.31	2.65	0.17	1.72	0.17	1.27	0.28	1.49	0.18	1.22	0.33	-0.52	0.20	-0.95	0.24	-1.10	0.19	-0.62	0.18
b2035	JW2020	gene2082	wbbH	88.33	21.23	-1.29	0.42	1.67	0.19	1.11	0.22	0.73	0.40	0.46	0.22	0.60	0.33	-0.71	0.25	-1.09	0.28	-1.27	0.24	-0.59	0.20
b2036	JW2021	gene2083	glf	196.33	41.17	-0.83	0.32	2.55	0.18	0.82	0.19	0.80	0.34	0.77	0.20	1.06	0.25	-0.34	0.21	-0.57	0.23	-0.98	0.19	-0.55	0.20
b2037	JW2022	gene2084	wzxB	154.67	25.65	-1.85	0.49	2.04	0.18	1.81	0.19	1.15	0.28	0.66	0.18	0.70	0.23	-0.81	0.23	-1.10	0.23	-1.33	0.19	-0.89	0.17
b2038	JW2023	gene2085	rfbC	62.67	4.67	-1.18	0.44	2.84	0.17	1.92	0.21	1.58	0.31	1.10	0.24	1.36	0.26	-0.45	0.28	-0.58	0.29	-0.68	0.25	-0.62	0.22
b2039	JW2024	gene2086	rfbA	150.33	29.76	-0.19	0.42	2.65	0.14	1.77	0.16	1.48	0.30	1.42	0.20	1.62	0.28	-0.52	0.21	-0.69	0.24	-0.82	0.20	-0.53	0.18
b2040	JW2025	gene2087	rfbD	278.67	48.42	-0.64	0.38	2.00	0.12	1.76	0.13	1.32	0.28	1.17	0.17	1.02	0.31	-0.85	0.18	-0.89	0.20	-0.88	0.17	-0.98	0.17
b2041	JW2026	gene2088	rfbB	395.33	68.01	-0.41	0.23	2.32	0.12	1.88	0.12	1.41	0.27	1.14	0.16	0.52	0.34	-0.92	0.17	-0.90	0.18	-1.04	0.15	-0.84	0.16
b2042	JW2027	gene2089	wcaN	662.33	122.99	-0.17	0.26	0.95	0.15	1.17	0.14	0.76	0.35	0.58	0.18	-0.06	0.27	-0.81	0.16	-0.49	0.23	-0.47	0.15	-0.12	0.24
b0213	JW0203	gene209	yafS	65.67	15.60	0.18	0.38	-0.27	0.16	-0.10	0.26	0.34	0.33	-0.09	0.25	0.55	0.27	1.08	0.21	0.77	0.24	0.54	0.22	0.32	0.20
b2043	JW2028	gene2090	wcaM	10.00	1.53	-0.06	0.73	1.32	0.32	0.50	0.53	0.89	0.48	0.67	0.48	0.38	0.49	0.14	0.49	0.03	0.51	-0.08	0.48	-0.02	0.34
b2044	JW2029	gene2091	wcaL	7.00	1.00	1.65	0.72	0.74	0.39	-0.26	0.71	-0.10	0.66	-0.19	0.64	-0.05	0.61	-0.96	0.68	-0.48	0.73	0.34	0.52	0.32	0.37
b2045	JW2030	gene2092	wcaK	15.33	3.38	-0.29	0.61	-1.11	0.35	-0.99	0.56	-1.14	0.58	-0.89	0.55	-0.97	0.51	-1.06	0.48	-0.81	0.57	-0.62	0.45	-0.83	0.32
b2046	JW2031	gene2093	wzxC	6.67	3.48	-0.30	0.79	-0.20	0.60	-1.79	1.02	-1.15	1.00	-1.51	0.91	-1.25	0.89	-1.92	0.83	-0.74	0.73	-1.00	0.69	-0.30	0.44
b2047	JW2032	gene2094	wcaJ	6.67	0.88	-0.19	0.74	-0.35	0.45	-0.98	0.84	-1.71	0.90	-1.31	0.78	-1.96	0.84	-1.59	0.74	-0.85	0.66	-0.68	0.60	-0.38	0.39
b2048	JW2033	gene2095	cpsG	12.00	2.89	-0.76	0.69	-0.31	0.39	-2.02	0.74	-1.87	0.76	-3.01	0.86	-1.54	0.64	-1.81	0.60	-0.33	0.50	-0.21	0.46	-0.15	0.32
b2049	JW2034	gene2096	cpsB	9.00	0.58	0.01	0.71	-0.26	0.37	-2.64	0.93	-2.19	0.86	-2.26	0.79	-1.13	0.65	-1.04	0.60	-1.34	0.64	-0.86	0.55	-0.53	0.38
b2050	JW2035	gene2097	wcaI	3.33	2.03	0.31	0.81	0.74	0.63	-0.53	1.14	-1.89	1.38	-4.63	1.97	-1.35	1.20	-0.69	0.98	-0.13	0.89	-0.32	0.74	-0.26	0.48
b2051	JW5335	gene2098	wcaH	1.67	0.67	0.09	0.79	0.80	0.78	-1.30	1.52	-3.74	1.95	-1.55	1.44	-1.88	1.39	-0.87	1.08	-1.02	0.97	-0.42	0.79	-0.87	0.50
b2052	JW2037	gene2099	wcaG	6.33	2.33	-0.59	0.80	0.84	0.47	-2.05	1.04	-1.76	0.92	-1.11	0.83	-1.79	0.91	-1.86	0.84	-0.72	0.71	-0.89	0.65	-1.06	0.43
-	-	gene21	insA	0.67	0.67	2.10	0.79	5.47	0.91	4.40	1.03	2.72	1.26	0.42	1.61	0.05	1.56	0.93	1.11	-0.20	0.99	-0.20	0.77	-0.07	0.47
b0214	JW0204	gene210	rnhA	81.33	9.40	0.06	0.35	0.87	0.13	0.85	0.20	0.55	0.30	-0.14	0.27	-0.21	0.27	-0.45	0.23	-0.55	0.25	-0.30	0.21	-0.55	0.19
b2053	JW2038	gene2100	gmd	5.00	2.08	0.26	0.79	1.71	0.51	-0.90	0.94	-0.64	0.84	-0.95	0.89	-0.41	0.78	0.09	0.69	-0.40	0.72	-0.52	0.67	-0.25	0.46
b2054	JW2039	gene2101	wcaF	0.33	0.33	-0.09	0.49	2.70	1.33	-1.51	2.51	-1.30	2.07	1.44	1.75	-1.00	1.52	0.34	1.25	-0.03	0.86	-0.31	0.48	0.07	0.43
b2055	JW2040	gene2102	wcaE	1.00	0.58	-0.30	0.56	2.98	0.92	-3.04	2.37	-2.81	2.05	-0.67	1.74	-0.34	1.48	-0.66	1.23	0.20	0.98	-0.92	0.70	-0.09	0.50
b2056	JW2041	gene2103	wcaD	2.67	2.19	0.06	0.77	0.88	0.81	-4.26	2.22	-2.16	1.66	-1.82	1.46	-1.50	1.32	-1.37	1.10	-0.69	0.95	-1.04	0.80	-0.29	0.50
b2057	JW2042	gene2104	wcaC	5.33	2.96	-0.49	0.80	-0.38	0.60	-2.20	1.19	-2.65	1.26	-1.22	0.93	-1.33	0.93	-0.34	0.72	-0.17	0.73	-0.06	0.63	-0.33	0.46
b2058	JW2043	gene2105	wcaB	1.33	0.33	-0.08	0.76	-1.11	0.95	-3.67	2.27	-1.67	1.60	-1.19	1.51	-0.42	1.25	-1.22	1.20	-0.19	0.96	-0.34	0.80	-0.17	0.51
b2059	JW2044	gene2106	wcaA	6.67	1.20	-1.09	0.80	-0.71	0.54	-2.27	1.01	-2.03	0.99	-1.84	0.84	-2.62	0.95	-1.76	0.77	-1.03	0.70	-0.54	0.59	-0.76	0.42
b2060	JW2045	gene2107	wzc	7.00	1.53	-0.30	0.74	0.58	0.46	-1.64	0.88	-1.96	0.88	-1.48	0.80	-1.19	0.74	-0.31	0.61	-0.95	0.68	-0.39	0.57	-0.52	0.39
b2061	JW2046	gene2108	wzb	0.33	0.33	-0.12	0.49	1.55	1.48	-0.08	2.33	-1.42	2.07	-1.70	2.22	-1.10	1.54	-0.34	1.21	-0.01	0.90	-0.38	0.51	-0.04	0.38
b2062	JW2047	gene2109	wza	2.67	0.33	-1.07	0.77	1.24	0.63	-0.93	1.22	-0.96	1.07	-2.90	1.49	-2.49	1.30	-3.32	1.21	-1.90	0.96	-1.29	0.79	-0.78	0.50
b0215	JW0205	gene211	dnaQ	689.00	117.63	-0.81	0.23	-1.33	0.10	-1.31	0.13	-1.48	0.31	-1.73	0.17	-1.26	0.19	-0.92	0.14	-1.07	0.18	-0.90	0.12	-0.59	0.15
b2063	JW5336	gene2110	yegH	194.33	36.10	-0.24	0.30	-0.22	0.11	0.00	0.16	-0.59	0.33	-0.29	0.18	-0.32	0.23	0.53	0.15	0.94	0.18	0.12	0.15	-0.08	0.17
b2064	JW2049	gene2111	asmA	432.00	64.66	-0.79	0.22	-0.12	0.09	-0.60	0.13	-0.73	0.21	-0.84	0.16	-0.42	0.18	-0.76	0.15	-0.78	0.17	-0.47	0.13	-0.49	0.13
b2065	JW2050	gene2112	dcd	113.33	19.32	0.71	0.31	1.87	0.11	0.83	0.18	0.39	0.32	0.97	0.22	1.06	0.22	0.73	0.18	0.76	0.20	0.64	0.18	0.61	0.23
b2066	JW2051	gene2113	udk	75.67	16.76	0.93	0.31	3.92	0.14	3.03	0.16	2.00	0.43	1.55	0.21	1.48	0.40	-1.02	0.25	-0.30	0.28	0.21	0.21	0.05	0.19
b2067	JW2052	gene2114	yegE	699.67	112.37	-1.12	0.22	-4.43	0.09	-4.02	0.18	-4.22	0.28	-3.73	0.20	-2.89	0.34	-2.09	0.14	-1.79	0.17	-1.10	0.12	-0.82	0.14
b2068	JW2053	gene2115	alkA	81.67	8.84	0.03	0.38	-3.05	0.19	-3.53	0.40	-3.18	0.40	-2.73	0.33	-1.98	0.33	-0.91	0.24	-0.65	0.25	-0.47	0.22	-0.21	0.21
b2069	JW2054	gene2116	yegD	28.00	3.79	0.70	0.48	3.78	0.18	3.05	0.23	1.43	0.79	0.89	0.33	-0.64	0.39	-1.15	0.40	-0.67	0.39	0.10	0.32	0.14	0.25
b2070	JW2055	gene2117	yegI	30.67	7.86	0.22	0.50	-1.14	0.23	-1.59	0.44	-1.18	0.44	-1.31	0.41	-0.28	0.35	-0.04	0.32	-0.57	0.36	-0.03	0.31	-0.04	0.24
b2071	JW2056	gene2118	yegJ	0.33	0.33	-0.15	0.50	4.08	1.23	2.71	1.56	1.10	1.74	2.20	1.52	1.49	1.45	2.58	1.08	1.37	0.98	1.22	0.80	0.39	0.48
b2072	JW2057	gene2119	yegK	1.33	0.33	1.28	0.80	0.94	0.83	0.55	1.27	0.46	1.14	-0.33	1.36	-1.64	1.43	0.08	1.03	-0.17	0.95	-0.18	0.80	-0.22	0.51
b2073	JW2058	gene2120	yegL	4.67	1.33	-0.65	0.80	0.54	0.47	-0.82	0.95	-0.93	0.88	-0.89	0.87	-0.76	0.84	-0.17	0.71	-0.76	0.76	-1.07	0.72	-0.18	0.44
b4667	Null	gene2122	ibsA	0.00	0.00	NA	NA	2.64	2.11	NA	NA	NA	NA	1.33	2.22	1.71	1.64	2.53	1.25	0.87	0.87	1.17	0.76	0.49	0.41
b4668	Null	gene2124	ibsB	0.33	0.33	0.58	0.67	0.83	1.47	0.04	2.30	0.57	1.98	-0.16	2.11	-0.02	1.65	-0.88	1.09	0.35	0.95	0.75	0.79	0.07	0.41
b2074	JW5338	gene2125	mdtA	134.00	18.01	-0.91	0.37	-1.66	0.12	-1.32	0.21	-1.70	0.33	-1.76	0.23	-1.86	0.26	-1.78	0.22	-1.31	0.24	-1.25	0.20	-0.74	0.22
b2075	JW2060	gene2126	mdtB	158.67	28.59	-0.19	0.39	-1.32	0.13	-1.31	0.24	-1.65	0.30	-1.47	0.28	-1.58	0.26	-1.59	0.23	-1.06	0.23	-0.81	0.20	-0.38	0.22
b2076	JW2061	gene2127	mdtC	90.00	13.50	0.18	0.36	-0.76	0.16	-0.88	0.24	-1.48	0.36	-1.74	0.28	-1.09	0.29	-1.75	0.27	-0.87	0.28	-0.26	0.21	0.04	0.22
-	-	gene2128	mdtD	54.33	9.40	0.29	0.45	-1.71	0.19	-1.51	0.34	-2.14	0.41	-2.44	0.37	-1.74	0.38	-1.48	0.30	-1.15	0.32	-0.40	0.26	-0.18	0.22
b2078	JW2063	gene2129	baeS	40.33	11.39	-0.40	0.46	-1.21	0.23	-1.52	0.39	-1.45	0.43	-1.33	0.36	-0.86	0.36	-1.22	0.33	-0.57	0.34	0.02	0.28	-0.01	0.25
b0217	JW0206	gene213	yafT	1.67	0.67	2.17	0.78	6.40	0.63	4.45	0.71	3.66	0.82	2.55	0.83	0.40	1.02	1.93	0.78	0.99	0.83	0.28	0.77	0.03	0.51
b2079	JW2064	gene2130	baeR	107.33	17.84	0.49	0.27	-0.84	0.13	-0.85	0.22	-0.86	0.26	-0.74	0.22	-0.72	0.23	-1.06	0.22	-0.98	0.24	-0.27	0.19	-0.11	0.19
b2080	JW5339	gene2131	yegP	2019.67	327.61	-1.42	0.39	-7.75	0.16	-9.09	0.46	-8.76	0.45	-7.27	0.27	-3.78	0.30	-0.54	0.13	0.24	0.19	0.31	0.11	0.36	0.15
b2081	JW2066	gene2132	yegQ	469.33	74.62	0.34	0.26	1.27	0.09	1.34	0.12	0.09	0.66	-1.16	0.17	-2.13	0.41	-3.03	0.17	-2.20	0.20	-1.06	0.14	-0.69	0.20
b2082	JW2067	gene2134	ogrK	5.00	2.52	-0.64	0.80	0.08	0.57	1.57	0.64	1.45	0.75	1.80	0.59	2.31	0.62	1.52	0.57	1.40	0.62	0.64	0.58	0.88	0.43
-	-	gene2135	yegZ	2.67	0.88	-0.99	0.76	0.06	0.69	-2.60	1.63	-2.53	1.46	-2.04	1.37	-0.37	1.09	0.71	0.77	0.35	0.79	-0.07	0.74	0.03	0.48
b2085	JW5837	gene2136	yegR	2.00	1.00	-0.59	0.77	0.34	0.78	-1.03	1.38	-0.72	1.26	0.37	1.05	0.17	1.01	2.39	0.69	1.87	0.70	0.77	0.71	0.89	0.47
b2086	JW2070	gene2137	yegS	350.67	52.60	0.08	0.33	-4.47	0.15	-6.22	0.42	-6.07	0.44	-4.12	0.24	-2.05	0.38	-0.64	0.15	-0.04	0.20	-0.10	0.13	0.34	0.18
-	-	gene2138	gatR	91.67	12.02	2.18	0.41	-0.79	0.14	-1.20	0.25	0.63	0.60	1.07	0.22	2.08	0.23	2.20	0.18	2.20	0.22	2.01	0.16	0.66	0.35
b0298	Null	gene2139	insE1	0.00	0.00	NA	NA	3.21	2.08	NA	NA	1.45	2.07	NA	NA	NA	NA	0.65	1.05	0.90	0.88	NA	NA	0.17	0.27
b4586	Null	gene214	ykfM	0.67	0.67	-0.22	0.51	0.14	1.24	-0.83	2.17	-0.62	1.96	0.56	1.58	-0.08	1.52	-1.47	1.22	0.22	0.99	-0.06	0.76	-0.40	0.41
b0299	Null	gene2140	insF1	4.00	1.53	0.95	0.80	-0.40	0.56	0.49	0.84	-1.15	1.00	-3.33	1.43	-4.10	1.50	-3.72	1.18	-1.74	0.92	-1.96	0.79	-1.32	0.49
b2091	JW2075	gene2141	gatD	673.67	160.87	1.38	0.37	-3.96	0.20	-4.51	0.24	0.99	1.00	2.36	0.20	2.58	0.26	2.79	0.18	2.96	0.27	2.68	0.16	1.12	0.37
-	-	gene2142	gatC	1431.33	340.91	1.37	0.37	-4.08	0.16	-3.94	0.18	1.10	0.93	2.83	0.18	4.07	0.22	4.36	0.17	3.92	0.20	3.33	0.14	1.23	0.48
b2093	JW2077	gene2143	gatB	144.00	30.92	1.79	0.34	-2.62	0.15	-3.93	0.35	1.67	0.96	3.12	0.18	4.17	0.19	4.61	0.19	4.05	0.21	3.29	0.13	1.82	0.38
b2094	JW2081; JW2078	gene2144	gatA	644.00	112.51	1.55	0.26	-3.08	0.09	-4.16	0.19	1.23	0.98	2.17	0.15	2.91	0.18	2.43	0.16	2.22	0.27	1.97	0.11	0.74	0.33
b2095	JW2082	gene2145	gatZ	10281.67	1840.96	0.62	0.20	-5.09	0.10	-5.12	0.11	-0.65	0.87	0.30	0.13	1.01	0.16	0.73	0.14	0.66	0.23	0.54	0.10	-0.22	0.27
b2096	JW5343	gene2146	gatY	13168.67	2327.54	0.21	0.16	-5.56	0.08	-5.25	0.11	-1.36	0.80	-0.47	0.13	-0.01	0.15	0.11	0.12	0.10	0.16	0.07	0.10	-0.30	0.20
b2097	JW5344	gene2147	fbaB	5409.67	929.08	-1.63	0.19	-8.85	0.12	-8.03	0.21	-7.00	0.31	-5.21	0.18	-2.16	0.31	0.16	0.11	1.25	0.22	1.57	0.09	0.75	0.23
b2098	JW2085	gene2148	yegT	18.33	5.49	-0.27	0.57	-0.60	0.29	-0.17	0.46	0.18	0.64	0.32	0.40	0.23	0.41	-0.27	0.42	-0.27	0.48	0.04	0.38	-0.21	0.30
b2099	JW2086	gene2149	yegU	20.67	8.74	0.26	0.57	-0.16	0.31	-0.09	0.46	0.31	0.51	0.38	0.41	0.90	0.44	-0.23	0.41	-0.01	0.47	-0.17	0.40	-0.24	0.35
-	-	gene215	yafU	0.00	0.00	1.30	0.74	4.13	2.01	3.74	2.28	2.12	2.10	1.33	2.22	NA	NA	NA	NA	NA	NA	NA	NA	0.07	0.22
b2100	JW2087	gene2150	yegV	12.67	2.33	0.36	0.60	0.67	0.31	0.13	0.50	0.22	0.55	0.73	0.44	0.80	0.43	-0.44	0.48	-0.03	0.47	-0.14	0.45	0.10	0.32
b2101	JW2088	gene2151	yegW	28.00	5.51	-0.29	0.52	0.21	0.21	0.56	0.32	0.37	0.36	0.76	0.31	1.25	0.37	0.65	0.30	0.22	0.33	0.43	0.30	0.13	0.25
b2102	JW5345	gene2152	yegX	6.33	2.19	1.64	0.62	2.64	0.36	2.00	0.54	1.22	0.59	0.85	0.60	1.13	0.56	1.10	0.53	-0.02	0.62	-0.04	0.61	-0.12	0.42
b2103	JW2090	gene2153	thiD	18.67	3.18	-0.65	0.66	0.61	0.25	1.06	0.35	-0.21	0.51	-0.60	0.44	-0.31	0.42	-0.66	0.42	-0.52	0.43	-0.96	0.43	-0.27	0.29
b2104	JW2091	gene2154	thiM	23.67	1.86	0.87	0.50	1.16	0.22	2.18	0.27	1.31	0.46	0.32	0.35	0.12	0.37	0.51	0.34	-0.07	0.37	0.50	0.31	-0.18	0.28
b2105	JW2092	gene2155	rcnR	10.67	1.76	-0.97	0.72	0.70	0.32	0.72	0.48	0.83	0.48	0.47	0.48	1.18	0.45	2.26	0.36	1.91	0.38	1.80	0.36	1.44	0.30
b2106	JW2093	gene2156	rcnA	7.33	1.76	1.27	0.64	2.49	0.35	1.70	0.50	0.94	0.60	-0.35	0.64	0.48	0.55	0.61	0.52	0.43	0.57	0.51	0.52	0.21	0.38
b2107	JW5346	gene2157	rcnB	40.00	7.23	0.46	0.41	1.59	0.19	1.94	0.24	1.97	0.33	2.37	0.24	2.05	0.29	1.63	0.23	1.92	0.26	1.75	0.22	1.27	0.23
b2108	JW2095	gene2158	yehA	1.33	0.67	-0.51	0.64	1.08	0.81	-0.87	1.59	-0.26	1.61	-0.12	1.29	-1.64	1.48	-0.49	1.11	0.65	0.89	-0.66	0.80	-0.01	0.51
b2109	JW2096	gene2159	yehB	4.00	1.00	-0.17	0.80	0.52	0.50	0.42	0.81	-0.15	0.82	1.74	0.65	0.51	0.76	2.05	0.57	1.41	0.59	-0.05	0.66	0.42	0.42
-	-	gene216	yafF	0.00	0.00	0.79	0.64	5.41	1.91	4.85	2.13	4.27	1.90	3.06	2.13	NA	NA	1.92	1.26	0.41	0.69	NA	NA	0.29	0.34
b2110	JW2097	gene2160	yehC	1.00	0.58	-0.30	0.56	-0.93	1.40	-3.04	2.37	-1.12	1.76	1.25	1.24	0.03	1.36	2.12	0.90	1.17	0.92	0.93	0.78	0.35	0.51
b2111	JW2098	gene2161	yehD	5.00	2.08	-1.18	0.80	-2.01	0.69	-5.30	2.08	-2.60	1.19	3.09	0.49	2.92	0.59	4.26	0.43	3.43	0.46	2.12	0.47	1.50	0.39
b2112	JW2099	gene2162	yehE	113.00	23.86	-1.66	0.38	-2.92	0.18	-3.16	0.33	-3.59	0.42	-2.21	0.29	-0.48	0.38	1.75	0.17	1.87	0.21	1.20	0.18	0.94	0.17
b2113	JW2100	gene2163	mrp	405.33	83.75	0.13	0.22	0.59	0.10	0.66	0.15	0.49	0.29	0.90	0.17	1.00	0.19	0.15	0.16	0.53	0.17	0.52	0.13	0.49	0.15
b2114	JW2101	gene2164	metG	815.67	128.17	0.16	0.20	1.59	0.08	1.91	0.10	1.24	0.29	1.01	0.14	0.81	0.28	-1.23	0.13	-0.83	0.19	-0.04	0.11	-0.04	0.14
-	-	gene2165	yehH	9.67	0.33	1.10	0.59	1.60	0.33	1.19	0.47	1.08	0.48	0.10	0.53	0.62	0.47	0.33	0.52	-0.07	0.52	-0.27	0.50	-0.55	0.37
b2118	JW2105	gene2166	yehI	20.00	2.65	0.27	0.53	-0.27	0.25	-0.62	0.45	-0.17	0.41	-0.11	0.39	0.14	0.38	0.09	0.36	-0.03	0.38	0.54	0.33	0.02	0.27
b4541	JW2106	gene2167	yehK	0.00	0.00	1.09	0.70	2.78	2.18	NA	NA	NA	NA	NA	NA	NA	NA	NA	NA	NA	NA	0.59	0.63	0.06	0.21
b2119	JW5349	gene2168	yehL	0.67	0.33	0.42	0.72	2.90	0.99	2.96	1.18	2.02	1.32	1.45	1.35	0.33	1.35	-0.58	1.25	-0.12	0.99	0.28	0.80	0.05	0.49
b2120	JW2108	gene2169	yehM	7.00	2.00	1.95	0.56	-0.10	0.43	-0.19	0.70	-0.74	1.04	-0.40	0.69	-0.24	0.64	-0.12	0.61	-0.08	0.61	-0.20	0.57	-0.17	0.39
b0219	JW5019	gene217	yafV	161.00	26.85	-0.18	0.33	-2.63	0.13	-2.57	0.24	-2.07	0.26	-2.02	0.23	-1.00	0.25	0.20	0.17	0.06	0.20	-0.01	0.16	0.27	0.16
b2121	JW5350	gene2170	yehP	6.67	3.28	-0.51	0.78	-1.54	0.53	-1.09	0.88	-0.75	0.81	-1.82	0.95	-1.83	0.91	-0.66	0.69	-0.78	0.71	-0.56	0.62	-0.47	0.42
-	-	gene2171	yehQ	21.00	0.58	0.73	0.48	-1.86	0.29	-1.94	0.55	-1.72	0.57	-2.06	0.53	-1.23	0.51	-0.64	0.40	-0.32	0.42	-0.41	0.38	-0.31	0.27
b2123	JW5351	gene2172	yehR	3.67	0.88	-0.66	0.81	0.85	0.58	0.81	0.80	0.07	0.83	0.47	0.78	0.30	0.83	0.25	0.73	0.42	0.71	-0.15	0.67	-0.25	0.46
b2124	JW2112	gene2173	yehS	31.33	9.21	1.52	0.55	3.11	0.19	2.51	0.24	2.12	0.35	1.46	0.29	1.25	0.37	0.21	0.33	-0.16	0.39	0.49	0.30	0.29	0.25
-	-	gene2174	yehT	27.33	4.33	0.92	0.45	0.64	0.22	0.01	0.36	1.64	0.69	1.77	0.29	2.00	0.32	0.51	0.33	0.11	0.35	0.22	0.31	-0.16	0.31
-	-	gene2175	yehU	68.00	10.82	0.68	0.34	-0.22	0.16	-0.58	0.29	1.34	0.48	1.39	0.21	1.56	0.30	0.04	0.23	-0.05	0.25	0.38	0.21	-0.09	0.24
b2127	JW2115	gene2176	mlrA	437.00	64.86	-0.09	0.30	-6.62	0.16	-6.43	0.40	-5.81	0.39	-5.36	0.29	-2.95	0.35	-0.82	0.15	-0.27	0.16	-0.05	0.12	0.14	0.15
b4542	JW5354	gene2177	yohO	8.67	0.88	1.47	0.57	-0.50	0.44	-0.08	0.61	-0.14	0.56	-1.63	0.77	-1.03	0.63	-0.14	0.53	0.45	0.49	0.06	0.50	-0.47	0.36
b2128	JW2116	gene2178	yehW	50.33	10.87	-0.52	0.47	-4.15	0.27	-5.05	0.75	-4.32	0.64	-2.53	0.40	-1.09	0.49	-1.04	0.31	0.15	0.30	0.61	0.23	0.41	0.23
b2129	JW2117	gene2179	yehX	56.67	9.67	-0.71	0.47	-4.28	0.27	-4.66	0.64	-5.24	0.75	-3.06	0.40	-1.56	0.52	-1.22	0.28	-0.19	0.28	0.28	0.23	0.60	0.22
b0220	JW0210	gene218	ivy	316.33	58.56	-1.06	0.25	-1.74	0.14	-2.34	0.18	-1.91	0.28	-1.57	0.18	-0.52	0.20	0.90	0.15	1.54	0.17	1.42	0.12	1.50	0.14
b2130	JW2118	gene2180	yehY	96.67	17.70	-0.12	0.36	-4.98	0.25	-6.84	0.93	-5.27	0.64	-3.20	0.35	-1.93	0.52	-1.96	0.27	-0.01	0.31	0.19	0.20	0.38	0.25
b2131	JW2119	gene2181	osmF	810.33	132.27	-1.32	0.37	-5.58	0.11	-6.23	0.29	-5.96	0.34	-4.38	0.19	-2.44	0.43	-1.05	0.13	-0.28	0.22	-0.33	0.11	-0.14	0.16
b2132	JW2120	gene2182	bglX	246.67	44.30	-0.12	0.26	0.54	0.11	0.85	0.14	0.65	0.24	1.11	0.16	1.02	0.23	0.09	0.15	0.36	0.17	0.09	0.14	-0.12	0.15
b2133	JW2121	gene2183	dld	507.33	78.08	-0.11	0.20	-1.85	0.13	-1.73	0.15	-1.22	0.31	-0.18	0.14	0.39	0.28	1.38	0.13	1.52	0.18	1.08	0.11	0.53	0.22
b2134	JW5355	gene2184	pbpG	79.00	15.57	1.56	0.35	2.36	0.13	1.58	0.18	1.63	0.27	1.17	0.21	0.72	0.29	-0.15	0.22	-0.16	0.25	0.13	0.21	0.03	0.19
b2135	JW5356	gene2185	yohC	1236.00	196.52	-0.40	0.38	-9.29	0.26	-9.60	0.68	-9.89	0.77	-8.75	0.47	-6.42	0.42	-3.03	0.17	-2.29	0.22	-1.47	0.14	-0.31	0.19
b2136	JW2124	gene2186	yohD	178.33	31.59	0.03	0.27	-3.05	0.14	-3.29	0.27	-3.19	0.35	-2.85	0.26	-1.79	0.34	-0.50	0.19	-0.19	0.20	-0.17	0.16	0.02	0.18
b2137	JW2125	gene2187	yohF	367.67	73.71	-0.39	0.44	-6.57	0.19	-7.32	0.58	-7.57	0.65	-5.37	0.31	-3.63	0.62	-1.60	0.16	-0.77	0.18	-0.86	0.14	-0.15	0.22
-	-	gene2188	mdtQ	3.00	1.15	1.18	0.75	0.87	0.59	-0.20	1.03	-0.87	1.08	0.03	0.91	0.36	0.84	-0.24	0.84	-0.01	0.79	-0.47	0.74	-0.50	0.49
b4679	Null	gene2189	yohP	17.00	2.00	0.86	0.56	-3.99	0.43	-4.42	1.04	-3.94	0.91	-4.73	1.00	-2.39	0.64	0.39	0.39	0.50	0.41	-0.38	0.42	0.10	0.38
b0221	JW5020	gene219	fadE	772.00	142.58	0.81	0.44	-5.33	0.12	-5.70	0.26	-3.17	0.67	-5.38	0.24	-4.98	0.26	-1.39	0.14	-1.42	0.20	-2.13	0.16	-0.34	0.38
b2140	JW2128	gene2190	dusC	8.33	1.20	1.51	0.64	4.59	0.30	2.80	0.40	2.30	0.70	1.24	0.48	0.24	0.61	-1.00	0.62	-0.35	0.58	0.18	0.50	0.87	0.37
b2141	JW2129	gene2191	yohJ	68.33	11.26	-1.48	0.46	-1.59	0.20	-3.01	0.40	-4.14	0.56	-3.64	0.42	-1.79	0.35	-1.10	0.26	-1.03	0.31	-1.37	0.28	-0.45	0.20
b2142	JW2130	gene2192	yohK	68.00	11.06	0.00	0.38	-1.18	0.21	-2.29	0.35	-3.14	0.71	-3.01	0.38	-0.92	0.31	-0.17	0.25	-0.07	0.28	-0.36	0.23	0.14	0.25
b2143	JW2131	gene2193	cdd	95.00	12.86	1.42	0.27	-0.56	0.13	-0.86	0.23	1.69	0.57	1.99	0.19	-0.29	0.27	0.33	0.19	0.43	0.21	0.17	0.19	0.25	0.19
b2144	JW2132	gene2194	sanA	16.00	2.08	1.49	0.55	2.81	0.24	2.22	0.32	2.10	0.38	1.49	0.37	1.90	0.34	0.87	0.36	0.37	0.41	0.93	0.35	0.39	0.30
b2145	JW5359	gene2195	yeiS	1.67	0.33	1.38	0.78	4.09	0.65	2.21	0.91	2.77	0.80	2.35	0.88	2.71	0.78	2.01	0.77	1.54	0.76	1.02	0.72	0.85	0.49
b2146	JW2133	gene2196	preT	46.33	12.86	0.16	0.55	-2.16	0.25	-2.92	0.49	0.58	0.82	3.00	0.25	4.02	0.31	5.98	0.20	5.55	0.24	4.18	0.17	2.21	0.39
b2147	JW2134	gene2197	preA	28.00	6.81	0.50	0.66	-1.31	0.24	-1.92	0.54	0.56	0.69	3.00	0.25	3.73	0.30	6.04	0.22	5.62	0.24	4.11	0.21	2.40	0.38
b2148	JW2135	gene2198	mglC	36.00	9.54	1.12	0.41	-2.99	0.27	-3.02	0.54	3.16	1.04	2.69	0.33	1.11	0.46	2.04	0.27	0.36	0.36	0.00	0.29	-0.49	0.28
b2149	JW2136	gene2199	mglA	117.00	24.85	0.18	0.33	-4.10	0.26	-4.62	0.45	2.71	1.06	1.06	0.22	0.05	0.37	1.10	0.21	0.18	0.41	-0.38	0.19	-0.61	0.26
b0023	JW0022	gene22	rpsT	1003.00	139.51	0.10	0.31	3.17	0.13	3.63	0.11	2.81	0.49	1.63	0.17	1.12	0.37	-1.42	0.15	-1.81	0.18	-0.33	0.13	-0.54	0.15
b0222	JW0212	gene220	gmhA	625.67	94.38	-0.28	0.20	-0.25	0.08	-0.51	0.12	-0.44	0.19	-0.17	0.15	0.21	0.17	0.11	0.14	-0.10	0.17	-0.26	0.12	-0.01	0.14
b2150	JW2137	gene2200	mglB	461.00	84.66	0.08	0.29	-5.61	0.14	-4.93	0.27	2.14	1.08	1.76	0.17	1.18	0.47	2.16	0.18	1.20	0.25	0.42	0.13	-0.05	0.20
b2151	JW2138	gene2201	galS	39.00	5.57	0.82	0.41	-1.66	0.22	-2.40	0.45	1.99	0.89	0.82	0.28	0.62	0.36	1.42	0.24	0.75	0.28	0.98	0.24	-0.11	0.32
b2152	JW2139	gene2202	yeiB	35.33	7.33	1.52	0.37	1.80	0.19	0.34	0.30	0.39	0.34	-0.66	0.36	-0.45	0.38	-0.67	0.32	-0.21	0.34	0.35	0.29	0.32	0.24
b2153	JW2140	gene2203	folE	260.67	40.39	1.86	0.44	1.25	0.09	1.16	0.13	1.01	0.21	0.16	0.16	-0.15	0.25	0.40	0.16	0.79	0.17	0.72	0.13	0.14	0.15
b2154	JW2141	gene2204	yeiG	104.33	19.46	0.51	0.37	-1.71	0.16	-1.42	0.24	-0.30	0.37	-0.53	0.22	-0.24	0.36	1.80	0.17	1.93	0.19	1.35	0.16	1.01	0.23
b2155	JW2142	gene2205	cirA	80.33	12.20	1.13	0.30	1.64	0.16	3.81	0.19	1.76	0.83	-2.81	0.33	-2.21	0.33	-1.60	0.26	-1.79	0.29	-1.63	0.26	-1.13	0.19
b2156	JW2143	gene2206	lysP	748.00	146.23	-0.64	0.29	0.07	0.10	0.24	0.12	-0.56	0.57	-1.25	0.20	-2.33	0.22	-2.07	0.15	-1.53	0.25	-0.69	0.13	-0.22	0.16
b2157	JW2144	gene2207	yeiE	74.33	5.55	1.55	0.33	-0.60	0.16	0.07	0.23	0.30	0.27	0.76	0.22	0.94	0.27	1.77	0.19	1.19	0.31	1.02	0.19	1.09	0.18
b2158	JW2145	gene2208	yeiH	51.33	12.86	1.02	0.40	-0.77	0.21	-0.30	0.29	-0.59	0.49	-0.10	0.30	-0.04	0.36	0.12	0.26	0.23	0.30	0.55	0.24	0.70	0.25
b2159	JW2146	gene2209	nfo	605.33	103.08	-1.53	0.25	-2.02	0.08	-1.67	0.13	-1.93	0.23	-1.85	0.17	-1.55	0.18	-1.63	0.14	-0.95	0.20	-0.41	0.12	-0.22	0.13
b0223	JW0213	gene221	yafJ	308.33	48.55	0.23	0.26	-0.06	0.09	0.15	0.13	0.27	0.18	-0.28	0.16	-0.20	0.20	-0.03	0.15	-0.32	0.20	-0.31	0.14	-0.43	0.15
b2160	JW2147	gene2210	yeiI	184.67	40.75	-0.48	0.30	-0.72	0.12	-0.50	0.18	-0.79	0.29	-0.86	0.20	-0.70	0.23	-1.17	0.19	-0.75	0.27	0.11	0.16	0.28	0.22
b2161	JW2148	gene2211	nupX	4.00	1.53	0.87	0.77	-0.19	0.54	-0.85	1.02	-1.45	1.07	-0.29	0.90	-0.77	0.89	0.57	0.69	0.07	0.72	0.30	0.64	0.75	0.44
b2162	JW2149	gene2212	rihB	2.33	1.45	-0.64	0.68	-2.66	1.01	-1.47	1.54	-1.36	1.56	0.46	1.05	0.48	1.00	1.08	0.81	0.09	0.87	0.37	0.74	-0.53	0.51
b2163	JW2150	gene2213	yeiL	1.33	0.88	0.94	0.81	1.33	0.83	1.05	1.23	1.82	1.12	1.61	1.05	2.26	0.94	1.77	0.86	1.91	0.81	1.22	0.74	0.70	0.50
b2164	JW2151	gene2214	psuT	19.33	3.38	1.31	0.52	-0.59	0.26	-1.54	0.54	-0.08	0.49	-0.84	0.46	0.19	0.40	0.58	0.34	0.12	0.40	0.06	0.37	0.08	0.27
b2165	JW2152	gene2215	psuG	5.33	1.20	-1.30	0.81	-1.17	0.54	-1.81	1.03	2.47	0.86	1.77	0.54	1.78	0.53	0.97	0.58	0.75	0.58	0.09	0.61	-0.71	0.43
b2166	JW2153	gene2216	psuK	3.67	0.33	-0.38	0.81	-1.08	0.59	-3.03	1.49	2.62	0.99	1.38	0.70	1.10	0.72	1.05	0.64	0.52	0.68	0.03	0.66	-0.21	0.45
b2167	JW2154	gene2217	fruA	278.67	51.24	0.37	0.26	1.38	0.15	0.59	0.18	3.62	0.68	-0.86	0.18	-2.39	0.32	-0.39	0.15	0.05	0.20	-0.22	0.14	0.39	0.19
b2168	JW2155	gene2218	fruK	126.67	18.55	0.02	0.36	1.68	0.16	0.92	0.19	3.87	0.71	-0.90	0.21	-2.35	0.40	-0.10	0.19	0.16	0.21	-0.11	0.18	0.53	0.20
b2169	JW2156	gene2219	fruB	19.33	8.88	3.66	0.57	4.60	0.27	4.05	0.29	6.70	0.80	2.31	0.37	0.48	0.48	1.93	0.32	2.36	0.37	1.34	0.33	1.22	0.30
b0224	JW0214	gene222	yafK	176.00	27.73	2.05	0.54	2.59	0.10	1.35	0.14	0.97	0.25	0.09	0.21	-0.84	0.33	-0.80	0.19	-0.83	0.25	-0.09	0.16	-0.19	0.19
b2170	JW2157	gene2220	setB	16.33	4.84	1.04	0.63	1.08	0.26	-0.07	0.48	-0.59	0.51	-0.68	0.48	-0.42	0.49	0.25	0.41	0.16	0.42	0.67	0.36	0.46	0.28
b4502	JW5361	gene2221	yeiW	1.00	0.58	3.29	0.77	4.44	0.81	2.12	1.15	1.50	1.22	-0.25	1.64	-1.16	1.53	-0.56	1.22	-0.05	0.99	-0.60	0.76	-0.86	0.44
b2171	JW5362	gene2222	yeiP	48.33	10.48	1.73	0.47	4.58	0.14	3.33	0.18	2.99	0.32	2.86	0.22	2.75	0.38	-0.36	0.27	0.17	0.28	0.41	0.24	0.59	0.20
b2172	JW2160	gene2223	yeiQ	32.67	6.12	0.73	0.42	0.75	0.20	0.54	0.30	2.63	0.65	0.55	0.29	0.62	0.30	2.10	0.23	2.10	0.25	1.25	0.26	0.37	0.23
b2173	JW2161	gene2224	yeiR	45.33	6.77	0.95	0.37	2.19	0.16	1.87	0.21	1.69	0.29	1.07	0.24	-0.24	0.33	-1.01	0.30	-0.18	0.36	0.29	0.24	0.45	0.22
b2174	JW2162	gene2225	lpxT	11.67	3.38	0.83	0.61	5.13	0.27	6.37	0.27	5.41	0.57	4.06	0.32	1.40	0.43	-0.70	0.53	-0.60	0.58	0.18	0.46	-0.50	0.34
b2175	JW2163	gene2226	mepS	65.67	11.70	1.02	0.39	4.90	0.14	4.31	0.15	5.05	0.36	5.37	0.20	4.73	0.26	3.92	0.17	3.71	0.21	2.91	0.19	1.14	0.30
b2176	JW2164	gene2227	rtn	80.00	12.53	0.23	0.44	-0.17	0.19	-0.19	0.23	0.41	0.32	-0.14	0.29	0.36	0.26	-0.60	0.23	-0.37	0.25	-0.38	0.22	-0.67	0.22
b2177	JW2165	gene2228	yejA	154.33	29.04	-0.42	0.35	-1.42	0.12	-1.24	0.20	-0.98	0.24	-0.95	0.22	-0.29	0.22	0.32	0.17	0.41	0.19	0.51	0.16	0.17	0.17
b2178	JW2166	gene2229	yejB	27.33	4.33	0.01	0.54	0.00	0.23	-0.29	0.37	-0.06	0.40	-0.33	0.38	0.30	0.34	0.20	0.31	0.67	0.32	0.73	0.29	0.46	0.25
b0225	JW0215	gene223	yafQ	14.00	4.16	2.60	0.47	1.58	0.27	0.35	0.46	0.63	0.50	0.16	0.49	1.85	0.39	1.59	0.36	1.23	0.38	0.77	0.38	0.60	0.30
b2179	JW2167	gene2230	yejE	27.33	5.81	0.27	0.53	-0.18	0.22	-0.33	0.37	-0.21	0.38	-0.08	0.34	0.13	0.37	0.15	0.32	0.66	0.33	0.73	0.29	0.49	0.26
b2180	JW2168	gene2231	yejF	62.00	7.00	-0.59	0.46	0.00	0.15	0.02	0.24	0.35	0.33	0.58	0.26	1.03	0.25	0.59	0.22	1.09	0.24	1.27	0.20	0.48	0.23
b2181	JW2169	gene2232	yejG	272.33	61.20	1.20	0.28	0.13	0.17	-0.50	0.19	-0.83	0.42	-2.24	0.24	-2.24	0.37	0.28	0.18	-0.64	0.27	-1.48	0.19	-0.19	0.37
b2182	JW5363	gene2233	bcr	162.67	19.33	0.07	0.34	1.09	0.11	0.31	0.17	-0.31	0.36	-0.66	0.20	-0.89	0.23	-1.38	0.20	-1.06	0.22	-0.50	0.17	-0.25	0.21
b2183	JW2171	gene2234	rsuA	216.67	27.00	0.63	0.30	0.95	0.10	0.60	0.15	0.05	0.36	-0.33	0.19	-0.55	0.21	-0.82	0.18	-0.65	0.20	-0.49	0.15	-0.09	0.21
b2184	JW2172	gene2235	yejH	140.00	15.62	-0.13	0.31	-0.53	0.12	-0.56	0.19	-0.98	0.26	-1.22	0.22	-0.79	0.23	-1.42	0.21	-0.94	0.23	-0.44	0.18	-0.76	0.19
b2185	JW2173	gene2236	rplY	415.67	65.27	1.12	0.36	4.18	0.10	3.79	0.10	3.30	0.44	2.61	0.16	2.61	0.28	-1.57	0.16	-0.88	0.29	0.94	0.12	0.58	0.18
b2186	JW2174	gene2237	yejK	133.00	25.16	0.50	0.37	2.44	0.10	2.13	0.14	1.57	0.33	1.32	0.19	1.07	0.29	-0.52	0.21	-0.44	0.23	0.04	0.17	0.06	0.16
b2187	JW2175	gene2238	yejL	192.00	36.86	-0.49	0.41	0.31	0.17	0.94	0.17	0.39	0.41	-0.16	0.22	-0.33	0.28	-1.10	0.20	-0.73	0.24	-0.63	0.19	-0.82	0.20
b2188	JW2176	gene2239	yejM	559.67	96.06	-0.45	0.20	0.23	0.08	0.38	0.11	-0.17	0.37	-0.80	0.16	-0.75	0.23	-1.96	0.15	-1.39	0.17	-0.46	0.12	-0.47	0.14
b0226	JW0216	gene224	dinJ	179.33	38.62	-0.28	0.29	-2.31	0.16	-1.93	0.21	-1.93	0.33	-1.49	0.22	-0.55	0.22	0.01	0.17	-0.08	0.20	-0.14	0.17	-0.11	0.16
-	-	gene2241	yejO	86.33	13.28	0.38	0.33	-0.17	0.14	-0.94	0.27	-0.87	0.26	-0.79	0.25	-0.62	0.25	0.49	0.20	0.40	0.23	-0.02	0.20	0.32	0.18
b0259	Null	gene2242	insH1	7.33	7.33	-0.89	0.71	-3.87	2.30	-3.84	2.46	-1.93	1.65	-3.40	2.21	-2.06	1.64	-1.26	1.16	-0.79	0.82	-0.52	0.58	-0.22	0.26
b2193	JW2181	gene2243	narP	94.33	15.45	0.33	0.52	0.38	0.17	0.81	0.19	0.93	0.28	1.50	0.19	2.00	0.37	1.00	0.20	1.01	0.21	0.83	0.17	0.57	0.18
b2194	JW2182	gene2244	ccmH	41.67	8.37	-0.08	0.47	0.43	0.17	0.00	0.29	-0.37	0.35	1.01	0.26	1.19	0.39	0.31	0.27	-0.19	0.30	0.21	0.27	0.19	0.25
b2195	JW2183	gene2245	dsbE	14.33	1.67	-0.09	0.64	0.72	0.30	-0.39	0.54	-0.42	0.51	1.06	0.45	0.76	0.46	0.07	0.44	-0.48	0.49	0.21	0.40	0.56	0.32
b2196	JW2184	gene2246	ccmF	45.33	6.94	0.65	0.42	0.42	0.19	-0.03	0.31	-0.63	0.40	1.45	0.27	0.82	0.38	-0.51	0.30	-0.24	0.31	0.09	0.27	0.15	0.25
b2197	JW2185	gene2247	ccmE	19.33	2.33	-0.57	0.58	0.07	0.26	-0.50	0.44	-0.71	0.50	1.59	0.36	0.68	0.41	-0.34	0.39	-0.73	0.43	-0.33	0.39	-0.17	0.27
b2198	JW2186	gene2248	ccmD	1.33	0.88	-0.43	0.62	0.03	1.03	-3.52	2.31	-1.58	1.73	-0.63	1.51	-0.05	1.22	-0.45	1.15	-0.13	0.98	-0.16	0.80	0.05	0.51
b2199	JW2187	gene2249	ccmC	38.67	7.17	-0.31	0.44	-0.73	0.22	-0.56	0.33	-0.82	0.42	1.28	0.36	0.45	0.43	-0.39	0.30	-0.26	0.32	-0.15	0.28	-0.22	0.25
b0227	JW0217	gene225	yafL	27.33	7.06	-0.41	0.54	-2.10	0.28	-2.52	0.56	-2.38	0.55	-3.24	0.60	-2.63	0.57	-0.06	0.34	0.05	0.36	-0.42	0.34	0.12	0.28
b2200	JW2188	gene2250	ccmB	15.00	3.46	0.35	0.58	-0.99	0.33	-1.24	0.65	-1.58	0.61	0.55	0.43	-0.15	0.53	-0.61	0.47	-0.77	0.57	0.09	0.41	0.08	0.32
b2201	JW5366	gene2251	ccmA	46.33	10.35	0.43	0.38	-1.19	0.20	-1.57	0.36	-1.71	0.39	1.24	0.28	0.35	0.31	-0.05	0.27	-0.25	0.30	0.24	0.25	0.31	0.23
b2202	JW2190	gene2252	napC	43.33	4.84	-0.93	0.47	-1.08	0.20	-1.61	0.39	-1.59	0.45	2.05	0.32	0.33	0.37	0.35	0.26	-0.31	0.30	-0.13	0.27	0.17	0.24
b2203	JW5367	gene2253	napB	5.33	1.67	0.32	0.76	-0.64	0.50	-0.91	0.92	-0.74	0.87	4.28	0.44	1.86	0.58	0.98	0.58	0.88	0.59	0.43	0.58	0.27	0.41
b2204	JW2192	gene2254	napH	9.33	2.40	-0.30	0.70	-0.88	0.39	-0.40	0.64	-0.19	0.68	4.68	0.33	2.00	0.55	1.04	0.45	0.83	0.50	0.49	0.46	0.08	0.38
b2205	JW2193	gene2255	napG	3.33	1.45	0.26	0.81	0.61	0.56	-0.78	1.14	-0.48	1.00	5.53	0.51	2.41	0.67	1.82	0.62	1.66	0.63	0.92	0.64	0.98	0.45
b2206	JW2194	gene2256	napA	44.00	16.86	-1.18	0.58	-0.04	0.33	0.16	0.38	0.88	0.62	5.95	0.28	2.98	0.55	1.92	0.27	1.73	0.37	1.47	0.45	0.56	0.38
b2207	JW2195	gene2257	napD	0.67	0.33	-0.24	0.53	0.83	1.12	0.85	1.65	1.73	1.28	6.29	0.92	3.16	1.06	1.26	1.09	1.63	0.91	1.61	0.76	0.56	0.51
b2208	JW2196	gene2258	napF	6.67	1.86	0.02	0.79	-0.80	0.52	-1.05	0.83	0.90	0.65	5.40	0.37	2.41	0.61	1.86	0.46	1.17	0.51	1.31	0.47	0.09	0.45
b2209	JW2197	gene2259	eco	210.00	31.64	-0.73	0.33	-0.11	0.12	0.84	0.14	1.05	0.22	1.62	0.16	1.50	0.25	1.79	0.15	1.75	0.17	1.30	0.14	0.70	0.19
b0228	JW0218	gene226	rayT	22.00	4.36	-1.19	0.62	-0.52	0.28	-1.11	0.48	-0.11	0.49	0.00	0.39	0.13	0.44	1.24	0.31	0.47	0.39	-0.14	0.36	-0.07	0.27
b2210	JW2198	gene2260	mqo	24.67	4.33	1.00	0.45	2.95	0.21	2.57	0.27	3.77	0.39	-1.04	0.60	-1.94	0.51	0.90	0.31	0.96	0.39	0.75	0.31	0.52	0.27
b2211	JW2199	gene2261	yojI	211.67	25.30	-0.03	0.39	1.60	0.11	1.38	0.13	0.14	0.51	-3.84	0.28	-5.49	0.44	-5.01	0.32	-4.50	0.32	-3.84	0.25	-2.18	0.30
b2212	JW2200	gene2262	alkB	43.33	8.09	0.09	0.41	-1.92	0.21	-2.69	0.46	-2.51	0.48	-2.65	0.42	-1.49	0.37	-0.78	0.30	-0.49	0.31	-0.12	0.27	-0.07	0.23
b2213	JW2201	gene2263	ada	173.67	37.71	0.44	0.32	-1.53	0.21	-2.27	0.26	-3.08	0.41	-2.15	0.28	-1.29	0.36	-0.62	0.23	0.10	0.25	0.33	0.19	0.38	0.24
b2214	JW5368	gene2264	apbE	33.33	6.33	0.53	0.42	2.51	0.18	2.08	0.25	1.15	0.49	0.96	0.30	0.35	0.37	-1.17	0.38	-1.39	0.40	-0.30	0.31	-0.26	0.24
b2215	JW2203	gene2265	ompC	26072.33	4325.93	-0.32	0.15	-0.15	0.07	1.14	0.09	0.98	0.22	1.31	0.13	1.83	0.15	1.01	0.17	0.86	0.17	0.60	0.11	0.27	0.19
b2216	JW2204	gene2267	rcsD	746.00	121.26	-0.40	0.25	0.00	0.10	-0.35	0.13	-0.35	0.20	-0.59	0.15	-0.50	0.19	-0.70	0.15	-0.75	0.17	-0.46	0.12	-0.31	0.15
b2217	JW2205	gene2268	rcsB	545.67	87.40	-0.12	0.23	0.70	0.13	0.70	0.13	0.72	0.21	0.86	0.16	0.74	0.19	0.95	0.16	0.83	0.17	0.55	0.13	0.25	0.19
b2218	JW5920; JW5917	gene2269	rcsC	394.33	54.56	-0.52	0.30	-0.39	0.09	-0.66	0.14	-0.61	0.20	-0.85	0.17	-0.88	0.19	-1.18	0.16	-0.94	0.18	-0.41	0.13	-0.26	0.16
-	-	gene227	lfhA	6.33	0.88	0.07	0.72	-1.36	0.47	-1.51	0.92	-2.52	0.98	-1.34	0.80	-0.11	0.73	1.89	0.48	1.91	0.49	0.56	0.52	0.82	0.38
b2219	JW2213	gene2270	atoS	64.00	9.29	-0.53	0.43	-2.80	0.19	-2.59	0.39	-0.45	0.48	0.03	0.27	1.54	0.24	0.65	0.22	0.19	0.25	-0.14	0.22	-0.54	0.26
b2220	JW2214	gene2271	atoC	41.00	4.16	0.07	0.54	-1.84	0.21	-1.49	0.38	-0.22	0.69	0.71	0.28	1.43	0.30	0.94	0.25	0.71	0.27	0.52	0.25	0.17	0.24
b2221	JW2215	gene2272	atoD	0.67	0.33	-0.26	0.55	-1.29	1.34	-0.85	2.03	0.72	1.52	-1.07	1.88	0.68	1.37	-0.12	1.22	-0.56	0.97	-0.42	0.74	0.09	0.49
b2222	JW2216	gene2273	atoA	0.67	0.33	-0.24	0.53	-2.33	1.51	0.12	1.79	-2.49	2.07	-2.78	2.18	-0.70	1.57	0.93	1.14	-0.51	0.97	-0.11	0.77	-0.03	0.49
b2223	JW2217	gene2274	atoE	4.00	0.58	0.62	0.75	-0.77	0.59	-0.95	1.00	-0.32	0.82	-1.53	1.00	-0.64	0.83	0.04	0.72	0.07	0.70	0.13	0.64	0.20	0.45
b2224	JW2218	gene2275	atoB	7.33	1.76	1.45	0.60	-1.25	0.44	-1.75	0.91	-1.22	0.80	-1.69	0.81	-1.45	0.75	-0.09	0.60	-0.20	0.60	0.03	0.53	0.30	0.39
b2225	JW2219	gene2276	yfaP	7.67	0.33	-0.08	0.73	-2.12	0.47	-2.48	1.01	-1.20	0.72	-2.44	0.88	-1.92	0.79	-0.10	0.56	-0.84	0.63	0.28	0.51	0.33	0.36
b2226	JW2220	gene2277	yfaQ	17.67	4.70	0.04	0.62	-1.58	0.31	-2.43	0.68	-2.09	0.62	-2.17	0.60	-1.64	0.54	-0.50	0.43	-0.62	0.49	-0.47	0.42	-0.56	0.30
-	-	gene2278	yfaS	36.00	7.23	0.04	0.48	-1.35	0.27	-1.96	0.45	-1.49	0.46	-1.25	0.38	-1.47	0.43	-0.38	0.32	-0.45	0.35	-0.27	0.31	0.01	0.25
b2229	JW2223	gene2279	yfaT	0.67	0.33	-0.26	0.55	1.17	1.08	-0.85	2.03	-0.13	1.62	0.80	1.51	-0.76	1.56	0.66	1.14	-0.56	0.97	0.46	0.80	0.15	0.49
-	-	gene228	lafU	6.00	0.58	0.33	0.70	-0.64	0.50	-0.65	0.79	-0.90	0.81	-1.86	0.89	-0.60	0.73	0.57	0.57	0.54	0.59	-0.01	0.57	0.25	0.39
b2230	JW2224	gene2280	yfaA	12.33	1.20	0.23	0.66	1.74	0.28	0.35	0.48	0.13	0.47	-0.03	0.49	0.13	0.48	0.30	0.45	-0.29	0.52	-0.71	0.48	-0.26	0.32
b2231	JW2225	gene2281	gyrA	2285.67	348.55	-0.60	0.17	0.74	0.07	1.23	0.09	0.66	0.32	0.73	0.14	0.62	0.25	-1.36	0.12	-0.84	0.18	-0.31	0.11	-0.39	0.13
b2232	JW2226	gene2282	ubiG	186.00	36.30	0.44	0.29	0.26	0.12	0.38	0.16	0.11	0.27	0.20	0.21	-0.01	0.25	-1.88	0.21	-0.42	0.27	0.15	0.16	0.01	0.18
b2233	JW2227	gene2283	yfaL	65.00	13.86	1.10	0.32	-0.63	0.19	-1.35	0.32	-1.11	0.35	-0.74	0.28	-0.70	0.32	0.10	0.23	0.28	0.29	0.20	0.22	0.32	0.21
b2234	JW2228	gene2284	nrdA	489.33	110.35	-0.25	0.32	2.72	0.16	3.16	0.14	1.95	0.42	1.84	0.18	1.90	0.29	0.08	0.16	-0.43	0.25	-1.08	0.16	0.08	0.33
b2235	JW2229	gene2285	nrdB	299.33	43.64	-0.67	0.32	2.26	0.12	2.54	0.11	1.51	0.34	1.37	0.15	1.78	0.19	0.28	0.16	-0.11	0.17	-0.21	0.14	0.00	0.15
b2236	JW2230	gene2286	yfaE	8.33	0.67	0.95	0.60	4.37	0.32	3.75	0.36	2.78	0.61	2.40	0.41	2.91	0.42	0.30	0.52	0.18	0.53	0.71	0.47	1.03	0.35
b2237	JW2231	gene2287	inaA	196.33	33.67	-0.52	0.31	-0.95	0.13	-1.80	0.21	-1.32	0.26	-2.26	0.24	-2.00	0.26	-1.60	0.20	-1.48	0.23	-1.00	0.17	-0.61	0.17
-	-	gene2288	yfaH	0.00	0.00	1.93	0.79	4.46	1.99	NA	NA	1.34	2.07	NA	NA	1.70	1.64	1.56	1.25	1.25	0.95	NA	NA	0.22	0.31
b2239	JW2233	gene2289	glpQ	178.00	15.28	-0.44	0.32	-1.68	0.14	-1.87	0.21	0.40	0.65	5.25	0.18	-0.19	0.22	-0.24	0.18	-0.84	0.23	-0.73	0.17	-0.36	0.17
b0231	JW0221	gene229	dinB	99.67	20.63	0.49	0.37	-0.64	0.14	-0.93	0.24	-1.12	0.37	-1.16	0.25	-0.27	0.25	0.17	0.20	0.05	0.22	-0.42	0.20	-0.28	0.19
b2240	JW2234	gene2290	glpT	19.67	5.84	0.90	0.52	-1.58	0.36	-0.08	0.50	3.68	0.88	8.77	0.24	2.86	0.33	1.47	0.32	0.60	0.38	0.44	0.36	0.26	0.30
b2241	JW2235	gene2291	glpA	2.00	1.15	1.84	0.80	-0.01	0.81	0.51	1.13	3.05	1.21	10.82	0.57	1.98	0.84	1.81	0.75	1.41	0.78	0.33	0.75	0.45	0.49
b2242	JW2236	gene2292	glpB	3.67	2.19	1.32	0.76	-0.31	0.63	-0.55	1.10	1.01	0.97	9.25	0.45	1.31	0.71	1.14	0.68	0.89	0.69	0.28	0.69	0.33	0.46
b2243	JW2237	gene2293	glpC	5.00	0.58	1.07	0.67	-0.89	0.51	0.05	0.79	0.19	0.81	8.87	0.39	0.54	0.66	0.80	0.59	0.85	0.58	0.52	0.57	0.06	0.41
b2244	JW2238	gene2294	yfaD	14.00	2.65	0.25	0.56	0.49	0.29	-0.15	0.51	0.24	0.45	1.23	0.39	0.43	0.43	0.77	0.41	0.68	0.40	0.68	0.38	0.54	0.31
-	-	gene2295	ypaA	21.67	4.67	0.35	0.54	-0.82	0.27	-0.31	0.42	-0.04	0.41	-0.12	0.39	0.61	0.36	-0.04	0.36	0.18	0.40	0.66	0.32	0.18	0.27
b2245	JW2239	gene2296	rhmA	5.33	3.33	0.18	0.79	-0.03	0.54	-0.47	0.90	-1.24	1.07	-0.50	0.88	-0.17	0.83	0.37	0.66	0.51	0.67	0.17	0.62	0.09	0.44
b2246	JW2240	gene2297	rhmT	6.33	0.33	0.98	0.64	-0.77	0.45	-2.16	1.01	-0.95	0.79	-1.12	0.76	-1.46	0.80	-0.29	0.64	-0.43	0.63	-0.26	0.59	-0.14	0.39
b2247	JW2241	gene2298	rhmD	70.67	15.30	0.34	0.34	-5.70	0.30	-6.36	0.94	-3.47	0.67	-2.78	0.36	-1.76	0.33	0.09	0.22	0.42	0.27	0.01	0.22	-0.22	0.24
b2248	JW2242	gene2299	rhmR	17.33	5.17	0.44	0.69	-3.98	0.43	-4.36	1.05	-2.17	0.76	-1.92	0.60	-1.32	0.58	-0.84	0.47	-0.54	0.50	-0.34	0.42	-0.55	0.33
b0024	JW5003	gene23	yaaY	17.67	0.88	-0.01	0.57	-1.82	0.31	-3.06	0.74	-2.35	0.68	-3.00	0.66	-1.19	0.53	0.52	0.36	-1.01	0.46	-0.89	0.43	-0.21	0.28
b0232	JW0222	gene230	yafN	16.33	3.18	-1.15	0.66	0.99	0.25	-0.80	0.52	-0.19	0.44	-1.31	0.63	-0.29	0.45	0.56	0.37	-0.42	0.45	-0.42	0.42	-0.36	0.32
b2249	JW2243	gene2300	yfaY	212.33	33.22	0.27	0.26	-0.21	0.10	0.21	0.15	0.12	0.25	0.26	0.17	-0.12	0.20	0.12	0.15	0.31	0.18	0.03	0.14	0.06	0.16
b2250	JW5371	gene2301	yfaZ	17.67	4.84	0.05	0.62	3.81	0.22	2.51	0.30	1.91	0.53	1.48	0.36	0.21	0.43	-1.46	0.50	-1.48	0.54	-1.46	0.48	-0.43	0.37
b2251	JW2245	gene2302	nudI	1.33	0.88	0.76	0.80	3.75	0.72	3.64	0.83	4.04	0.82	4.49	0.77	4.84	0.71	4.31	0.66	3.76	0.64	3.10	0.60	1.39	0.49
b2252	JW2246	gene2303	ais	2.00	1.15	-0.58	0.66	1.50	0.68	0.10	1.30	0.05	1.19	-2.29	1.67	-3.09	1.60	0.03	0.97	0.09	0.89	-0.24	0.79	-0.37	0.51
b2253	JW5372	gene2304	arnB	80.00	17.21	-0.89	0.48	-2.82	0.21	-3.22	0.39	-3.45	0.45	-3.12	0.37	-2.38	0.36	0.48	0.21	1.38	0.29	0.29	0.21	0.39	0.27
b2254	JW2248	gene2305	arnC	38.67	3.38	-2.25	0.58	-2.17	0.22	-2.97	0.50	-2.31	0.50	-2.30	0.43	-1.55	0.42	0.08	0.28	0.98	0.36	0.32	0.26	0.11	0.26
b2255	JW2249	gene2306	arnA	75.00	16.09	0.08	0.45	-0.47	0.15	-2.06	0.32	-2.23	0.36	-1.79	0.29	-1.06	0.34	0.27	0.21	1.29	0.31	0.57	0.21	0.42	0.21
b2256	JW2250	gene2307	arnD	20.67	2.67	0.41	0.50	-0.61	0.28	-1.93	0.56	-2.35	0.59	-2.08	0.53	-1.42	0.48	-0.05	0.37	0.98	0.36	0.36	0.34	0.48	0.25
b2257	JW2251	gene2308	arnT	53.00	11.79	-0.91	0.44	-2.26	0.22	-3.48	0.50	-2.75	0.45	-3.18	0.43	-1.67	0.35	-0.03	0.26	-0.02	0.28	-0.10	0.25	0.03	0.21
b4544	JW2252	gene2309	arnE	7.00	1.53	0.92	0.65	-2.97	0.55	-3.94	1.39	-3.88	1.28	-2.56	0.94	-1.77	0.86	-0.40	0.62	0.41	0.55	-0.24	0.58	0.42	0.37
b0233	JW0223	gene231	yafO	5.00	2.00	1.88	0.70	2.56	0.40	1.41	0.68	1.02	0.67	0.47	0.72	0.50	0.73	0.79	0.65	0.79	0.67	-0.19	0.66	0.10	0.43
b2258	JW5373	gene2310	arnF	3.33	0.33	-0.20	0.79	-0.85	0.72	-1.25	1.16	-1.64	1.12	-3.20	1.45	-1.02	1.01	0.07	0.77	0.28	0.73	-0.22	0.70	0.46	0.45
b2259	JW2254	gene2311	pmrD	19.67	4.33	-0.04	0.53	0.79	0.24	1.54	0.33	2.18	0.36	2.25	0.29	2.52	0.38	2.06	0.28	0.81	0.35	0.49	0.34	-0.38	0.29
b2260	JW2255	gene2312	menE	118.00	24.06	0.16	0.31	0.92	0.15	0.69	0.20	0.27	0.42	1.21	0.20	1.55	0.34	-0.68	0.24	0.27	0.29	0.73	0.19	0.63	0.23
b2261	JW2256	gene2313	menC	269.33	51.94	0.20	0.34	-0.31	0.17	-0.50	0.19	-1.03	0.38	0.37	0.20	1.07	0.30	-0.46	0.19	0.35	0.27	0.64	0.17	0.53	0.21
b2262	JW2257	gene2314	menB	436.33	71.19	-0.62	0.36	-0.72	0.09	-0.82	0.14	-1.05	0.28	0.17	0.16	0.96	0.29	-0.48	0.15	0.35	0.22	0.47	0.13	0.51	0.14
b2263	JW2258	gene2315	menH	19.33	4.84	-0.10	0.58	0.83	0.24	-0.47	0.47	-0.71	0.50	0.72	0.37	1.13	0.42	-0.51	0.41	0.22	0.41	0.77	0.34	1.51	0.31
b2264	JW5374	gene2316	menD	126.67	30.75	0.10	0.32	0.67	0.16	0.03	0.20	-0.74	0.40	1.38	0.24	1.28	0.39	0.04	0.21	0.82	0.23	0.84	0.17	0.67	0.21
b2265	JW2260	gene2317	menF	387.33	71.10	0.25	0.21	-0.47	0.09	-0.68	0.14	-1.19	0.29	-0.87	0.17	-0.91	0.27	-0.57	0.16	0.06	0.21	0.47	0.12	0.19	0.17
b2266	JW2261	gene2318	elaB	5545.00	854.38	-1.33	0.36	-7.75	0.11	-7.31	0.18	-6.37	0.25	-4.69	0.19	-1.85	0.27	-0.58	0.12	0.25	0.19	0.64	0.11	0.31	0.14
b2267	JW2262	gene2319	elaA	49.00	8.89	-1.25	0.51	-0.55	0.19	-2.01	0.39	-0.67	0.35	0.01	0.29	0.39	0.29	0.41	0.26	0.34	0.26	-0.01	0.25	0.19	0.20
b0234	JW0224	gene232	yafP	1.67	0.88	2.76	0.72	4.02	0.65	2.53	0.88	2.59	0.85	1.62	1.03	2.17	0.84	2.27	0.75	1.46	0.78	0.68	0.75	0.34	0.50
b2268	JW2263	gene2320	rbn	92.33	11.20	-0.22	0.37	0.22	0.14	0.47	0.20	0.11	0.30	0.21	0.22	0.05	0.29	-0.98	0.23	-0.74	0.28	-0.54	0.21	-0.29	0.21
b2269	JW5840	gene2321	elaD	10.67	2.40	-0.23	0.67	0.15	0.35	-1.09	0.66	-0.66	0.62	-0.70	0.58	-0.15	0.53	0.45	0.46	1.08	0.43	0.81	0.43	0.55	0.32
b2270	JW2265	gene2322	yfbK	3.00	2.08	1.40	0.79	1.50	0.56	0.18	1.08	1.07	0.90	0.12	1.01	0.54	0.90	1.75	0.67	1.52	0.69	0.45	0.72	0.29	0.48
b2271	JW2266	gene2323	yfbL	3.33	0.67	0.20	0.80	-0.61	0.61	-0.94	1.12	-2.84	1.39	-1.89	1.18	-1.26	0.99	0.03	0.79	-0.30	0.84	-0.84	0.74	-0.36	0.47
b2272	JW2267	gene2324	yfbM	2.67	0.88	-0.70	0.78	0.52	0.62	0.09	1.10	-0.22	1.10	2.36	0.71	3.71	0.64	1.48	0.70	1.53	0.69	1.02	0.65	0.59	0.48
b2273	JW2268	gene2325	yfbN	0.33	0.33	0.42	0.62	3.22	1.29	1.07	2.05	-1.30	2.07	2.54	1.62	1.37	1.51	1.95	1.15	0.92	0.99	0.67	0.78	0.68	0.49
b2274	JW2269	gene2326	yfbO	1.67	0.88	-0.55	0.66	1.38	0.78	1.33	1.06	1.67	1.00	1.87	0.91	0.17	1.19	0.29	0.97	0.54	0.89	0.35	0.77	-0.09	0.51
b2275	JW2270	gene2327	yfbP	4.67	1.20	0.01	0.80	1.76	0.44	0.97	0.69	1.11	0.67	1.19	0.63	1.03	0.63	0.62	0.62	0.84	0.63	-0.10	0.63	-0.10	0.43
b2276	JW2271	gene2328	nuoN	355.00	82.60	0.49	0.29	0.09	0.19	0.54	0.20	0.82	0.38	2.50	0.23	2.25	0.29	0.87	0.21	1.78	0.26	1.86	0.17	1.14	0.25
b2277	JW2272	gene2329	nuoM	230.33	43.86	0.58	0.31	0.66	0.15	0.48	0.18	1.21	0.34	2.68	0.20	2.21	0.26	1.25	0.16	1.88	0.25	1.60	0.15	1.22	0.21
-	-	gene233	ykfJ	0.33	0.33	-0.15	0.50	1.41	1.43	-0.14	2.25	-1.58	2.07	-2.00	2.23	-0.15	1.64	-0.09	1.25	-0.61	0.77	0.17	0.74	-0.41	0.27
b2278	JW2273	gene2330	nuoL	370.00	63.27	0.22	0.27	-0.36	0.11	-0.12	0.18	0.77	0.33	2.24	0.22	1.77	0.22	1.22	0.13	1.45	0.21	1.13	0.12	1.00	0.17
b2279	JW2274	gene2331	nuoK	7.67	1.76	1.40	0.61	1.29	0.35	0.17	0.65	0.89	0.52	2.69	0.53	2.03	0.53	1.80	0.43	2.19	0.42	1.47	0.44	1.77	0.36
b2280	JW2275	gene2332	nuoJ	105.67	24.01	-0.21	0.32	-0.44	0.15	-0.51	0.26	0.66	0.37	1.71	0.25	1.31	0.28	1.13	0.18	1.21	0.25	0.89	0.17	0.97	0.19
b2281	JW2276	gene2333	nuoI	131.33	30.60	0.09	0.42	-0.29	0.13	-0.88	0.24	0.59	0.37	1.50	0.29	1.06	0.31	0.87	0.18	0.92	0.23	0.46	0.18	0.56	0.20
b2282	JW2277	gene2334	nuoH	361.67	72.59	-0.18	0.28	-0.86	0.13	-0.49	0.20	0.46	0.38	1.40	0.24	1.05	0.23	1.02	0.15	0.95	0.22	0.57	0.14	0.49	0.19
b2283	JW2278	gene2335	nuoG	1380.33	284.00	-0.25	0.26	-0.97	0.13	-0.45	0.15	0.58	0.44	1.22	0.26	0.93	0.24	0.63	0.14	0.79	0.22	0.52	0.13	0.21	0.18
b2284	JW2279	gene2336	nuoF	677.00	136.86	-0.37	0.25	-0.65	0.13	-0.53	0.14	0.75	0.45	1.01	0.22	0.83	0.22	0.59	0.15	0.66	0.22	0.41	0.13	0.17	0.16
b2285	JW2280	gene2337	nuoE	265.67	55.18	-0.45	0.31	-0.57	0.13	-0.65	0.16	0.83	0.46	0.97	0.23	0.91	0.23	0.86	0.16	0.89	0.24	0.45	0.15	0.16	0.18
b2286	JW5375	gene2338	nuoC	1361.67	265.24	-0.51	0.22	-0.65	0.13	-0.27	0.13	0.86	0.45	0.78	0.20	0.68	0.19	0.23	0.14	0.49	0.21	0.35	0.12	-0.02	0.16
b2287	JW5875	gene2339	nuoB	697.67	98.03	-0.42	0.20	-0.34	0.10	-0.30	0.11	1.10	0.45	0.70	0.17	0.68	0.16	0.38	0.13	0.58	0.19	0.40	0.11	0.11	0.13
-	-	gene234	prfH	0.00	0.00	1.04	0.69	3.42	2.06	3.40	2.30	2.93	2.03	3.06	2.13	0.97	1.53	1.99	1.26	0.41	0.69	0.51	0.59	0.73	0.46
b2288	JW2283	gene2340	nuoA	415.33	73.29	0.08	0.35	0.01	0.10	-0.51	0.13	0.90	0.44	0.55	0.16	0.58	0.18	0.42	0.13	0.34	0.19	0.43	0.13	0.28	0.14
b2289	JW2284	gene2341	lrhA	125.67	4.98	-0.10	0.40	0.82	0.18	0.00	0.21	0.81	0.44	1.51	0.21	1.38	0.26	0.67	0.20	0.13	0.24	-0.23	0.20	0.13	0.31
b2290	JW2287	gene2342	alaA	84.67	11.33	1.38	0.28	3.12	0.12	2.21	0.17	2.27	0.25	1.77	0.20	1.88	0.29	0.80	0.19	0.60	0.23	0.46	0.19	0.18	0.19
b2291	JW2288	gene2343	yfbR	53.00	5.20	0.27	0.40	0.80	0.16	0.05	0.26	0.28	0.30	0.14	0.29	0.28	0.28	-0.23	0.26	-0.32	0.30	0.14	0.23	-0.07	0.21
b2292	JW2289	gene2344	yfbS	56.33	5.33	0.79	0.45	-0.90	0.18	-0.99	0.31	-0.93	0.34	0.83	0.24	1.41	0.29	1.26	0.21	0.77	0.26	0.77	0.21	0.57	0.26
-	-	gene2345	yfbT	180.33	18.10	-0.20	0.39	-1.13	0.12	-0.71	0.20	-0.04	0.33	1.02	0.18	0.92	0.23	0.68	0.16	0.83	0.19	0.73	0.15	0.52	0.16
b2294	JW2291	gene2346	yfbU	305.00	49.17	-1.05	0.26	-1.41	0.12	-0.58	0.15	0.21	0.38	0.89	0.19	0.82	0.20	0.78	0.17	0.61	0.17	0.35	0.13	-0.02	0.16
b2295	JW2292	gene2347	yfbV	486.33	57.69	-0.37	0.28	-2.23	0.12	-2.11	0.16	-2.20	0.27	-2.53	0.19	-1.65	0.21	-0.49	0.16	-0.46	0.19	-0.46	0.14	-0.15	0.17
b2296	JW2293	gene2348	ackA	3098.00	498.09	-0.99	0.22	1.39	0.11	2.17	0.11	0.89	0.54	0.43	0.15	0.70	0.38	-1.15	0.15	-1.14	0.22	-0.30	0.11	-0.53	0.20
b2297	JW2294	gene2349	pta	2047.33	296.63	-0.56	0.18	1.07	0.08	1.84	0.09	0.72	0.43	0.72	0.13	1.81	0.32	-0.89	0.13	-0.52	0.24	0.13	0.10	-0.41	0.17
b0237	JW0227	gene235	pepD	1409.33	252.05	-0.39	0.27	0.47	0.14	0.55	0.13	0.73	0.28	0.87	0.16	1.02	0.22	0.96	0.16	0.95	0.18	0.14	0.13	-0.19	0.17
b2298	JW2295	gene2350	yfcC	10.33	1.20	0.71	0.59	0.43	0.34	0.05	0.57	-0.57	0.56	5.54	0.31	5.05	0.63	1.80	0.39	1.69	0.40	1.13	0.40	0.39	0.39
b2299	JW2296	gene2351	yfcD	122.33	21.68	0.70	0.32	1.35	0.12	1.43	0.15	1.25	0.31	1.25	0.18	1.46	0.23	0.43	0.18	0.72	0.20	0.67	0.16	0.47	0.17
b2300	JW5377	gene2352	yfcE	220.00	32.62	-0.12	0.24	0.21	0.10	0.80	0.14	0.29	0.34	0.43	0.16	0.78	0.19	-0.08	0.16	0.10	0.18	0.21	0.14	0.03	0.17
b2301	JW2298	gene2353	yfcF	153.33	32.57	-0.19	0.35	-2.90	0.16	-3.56	0.31	-2.89	0.44	-2.52	0.26	-2.27	0.35	-0.91	0.19	-0.06	0.25	-0.04	0.17	0.32	0.18
b2302	JW2299	gene2354	yfcG	281.67	63.71	-0.55	0.36	-6.56	0.25	-6.38	0.51	-5.53	0.47	-4.70	0.32	-2.60	0.52	-0.48	0.18	-0.16	0.21	-0.19	0.17	0.16	0.19
b2303	JW2300	gene2355	folX	188.67	33.22	-0.62	0.36	1.16	0.17	0.87	0.18	0.87	0.28	-0.42	0.23	-0.74	0.32	-0.12	0.19	-0.02	0.23	0.06	0.18	-0.08	0.21
b2304	JW2301	gene2356	yfcH	415.00	70.15	0.05	0.24	-0.28	0.09	-0.15	0.13	-0.25	0.18	-1.00	0.18	-0.61	0.26	0.12	0.14	0.24	0.16	0.13	0.12	0.07	0.15
b2305	JW2302	gene2357	yfcI	25.00	3.06	-0.35	0.54	-0.71	0.23	-0.92	0.44	-0.54	0.41	-0.54	0.39	0.31	0.39	1.05	0.29	0.53	0.34	-0.41	0.35	-0.32	0.27
b2306	JW2303	gene2358	hisP	23.00	6.03	0.96	0.52	-0.19	0.25	-0.54	0.43	0.06	0.42	-0.79	0.43	-1.59	0.49	-0.26	0.37	-0.03	0.41	-0.70	0.40	0.20	0.33
b2307	JW2304	gene2359	hisM	33.00	4.58	-0.37	0.54	-1.63	0.22	-0.91	0.40	-0.97	0.38	-2.20	0.46	-2.49	0.48	-1.34	0.37	-1.16	0.37	-0.84	0.33	-0.52	0.31
b0238	JW0228	gene236	gpt	60.00	7.55	2.34	0.51	4.66	0.14	3.87	0.16	2.93	0.59	1.87	0.21	1.81	0.47	-0.73	0.27	-0.55	0.33	0.37	0.24	0.45	0.20
b2308	JW2305	gene2360	hisQ	82.00	18.58	-0.08	0.36	-2.31	0.18	-1.55	0.29	-1.10	0.31	-2.92	0.34	-2.83	0.41	-0.53	0.23	-0.59	0.26	-0.88	0.23	-0.21	0.28
b2309	JW2306	gene2361	hisJ	586.33	89.03	-0.56	0.32	-2.43	0.09	-1.97	0.15	-1.39	0.24	-1.95	0.16	-2.11	0.21	-0.29	0.14	-0.64	0.17	-1.23	0.13	-0.57	0.24
b2310	JW2307	gene2362	argT	1832.33	334.79	-1.32	0.35	-4.85	0.14	-4.95	0.18	-2.72	0.63	-5.81	0.22	-6.06	0.31	-0.80	0.16	-1.03	0.18	-1.66	0.13	-0.76	0.31
b2311	JW2308	gene2363	ubiX	21.67	4.26	1.84	0.57	1.73	0.22	1.81	0.30	1.57	0.33	0.70	0.34	-0.04	0.40	-1.04	0.41	-0.32	0.40	0.84	0.34	0.40	0.27
b2312	JW2309	gene2364	purF	571.00	81.00	-0.75	0.34	-1.28	0.08	-0.73	0.12	-1.68	0.48	-2.02	0.18	-1.41	0.30	-2.77	0.16	-2.17	0.19	-1.55	0.13	-0.86	0.18
b2313	JW2310	gene2365	cvpA	141.67	25.57	-0.40	0.33	0.43	0.16	0.19	0.19	-0.79	0.53	-1.19	0.24	-0.77	0.30	-2.13	0.23	-1.77	0.27	-1.13	0.20	-0.70	0.19
b2314	JW5378	gene2366	dedD	263.33	37.60	0.59	0.26	-0.04	0.11	-0.37	0.15	-0.82	0.33	-0.33	0.21	-0.49	0.19	-1.10	0.17	-0.96	0.19	-0.54	0.15	-0.38	0.21
b2315	JW2312	gene2367	folC	134.67	14.99	0.12	0.29	1.52	0.11	1.08	0.17	0.68	0.32	0.96	0.21	0.41	0.24	-1.35	0.21	-0.69	0.25	-0.20	0.18	-0.07	0.18
b2316	JW2313	gene2368	accD	593.00	101.21	0.64	0.27	1.51	0.08	1.51	0.11	1.14	0.27	1.32	0.15	0.92	0.20	-0.19	0.13	0.09	0.16	0.46	0.11	0.32	0.12
b2317	JW2314	gene2369	dedA	127.67	22.92	0.18	0.31	0.14	0.15	0.30	0.23	-0.19	0.29	-0.39	0.23	-0.77	0.26	-1.34	0.23	-1.26	0.26	-0.94	0.20	-0.55	0.20
b0239	JW0229	gene237	frsA	370.33	49.83	-0.19	0.23	-0.50	0.09	-0.89	0.14	-0.96	0.22	-0.87	0.17	-0.13	0.18	-0.35	0.15	-0.20	0.18	-0.41	0.13	-0.30	0.16
b2318	JW2315	gene2370	truA	43.33	3.71	0.33	0.39	0.50	0.18	0.13	0.28	-0.16	0.43	-0.09	0.33	-0.10	0.30	-1.65	0.33	-1.01	0.33	-0.39	0.28	0.19	0.24
b2319	JW2316	gene2371	usg	226.33	55.66	0.07	0.32	0.41	0.13	0.68	0.18	-0.14	0.41	-0.02	0.19	-0.14	0.28	-1.52	0.20	-0.89	0.22	-0.78	0.17	-0.46	0.18
b2320	JW2317	gene2372	pdxB	464.00	84.72	-0.01	0.24	-0.10	0.09	0.04	0.13	-0.27	0.24	-0.09	0.15	-0.18	0.20	-0.92	0.15	-0.51	0.18	-0.17	0.12	-0.07	0.14
b2321	JW2318	gene2373	flk	79.00	12.10	0.83	0.52	1.43	0.14	1.23	0.19	0.98	0.33	0.56	0.21	0.12	0.32	-1.31	0.25	-0.97	0.27	-0.02	0.21	-0.26	0.18
b2322	JW2319	gene2374	yfcJ	15.33	3.84	0.76	0.61	2.76	0.25	2.55	0.31	1.34	0.67	0.55	0.44	-0.72	0.58	-1.56	0.52	-1.17	0.51	-0.54	0.45	-0.29	0.31
b2323	JW2320	gene2375	fabB	2564.67	567.25	1.00	0.20	0.57	0.12	0.01	0.15	0.50	0.31	0.81	0.21	0.39	0.19	-0.34	0.15	0.20	0.17	0.05	0.12	0.24	0.20
b2324	JW5380	gene2376	mnmC	266.33	45.04	-0.33	0.27	0.38	0.10	0.04	0.14	-0.34	0.36	-0.47	0.18	0.10	0.22	-1.18	0.17	-0.75	0.18	-0.22	0.14	-0.31	0.16
b2325	JW2322	gene2377	yfcL	17.33	3.76	-0.23	0.66	2.47	0.24	2.83	0.29	2.46	0.41	2.00	0.33	1.64	0.36	0.34	0.39	0.56	0.41	0.72	0.36	0.22	0.31
b2326	JW5381	gene2378	epmC	26.33	5.24	0.48	0.52	2.28	0.20	1.56	0.31	1.34	0.34	1.32	0.30	1.18	0.31	-0.48	0.36	0.26	0.39	0.26	0.31	0.22	0.27
b2327	JW2324	gene2379	yfcA	38.67	4.91	0.17	0.43	1.54	0.18	1.46	0.24	1.39	0.30	1.12	0.26	0.94	0.27	-0.65	0.30	-0.01	0.30	0.59	0.25	0.06	0.23
-	-	gene238	crl	861.00	131.41	0.14	0.23	-1.53	0.11	-1.28	0.14	0.13	0.39	-1.60	0.16	-1.87	0.29	0.69	0.14	0.43	0.17	0.15	0.12	0.34	0.18
b2328	JW2325	gene2380	mepA	51.00	11.50	1.10	0.34	1.76	0.18	1.64	0.22	1.26	0.29	1.25	0.24	0.68	0.27	-0.51	0.28	0.01	0.29	0.80	0.23	0.51	0.23
b2329	JW2326	gene2381	aroC	241.00	47.82	0.75	0.25	0.71	0.11	0.49	0.14	0.07	0.22	0.40	0.20	0.12	0.20	-0.56	0.20	0.15	0.21	0.28	0.14	0.17	0.17
b2330	JW5841	gene2382	prmB	395.33	66.79	-0.19	0.23	0.33	0.08	0.79	0.12	0.49	0.20	0.61	0.15	0.47	0.22	-1.10	0.15	-0.53	0.20	-0.13	0.13	-0.41	0.15
b2331	JW2328	gene2383	smrB	70.67	15.34	0.54	0.45	0.71	0.15	0.42	0.22	0.43	0.31	0.61	0.23	1.13	0.25	0.78	0.20	0.50	0.24	0.39	0.21	0.26	0.18
b2332	JW2329	gene2384	yfcO	106.33	17.70	0.13	0.32	-0.51	0.14	-0.25	0.21	-0.31	0.24	-0.71	0.25	-0.23	0.23	0.80	0.18	0.30	0.21	0.28	0.18	0.08	0.18
b2333	JW2330	gene2385	yfcP	2.33	0.88	-0.97	0.75	-0.89	0.76	-2.53	1.62	-0.83	1.24	-2.01	1.35	-1.23	1.13	-1.28	1.03	-0.41	0.87	-0.54	0.77	-0.20	0.50
b2334	JW2331	gene2386	yfcQ	0.67	0.33	0.32	0.70	0.59	1.19	1.34	1.50	1.06	1.46	1.50	1.34	1.02	1.28	0.93	1.12	1.32	0.94	1.12	0.79	0.51	0.51
b2335	JW2332	gene2387	yfcR	1.67	0.67	-0.76	0.72	-0.66	0.87	-4.06	2.22	-0.82	1.32	-0.45	1.29	0.46	1.09	0.40	0.94	0.44	0.86	0.78	0.73	0.11	0.50
b2336	JW2333	gene2388	yfcS	1.00	0.58	0.39	0.75	-0.06	1.06	0.95	1.34	1.46	1.20	-0.38	1.54	-1.18	1.52	0.72	1.05	0.36	0.97	0.02	0.80	-0.13	0.50
-	-	gene2389	yfcU	26.00	4.93	0.95	0.46	-1.14	0.27	-1.63	0.48	-1.24	0.45	-1.31	0.43	-0.23	0.37	0.87	0.30	0.36	0.35	0.10	0.32	0.13	0.27
b0241	JW0231	gene239	phoE	1.00	0.58	-0.39	0.60	3.62	0.82	1.84	1.23	2.66	1.01	3.05	0.97	0.45	1.22	0.89	1.04	1.61	0.85	-0.20	0.80	0.28	0.51
b2339	JW2336	gene2390	yfcV	1.00	0.58	0.86	0.78	0.47	0.99	0.61	1.49	-1.12	1.76	-1.37	1.85	-1.01	1.53	-1.19	1.26	-0.71	0.98	-0.08	0.79	-0.38	0.49
b2340	JW2337	gene2391	sixA	862.00	134.40	-0.37	0.23	-1.65	0.11	-1.26	0.13	-1.72	0.36	-2.55	0.19	-2.82	0.24	-1.36	0.16	-1.54	0.19	-0.89	0.12	-0.41	0.16
b2341	JW2338	gene2392	fadJ	581.00	80.88	-0.62	0.26	-4.55	0.11	-5.51	0.27	-1.63	0.76	-2.89	0.17	-3.07	0.21	-0.56	0.14	-1.20	0.16	-1.66	0.13	-0.77	0.27
b2342	JW2339	gene2393	fadI	362.67	73.22	-0.12	0.27	-5.43	0.16	-5.51	0.34	-1.37	0.79	-2.83	0.22	-3.48	0.26	-0.79	0.15	-1.28	0.19	-1.96	0.16	-0.58	0.34
b2343	JW2340	gene2394	yfcZ	658.33	86.15	-1.32	0.29	-3.50	0.17	-2.46	0.15	-3.18	0.23	-0.08	0.20	1.48	0.33	0.09	0.14	-0.08	0.17	-0.12	0.15	-0.49	0.16
b2344	JW2341	gene2395	fadL	1771.67	301.67	-0.93	0.43	0.26	0.13	0.56	0.13	0.12	0.45	-0.32	0.17	-1.43	0.46	-1.25	0.17	-1.52	0.25	-2.17	0.13	-0.37	0.39
b2345	JW2342	gene2396	yfdF	4.33	1.45	-1.10	0.80	1.72	0.45	0.30	0.86	0.44	0.77	1.14	0.66	1.13	0.65	1.37	0.59	1.37	0.60	0.10	0.63	0.09	0.43
b2346	JW2343	gene2397	mlaA	305.67	45.51	0.30	0.30	0.97	0.10	1.77	0.12	1.54	0.30	1.22	0.15	0.80	0.19	0.92	0.14	0.80	0.16	0.46	0.13	0.47	0.16
b2347	JW2344	gene2398	yfdC	150.00	25.79	-0.87	0.35	-4.42	0.17	-4.88	0.43	-4.32	0.41	-3.84	0.32	-1.60	0.44	0.04	0.17	0.15	0.21	-0.21	0.17	-0.03	0.16
b0025	JW0023	gene24	ribF	627.00	114.90	0.14	0.20	0.05	0.11	0.20	0.12	0.02	0.20	-0.11	0.15	-0.33	0.18	-0.81	0.15	-0.80	0.17	-0.53	0.12	-0.45	0.15
b0242	JW0232	gene240	proB	445.33	75.83	0.67	0.25	0.38	0.13	-0.06	0.14	-0.11	0.22	0.25	0.20	-0.34	0.21	-0.81	0.17	-0.35	0.20	-0.34	0.15	-0.11	0.19
b2349	JW2345	gene2400	intS	13.00	3.21	1.36	0.55	3.94	0.25	3.84	0.29	3.99	0.40	3.64	0.32	3.11	0.37	1.06	0.40	1.10	0.41	0.32	0.42	-0.17	0.32
b2350	JW2346	gene2401	gtrA	16.00	3.06	1.45	0.56	4.27	0.24	3.96	0.26	3.67	0.39	2.43	0.32	1.48	0.44	-0.68	0.47	-0.32	0.47	0.37	0.39	0.21	0.29
b2351	JW2347	gene2402	gtrB	37.67	5.24	0.03	0.41	4.98	0.19	3.26	0.19	3.42	0.26	3.26	0.22	2.95	0.31	-0.86	0.32	-0.02	0.43	0.49	0.26	0.27	0.21
b2352	JW5382	gene2403	gtrS	16.67	4.81	-2.14	0.74	3.33	0.29	3.46	0.27	3.73	0.42	4.13	0.28	4.05	0.37	-0.29	0.43	0.50	0.51	0.93	0.35	0.23	0.34
-	-	gene2404	tfaS	11.67	1.45	1.20	0.55	0.25	0.31	0.52	0.48	0.18	0.52	-0.90	0.58	0.45	0.45	2.12	0.36	1.20	0.43	0.31	0.43	0.75	0.31
b2354	JW2350	gene2405	yfdK	5.00	1.53	-0.73	0.80	0.17	0.50	-0.11	0.81	0.42	0.70	0.38	0.70	0.21	0.68	0.93	0.62	0.18	0.66	0.48	0.59	0.08	0.43
-	-	gene2406	yfdL	0.00	0.00	NA	NA	2.85	2.12	NA	NA	1.45	2.07	NA	NA	NA	NA	1.04	1.17	1.52	0.98	0.28	0.48	0.43	0.39
-	-	gene2407	yfdM	0.00	0.00	NA	NA	0.51	2.34	NA	NA	1.40	2.07	NA	NA	NA	NA	NA	NA	NA	NA	NA	NA	0.11	0.24
b2357	JW5385	gene2408	yfdN	0.33	0.33	-0.15	0.50	-1.05	1.95	-1.92	2.50	1.04	1.74	-2.00	2.23	-1.31	1.59	-1.07	1.14	-0.61	0.77	-0.46	0.56	-0.25	0.35
-	-	gene2409	oweS	0.33	0.33	-0.09	0.49	-0.75	1.88	-1.51	2.51	0.83	1.84	-1.54	2.21	-1.00	1.52	-0.25	1.19	0.31	0.95	-0.31	0.48	-0.05	0.37
b0243	JW0233	gene241	proA	615.00	91.74	-0.14	0.34	0.03	0.09	-0.32	0.12	-0.40	0.18	0.12	0.16	-0.35	0.16	-0.85	0.13	-0.31	0.17	-0.48	0.12	-0.30	0.15
b2359	JW2356	gene2410	yfdP	1.00	1.00	1.50	0.80	1.21	0.98	0.26	1.66	-0.85	1.94	-1.24	1.94	0.68	1.52	-1.08	1.26	-0.56	0.96	-0.22	0.76	0.01	0.50
b2360	JW2357	gene2411	yfdQ	14.67	2.40	-0.47	0.61	-0.02	0.28	-0.72	0.53	-2.09	0.63	-1.05	0.52	-0.59	0.49	-1.30	0.50	-1.20	0.53	-1.02	0.47	-0.67	0.31
b2361	JW2358	gene2412	yfdR	0.33	0.33	-0.15	0.50	0.13	1.55	0.03	2.20	1.04	1.74	-2.00	2.23	-0.23	1.65	-0.26	1.25	-0.17	0.90	-0.46	0.56	-0.19	0.37
b2362	JW2359	gene2413	yfdS	0.33	0.33	-0.09	0.49	-0.11	1.67	0.06	2.37	-1.30	2.07	1.13	1.87	0.68	1.63	0.62	1.26	0.54	0.96	0.48	0.75	0.18	0.44
b2363	JW5887	gene2414	yfdT	1.00	1.00	-0.20	0.62	0.11	1.02	-3.41	2.34	-1.42	1.91	-0.55	1.59	-1.22	1.58	-1.06	1.23	0.01	0.99	-1.10	0.73	-0.54	0.47
-	-	gene2415	ypdJ	0.00	0.00	NA	NA	NA	NA	2.65	2.42	NA	NA	NA	NA	NA	NA	1.30	1.21	NA	NA	NA	NA	NA	NA
b4501	JW5387	gene2416	torI	7.67	0.88	1.51	0.55	2.01	0.34	1.40	0.53	1.28	0.50	1.08	0.50	2.19	0.43	2.74	0.39	1.26	0.50	0.90	0.48	0.56	0.38
b2364	JW2361	gene2418	dsdC	33.00	6.24	-0.36	0.52	-0.05	0.23	0.53	0.30	1.44	0.38	0.91	0.28	1.01	0.32	1.09	0.27	0.67	0.33	0.87	0.26	0.49	0.27
b2365	JW2362	gene2419	dsdX	12.33	1.20	0.04	0.62	-1.47	0.34	-2.57	0.82	1.87	0.88	2.16	0.36	-0.48	0.50	0.17	0.45	-0.20	0.49	0.37	0.41	-0.23	0.34
b2366	JW2363	gene2420	dsdA	44.33	10.11	-0.26	0.50	0.21	0.17	-0.24	0.30	1.39	0.59	2.53	0.22	1.17	0.32	0.68	0.26	0.78	0.28	0.69	0.24	0.25	0.22
b2367	JW2364	gene2421	emrY	2.00	0.58	-0.32	0.78	1.41	0.66	1.59	0.90	0.45	1.02	-0.36	1.19	-0.93	1.17	0.18	0.91	-0.20	0.89	-0.77	0.79	-0.15	0.50
b2368	JW2365	gene2422	emrK	2.67	0.33	0.16	0.80	0.29	0.61	0.96	0.89	0.62	0.86	0.11	0.94	-0.99	1.05	1.07	0.74	0.32	0.77	0.02	0.72	0.06	0.47
b2369	JW2366	gene2423	evgA	46.00	4.51	0.31	0.59	1.02	0.16	1.83	0.22	2.44	0.28	2.18	0.22	2.46	0.29	3.64	0.19	3.02	0.24	2.01	0.21	1.24	0.24
b2370	JW2367	gene2424	evgS	94.00	13.43	-2.36	0.54	-0.25	0.14	0.33	0.20	1.37	0.45	1.12	0.25	1.64	0.25	1.43	0.17	1.67	0.27	1.60	0.16	0.60	0.25
b2371	JW2368	gene2425	yfdE	7.00	1.53	0.18	0.74	-0.19	0.42	-1.45	0.85	-0.76	0.70	-1.34	0.81	-0.96	0.73	2.24	0.43	1.48	0.48	0.75	0.49	0.64	0.37
b2372	JW2369	gene2426	yfdV	3.33	1.33	-1.19	0.78	-0.47	0.69	-0.28	0.99	-0.96	1.03	-1.56	1.15	-0.97	0.98	-0.99	0.90	-0.92	0.85	-0.35	0.72	-0.61	0.48
b2373	JW2370	gene2427	oxc	4.33	0.67	-1.17	0.80	0.14	0.50	0.42	0.83	0.87	0.70	-0.73	0.86	0.08	0.72	-0.56	0.79	-0.33	0.72	-0.36	0.66	-0.33	0.44
b2374	JW2371	gene2428	frc	3.67	2.03	-0.39	0.80	0.44	0.56	0.15	1.01	0.76	0.98	1.41	0.72	0.53	0.86	-0.72	0.93	-0.46	0.88	-0.21	0.72	0.20	0.46
b2375	JW2372	gene2429	yfdX	0.33	0.33	-0.15	0.50	3.30	1.26	2.44	1.64	0.81	1.93	2.36	1.49	2.49	1.30	1.23	1.20	1.03	0.99	0.17	0.74	0.57	0.49
-	-	gene243	ykfN	0.33	0.33	-0.12	0.49	0.05	1.58	-1.65	2.51	-1.42	2.07	-1.70	2.22	-1.10	1.54	0.93	1.24	-0.07	0.88	0.22	0.73	0.07	0.43
b2376	JW2373	gene2430	ypdI	0.00	0.00	0.87	0.66	3.46	2.05	3.43	2.32	1.91	2.09	2.21	2.21	NA	NA	1.44	1.23	1.80	0.99	0.33	0.50	0.18	0.29
b2377	JW2374	gene2431	yfdY	58.67	9.24	-0.55	0.42	-2.62	0.21	-2.26	0.37	-1.28	0.33	-1.04	0.30	0.09	0.28	1.81	0.21	1.46	0.27	0.33	0.22	0.16	0.25
b2378	JW2375	gene2432	lpxP	15.33	4.33	5.22	0.54	4.20	0.26	1.79	0.36	1.44	0.44	-0.26	0.48	0.60	0.47	0.06	0.43	-0.43	0.51	-0.25	0.45	-0.64	0.34
b4680	Null	gene2433	ypdK	15.00	1.73	0.62	0.70	0.19	0.35	0.90	0.42	-0.65	0.72	-1.52	0.59	-0.47	0.57	-2.15	0.58	-2.46	0.64	-1.18	0.49	-0.41	0.37
b2379	JW2376	gene2434	alaC	94.00	14.15	1.25	0.26	-1.36	0.14	-1.42	0.25	-0.40	0.36	-0.32	0.24	-0.21	0.27	0.09	0.20	0.56	0.23	0.38	0.19	0.68	0.22
b2380	JW5388	gene2435	ypdA	90.33	9.49	0.23	0.32	0.43	0.15	0.33	0.20	-0.08	0.37	-0.31	0.23	-0.37	0.25	0.12	0.20	-0.06	0.23	0.01	0.20	-0.09	0.18
b2381	JW2378	gene2436	ypdB	122.33	18.55	-0.29	0.32	-0.98	0.13	-0.72	0.21	-0.77	0.25	-0.45	0.21	-0.44	0.25	0.51	0.18	0.49	0.20	0.04	0.18	0.06	0.16
b2382	JW2379	gene2437	ypdC	24.00	2.08	0.87	0.48	-0.60	0.27	-0.50	0.41	-0.11	0.39	0.10	0.40	0.58	0.37	0.62	0.32	0.83	0.33	0.70	0.30	0.45	0.25
b2383	JW2380	gene2438	fryA	12.00	2.08	0.92	0.68	-0.69	0.35	-0.25	0.54	-1.01	0.58	-0.73	0.56	-0.43	0.52	-0.41	0.50	0.28	0.45	0.42	0.44	0.29	0.31
b2384	JW2381	gene2439	ypdE	4.00	0.58	-0.14	0.80	-1.50	0.59	-1.87	1.19	-1.50	0.99	-1.27	1.01	-4.20	1.49	-1.61	0.91	-0.25	0.73	-0.52	0.69	0.29	0.45
b0245	JW0234	gene244	ykfI	0.67	0.67	-0.19	0.51	-0.25	1.35	0.32	1.91	-0.45	1.98	0.36	1.75	0.39	1.58	-0.08	1.26	0.02	0.98	0.37	0.79	0.45	0.50
b2385	JW2382	gene2440	ypdF	7.00	2.31	-0.57	0.75	-1.90	0.48	-2.56	1.08	-1.70	0.85	-1.17	0.77	-1.35	0.79	-1.15	0.71	-0.63	0.65	-0.26	0.58	-0.18	0.40
b2386	JW2383	gene2441	fryC	4.33	1.45	0.67	0.75	-1.63	0.66	-2.37	1.30	-2.35	1.22	-1.54	1.00	-0.35	0.83	-0.57	0.78	-0.34	0.74	-0.03	0.66	-0.02	0.43
b2387	JW5389	gene2442	fryB	1.67	0.33	0.90	0.80	-1.31	0.89	-3.98	2.23	-3.70	1.95	-4.01	2.04	-1.82	1.38	-0.81	1.09	-0.65	0.95	-1.53	0.78	-0.48	0.51
b2388	JW2385	gene2443	glk	202.00	41.07	0.90	0.24	-0.72	0.14	-1.29	0.20	0.94	0.54	1.80	0.16	1.43	0.20	-0.09	0.17	-0.12	0.20	-0.36	0.16	-0.17	0.17
b2389	JW2386	gene2444	yfeO	84.33	10.40	0.66	0.33	-2.69	0.17	-2.68	0.34	-2.73	0.39	-2.51	0.32	-1.32	0.38	-0.07	0.21	0.18	0.24	0.19	0.20	0.15	0.18
b2390	JW2387	gene2445	ypeC	30.33	3.33	1.70	0.48	-0.01	0.29	-2.74	0.54	-2.61	0.56	-2.98	0.52	-1.25	0.42	-0.45	0.33	-0.96	0.41	-0.71	0.33	0.06	0.31
b2392	JW2388	gene2446	mntH	796.33	186.82	1.62	0.45	-2.45	0.19	-3.57	0.21	-3.73	0.36	-5.28	0.27	-5.06	0.58	-1.66	0.18	-1.57	0.24	-1.78	0.17	-0.73	0.27
b2393	JW2389	gene2447	nupC	327.33	52.35	0.00	0.27	1.52	0.13	1.60	0.13	2.63	0.49	2.94	0.16	0.86	0.22	-0.55	0.18	-0.13	0.23	0.06	0.14	-0.03	0.19
b0016	Null	gene2448	insL1	6.33	1.20	-0.99	0.80	1.91	0.39	2.07	0.50	2.80	0.68	3.19	0.43	0.75	0.58	-0.31	0.63	0.17	0.59	0.38	0.53	0.09	0.40
b2395	JW5391	gene2449	yfeA	79.33	13.74	0.81	0.45	1.87	0.15	1.78	0.17	1.14	0.46	1.01	0.22	1.46	0.22	0.12	0.21	0.14	0.23	0.49	0.19	0.14	0.21
b0246	JW0235	gene245	yafW	0.00	0.00	0.45	0.53	-0.07	2.35	NA	NA	1.40	2.07	1.33	2.22	NA	NA	0.65	1.05	0.41	0.69	0.28	0.48	0.11	0.24
b2398	JW2393	gene2452	yfeC	8.67	2.40	2.65	0.63	1.23	0.36	1.35	0.53	3.03	0.61	3.58	0.40	4.38	0.42	3.36	0.36	2.16	0.45	1.03	0.47	0.47	0.41
b2399	JW2394	gene2453	yfeD	5.00	1.73	2.14	0.73	2.39	0.42	2.19	0.57	3.73	0.67	4.20	0.46	4.76	0.45	3.45	0.44	1.91	0.52	1.48	0.50	0.44	0.41
b2400	JW2395	gene2454	gltX	1277.67	211.78	-0.19	0.19	1.39	0.10	1.58	0.11	0.82	0.37	0.65	0.16	0.83	0.32	-1.29	0.13	-0.66	0.21	-0.31	0.11	-0.35	0.16
b2405	JW2396	gene2458	xapR	18.00	2.08	1.23	0.48	0.79	0.27	0.11	0.42	0.56	0.41	-0.46	0.44	0.12	0.39	1.46	0.31	1.10	0.35	0.69	0.35	0.52	0.28
b2406	JW2397	gene2459	xapB	17.00	3.00	0.75	0.49	-0.01	0.28	-0.63	0.48	-0.50	0.51	-0.21	0.46	0.46	0.39	0.53	0.37	-0.08	0.42	-0.01	0.39	0.05	0.28
b4504	JW5956	gene246	ykfH	0.00	0.00	NA	NA	-0.07	2.35	2.00	2.50	NA	NA	1.33	2.22	0.97	1.53	NA	NA	NA	NA	NA	NA	0.06	0.21
b2407	JW2398	gene2460	xapA	1.00	0.58	0.85	0.77	0.75	0.96	-1.10	1.98	1.39	1.25	0.22	1.50	-0.01	1.36	1.25	1.01	0.19	0.97	-0.08	0.79	0.60	0.51
b2408	JW2399	gene2461	yfeN	25.67	6.01	-1.03	0.60	-2.24	0.29	-3.52	0.71	-2.14	0.56	-3.67	0.66	-2.37	0.58	-0.25	0.36	-0.49	0.44	-0.26	0.36	0.30	0.28
b2409	JW2400	gene2462	yfeR	30.67	0.67	0.34	0.44	0.72	0.21	-0.06	0.34	-0.10	0.48	-0.13	0.34	-0.09	0.38	0.22	0.30	-0.03	0.34	-0.27	0.32	-0.44	0.27
b2410	JW5876	gene2463	yfeH	248.33	36.29	-0.52	0.36	-0.43	0.10	-0.46	0.15	-1.44	0.34	-1.23	0.19	-0.69	0.20	-1.25	0.18	-1.43	0.20	-1.00	0.15	-0.72	0.20
b4546	JW5877	gene2464	ypeB	26.67	4.48	-1.30	0.59	-0.03	0.22	0.40	0.37	0.21	0.49	-0.31	0.37	-0.51	0.38	-1.17	0.38	-1.31	0.42	-0.87	0.36	-0.66	0.26
b2411	JW2403	gene2465	ligA	797.67	143.66	-0.44	0.37	-0.02	0.08	-0.23	0.11	-0.89	0.40	-1.20	0.20	-1.33	0.21	-1.95	0.16	-1.62	0.17	-1.52	0.12	-0.91	0.19
b2412	JW2404	gene2466	zipA	556.00	93.56	0.66	0.21	0.77	0.09	0.57	0.11	0.42	0.20	0.45	0.18	0.37	0.22	0.67	0.14	0.86	0.16	0.62	0.12	0.64	0.19
b2413	JW2406	gene2467	cysZ	95.33	22.70	0.81	0.35	0.79	0.18	0.99	0.20	0.61	0.40	0.16	0.25	0.41	0.29	-0.34	0.24	-0.47	0.28	0.05	0.21	-0.14	0.23
b2414	JW2407	gene2468	cysK	12185.33	2022.78	-3.33	0.24	-5.50	0.08	-3.88	0.10	-3.66	0.33	-3.03	0.18	-0.84	0.27	-3.56	0.13	-0.79	0.73	-1.79	0.10	-1.90	0.13
b2415	JW2408	gene2469	ptsH	1227.67	202.45	-0.36	0.21	1.20	0.11	1.85	0.12	2.43	0.27	1.34	0.17	1.45	0.24	0.42	0.14	0.29	0.18	0.41	0.12	0.12	0.18
b0247	JW0236	gene247	ykfG	0.33	0.33	0.21	0.59	-0.51	1.73	-0.14	2.25	-1.58	2.07	0.31	1.97	0.70	1.60	0.08	1.26	0.17	0.95	0.16	0.74	0.10	0.44
b2416	JW2409	gene2470	ptsI	8476.67	1317.44	-0.95	0.27	0.11	0.09	0.49	0.10	0.81	0.26	-0.33	0.14	-0.28	0.20	-0.64	0.13	-0.51	0.17	-0.44	0.11	-0.28	0.13
b2417	JW2410	gene2471	crr	5616.67	905.30	-1.38	0.31	-0.81	0.12	-0.42	0.12	-0.25	0.23	-1.01	0.17	-0.68	0.21	-0.10	0.15	-0.09	0.17	-0.28	0.12	-0.10	0.17
b2418	JW2411	gene2472	pdxK	96.33	11.79	-0.75	0.34	0.50	0.12	1.02	0.18	1.00	0.29	1.97	0.18	2.09	0.21	1.80	0.18	1.37	0.20	0.67	0.18	-0.03	0.20
b2419	JW2412	gene2473	yfeK	17.00	3.61	0.33	0.56	-0.98	0.29	-0.17	0.45	-0.05	0.47	-0.56	0.53	-0.42	0.45	0.44	0.37	-0.53	0.44	0.39	0.38	-0.05	0.31
b2420	JW2413	gene2474	yfeS	10.00	0.58	0.39	0.66	1.59	0.34	0.98	0.48	1.42	0.46	0.58	0.52	0.80	0.48	1.86	0.39	1.40	0.43	0.76	0.43	0.22	0.33
b2421	JW2414	gene2475	cysM	446.33	83.46	-1.61	0.32	-2.20	0.09	-2.71	0.17	-2.48	0.25	-2.51	0.19	-1.16	0.20	-3.52	0.19	-3.01	0.35	-2.93	0.16	-2.47	0.19
b2422	JW2415	gene2476	cysA	1151.33	252.82	-3.18	0.32	-7.14	0.23	-5.39	0.24	-6.04	0.75	-6.08	0.55	-1.24	0.39	-5.96	0.43	-1.94	0.76	-2.19	0.17	-2.32	0.25
b2423	JW2416	gene2477	cysW	911.33	193.29	-3.59	0.34	-7.68	0.26	-5.97	0.29	-5.67	0.81	-6.75	0.35	-2.45	0.39	-6.36	0.28	-2.11	0.79	-2.91	0.18	-2.72	0.23
b2424	JW2417	gene2478	cysU	454.67	102.83	-3.17	0.41	-7.00	0.25	-4.95	0.29	-5.84	0.79	-5.88	0.35	-2.37	0.31	-6.29	0.34	-1.80	0.82	-2.95	0.19	-2.02	0.21
b2425	JW2418	gene2479	cysP	2887.33	530.49	-4.21	0.23	-8.40	0.15	-6.11	0.18	-5.85	0.96	-5.20	0.58	-2.67	0.38	-7.02	0.20	-1.22	0.87	-3.33	0.12	-2.23	0.25
b0248	JW5022	gene248	yafX	0.00	0.00	NA	NA	1.92	2.16	NA	NA	NA	NA	NA	NA	NA	NA	NA	NA	0.49	0.72	0.28	0.48	0.05	0.21
b2426	JW5394	gene2480	ucpA	143.67	35.17	1.10	0.30	-0.63	0.16	-0.15	0.21	2.16	0.60	2.87	0.21	2.93	0.24	2.54	0.17	1.83	0.22	1.17	0.17	0.41	0.28
b2427	JW2420	gene2481	murR	20.67	3.71	0.56	0.50	0.15	0.24	-0.16	0.42	0.68	0.46	-0.17	0.40	-0.01	0.43	0.55	0.34	0.50	0.36	-0.21	0.37	-0.51	0.29
b2428	JW2421	gene2482	murQ	31.00	2.52	-0.04	0.51	-0.10	0.21	0.25	0.33	2.49	0.71	1.97	0.26	2.14	0.28	1.39	0.27	1.00	0.32	0.56	0.28	0.14	0.24
b2429	JW2422	gene2483	murP	28.33	6.89	-0.91	0.56	-0.60	0.23	-0.26	0.39	1.91	0.71	1.18	0.30	1.21	0.32	0.90	0.31	0.62	0.34	0.08	0.31	0.04	0.27
b2430	JW5395	gene2484	yfeW	32.33	4.48	0.09	0.43	-0.73	0.21	-1.11	0.40	1.48	0.69	0.53	0.29	0.32	0.34	0.61	0.28	0.37	0.31	-0.17	0.30	-0.41	0.24
b2431	JW2424	gene2485	yfeX	341.67	69.02	0.02	0.25	0.25	0.12	0.57	0.14	0.06	0.30	1.67	0.17	2.04	0.30	1.09	0.15	0.81	0.18	0.52	0.15	0.25	0.17
b2432	JW2425	gene2486	yfeY	84.67	22.59	0.26	0.41	0.59	0.17	0.86	0.21	1.06	0.28	0.84	0.22	0.79	0.28	0.26	0.21	0.76	0.23	0.99	0.19	0.70	0.20
b2433	JW2426	gene2487	yfeZ	27.33	9.91	0.52	0.56	0.54	0.25	-0.03	0.41	0.07	0.46	0.01	0.40	-0.57	0.48	-0.42	0.37	0.29	0.37	0.38	0.34	0.40	0.28
b2434	JW2427	gene2488	ypeA	76.33	10.68	0.27	0.32	-0.07	0.15	-1.23	0.27	-1.02	0.34	-0.65	0.26	-1.30	0.30	-0.41	0.23	-0.26	0.28	-0.14	0.22	0.41	0.19
b2435	JW2428	gene2489	amiA	147.67	18.50	0.20	0.38	0.50	0.11	1.32	0.15	1.23	0.24	0.79	0.18	0.09	0.24	0.14	0.17	0.12	0.22	0.48	0.16	0.10	0.18
b0249	JW5023	gene249	ykfF	0.00	0.00	0.67	0.61	3.36	2.06	3.77	2.26	1.34	2.07	2.05	2.22	NA	NA	1.04	1.17	0.49	0.72	NA	NA	0.24	0.31
b2436	JW2429	gene2490	hemF	48.67	9.82	0.90	0.42	0.99	0.16	1.29	0.23	1.20	0.27	0.87	0.26	0.72	0.29	0.09	0.27	0.43	0.28	0.89	0.22	0.45	0.20
b2437	JW2430	gene2491	eutR	78.00	16.26	-0.04	0.35	-2.09	0.19	-2.31	0.35	-2.64	0.42	-2.26	0.33	-1.46	0.30	-1.05	0.25	-0.93	0.27	-0.43	0.23	-0.25	0.20
b2438	JW2431	gene2492	eutK	30.00	0.00	0.18	0.49	-1.07	0.23	-1.27	0.44	-0.91	0.42	-0.30	0.38	-0.33	0.38	-0.15	0.32	0.46	0.34	0.17	0.30	0.16	0.27
b2439	JW2432	gene2493	eutL	49.67	9.91	0.17	0.37	-1.46	0.20	-0.89	0.31	-0.96	0.33	-0.47	0.36	-0.20	0.30	-0.33	0.26	0.16	0.29	0.34	0.26	-0.03	0.20
b2440	JW2433	gene2494	eutC	49.33	12.20	0.92	0.35	-0.69	0.19	-0.65	0.32	-0.62	0.35	-0.55	0.33	-0.23	0.33	0.11	0.26	0.12	0.29	0.18	0.25	0.22	0.24
b2441	JW2434	gene2495	eutB	126.00	23.16	-0.03	0.34	-0.70	0.12	-0.67	0.20	-0.62	0.26	-0.18	0.21	-0.21	0.23	0.22	0.18	0.40	0.22	0.11	0.19	0.07	0.17
b2442	Null	gene2496	intZ	52.33	7.62	2.07	0.40	1.26	0.17	0.52	0.24	1.19	0.31	0.07	0.29	-0.21	0.28	-1.50	0.30	-1.12	0.31	-0.45	0.25	-0.32	0.22
b2443	Null	gene2497	yffL	54.67	8.69	-0.86	0.45	-0.22	0.21	-0.97	0.30	-1.21	0.32	-1.79	0.33	-1.14	0.31	-0.39	0.26	-0.83	0.33	-0.58	0.26	-0.58	0.21
b2444	Null	gene2498	yffM	2.33	0.88	-0.26	0.80	-0.93	0.75	-2.38	1.67	-2.35	1.50	-0.63	1.22	-1.54	1.26	0.28	0.89	-0.18	0.91	0.22	0.74	0.50	0.47
b2445	Null	gene2499	yffN	2.00	1.15	0.00	0.78	0.17	0.76	-2.08	1.75	-1.25	1.57	-4.07	2.04	-0.87	1.26	-0.11	0.99	0.27	0.88	-0.14	0.78	0.59	0.49
b0026	JW0024	gene25	ileS	2202.67	421.88	-0.16	0.25	0.55	0.15	0.55	0.13	0.34	0.23	0.50	0.17	0.45	0.20	-0.74	0.14	-0.57	0.17	-0.38	0.13	-0.34	0.17
b0250	JW0239	gene250	ykfB	227.00	35.02	-1.06	0.30	-3.37	0.12	-3.44	0.25	-2.57	0.33	-2.25	0.21	-1.83	0.28	-0.18	0.16	-0.93	0.24	-1.20	0.16	-0.75	0.15
b2446	Null	gene2500	yffO	9.33	1.33	-1.16	0.76	-1.63	0.42	-2.31	0.86	-2.15	0.79	-1.92	0.74	-2.68	0.83	-0.44	0.54	0.32	0.51	-0.06	0.52	0.39	0.37
b2447	Null	gene2501	yffP	26.67	2.91	-0.92	0.64	-2.71	0.30	-2.73	0.58	-2.83	0.57	-3.14	0.56	-2.19	0.49	-0.78	0.36	-0.35	0.37	-0.47	0.34	-0.01	0.29
b2448	Null	gene2502	yffQ	1.33	0.67	-0.42	0.61	0.92	0.83	-1.51	1.88	0.31	1.25	0.85	1.17	-0.32	1.30	1.75	0.88	0.89	0.89	0.07	0.80	0.68	0.50
b2449	Null	gene2503	yffR	145.00	15.59	-1.36	0.38	-3.59	0.15	-3.11	0.28	-2.61	0.31	-1.95	0.24	-1.73	0.27	0.09	0.18	-0.26	0.22	-0.44	0.19	-0.78	0.17
b2450	Null	gene2504	yffS	93.00	15.04	-0.51	0.42	-0.43	0.18	-0.68	0.23	0.67	0.36	0.36	0.22	-0.03	0.32	0.58	0.21	0.03	0.26	-0.40	0.21	-0.32	0.24
b2451	JW2435	gene2505	eutA	9.33	2.03	1.18	0.56	-2.48	0.45	-3.51	1.11	-3.56	1.07	-1.93	0.79	-1.64	0.72	-1.04	0.59	-0.35	0.55	0.35	0.47	0.16	0.37
b2452	JW2436	gene2506	eutH	42.67	5.49	-0.67	0.43	-4.69	0.30	-4.06	0.62	-3.90	0.66	-3.94	0.55	-2.86	0.46	-1.23	0.31	-1.11	0.33	-0.88	0.29	-0.84	0.24
b2453	JW2437	gene2507	eutG	4.67	1.33	1.32	0.70	-2.11	0.61	-1.98	1.14	-2.05	1.05	-1.23	0.93	-0.97	0.90	-0.19	0.73	0.27	0.66	-0.13	0.65	0.23	0.46
b2454	JW2438	gene2508	eutJ	1.67	0.33	0.71	0.80	-1.44	0.92	-3.92	2.23	-0.68	1.28	-0.54	1.30	0.14	1.11	-0.34	1.05	-0.36	0.93	0.60	0.74	0.62	0.49
b2455	JW2439	gene2509	eutE	5.00	0.58	0.63	0.72	-1.70	0.54	-1.80	1.06	-0.61	0.80	-0.53	0.79	-1.30	0.83	-0.53	0.72	-0.94	0.74	-0.29	0.64	-0.35	0.44
b0251	JW0240	gene251	yafY	7.67	1.76	-1.00	0.79	0.08	0.41	-0.31	0.69	0.94	0.58	0.33	0.60	0.08	0.60	0.89	0.51	0.38	0.58	-0.41	0.56	-0.37	0.38
b2456	JW2440	gene2510	eutN	1.00	1.00	0.67	0.73	-1.83	1.47	-2.83	2.42	-2.30	2.10	-1.24	1.94	-0.28	1.50	-0.19	1.20	-0.59	0.95	-0.46	0.74	-0.28	0.48
b2457	JW2441	gene2511	eutM	5.00	1.00	0.58	0.73	-2.86	0.63	-1.77	1.06	-1.55	0.95	-0.16	0.78	0.49	0.75	1.03	0.59	1.31	0.55	-0.03	0.61	-0.13	0.42
b2458	JW2442	gene2512	eutD	10.00	3.06	1.00	0.71	-3.11	0.49	-3.60	1.11	-2.77	0.89	-1.26	0.66	-0.61	0.59	-0.33	0.54	0.70	0.47	-0.12	0.50	-0.11	0.37
b2459	JW2443	gene2513	eutT	7.00	2.08	0.52	0.69	-2.91	0.55	-1.71	0.92	-3.14	1.14	-2.27	0.94	-0.71	0.71	-0.16	0.60	0.27	0.58	-0.45	0.59	-0.17	0.39
b2460	JW2444	gene2514	eutQ	8.33	2.96	0.46	0.70	-2.93	0.52	-4.17	1.38	-2.48	0.98	-1.44	0.75	-1.19	0.72	-0.84	0.65	0.18	0.59	-0.23	0.54	-0.66	0.40
b2461	JW2445	gene2515	eutP	4.33	1.45	-0.16	0.79	-3.15	0.72	-5.11	2.10	-1.00	1.07	-0.92	0.91	-0.15	0.78	0.91	0.64	-0.20	0.73	-0.08	0.65	-0.29	0.46
b2462	JW2446	gene2516	eutS	0.67	0.67	0.67	0.71	-1.15	1.49	-0.52	2.19	0.14	1.76	-0.06	1.84	0.02	1.61	1.19	1.12	0.84	0.98	-0.04	0.75	0.15	0.49
b2463	JW2447	gene2517	maeB	711.33	142.68	0.15	0.22	-2.73	0.10	-1.83	0.17	0.54	0.65	0.46	0.19	0.19	0.28	1.91	0.14	1.57	0.16	0.59	0.12	0.11	0.18
b2464	JW2448	gene2518	talA	7822.33	1256.99	-1.53	0.32	-9.24	0.12	-8.22	0.20	-7.49	0.31	-6.60	0.18	-4.13	0.39	-2.32	0.12	-1.26	0.22	-0.95	0.11	-0.53	0.12
b2465	JW2449	gene2519	tktB	11423.67	1961.67	-0.60	0.33	-8.94	0.11	-8.56	0.19	-7.72	0.42	-6.65	0.15	-4.05	0.38	-2.32	0.12	-0.88	0.25	-0.55	0.10	-0.04	0.12
-	-	gene252	ykfL	0.00	0.00	NA	NA	2.87	2.10	NA	NA	NA	NA	2.74	2.16	1.05	1.55	1.11	1.18	0.81	0.85	NA	NA	0.40	0.37
b2466	JW2450	gene2520	ypfG	69.33	12.88	1.01	0.50	-1.08	0.18	-4.11	0.51	-3.42	0.47	-3.52	0.41	-2.68	0.39	-2.49	0.32	-2.61	0.36	-2.26	0.31	-0.87	0.36
b2467	JW2451	gene2521	nudK	39.00	3.61	1.02	0.46	0.85	0.17	-0.18	0.30	0.27	0.32	0.53	0.28	0.71	0.28	0.70	0.29	0.18	0.29	0.25	0.26	0.21	0.23
b2468	JW2452	gene2522	aegA	26.00	4.16	0.79	0.43	-0.80	0.23	-1.16	0.43	-0.92	0.46	2.60	0.25	2.43	0.45	2.42	0.24	2.34	0.26	1.72	0.25	0.59	0.29
b2469	JW2453	gene2523	narQ	101.33	15.88	0.06	0.46	-0.74	0.15	-1.23	0.24	-1.03	0.29	-0.93	0.24	-0.58	0.24	-0.25	0.20	-0.47	0.22	-0.16	0.20	-0.32	0.19
b2470	JW2454	gene2524	acrD	55.00	15.50	0.37	0.41	0.91	0.17	0.39	0.27	0.03	0.37	0.11	0.29	-0.23	0.38	-0.72	0.29	-0.26	0.31	-0.47	0.27	-0.02	0.24
b4606	Null	gene2525	ypfM	19.00	2.65	-0.72	0.58	-0.08	0.35	-1.27	0.51	0.68	0.61	2.46	0.30	3.88	0.30	3.04	0.27	1.75	0.38	0.43	0.35	0.63	0.33
b2471	JW2455	gene2526	yffB	50.67	11.62	-0.89	0.44	1.35	0.16	1.80	0.21	2.25	0.32	1.46	0.23	1.06	0.30	2.18	0.21	1.44	0.25	0.41	0.24	-0.25	0.21
b2472	JW2456	gene2527	dapE	126.33	19.64	-0.28	0.29	1.14	0.11	1.22	0.16	1.31	0.23	0.82	0.21	0.10	0.23	0.70	0.17	0.37	0.20	-0.15	0.17	-0.15	0.17
b4547	JW2457	gene2528	ypfN	141.67	11.32	-0.74	0.36	-0.87	0.18	-1.15	0.23	-0.76	0.33	-1.56	0.26	-1.72	0.33	-0.06	0.20	-0.53	0.25	-0.45	0.23	-0.43	0.22
b2473	JW5396	gene2529	ypfH	168.67	30.22	-0.17	0.36	-1.59	0.14	-1.73	0.21	-1.59	0.26	-1.07	0.22	-0.30	0.24	-0.05	0.17	0.28	0.19	-0.13	0.16	-0.04	0.16
-	-	gene253	ykfK	0.00	0.00	NA	NA	1.06	2.35	1.60	2.51	NA	NA	1.30	2.22	NA	NA	0.65	1.05	NA	NA	NA	NA	NA	NA
b2474	JW2459	gene2530	tmcA	176.67	24.91	0.22	0.26	-0.02	0.12	0.04	0.17	-0.02	0.23	-0.11	0.19	-0.24	0.29	-0.07	0.17	0.22	0.21	0.01	0.16	0.08	0.17
b2475	JW2460	gene2531	ypfJ	567.67	93.01	-0.33	0.35	-1.58	0.08	-1.71	0.14	-1.87	0.22	-2.04	0.16	-1.55	0.33	-0.62	0.14	-0.57	0.18	-0.81	0.12	-0.35	0.13
b2476	JW2461	gene2532	purC	38.33	5.78	0.45	0.40	1.68	0.17	2.48	0.21	1.92	0.47	1.82	0.28	3.16	0.26	0.78	0.25	1.04	0.26	1.11	0.24	0.35	0.27
b2477	JW2462	gene2533	bamC	524.67	79.44	0.51	0.23	0.74	0.11	1.10	0.12	0.84	0.21	1.12	0.16	0.96	0.19	0.07	0.14	0.15	0.17	0.32	0.13	0.04	0.16
b2478	JW2463	gene2534	dapA	938.67	172.58	0.57	0.21	0.38	0.09	0.27	0.11	0.24	0.17	0.47	0.14	0.48	0.17	-0.01	0.13	-0.14	0.15	-0.08	0.11	0.03	0.14
b2479	JW2464	gene2535	gcvR	200.00	30.51	0.54	0.25	-0.96	0.12	-0.47	0.17	0.17	0.36	0.20	0.19	0.08	0.28	0.30	0.16	0.31	0.21	0.47	0.15	0.31	0.17
b2480	JW2465	gene2536	bcp	389.67	72.93	0.13	0.30	1.72	0.14	1.57	0.14	1.73	0.28	1.58	0.18	0.81	0.22	0.57	0.17	0.68	0.20	0.78	0.14	0.38	0.19
b2481	JW2466	gene2537	hyfA	0.67	0.33	1.64	0.81	1.11	1.09	-0.20	1.91	-2.57	2.07	-2.87	2.17	-0.76	1.56	-0.80	1.26	-0.19	0.99	-0.81	0.68	-0.24	0.47
b2482	JW2467	gene2538	hyfB	5.00	1.53	2.07	0.61	0.15	0.49	-0.22	0.82	0.81	0.69	-0.44	0.81	-0.17	0.76	0.05	0.69	0.59	0.61	0.47	0.58	0.48	0.40
b2483	JW2468	gene2539	hyfC	2.33	1.20	-0.67	0.69	-2.01	0.85	-2.24	1.72	-2.23	1.60	-1.29	1.43	-2.04	1.40	-0.81	1.05	-1.12	0.97	-0.57	0.80	-0.61	0.51
b0252	JW0242	gene254	yafZ	2.00	1.00	0.14	0.80	-0.66	0.80	-1.36	1.48	-1.54	1.38	-1.85	1.40	-0.18	1.05	0.33	0.88	-0.24	0.88	-0.40	0.78	-0.12	0.51
b2484	JW2469	gene2540	hyfD	2.33	0.67	0.53	0.81	-0.51	0.73	-1.18	1.34	-0.52	1.14	0.02	1.00	-0.82	1.06	-1.91	1.12	-0.18	0.85	0.50	0.70	0.23	0.48
b2485	JW2470	gene2541	hyfE	2.33	0.33	-0.04	0.80	-2.33	0.84	-1.71	1.47	-1.17	1.20	-1.02	1.21	-1.62	1.19	-0.14	0.90	-0.12	0.85	0.50	0.70	0.08	0.48
b2486	JW2471	gene2542	hyfF	13.00	4.04	0.41	0.62	-1.07	0.37	-1.71	0.68	-1.43	0.72	-2.07	0.70	-0.74	0.56	-0.38	0.48	-0.32	0.50	-0.34	0.46	0.21	0.32
b2487	JW2472	gene2543	hyfG	32.67	8.67	-0.05	0.46	-2.24	0.25	-1.85	0.46	-1.55	0.57	-1.40	0.41	-1.00	0.44	-0.30	0.33	-0.56	0.36	0.07	0.30	-0.01	0.25
b2488	JW2473	gene2544	hyfH	6.67	2.33	0.38	0.79	-1.55	0.49	-1.38	0.89	-1.88	0.90	-0.11	0.67	-0.82	0.72	-0.34	0.64	0.15	0.60	0.22	0.55	-0.04	0.40
b2489	JW5805	gene2545	hyfI	5.00	1.15	1.16	0.72	-1.42	0.60	-2.74	1.23	-1.13	1.10	-0.60	0.79	-0.17	0.76	-0.59	0.73	-0.02	0.66	0.13	0.61	0.25	0.41
b2490	JW2475	gene2546	hyfJ	3.00	0.58	-0.57	0.80	-1.48	0.69	-1.93	1.35	-1.13	1.05	-1.13	1.11	-0.42	0.90	-0.39	0.85	-0.09	0.81	-0.58	0.74	0.07	0.47
b2491	JW2476	gene2547	hyfR	13.00	2.08	-0.06	0.70	-1.22	0.35	-0.92	0.60	-0.41	0.55	-0.74	0.53	-0.72	0.52	0.19	0.45	0.12	0.45	0.54	0.40	-0.02	0.32
b2492	JW2477	gene2548	focB	9.33	3.84	0.29	0.78	-0.69	0.39	-0.83	0.73	-1.13	0.73	-1.41	0.74	-0.98	0.67	0.09	0.53	-0.45	0.60	0.09	0.50	0.11	0.37
b2493	JW2478	gene2549	yfgO	66.33	11.32	1.25	0.33	0.91	0.14	0.94	0.21	0.46	0.42	0.24	0.23	0.80	0.29	0.28	0.22	-0.01	0.25	0.32	0.21	0.11	0.22
b0253	JW0243	gene255	ykfA	65.67	11.57	0.77	0.32	-1.32	0.19	-2.07	0.34	-1.92	0.36	-2.01	0.32	-2.27	0.38	-1.44	0.28	-1.24	0.32	-1.03	0.25	-0.20	0.26
b2494	JW2479	gene2550	bepA	755.67	107.86	-0.46	0.21	-2.54	0.08	-2.46	0.14	-1.87	0.31	-1.68	0.15	-1.49	0.18	-0.86	0.13	-0.69	0.16	-0.34	0.12	-0.46	0.13
b2495	JW2480	gene2551	yfgD	110.67	14.75	-0.15	0.30	0.69	0.13	0.36	0.18	0.59	0.28	0.98	0.19	0.62	0.23	0.12	0.20	0.26	0.26	0.75	0.17	0.47	0.18
b2496	JW5397	gene2552	hda	71.67	5.78	0.95	0.34	2.26	0.16	1.37	0.19	0.66	0.38	0.24	0.24	0.95	0.28	-0.47	0.23	-0.63	0.27	-0.12	0.23	-0.21	0.23
b2497	JW2482	gene2553	uraA	9.33	1.86	0.47	0.62	6.39	0.30	6.23	0.30	4.69	0.65	4.07	0.35	4.41	0.56	0.87	0.47	1.03	0.45	0.99	0.43	0.30	0.38
b2498	JW2483	gene2554	upp	49.67	10.81	1.78	0.64	4.90	0.19	5.10	0.17	3.98	0.65	3.59	0.22	4.17	0.41	2.25	0.21	2.31	0.25	2.24	0.20	1.59	0.32
b2499	JW2484	gene2555	purM	30.00	6.93	0.64	0.48	2.01	0.19	2.61	0.24	1.63	0.63	1.32	0.33	1.70	0.38	-0.37	0.33	0.21	0.33	0.69	0.28	0.35	0.25
b2500	JW2485	gene2556	purN	44.00	6.56	0.61	0.40	1.73	0.16	2.03	0.21	1.34	0.33	0.96	0.25	0.93	0.31	-0.21	0.27	-0.02	0.29	0.60	0.24	-0.01	0.23
b2501	JW2486	gene2557	ppk	2009.00	375.03	-1.30	0.21	-2.18	0.11	-2.24	0.13	-1.91	0.24	-2.07	0.17	-1.50	0.19	-1.25	0.14	-1.12	0.17	-0.88	0.12	-0.78	0.16
b2502	JW2487	gene2558	ppx	904.00	120.40	-0.85	0.27	-1.59	0.09	-1.59	0.13	-1.29	0.27	-1.14	0.16	-1.13	0.17	-1.24	0.14	-0.89	0.18	-0.68	0.12	-0.54	0.15
b2503	JW2488	gene2559	yfgF	17.33	3.76	-0.46	0.60	-0.23	0.28	0.05	0.45	-0.86	0.53	0.92	0.41	0.84	0.54	-0.33	0.42	-0.38	0.45	-0.01	0.39	-0.52	0.31
b0254	JW0244	gene256	perR	5.67	0.88	1.08	0.68	2.08	0.39	1.17	0.62	1.14	0.58	0.60	0.63	0.41	0.62	0.40	0.61	0.45	0.58	0.40	0.55	0.13	0.40
b2504	JW5399	gene2560	yfgG	74.00	7.77	1.80	0.29	0.46	0.17	0.43	0.22	0.86	0.35	0.42	0.23	0.67	0.23	0.04	0.23	0.24	0.24	0.08	0.23	-0.24	0.21
b2505	JW5400	gene2561	yfgH	1.67	1.20	0.95	0.80	1.89	0.73	1.28	1.12	0.84	1.30	1.29	1.04	0.66	1.21	-0.29	1.08	0.40	0.91	-0.26	0.80	-0.38	0.51
b2506	JW2490	gene2562	yfgI	6.33	1.86	0.22	0.75	-0.13	0.44	-0.71	0.85	-0.52	0.70	-0.82	0.78	0.22	0.63	0.97	0.53	0.32	0.62	0.13	0.56	0.09	0.41
b2507	JW2491	gene2563	guaA	1279.67	270.96	-0.70	0.24	1.49	0.12	2.04	0.12	1.06	0.52	0.09	0.17	1.09	0.30	-2.14	0.15	-1.54	0.24	-0.63	0.12	-0.67	0.18
b2508	JW5401	gene2564	guaB	985.33	188.94	-0.51	0.22	1.21	0.10	1.60	0.11	0.39	0.80	-1.36	0.17	0.38	0.36	-4.82	0.18	-2.93	0.30	-1.41	0.12	-0.73	0.15
b2509	JW2493	gene2565	xseA	242.67	26.03	1.58	0.35	1.21	0.11	1.30	0.13	0.36	0.55	-1.26	0.20	-2.15	0.35	-2.87	0.21	-1.51	0.28	-0.54	0.15	-0.56	0.17
b2510	JW5402	gene2566	yfgJ	102.00	11.06	-0.42	0.36	0.06	0.15	-0.41	0.22	-0.96	0.33	-1.79	0.26	-1.16	0.29	-1.61	0.25	-1.64	0.27	-1.35	0.23	-0.80	0.20
b2511	JW5403	gene2567	der	2140.67	361.39	-0.63	0.34	-0.36	0.08	-0.41	0.10	-1.29	0.40	-1.91	0.16	-2.09	0.26	-2.64	0.12	-2.12	0.16	-1.79	0.11	-1.10	0.19
b2512	JW2496	gene2568	bamB	2150.33	275.64	-1.07	0.29	-0.86	0.07	-0.82	0.10	-1.26	0.23	-1.22	0.14	-1.31	0.17	-1.62	0.12	-1.49	0.16	-1.01	0.11	-0.74	0.17
b2513	JW2497	gene2569	yfgM	430.00	63.97	-0.70	0.23	0.36	0.08	0.02	0.13	-0.34	0.24	-0.28	0.16	-0.54	0.22	-1.19	0.15	-1.08	0.18	-0.76	0.13	-0.46	0.13
-	-	gene257	insN	49.33	4.91	0.35	0.36	-0.44	0.18	-0.38	0.28	-0.15	0.31	-0.58	0.32	-0.34	0.34	0.92	0.23	0.75	0.28	0.21	0.24	0.22	0.22
b2514	JW2498	gene2570	hisS	1094.33	181.93	0.02	0.20	0.28	0.11	0.38	0.12	-0.16	0.26	-0.18	0.15	-0.45	0.20	-1.23	0.14	-0.88	0.20	-0.63	0.12	-0.41	0.15
b2515	JW2499	gene2571	ispG	1332.00	248.66	-0.45	0.25	-0.50	0.11	-0.62	0.12	-0.97	0.22	-1.02	0.16	-1.04	0.19	-1.28	0.14	-0.88	0.17	-0.60	0.13	-0.36	0.16
b2516	JW2500	gene2572	rodZ	1099.67	176.15	-0.06	0.18	-0.50	0.09	-0.42	0.11	-0.68	0.20	-0.97	0.14	-0.69	0.21	-0.49	0.13	-0.51	0.15	-0.57	0.11	-0.47	0.13
b2517	JW2501	gene2573	rlmN	649.33	101.07	-0.06	0.23	1.37	0.07	1.08	0.10	0.26	0.42	-0.75	0.19	-1.05	0.33	-3.03	0.16	-2.31	0.28	-1.49	0.13	-0.81	0.19
b2518	JW2502	gene2574	ndk	154.67	30.11	1.17	0.38	2.66	0.11	2.02	0.14	2.93	0.35	0.55	0.29	-0.46	0.22	-0.24	0.18	0.19	0.26	0.38	0.16	0.32	0.19
b2519	JW2503	gene2575	pbpC	24.67	1.76	1.08	0.44	0.57	0.22	0.68	0.33	0.48	0.36	0.77	0.33	1.23	0.35	0.60	0.32	1.00	0.33	0.90	0.29	0.47	0.25
b2520	JW2504	gene2576	yfhM	877.00	156.72	-0.27	0.20	-1.03	0.09	-1.15	0.12	-0.87	0.22	-0.67	0.15	-0.04	0.17	0.73	0.13	0.52	0.15	0.20	0.11	-0.07	0.17
b2521	JW2505	gene2577	sseA	969.00	184.30	-0.92	0.32	-2.83	0.12	-2.45	0.14	-1.81	0.27	-1.33	0.16	-0.44	0.20	0.04	0.15	0.05	0.17	-0.21	0.13	-0.18	0.17
b2522	JW5404	gene2579	sseB	116.00	22.37	-0.07	0.38	2.45	0.12	2.21	0.16	1.59	0.28	0.75	0.19	1.31	0.22	-0.23	0.22	-0.55	0.22	-0.22	0.18	-0.24	0.20
b0256	Null	gene258	insI1	36.67	7.97	0.00	0.45	0.34	0.21	-0.50	0.35	0.09	0.43	-0.30	0.35	0.06	0.34	1.01	0.26	0.41	0.32	-0.02	0.29	-0.35	0.26
b2523	JW2507	gene2580	pepB	214.33	54.14	0.69	0.32	1.75	0.13	1.17	0.16	0.68	0.39	0.61	0.23	1.30	0.22	0.56	0.18	0.34	0.20	0.11	0.17	0.54	0.19
b2524	JW2508	gene2581	iscX	44.67	7.31	-0.30	0.46	3.22	0.15	2.90	0.19	2.42	0.33	1.15	0.26	1.37	0.25	-0.09	0.27	-0.50	0.31	-0.03	0.26	-0.13	0.23
b2525	JW2509	gene2582	fdx	53.33	10.74	0.76	0.56	3.44	0.14	3.20	0.18	2.58	0.33	1.38	0.24	1.48	0.25	-0.42	0.26	-0.44	0.31	0.05	0.25	0.10	0.21
b2526	JW2510	gene2583	hscA	253.33	54.35	1.42	0.37	2.67	0.15	2.32	0.15	1.61	0.35	1.05	0.29	0.95	0.23	-0.92	0.19	-0.47	0.21	-0.01	0.17	-0.02	0.23
b2527	JW2511	gene2584	hscB	86.67	11.98	0.59	0.52	2.74	0.14	2.78	0.15	2.02	0.37	-0.17	0.24	0.23	0.24	-2.55	0.30	-1.81	0.28	-0.74	0.22	-0.70	0.18
b2528	JW2512	gene2585	iscA	359.00	62.31	0.54	0.44	1.91	0.10	1.66	0.12	1.19	0.27	-1.11	0.18	-0.23	0.19	-1.57	0.16	-1.60	0.20	-1.01	0.14	-0.64	0.15
b2529	JW2513	gene2586	iscU	338.00	58.53	0.41	0.48	2.12	0.12	1.87	0.13	1.37	0.31	-0.87	0.19	-0.04	0.20	-1.97	0.19	-1.93	0.22	-0.99	0.18	-0.58	0.18
b2530	JW2514	gene2587	iscS	807.33	114.23	0.82	0.41	2.40	0.08	2.68	0.09	1.98	0.26	-0.41	0.19	0.36	0.17	-2.57	0.14	-1.99	0.17	-0.52	0.14	-0.35	0.18
b2531	JW2515	gene2588	iscR	218.00	37.36	2.46	0.21	2.37	0.12	2.65	0.13	2.09	0.27	-1.55	0.20	-0.76	0.22	-2.47	0.21	-2.03	0.23	-0.55	0.18	-0.13	0.24
b2532	JW2516	gene2589	trmJ	367.00	56.40	0.46	0.28	0.59	0.08	1.14	0.11	0.64	0.40	0.20	0.18	0.35	0.18	-0.15	0.14	-0.60	0.21	-0.24	0.13	-0.69	0.15
b2533	JW2517	gene2590	suhB	40.00	4.58	3.11	0.59	6.03	0.16	5.83	0.17	4.46	0.78	2.00	0.24	2.10	0.41	0.19	0.29	-0.56	0.33	0.93	0.24	0.40	0.23
b2534	JW2518	gene2591	yfhR	2.33	0.88	0.40	0.80	4.01	0.58	2.32	0.76	1.51	0.94	-0.18	1.06	-0.15	0.99	-0.67	0.95	-0.80	0.92	-0.10	0.74	0.03	0.49
b2535	JW5878	gene2592	csiE	6793.33	967.66	-1.22	0.23	-8.56	0.11	-8.21	0.20	-3.89	0.75	-3.62	0.15	-2.58	0.29	-1.14	0.11	-1.11	0.16	-0.71	0.10	-0.71	0.19
b2536	JW2520	gene2593	hcaT	26.67	8.17	1.02	0.52	1.94	0.22	1.47	0.30	1.08	0.38	0.24	0.37	0.01	0.42	-0.26	0.36	-0.16	0.38	0.18	0.32	0.25	0.26
b2537	JW2521	gene2594	hcaR	421.33	88.71	-0.95	0.43	-5.38	0.20	-5.65	0.35	-0.33	0.90	-3.79	0.25	-4.06	0.31	-0.40	0.17	-0.65	0.22	-1.02	0.17	-0.55	0.28
b4706	Null	gene2595	iroK	0.00	0.00	NA	NA	NA	NA	NA	NA	NA	NA	NA	NA	NA	NA	NA	NA	NA	NA	NA	NA	NA	NA
b2538	JW2522	gene2596	hcaE	81.67	16.33	0.66	0.35	-1.96	0.16	-2.39	0.33	-1.39	0.36	-2.10	0.30	-1.61	0.30	-0.75	0.23	-0.72	0.26	-0.40	0.22	-0.18	0.20
b2539	JW2523	gene2597	hcaF	9.33	2.19	0.57	0.68	-1.06	0.39	-1.67	0.78	-0.54	0.60	-2.68	0.87	-0.95	0.68	-0.45	0.55	-0.17	0.54	-0.63	0.54	0.16	0.36
b2540	JW2524	gene2598	hcaC	1.00	1.00	0.18	0.64	0.56	1.03	-0.32	1.87	0.82	1.58	0.72	1.54	1.12	1.23	1.16	1.04	1.11	0.93	1.20	0.77	1.04	0.51
b2541	JW2525	gene2599	hcaB	12.00	1.73	0.34	0.57	-0.88	0.34	-1.25	0.65	-0.66	0.56	-1.14	0.57	-0.82	0.54	-0.46	0.48	0.16	0.47	0.00	0.44	0.38	0.35
b0027	JW0025	gene26	lspA	148.67	29.87	0.14	0.31	1.22	0.15	1.00	0.18	0.86	0.27	0.52	0.21	0.56	0.25	-0.48	0.21	-0.60	0.24	-0.15	0.19	-0.11	0.23
-	-	gene260	ykfC	75.33	14.15	-0.70	0.38	-1.38	0.15	-1.11	0.27	-1.13	0.35	-0.67	0.25	-0.87	0.27	-0.01	0.22	-0.11	0.27	-0.43	0.22	-0.39	0.22
b2542	JW2526	gene2600	hcaD	23.67	4.63	0.35	0.50	-1.14	0.26	-1.58	0.49	-1.23	0.47	-0.96	0.42	-1.08	0.45	-0.59	0.37	-0.25	0.42	-0.03	0.34	0.17	0.26
b2543	JW2527	gene2601	yphA	172.67	26.36	-0.81	0.41	-4.37	0.18	-4.22	0.34	-3.94	0.50	-3.22	0.27	-1.41	0.31	0.71	0.17	0.81	0.20	0.32	0.16	0.74	0.16
b2544	JW2528	gene2602	yphB	24.67	3.18	0.69	0.48	-1.16	0.25	-2.13	0.53	-1.51	0.47	-1.20	0.43	-0.99	0.41	-0.66	0.37	-0.53	0.38	-0.08	0.34	0.17	0.25
b2545	JW5842	gene2603	yphC	26.00	6.43	0.92	0.49	-1.32	0.26	-1.76	0.50	-1.87	0.54	-0.79	0.41	-0.85	0.44	-0.22	0.35	0.10	0.40	-0.12	0.35	0.11	0.27
b2546	JW2530	gene2604	yphD	4.33	1.67	0.88	0.73	-0.66	0.56	-1.92	1.21	-0.64	0.89	-1.27	0.99	-0.14	0.80	-0.05	0.74	0.08	0.72	-0.02	0.67	0.26	0.45
b2547	JW2531	gene2605	yphE	12.00	2.65	0.90	0.61	-1.93	0.38	-1.41	0.67	-1.37	0.66	-1.57	0.65	-0.77	0.55	-0.28	0.50	0.27	0.46	-0.36	0.48	-0.40	0.34
b2548	JW2532	gene2606	yphF	15.33	2.91	-0.04	0.59	-2.01	0.34	-3.01	0.79	-3.10	0.77	-1.62	0.56	-0.63	0.49	0.57	0.38	0.07	0.42	-0.21	0.41	-0.54	0.32
b2549	JW5405	gene2607	yphG	29.67	1.33	0.69	0.47	-1.88	0.25	-1.43	0.43	-1.17	0.46	-1.27	0.40	-1.16	0.43	-0.50	0.34	-0.48	0.40	-0.11	0.32	-0.16	0.27
b2550	JW5406	gene2608	yphH	58.67	8.69	0.15	0.54	-0.93	0.19	-0.99	0.31	-0.67	0.35	-0.96	0.29	-0.65	0.34	-0.06	0.24	0.01	0.26	0.12	0.23	0.04	0.20
b2551	JW2535	gene2609	glyA	1593.67	298.23	-0.24	0.18	0.10	0.09	0.59	0.10	0.73	0.21	1.09	0.13	1.65	0.18	-0.10	0.16	-0.02	0.20	0.27	0.10	-0.35	0.17
b0259	Null	gene261	insH1	4.33	1.20	-1.41	0.79	-1.06	0.58	-0.98	0.99	-0.88	0.94	-1.87	1.05	-0.30	0.88	-0.89	0.81	-0.25	0.72	-0.83	0.70	-0.87	0.47
b2552	JW2536	gene2610	hmp	47.00	11.14	-0.17	0.41	0.11	0.17	1.01	0.25	1.95	0.42	1.77	0.24	1.68	0.33	2.01	0.21	2.16	0.23	1.69	0.21	1.03	0.23
b2553	JW2537	gene2611	glnB	102.33	14.34	0.67	0.36	0.84	0.14	0.94	0.18	0.80	0.30	0.81	0.21	1.31	0.23	0.64	0.19	0.35	0.24	0.38	0.19	0.21	0.20
b2554	JW2538	gene2612	glrR	87.67	13.91	0.00	0.42	0.13	0.15	-0.15	0.23	-0.23	0.32	0.23	0.24	-0.05	0.27	-0.80	0.23	-0.23	0.24	-0.03	0.20	0.07	0.18
b2555	JW2539	gene2613	yfhG	121.67	17.49	0.04	0.31	-0.78	0.13	-0.31	0.20	-0.37	0.26	-0.51	0.22	-0.62	0.23	-0.66	0.20	-0.48	0.23	-0.45	0.19	-0.49	0.18
b2556	JW5407	gene2614	glrK	192.67	31.83	0.17	0.27	-1.01	0.11	-1.13	0.18	-1.05	0.23	-1.25	0.19	-0.82	0.23	-0.51	0.17	-0.72	0.22	-0.48	0.16	-0.31	0.15
b2557	JW2541	gene2616	purL	98.67	24.46	0.57	0.30	1.71	0.14	2.37	0.16	1.20	0.64	1.14	0.22	1.98	0.31	-0.20	0.21	0.08	0.25	0.61	0.22	0.27	0.20
b2558	JW2542	gene2617	mltF	47.33	5.46	0.73	0.51	1.74	0.16	1.50	0.22	0.67	0.54	-0.52	0.30	-0.97	0.41	-1.66	0.33	-1.38	0.34	-0.88	0.29	-0.73	0.23
b2559	JW2543	gene2618	tadA	28.33	8.45	1.39	0.46	3.36	0.19	2.22	0.26	1.31	0.64	0.11	0.35	0.55	0.38	0.70	0.35	0.63	0.33	0.66	0.29	0.78	0.25
b2560	JW5408	gene2619	pgpC	274.33	37.05	-0.45	0.26	-2.32	0.12	-1.59	0.17	-1.85	0.22	-1.62	0.19	-0.63	0.22	-0.27	0.15	-0.44	0.18	-0.34	0.14	-0.07	0.16
b0260	JW5027	gene262	mmuP	23.67	7.84	-0.23	0.55	-1.28	0.27	-0.94	0.46	-0.83	0.54	-1.48	0.48	-1.27	0.48	0.21	0.35	0.69	0.36	0.18	0.34	0.19	0.27
b2561	JW2545	gene2620	yfhH	19.33	4.63	1.77	0.47	2.34	0.23	2.28	0.30	1.74	0.47	1.92	0.31	2.92	0.29	0.40	0.36	1.25	0.34	1.18	0.31	0.93	0.30
b2562	JW2546	gene2621	yfhL	1.67	0.33	3.04	0.76	5.84	0.63	4.78	0.69	4.03	0.91	2.06	0.89	2.80	0.81	0.09	0.98	0.80	0.83	0.96	0.72	0.39	0.50
b4687	Null	gene2622	shoB	10.00	1.53	-2.34	0.80	0.73	0.41	1.03	0.47	0.77	0.48	0.55	0.48	0.78	0.50	1.21	0.42	0.46	0.51	-0.53	0.51	-1.18	0.38
b2563	JW2547	gene2624	acpS	24.00	1.53	-0.18	0.52	1.23	0.21	1.50	0.32	1.36	0.36	1.44	0.32	1.67	0.32	1.49	0.29	1.31	0.33	0.99	0.29	0.69	0.27
b2564	JW2548	gene2625	pdxJ	96.00	15.53	0.64	0.30	0.96	0.12	0.76	0.19	0.67	0.23	1.27	0.24	1.57	0.23	1.39	0.18	1.66	0.19	1.16	0.17	0.65	0.18
b2565	JW2549	gene2626	recO	61.33	12.25	0.01	0.42	1.93	0.17	1.44	0.22	0.89	0.42	0.48	0.26	1.30	0.31	-0.71	0.27	-0.12	0.29	0.14	0.23	-0.15	0.23
b2566	JW2550	gene2627	era	422.00	76.43	-0.53	0.28	1.85	0.09	1.40	0.12	0.64	0.40	0.30	0.17	0.25	0.32	-0.94	0.15	-0.59	0.18	-0.40	0.14	-0.39	0.14
b2567	JW2551	gene2628	rnc	259.67	31.42	0.23	0.36	2.55	0.10	1.66	0.14	1.06	0.42	0.19	0.17	-0.15	0.29	-0.54	0.17	-0.63	0.19	-0.55	0.15	-0.32	0.17
b2568	JW2552	gene2629	lepB	682.67	104.94	-0.94	0.23	1.30	0.11	0.74	0.12	0.02	0.35	-0.34	0.17	-0.58	0.24	-2.04	0.16	-1.77	0.20	-0.89	0.13	-0.57	0.17
b0261	JW0253	gene263	mmuM	31.00	6.24	1.48	0.37	-1.24	0.23	-1.67	0.45	-0.49	0.43	0.35	0.36	0.86	0.36	0.40	0.30	0.85	0.31	0.84	0.27	0.94	0.27
b2569	JW2553	gene2630	lepA	1427.33	249.34	-0.25	0.21	1.20	0.08	1.07	0.10	0.33	0.31	0.08	0.15	-0.32	0.31	-1.77	0.13	-1.24	0.18	-0.66	0.11	-0.54	0.12
b2570	JW2554	gene2631	rseC	100.67	18.98	0.88	0.32	0.38	0.12	0.30	0.19	-0.20	0.26	-0.86	0.24	-1.26	0.26	-1.45	0.26	-0.98	0.30	-0.10	0.20	-0.41	0.20
b2571	JW2555	gene2632	rseB	1122.00	186.71	0.44	0.20	-1.17	0.10	-0.97	0.12	-0.93	0.21	-1.45	0.18	-1.58	0.17	-0.58	0.13	-0.57	0.19	-0.04	0.11	-0.58	0.19
b2572	JW2556	gene2633	rseA	3058.00	478.20	-0.30	0.16	-3.23	0.07	-2.32	0.10	-2.12	0.17	-2.13	0.15	-1.78	0.14	0.17	0.14	0.12	0.14	0.31	0.10	-0.09	0.14
b2573	JW2557	gene2634	rpoE	2546.33	417.07	-0.42	0.21	-2.42	0.13	-2.47	0.13	-2.14	0.24	-2.46	0.19	-2.03	0.20	-0.14	0.14	-0.54	0.18	-0.15	0.13	-0.05	0.17
b2574	JW2558	gene2635	nadB	11.33	2.60	1.03	0.57	0.45	0.34	0.63	0.48	0.72	0.50	0.98	0.45	0.55	0.49	1.36	0.39	0.82	0.43	1.03	0.41	0.65	0.32
b2575	JW2559	gene2636	trmN	25.67	5.17	1.47	0.60	2.22	0.21	1.33	0.30	1.20	0.35	0.27	0.34	-0.43	0.39	-1.01	0.38	-0.77	0.39	0.25	0.32	0.05	0.29
b2576	JW2560	gene2637	srmB	451.33	85.11	-0.01	0.26	1.52	0.09	1.34	0.11	0.36	0.46	0.05	0.18	-0.32	0.22	-0.63	0.14	-0.42	0.19	0.06	0.13	0.05	0.15
b2577	JW2561	gene2638	yfiE	16.33	2.03	1.56	0.52	1.95	0.24	0.37	0.43	0.69	0.41	0.03	0.42	0.28	0.42	0.74	0.37	0.17	0.41	-0.19	0.41	-0.21	0.31
b2578	JW2562	gene2639	eamB	20.67	2.03	-0.25	0.56	-1.37	0.29	-1.98	0.55	-1.78	0.52	-1.85	0.51	-1.88	0.53	-0.60	0.42	-0.32	0.39	0.17	0.34	0.24	0.26
b0262	JW0254	gene264	afuC	2.67	0.88	0.27	0.81	1.46	0.58	1.11	0.88	0.47	0.94	0.51	0.91	1.08	0.80	0.63	0.82	0.17	0.82	0.76	0.68	0.74	0.45
b2579	JW2563	gene2640	grcA	3557.00	449.43	-0.56	0.75	-6.10	0.11	-5.41	0.14	-5.61	0.45	0.39	0.16	3.20	0.20	1.25	0.14	0.60	0.19	0.31	0.12	-0.34	0.19
b2580	JW2564	gene2641	ung	99.67	8.19	-0.29	0.32	-0.13	0.14	0.59	0.19	0.64	0.29	1.18	0.20	1.37	0.22	0.52	0.19	0.50	0.23	0.38	0.18	0.00	0.19
b2581	JW2565	gene2642	yfiF	272.00	47.25	0.85	0.32	2.00	0.10	1.08	0.13	0.45	0.46	0.10	0.22	-0.06	0.25	-0.45	0.16	-0.15	0.18	-0.40	0.15	0.07	0.20
b2582	JW2566	gene2643	trxC	232.00	33.65	2.75	0.46	0.54	0.15	-1.33	0.19	-1.13	0.24	-3.29	0.25	-2.53	0.28	-0.21	0.17	-0.62	0.24	-0.90	0.17	-0.32	0.19
b2583	JW5409	gene2644	yfiP	24.33	6.33	2.19	0.56	2.96	0.20	2.17	0.27	1.53	0.44	0.93	0.33	0.73	0.37	-1.80	0.45	-0.79	0.51	-0.19	0.35	-0.60	0.31
b2584	JW2568	gene2645	pka	1658.67	250.12	-0.48	0.18	-3.61	0.09	-3.82	0.14	-2.71	0.49	-1.80	0.15	-0.30	0.17	-0.56	0.12	-0.67	0.17	-0.32	0.11	-0.36	0.16
b2585	JW2569	gene2646	pssA	1669.00	253.20	-0.74	0.21	-0.61	0.09	-0.13	0.10	-0.50	0.25	-0.65	0.14	-0.88	0.21	-0.89	0.13	-0.48	0.18	-0.31	0.10	-0.29	0.14
b2586	JW2570	gene2647	yfiM	13.00	4.04	-0.16	0.67	-0.38	0.33	-0.37	0.57	-0.28	0.54	-0.39	0.52	0.74	0.54	-0.29	0.51	0.26	0.46	0.08	0.44	-0.15	0.33
b2587	JW2571	gene2648	kgtP	3173.33	504.76	-0.19	0.26	-0.85	0.13	-0.85	0.12	-0.24	0.25	-3.19	0.17	-3.16	0.31	-0.55	0.15	-1.12	0.18	-1.62	0.15	-0.74	0.27
-	-	gene265	afuB	1.00	1.00	0.28	0.66	1.39	0.94	-0.15	1.82	0.23	1.67	-2.88	2.19	-0.92	1.61	-1.69	1.24	-0.28	0.97	0.04	0.56	0.04	0.50
b2592	JW2573	gene2653	clpB	10191.00	1741.14	-1.00	0.19	-3.87	0.15	-3.24	0.10	-1.27	0.67	-1.74	0.20	-2.46	0.29	-2.35	0.12	-1.33	0.15	0.00	0.11	-0.05	0.18
b2593	JW2575	gene2655	yfiH	195.33	29.73	0.42	0.31	0.85	0.10	0.40	0.15	-0.22	0.32	-0.90	0.19	-0.80	0.23	-1.18	0.18	-0.27	0.19	-0.21	0.15	0.18	0.20
b2594	JW2576	gene2656	rluD	693.00	128.31	-0.05	0.26	0.01	0.10	-0.10	0.12	-0.77	0.36	-1.34	0.15	-1.09	0.18	-0.96	0.14	-0.56	0.18	-0.44	0.12	-0.06	0.20
b2595	JW2577	gene2657	bamD	386.33	57.74	0.64	0.28	1.34	0.08	2.00	0.11	2.10	0.19	2.04	0.14	1.95	0.19	0.76	0.13	0.90	0.18	1.11	0.12	0.27	0.15
b2597	JW2578	gene2658	raiA	7486.67	1310.22	-2.06	0.24	-5.82	0.17	-4.84	0.15	-1.72	0.75	-0.37	0.16	0.55	0.23	2.24	0.19	1.09	0.30	0.15	0.14	-0.16	0.19
b2598	JW2579	gene2659	pheL	11.00	1.00	-0.50	0.69	0.26	0.32	-0.98	0.66	0.30	0.63	-0.16	0.52	-0.07	0.54	1.22	0.41	0.76	0.47	-0.14	0.47	0.27	0.38
b0021	Null	gene266	insB1	0.00	0.00	NA	NA	1.39	2.21	NA	NA	NA	NA	NA	NA	NA	NA	0.48	1.01	NA	NA	NA	NA	NA	NA
b2599	JW2580	gene2660	pheA	1368.00	250.05	-0.23	0.35	-1.08	0.12	-1.05	0.12	-0.60	0.31	-0.90	0.15	-2.13	0.20	-0.26	0.17	-1.40	0.21	-1.55	0.15	-0.96	0.22
b2600	JW2581	gene2661	tyrA	115.33	20.22	0.14	0.34	1.42	0.12	0.49	0.19	0.26	0.26	0.03	0.20	-0.32	0.23	-0.68	0.21	-0.33	0.23	-0.41	0.19	0.03	0.17
b2601	JW2582	gene2662	aroF	188.00	34.08	-0.19	0.28	0.96	0.13	0.03	0.16	-0.15	0.23	-0.65	0.18	-0.71	0.21	-0.67	0.17	-0.20	0.20	-0.78	0.17	-0.44	0.20
b2602	JW5412	gene2663	yfiL	31.67	3.18	-0.55	0.54	-3.11	0.30	-3.90	0.69	-3.39	0.64	-2.64	0.49	-0.77	0.50	0.73	0.28	0.69	0.40	0.25	0.29	0.20	0.25
b2603	JW2584	gene2664	yfiR	7.67	1.86	2.58	0.53	2.95	0.34	2.42	0.44	1.85	0.57	1.13	0.53	2.69	0.43	1.95	0.43	1.01	0.50	0.79	0.50	0.25	0.41
-	-	gene2665	yfiN	22.67	1.20	-0.99	0.71	1.23	0.22	0.97	0.34	0.93	0.43	0.23	0.39	1.52	0.33	0.40	0.33	0.98	0.35	0.80	0.31	0.02	0.29
b2605	JW2586	gene2666	yfiB	11.33	2.67	0.61	0.62	1.21	0.30	1.78	0.40	1.89	0.43	1.78	0.40	3.03	0.35	2.37	0.35	2.49	0.35	1.80	0.35	0.60	0.32
b2606	JW2587	gene2667	rplS	2044.00	267.23	-1.13	0.21	2.64	0.08	2.22	0.10	1.62	0.40	0.70	0.15	0.65	0.27	-3.02	0.13	-2.70	0.26	-0.79	0.11	-0.45	0.23
b2607	JW2588	gene2668	trmD	4021.67	565.37	-0.44	0.19	2.57	0.09	2.19	0.10	1.54	0.45	0.75	0.19	0.61	0.25	-3.12	0.13	-2.44	0.26	-0.65	0.11	-0.36	0.19
b2608	JW5413	gene2669	rimM	3669.67	582.20	-0.41	0.18	2.93	0.07	2.00	0.09	1.38	0.42	0.49	0.14	0.39	0.28	-3.26	0.13	-2.66	0.27	-0.91	0.10	-0.23	0.20
-	-	gene267	insA	1.00	0.58	0.14	0.72	-4.17	1.60	0.97	1.34	0.26	1.34	-1.64	1.79	-0.60	1.40	0.39	1.08	-0.78	0.99	-0.43	0.79	-0.02	0.51
b2609	JW2590	gene2670	rpsP	1572.00	232.74	-0.87	0.22	2.30	0.10	2.24	0.10	1.69	0.47	0.79	0.17	0.76	0.28	-2.96	0.14	-2.25	0.27	-0.60	0.11	-0.49	0.19
b2610	JW5414	gene2671	ffh	1139.33	208.28	-0.02	0.19	0.31	0.08	0.43	0.11	-0.10	0.31	-0.17	0.16	-0.07	0.18	-0.92	0.13	-0.88	0.15	-0.64	0.11	-0.72	0.13
b2611	JW2592	gene2672	ypjD	110.00	19.66	0.56	0.38	0.77	0.12	0.78	0.18	0.52	0.31	-0.10	0.20	-0.59	0.26	-1.60	0.23	-0.97	0.27	-0.16	0.18	-0.22	0.18
b4461	JW5415	gene2673	yfjD	108.00	19.66	0.11	0.32	1.49	0.12	0.74	0.18	0.39	0.26	-0.10	0.21	-0.03	0.23	-1.49	0.23	-1.06	0.25	-0.37	0.19	-0.35	0.18
b2614	JW2594	gene2674	grpE	1209.00	185.65	-0.82	0.23	-0.24	0.10	0.46	0.10	1.48	0.44	0.80	0.18	0.06	0.17	-0.96	0.13	-0.47	0.16	0.34	0.10	0.32	0.14
b2615	JW2596	gene2675	nadK	128.67	16.58	0.92	0.25	0.05	0.12	-0.04	0.18	-0.06	0.26	-0.07	0.20	0.45	0.21	0.89	0.17	0.83	0.20	0.59	0.17	0.35	0.16
b2616	JW5416	gene2676	recN	73.00	19.14	0.49	0.39	1.88	0.18	1.60	0.20	1.61	0.27	1.57	0.22	1.57	0.26	1.78	0.19	1.44	0.23	0.50	0.22	0.29	0.23
b2617	JW2598	gene2677	bamE	220.67	27.72	0.63	0.30	1.11	0.11	1.73	0.12	1.96	0.20	1.19	0.18	1.22	0.21	1.55	0.14	0.88	0.21	0.75	0.14	0.45	0.16
b2618	JW2599	gene2678	ratB	9.33	2.67	0.86	0.64	4.30	0.29	4.09	0.33	3.91	0.49	2.92	0.37	2.64	0.41	1.88	0.40	1.62	0.43	1.46	0.41	0.94	0.34
b2619	JW2600	gene2679	ratA	86.67	12.91	0.28	0.37	1.64	0.14	1.57	0.18	1.43	0.28	0.75	0.22	0.77	0.24	0.50	0.20	-0.08	0.25	-0.07	0.20	-0.20	0.23
b0256	Null	gene268	insI1	2.67	0.33	0.11	0.79	-1.73	0.73	-1.32	1.28	-1.78	1.31	-2.12	1.31	-2.45	1.30	0.74	0.78	-0.05	0.80	-1.04	0.78	-0.34	0.49
b2620	JW2601	gene2680	smpB	87.67	11.62	1.37	0.35	2.74	0.13	2.91	0.15	2.39	0.31	2.24	0.18	2.66	0.20	1.72	0.18	1.55	0.20	1.46	0.16	0.94	0.18
b2622	JW2602	gene2682	intA	397.33	72.89	-0.13	0.30	-0.79	0.15	-0.95	0.17	-0.28	0.37	-0.63	0.19	-0.55	0.24	-0.08	0.17	-0.52	0.22	-0.36	0.15	-0.27	0.20
b2623	JW2603	gene2683	yfjH	5.67	1.86	0.52	0.76	2.17	0.40	1.35	0.63	0.93	0.65	1.50	0.58	1.74	0.55	1.25	0.54	1.22	0.55	0.78	0.54	0.91	0.38
b2624	JW2604	gene2684	alpA	1.00	0.58	0.61	0.78	0.67	0.96	1.40	1.32	1.33	1.22	1.45	1.21	1.18	1.14	-0.29	1.18	-0.73	0.98	0.10	0.80	0.22	0.51
b2625	JW2605	gene2685	yfjI	4.00	1.73	-0.95	0.80	0.54	0.52	0.55	0.88	-0.04	0.87	-0.10	0.86	0.66	0.80	-0.24	0.81	0.15	0.72	-0.35	0.70	-0.41	0.48
b2626	JW2607	gene2686	yfjJ	3.67	0.67	-0.34	0.81	0.24	0.53	-1.75	1.21	-0.26	0.87	0.07	0.89	-0.33	0.82	-0.54	0.81	0.11	0.72	-0.23	0.69	-0.36	0.47
b2627	JW2608	gene2687	yfjK	310.00	48.01	-0.77	0.28	-1.33	0.09	-1.81	0.17	-1.38	0.28	-0.52	0.18	0.16	0.23	0.40	0.14	0.36	0.17	0.02	0.13	-0.15	0.17
b2628	JW2609	gene2688	yfjL	145.67	21.73	0.18	0.31	0.37	0.12	-0.08	0.18	0.00	0.23	0.76	0.21	1.48	0.28	1.63	0.16	1.32	0.19	0.92	0.15	0.37	0.23
b2629	JW2610	gene2689	yfjM	1.00	0.58	0.74	0.77	2.85	0.84	0.40	1.56	0.97	1.40	0.10	1.50	0.29	1.31	0.89	1.05	0.12	0.98	0.39	0.80	0.20	0.51
-	-	gene269	insX	19.33	2.19	0.70	0.55	1.57	0.23	0.51	0.38	0.90	0.40	0.61	0.37	1.08	0.36	0.83	0.34	0.03	0.43	0.21	0.35	-0.15	0.29
b2630	JW2611	gene2690	rnlA	287.33	36.67	0.26	0.45	0.46	0.11	-0.39	0.15	-0.09	0.23	0.12	0.18	0.47	0.23	0.67	0.15	0.25	0.18	0.34	0.14	0.04	0.17
b2631	JW5418	gene2691	rnlB	39.67	2.91	1.94	0.41	1.73	0.18	0.46	0.28	0.22	0.35	-0.57	0.33	0.36	0.32	0.86	0.25	0.50	0.35	0.11	0.27	0.55	0.23
b2632	JW5419	gene2692	yfjP	18.67	3.28	-0.35	0.62	-0.98	0.28	-1.22	0.52	-0.40	0.46	-1.44	0.51	-0.38	0.50	1.09	0.33	0.99	0.35	0.49	0.35	0.51	0.26
b2633	JW2614	gene2693	yfjQ	9.33	2.60	0.09	0.70	-1.99	0.44	-2.09	0.85	-1.00	0.90	-3.35	0.98	-3.00	0.91	-2.05	0.70	-1.83	0.70	-1.56	0.61	-1.03	0.40
b2634	JW2615	gene2694	yfjR	0.00	0.00	1.40	0.75	4.59	1.98	4.09	2.24	3.84	1.91	3.44	2.09	3.26	1.58	3.29	1.20	2.41	0.99	1.84	0.80	0.45	0.39
b2635	JW5888	gene2695	ypjK	0.00	0.00	NA	NA	2.98	2.10	NA	NA	1.34	2.07	NA	NA	NA	NA	NA	NA	NA	NA	NA	NA	0.05	0.21
b2636	JW5921	gene2696	yfjS	1.00	0.00	-0.48	0.65	1.39	0.90	1.58	1.22	0.58	1.31	1.46	1.19	1.33	1.06	1.63	0.94	0.50	0.94	0.47	0.80	0.24	0.51
b2637	JW2618	gene2697	yfjT	3.33	0.67	0.29	0.80	0.35	0.56	1.10	0.80	1.84	0.65	1.00	0.76	1.30	0.70	1.99	0.60	1.17	0.66	-0.20	0.71	0.51	0.44
-	-	gene2698	yfjU	1.00	0.58	0.83	0.80	2.02	0.88	0.22	1.53	0.50	1.42	-1.70	1.78	-1.26	1.51	0.60	1.04	-0.28	0.99	0.29	0.80	0.20	0.51
-	-	gene2699	yfjV	9.33	3.93	2.57	0.59	1.81	0.33	0.64	0.56	1.00	0.55	0.12	0.58	0.68	0.55	0.74	0.50	0.49	0.52	0.34	0.49	0.81	0.34
b0028	JW0026	gene27	fkpB	207.67	27.71	-0.23	0.25	0.46	0.11	0.68	0.14	0.63	0.19	-0.04	0.17	-0.19	0.19	-0.95	0.19	-0.93	0.20	-0.32	0.15	-0.50	0.16
-	-	gene270	yagB	20.67	2.96	1.09	0.45	0.04	0.24	-0.46	0.43	0.16	0.41	-0.14	0.39	0.69	0.36	0.65	0.33	0.51	0.37	0.46	0.33	0.04	0.28
b2642	JW2623	gene2700	yfjW	47.00	11.72	-1.84	0.59	-1.02	0.22	-1.72	0.39	-0.56	0.49	-0.24	0.34	0.56	0.29	-0.25	0.28	0.22	0.31	0.31	0.25	-0.03	0.27
-	-	gene2701	ypjI	1.00	0.58	-0.33	0.57	-3.24	1.53	-0.30	1.71	-1.13	1.75	-3.18	2.15	-1.06	1.53	-0.46	1.22	-1.26	0.94	-0.96	0.71	-0.62	0.47
b2643	JW2624	gene2702	yfjX	0.33	0.33	-0.09	0.49	-2.27	2.11	-1.51	2.51	-1.30	2.07	-1.54	2.21	-1.00	1.52	-0.25	1.19	-0.45	0.69	-0.31	0.48	-0.19	0.31
b2644	JW2625	gene2703	yfjY	0.67	0.33	-0.24	0.53	-0.58	1.30	-2.71	2.41	-0.84	1.83	-1.03	1.91	-0.70	1.57	-0.52	1.26	-1.02	0.90	-0.40	0.73	-0.32	0.46
b4548	JW5421	gene2704	ypjJ	0.33	0.33	0.80	0.73	0.64	1.53	0.78	2.21	0.05	2.05	0.59	1.98	0.73	1.58	0.08	1.23	0.31	0.95	-0.03	0.62	-0.02	0.38
b2645	JW2626	gene2705	yfjZ	0.33	0.33	-0.12	0.49	0.48	1.52	-0.08	2.33	1.17	1.76	0.47	2.01	0.99	1.53	1.26	1.21	0.61	0.99	0.39	0.75	0.17	0.45
b2646	JW2627	gene2706	ypjF	1.67	0.33	0.40	0.80	1.71	0.70	0.98	1.07	0.64	1.09	-0.08	1.17	-0.32	1.26	0.68	0.92	-0.43	0.94	0.33	0.76	-0.04	0.51
b2647	JW5422	gene2708	ypjA	41.00	5.51	0.41	0.38	-0.58	0.19	-1.35	0.36	-0.77	0.38	-0.93	0.33	-0.08	0.45	1.96	0.23	2.27	0.23	0.99	0.23	0.81	0.25
-	-	gene2709	pinH	0.00	0.00	0.42	0.52	3.49	2.05	1.72	2.51	1.91	2.09	NA	NA	0.97	1.53	NA	NA	NA	NA	NA	NA	0.11	0.24
b0267	JW0260	gene271	yagA	5.33	1.45	0.95	0.70	-3.47	0.68	-5.42	2.06	-3.49	1.33	-2.56	1.06	-2.69	1.07	-0.32	0.68	-0.45	0.69	0.18	0.59	-0.09	0.42
-	-	gene2710	ypjC	0.00	0.00	NA	NA	5.23	1.92	4.28	2.20	2.03	2.10	1.33	2.22	1.05	1.55	1.64	1.25	0.43	0.70	0.62	0.64	0.40	0.38
-	-	gene2712	ygaQ	2.33	0.33	0.26	0.80	1.73	0.61	-0.40	1.17	-0.50	1.11	-2.68	1.52	-3.57	1.55	-1.05	1.00	-1.00	0.93	-1.43	0.80	-0.32	0.50
b2659	JW5427	gene2713	csiD	5716.00	991.25	-0.46	0.48	-9.85	0.14	-9.62	0.33	-8.13	0.56	-9.20	0.28	-6.47	0.46	-1.49	0.12	-0.93	0.21	-1.32	0.13	-0.10	0.29
b2660	JW2635	gene2714	lhgO	2009.33	412.59	0.57	0.43	-8.79	0.20	-8.94	0.44	-8.15	0.43	-8.12	0.33	-5.25	0.43	-1.67	0.18	-0.67	0.29	-0.98	0.14	0.17	0.31
b2661	JW2636	gene2715	gabD	1654.67	297.11	0.93	0.39	-7.54	0.16	-8.34	0.40	-7.62	0.45	-6.66	0.24	-4.48	0.46	-1.17	0.14	-0.22	0.30	-0.95	0.14	0.42	0.31
b2662	JW2637	gene2716	gabT	1611.33	304.02	0.90	0.39	-7.61	0.16	-8.41	0.41	-8.05	0.45	-6.60	0.27	-4.38	0.45	-1.29	0.18	0.32	0.32	-0.69	0.13	0.64	0.30
b2663	JW2638	gene2717	gabP	848.67	149.34	-0.12	0.39	-7.74	0.18	-7.37	0.40	-7.62	0.47	-7.25	0.36	-5.34	0.44	-1.08	0.13	0.01	0.31	-0.98	0.14	0.32	0.22
b2664	JW2639	gene2718	csiR	153.33	36.79	0.18	0.40	-3.02	0.20	-3.35	0.32	-2.57	0.42	-3.09	0.30	-2.13	0.32	0.15	0.22	1.34	0.31	0.25	0.19	1.24	0.26
b2665	JW2640	gene2719	ygaU	7560.67	1448.10	-0.98	0.42	-8.13	0.16	-7.46	0.19	-7.67	0.30	-6.39	0.20	-4.11	0.42	-1.67	0.15	-1.36	0.19	-1.18	0.13	-0.61	0.18
b0268	JW0261	gene272	yagE	24.33	4.18	2.02	0.42	-1.88	0.30	-1.39	0.49	1.89	0.82	2.46	0.42	1.00	0.44	1.03	0.32	1.87	0.36	1.59	0.28	1.33	0.35
b2666	JW2641	gene2720	yqaE	140.67	19.34	-2.78	0.45	-3.91	0.22	-3.07	0.31	-4.35	0.52	-4.38	0.39	-2.62	0.40	0.01	0.20	-0.16	0.25	-0.40	0.22	0.03	0.31
b2667	JW2642	gene2721	ygaV	3.67	0.33	0.58	0.76	2.27	0.47	1.21	0.73	1.11	0.69	1.50	0.67	1.43	0.66	1.14	0.65	0.89	0.64	0.67	0.62	0.84	0.42
b2668	JW2643	gene2722	ygaP	35.33	6.12	-1.05	0.52	1.28	0.21	-0.08	0.33	0.30	0.35	-0.45	0.33	-0.27	0.39	0.52	0.29	0.36	0.31	-0.18	0.30	-0.08	0.24
b2669	JW2644	gene2723	stpA	20.00	3.00	-0.52	0.58	4.14	0.26	5.64	0.22	5.34	0.43	4.10	0.29	3.38	0.28	0.78	0.33	0.94	0.39	0.10	0.37	0.27	0.32
b2670	JW2645	gene2724	alaE	745.33	124.72	0.52	0.25	-4.33	0.22	-5.93	0.48	-5.75	0.39	-4.58	0.26	-2.99	0.26	-2.29	0.17	-2.87	0.21	-2.25	0.15	-1.42	0.18
b2671	JW2646	gene2725	ygaC	43.00	6.56	0.12	0.44	-0.38	0.21	-1.90	0.39	-2.18	0.44	-2.14	0.38	-1.08	0.40	0.68	0.26	0.49	0.29	-0.48	0.28	-0.01	0.22
b2672	JW2647	gene2726	ygaM	793.33	195.22	-0.13	0.36	-7.09	0.23	-8.64	0.63	-7.10	0.48	-4.09	0.23	-1.56	0.47	0.75	0.16	0.92	0.23	0.24	0.15	0.87	0.29
b2673	JW2648	gene2727	nrdH	36.67	3.18	-0.50	0.50	-0.94	0.24	0.16	0.31	-0.06	0.57	-3.61	0.55	-5.38	0.88	-4.17	0.56	-4.39	0.63	-4.66	0.61	-1.84	0.43
b2674	JW2649	gene2728	nrdI	12.00	2.52	1.34	0.54	-0.15	0.32	0.96	0.45	0.44	0.69	-2.12	0.74	-5.53	1.37	-3.60	0.80	-3.05	0.75	-3.14	0.69	-0.76	0.49
b2675	JW2650	gene2729	nrdE	255.00	40.61	-0.37	0.61	-0.99	0.13	0.47	0.14	-0.24	0.49	-3.33	0.23	-5.23	0.41	-4.88	0.28	-4.46	0.30	-4.81	0.29	-2.56	0.37
b0269	JW0262	gene273	yagF	13.33	5.04	4.08	0.40	0.14	0.33	-1.42	0.67	1.88	0.77	3.09	0.91	1.66	0.53	0.86	0.49	2.12	0.41	1.97	0.37	1.35	0.50
b2676	JW2651	gene2730	nrdF	54.33	10.17	-0.13	0.61	0.01	0.18	1.43	0.21	0.43	0.70	-2.72	0.39	-4.44	0.59	-3.32	0.40	-3.72	0.48	-4.11	0.47	-2.75	0.32
b2677	JW2652	gene2731	proV	29.00	3.61	-1.28	0.57	-0.56	0.24	5.37	0.19	5.73	0.48	5.43	0.23	2.36	1.01	2.75	0.23	2.63	0.30	1.06	0.27	-0.12	0.28
b2678	JW2653	gene2732	proW	11.67	2.19	-0.73	0.74	-0.69	0.34	5.38	0.28	5.56	0.56	6.06	0.34	3.35	1.08	3.08	0.32	3.39	0.33	1.80	0.36	0.94	0.30
b2679	JW2654	gene2733	proX	28.33	6.69	-1.35	0.60	-1.23	0.24	4.75	0.20	5.39	0.46	6.16	0.22	4.13	1.03	4.11	0.24	3.59	0.27	1.71	0.26	0.55	0.30
-	-	gene2734	ygaY	6.67	1.20	1.62	0.68	1.85	0.38	2.01	0.49	1.76	0.67	0.64	0.57	0.56	0.60	0.70	0.54	1.31	0.49	1.13	0.48	0.71	0.39
b2682	JW2657	gene2735	ygaZ	63.33	10.74	0.59	0.36	1.68	0.14	2.58	0.17	2.16	0.28	1.61	0.24	2.12	0.22	1.13	0.20	0.94	0.22	0.97	0.20	0.48	0.28
b2683	JW2658	gene2736	ygaH	9.33	3.18	-0.50	0.73	2.26	0.31	3.32	0.37	3.01	0.50	2.45	0.41	2.35	0.48	1.30	0.45	1.51	0.44	1.16	0.43	0.53	0.37
b2684	JW2659	gene2737	mprA	54.33	10.04	1.21	0.42	3.98	0.16	4.10	0.18	3.74	0.34	3.54	0.21	3.34	0.26	2.30	0.20	2.28	0.23	1.87	0.19	0.61	0.34
b2685	JW2660	gene2738	emrA	48.67	9.49	0.66	0.38	3.61	0.15	2.95	0.18	2.23	0.40	1.81	0.23	1.43	0.26	0.62	0.24	0.70	0.27	0.16	0.24	0.03	0.21
b2686	JW2661	gene2739	emrB	36.33	5.84	0.92	0.41	3.22	0.17	2.32	0.22	1.34	0.47	1.18	0.28	1.17	0.28	0.15	0.28	0.31	0.33	-0.11	0.30	0.24	0.23
b0270	JW0263	gene274	yagG	10.67	4.63	1.66	0.58	-1.71	0.52	-1.88	0.83	-0.21	0.76	-0.23	0.64	-0.30	0.76	0.60	0.48	1.21	0.49	0.75	0.46	0.87	0.41
b2687	JW2662	gene2740	luxS	1831.67	341.80	-1.08	0.36	-1.51	0.14	-1.19	0.13	-1.21	0.24	-1.03	0.16	-0.83	0.23	-0.34	0.15	0.08	0.17	0.12	0.12	0.22	0.17
b2688	JW2663	gene2742	gshA	1885.67	243.67	-1.08	0.21	-0.64	0.09	-0.51	0.11	-0.74	0.18	-0.86	0.14	-0.61	0.17	-0.64	0.13	-0.43	0.16	-0.49	0.11	-0.27	0.16
b2689	JW2664	gene2743	yqaA	168.33	24.21	-0.83	0.34	0.00	0.13	0.08	0.17	-0.01	0.25	-0.73	0.22	-0.33	0.22	-0.12	0.18	-0.42	0.21	-0.36	0.17	-0.16	0.17
b2690	JW2665	gene2744	yqaB	105.33	18.66	-0.46	0.38	0.97	0.12	0.78	0.18	0.50	0.25	0.33	0.20	0.88	0.24	0.40	0.19	0.13	0.22	0.14	0.19	0.05	0.18
b0271	JW0264	gene275	yagH	14.67	3.53	2.12	0.49	-1.42	0.49	-1.62	0.65	-1.52	0.66	-0.14	0.69	-1.17	0.74	-0.09	0.49	1.08	0.50	0.97	0.40	0.84	0.44
b2696	JW2666	gene2750	csrA	2138.00	313.01	-1.05	0.29	-0.54	0.13	-0.67	0.12	-0.81	0.21	-0.97	0.16	-0.63	0.21	0.71	0.14	0.43	0.22	0.07	0.12	0.10	0.16
b2697	JW2667	gene2751	alaS	2506.67	444.65	-0.15	0.16	1.39	0.09	1.03	0.10	0.84	0.16	0.68	0.15	0.50	0.18	-0.70	0.12	-0.37	0.16	-0.10	0.10	-0.15	0.16
b2698	JW2668	gene2752	recX	12.67	2.19	-0.03	0.59	1.69	0.28	0.69	0.46	0.36	0.47	-0.26	0.50	-0.74	0.59	-2.79	0.68	-1.34	0.56	-0.83	0.49	-0.63	0.34
b2699	JW2669	gene2753	recA	761.67	100.62	0.01	0.19	0.82	0.07	0.62	0.11	0.67	0.21	0.75	0.14	0.99	0.15	-0.05	0.13	0.10	0.15	-0.13	0.11	-0.13	0.13
b2700	JW2670	gene2754	pncC	86.33	12.20	-0.20	0.40	0.02	0.14	-0.17	0.23	0.38	0.29	0.75	0.21	0.78	0.25	-0.85	0.23	-0.51	0.31	-0.24	0.21	0.04	0.18
b2701	JW2671	gene2755	mltB	258.67	55.11	-0.61	0.25	-0.26	0.12	-0.65	0.16	-1.05	0.31	-1.07	0.18	-1.01	0.25	-1.08	0.17	-0.10	0.23	0.15	0.14	0.38	0.17
b2702	JW5429	gene2756	srlA	4.33	0.88	0.84	0.71	-2.70	0.66	-0.33	0.90	5.01	1.04	8.35	0.42	5.99	0.45	4.72	0.44	2.49	0.54	1.05	0.57	0.14	0.43
b2703	JW5430	gene2757	srlE	6.00	1.73	1.15	0.64	-2.95	0.60	-0.23	0.77	4.50	0.98	8.20	0.36	5.88	0.40	4.78	0.37	2.58	0.48	0.89	0.51	-0.02	0.43
b2704	JW2673	gene2758	srlB	3.00	0.58	0.76	0.77	-2.90	0.80	-0.51	1.11	3.34	0.85	7.29	0.49	5.34	0.54	3.78	0.52	1.39	0.67	-0.58	0.74	-0.27	0.48
b2705	JW2674	gene2759	srlD	33.67	4.33	-0.90	0.52	-2.62	0.28	-0.56	0.37	3.02	0.81	6.68	0.22	4.83	0.34	3.47	0.23	1.13	0.40	-0.27	0.31	-0.52	0.26
b0272	JW0265	gene276	yagI	27.00	6.03	0.86	0.45	1.01	0.21	1.00	0.31	1.62	0.36	1.44	0.31	0.77	0.35	0.27	0.32	0.46	0.34	0.75	0.30	0.63	0.29
b2706	JW2675	gene2760	srlM	1.67	0.33	0.77	0.80	0.15	0.82	0.11	1.24	2.68	1.15	5.78	0.66	3.30	0.74	1.66	0.81	1.27	0.78	0.67	0.75	1.08	0.48
b2707	JW2676	gene2761	srlR	74.00	9.17	-1.29	0.41	0.54	0.15	0.49	0.22	1.40	0.42	2.58	0.20	2.15	0.25	0.88	0.22	0.09	0.29	0.14	0.22	-0.48	0.22
b2708	JW5431	gene2762	srlQ	26.67	5.78	1.36	0.44	1.15	0.20	0.90	0.32	1.34	0.36	3.30	0.29	2.71	0.32	0.69	0.30	1.20	0.31	0.80	0.28	0.39	0.24
b2709	JW5843	gene2763	norR	48.00	9.07	0.71	0.51	0.57	0.19	-0.05	0.30	0.03	0.35	0.78	0.27	0.00	0.36	1.20	0.24	0.94	0.32	0.31	0.26	0.51	0.24
b2710	JW2680	gene2764	norV	46.33	8.69	-0.47	0.57	-1.83	0.21	-2.38	0.42	-1.97	0.40	-2.65	0.42	-1.60	0.45	-0.51	0.29	-0.72	0.31	-0.78	0.29	-0.15	0.24
b2711	JW2681	gene2765	norW	17.33	0.88	0.00	0.58	-1.74	0.32	-1.75	0.59	-3.08	0.75	-1.93	0.55	-1.26	0.51	-0.46	0.42	-0.88	0.46	-0.50	0.42	-0.23	0.30
b2712	JW5433	gene2766	hypF	90.33	7.84	0.30	0.33	-1.09	0.16	-1.22	0.26	-1.24	0.30	1.05	0.22	1.36	0.40	0.18	0.21	0.17	0.24	0.23	0.19	0.02	0.22
b2713	JW2683	gene2767	hydN	4.33	0.88	0.34	0.76	-0.55	0.54	-1.57	1.07	-0.52	0.81	0.14	0.76	-0.41	0.79	-0.59	0.78	-0.15	0.70	-0.30	0.66	-0.07	0.43
b2714	JW5434	gene2768	ascG	25.00	5.13	0.55	0.55	-0.13	0.24	-0.23	0.39	0.61	0.40	0.62	0.34	0.20	0.39	0.39	0.33	0.42	0.35	0.42	0.31	0.70	0.26
b2715	JW5435	gene2769	ascF	16.33	2.40	1.44	0.44	-0.47	0.28	-0.63	0.49	-0.17	0.53	-0.02	0.42	0.81	0.38	0.99	0.35	1.06	0.37	0.87	0.34	0.32	0.29
b0273	JW0266	gene277	argF	20.33	2.60	1.43	0.46	1.08	0.23	0.01	0.42	0.00	0.40	0.54	0.36	-0.18	0.42	-0.17	0.38	0.33	0.36	-0.20	0.37	0.40	0.34
b2716	JW2686	gene2770	ascB	51.33	4.67	-0.06	0.43	-0.54	0.17	-1.23	0.32	-0.77	0.45	-0.74	0.30	-0.82	0.32	0.36	0.24	0.22	0.29	-0.15	0.25	-0.21	0.21
b2717	JW2687	gene2771	hycI	70.00	7.94	0.51	0.36	-1.07	0.18	-1.55	0.30	-1.50	0.40	-1.29	0.27	-0.52	0.26	-0.30	0.23	-0.45	0.27	-0.54	0.23	-0.21	0.19
b2718	JW2688	gene2772	hycH	12.00	0.58	-0.49	0.67	-1.15	0.34	-1.62	0.68	-1.36	0.63	-1.19	0.59	-0.99	0.56	-0.21	0.47	-0.51	0.51	-0.11	0.45	0.10	0.33
b2719	JW2689	gene2773	hycG	7.33	2.33	0.86	0.65	-0.14	0.42	-0.94	0.78	-0.95	0.87	-0.76	0.71	-0.47	0.71	-0.35	0.62	0.12	0.59	0.17	0.54	0.73	0.37
b2720	JW2690	gene2774	hycF	3.00	1.00	-0.87	0.79	-0.98	0.67	-1.99	1.34	-4.44	1.86	-0.76	1.05	-0.72	1.02	-0.53	0.87	0.37	0.76	-0.39	0.72	-0.20	0.48
b2721	JW2691	gene2775	hycE	10.67	1.76	1.20	0.55	-0.65	0.35	-1.09	0.67	-0.68	0.60	-0.63	0.60	-0.16	0.52	-1.08	0.60	-0.49	0.53	-0.33	0.49	-0.45	0.34
b2722	JW2692	gene2776	hycD	2.67	0.88	0.82	0.78	-0.35	0.68	-1.82	1.41	-1.81	1.28	-0.72	1.12	-1.31	1.10	-1.63	1.04	-0.64	0.87	0.01	0.73	0.03	0.50
b2723	JW2693	gene2777	hycC	2.33	0.33	0.54	0.80	0.11	0.73	0.14	1.08	-0.22	0.99	0.65	0.93	1.07	0.81	0.14	0.88	1.00	0.77	1.30	0.65	0.67	0.46
b2724	JW2694	gene2778	hycB	2.67	0.33	-1.07	0.77	-2.01	0.78	-2.68	1.60	-1.32	1.17	-0.98	1.10	-1.80	1.17	-0.85	0.93	-0.90	0.88	-0.64	0.76	-0.45	0.49
b2725	JW2695	gene2779	hycA	2.00	1.00	0.31	0.80	-1.32	0.85	-1.18	1.53	-3.65	1.97	-4.04	2.05	-1.27	1.30	-1.85	1.19	-1.29	0.99	-1.13	0.80	-0.42	0.51
-	-	gene278	ykgS	7.67	1.20	1.13	0.65	1.49	0.35	0.88	0.56	0.70	0.58	-0.19	0.63	0.92	0.53	0.63	0.51	0.29	0.65	-0.71	0.58	-0.54	0.40
b2726	JW2696	gene2780	hypA	9.00	2.08	-2.17	0.80	-1.35	0.41	-0.99	0.71	-1.29	0.75	2.17	0.42	2.76	0.52	2.20	0.39	1.04	0.46	0.92	0.44	0.19	0.41
b2727	JW2697	gene2781	hypB	68.33	19.85	-0.06	0.52	-1.79	0.23	-1.60	0.33	-1.24	0.45	2.48	0.22	2.97	0.42	2.11	0.20	1.46	0.25	1.18	0.21	0.38	0.36
b2728	JW2698	gene2782	hypC	3.67	0.88	0.41	0.80	-0.82	0.60	-0.46	1.13	-1.15	0.99	2.81	0.56	3.40	0.60	2.24	0.55	1.29	0.62	1.07	0.58	0.64	0.46
b2729	JW2699	gene2783	hypD	80.67	26.30	-0.34	0.47	-1.85	0.28	-2.13	0.35	-2.00	0.44	1.91	0.25	2.16	0.45	1.10	0.22	0.80	0.28	0.70	0.22	0.50	0.28
b2730	JW2700	gene2784	hypE	96.33	22.88	0.71	0.30	-2.35	0.19	-2.15	0.30	-2.72	0.38	1.10	0.21	1.14	0.43	0.17	0.21	0.16	0.25	0.30	0.20	0.53	0.21
b2731	JW2701	gene2785	fhlA	312.33	52.66	-0.82	0.26	-3.02	0.11	-3.04	0.20	-3.70	0.29	-1.82	0.24	-1.41	0.23	-0.71	0.16	-0.20	0.18	-0.02	0.13	0.01	0.15
b2732	JW2702	gene2786	ygbA	4.33	1.45	1.56	0.67	0.28	0.51	0.72	0.75	0.81	0.71	0.71	0.71	1.47	0.61	1.91	0.55	1.67	0.58	0.60	0.59	0.78	0.41
b2733	JW2703	gene2787	mutS	173.33	29.90	0.74	0.25	2.23	0.11	1.82	0.13	1.40	0.27	1.38	0.21	1.58	0.31	-0.60	0.18	-0.32	0.20	0.04	0.15	-0.25	0.15
b2734	JW2704	gene2788	pphB	1.33	0.67	1.31	0.80	3.76	0.72	2.31	1.00	2.25	0.98	1.01	1.15	1.73	1.01	0.44	1.04	-0.58	0.99	0.06	0.80	-0.06	0.51
b2735	JW2705	gene2789	ygbI	63.67	13.38	0.45	0.35	-0.36	0.16	-0.86	0.29	-0.52	0.30	-0.08	0.25	0.17	0.27	0.56	0.23	0.12	0.26	-0.01	0.23	0.04	0.22
b0021	Null	gene279	insB1	0.33	0.33	0.88	0.72	2.03	1.35	1.73	1.79	0.74	1.96	-1.70	2.22	0.46	1.63	-0.34	1.21	0.33	0.97	0.21	0.73	-0.13	0.37
b2736	JW2706	gene2790	ygbJ	17.33	1.45	0.79	0.53	-2.23	0.36	-2.54	0.71	-0.48	0.80	-0.34	0.49	-0.20	0.46	1.05	0.34	1.28	0.36	0.64	0.35	0.45	0.28
b2737	JW2707	gene2791	ygbK	21.67	4.81	1.80	0.42	-1.46	0.27	-2.22	0.58	-0.18	0.52	-0.38	0.40	-0.03	0.40	0.95	0.32	1.19	0.32	0.50	0.33	0.38	0.26
b2738	JW2708	gene2792	ygbL	9.33	1.67	0.69	0.62	-0.99	0.42	-1.02	0.70	0.01	0.60	0.24	0.52	0.35	0.52	0.69	0.47	1.04	0.49	0.45	0.46	0.45	0.33
b2739	JW2709	gene2793	ygbM	22.33	2.91	0.45	0.57	-1.76	0.29	-2.24	0.57	-0.79	0.48	-0.70	0.44	-1.01	0.48	0.17	0.35	0.32	0.38	0.17	0.34	0.11	0.28
b2740	JW2710	gene2794	ygbN	17.67	4.06	0.24	0.52	-0.70	0.27	-1.45	0.56	-1.00	0.49	-0.99	0.49	-0.91	0.51	-0.26	0.40	-0.38	0.44	-0.31	0.40	0.10	0.29
b2741	JW5437	gene2795	rpoS	8916.33	1570.62	-0.80	0.18	-4.27	0.07	-4.02	0.16	-3.59	0.26	-3.14	0.13	-2.67	0.36	-0.24	0.13	-0.29	0.15	-0.27	0.11	0.06	0.14
b2742	JW2712	gene2796	nlpD	2101.33	439.66	0.57	0.18	-2.38	0.10	-2.69	0.17	-2.37	0.20	-2.07	0.16	-1.78	0.29	-0.08	0.14	-0.02	0.18	-0.21	0.12	0.59	0.25
b2743	JW2713	gene2797	pcm	173.00	27.75	-0.37	0.30	-0.09	0.13	-0.21	0.19	-0.54	0.25	-0.39	0.19	0.32	0.20	0.40	0.16	0.28	0.19	0.09	0.16	0.07	0.16
b2744	JW2714	gene2798	umpG	109.67	19.68	-0.15	0.30	0.86	0.12	0.55	0.18	0.45	0.25	0.48	0.20	1.13	0.20	1.14	0.17	1.13	0.19	0.56	0.17	0.69	0.16
b2745	JW2715	gene2799	truD	163.00	25.38	-0.50	0.31	1.68	0.11	1.30	0.15	0.92	0.29	0.99	0.17	1.58	0.18	1.19	0.16	0.98	0.18	0.43	0.15	0.28	0.16
b0029	JW0027	gene28	ispH	254.67	37.35	-0.10	0.25	1.02	0.12	0.85	0.13	0.66	0.19	0.27	0.18	-0.18	0.18	-1.44	0.17	-1.08	0.19	-0.46	0.14	-0.25	0.14
-	-	gene280	insA	0.00	0.00	NA	NA	NA	NA	NA	NA	NA	NA	NA	NA	1.05	1.55	NA	NA	0.41	0.69	NA	NA	NA	NA
b2746	JW2716	gene2800	ispF	28.00	3.21	0.24	0.46	2.62	0.18	2.13	0.26	1.93	0.39	1.62	0.29	2.15	0.30	0.67	0.29	1.34	0.30	1.12	0.29	0.58	0.24
b2747	JW2717	gene2801	ispD	38.33	7.69	1.05	0.51	2.69	0.17	2.39	0.22	1.92	0.45	1.43	0.25	1.72	0.26	0.49	0.26	0.80	0.30	0.82	0.25	0.51	0.22
b2748	JW2718	gene2802	ftsB	106.33	14.40	0.37	0.34	1.07	0.13	0.89	0.18	0.58	0.38	-0.15	0.22	0.23	0.26	0.51	0.19	0.38	0.22	0.21	0.20	0.02	0.21
b2749	JW2719	gene2803	ygbE	25.33	4.63	1.75	0.45	1.28	0.21	0.34	0.35	0.93	0.36	-0.61	0.42	-0.15	0.37	-0.03	0.33	0.36	0.43	0.40	0.31	0.31	0.24
b2750	JW2720	gene2804	cysC	162.33	28.53	-3.24	0.42	-5.70	0.21	-4.99	0.42	-5.81	0.57	-5.02	0.39	-0.75	0.43	-4.46	0.31	-1.14	0.87	-2.65	0.22	-3.04	0.20
b2751	JW2721	gene2805	cysN	1844.67	310.27	-3.46	0.39	-6.86	0.16	-6.08	0.21	-6.10	0.49	-5.93	0.52	-1.50	0.39	-4.99	0.18	-1.14	0.85	-3.26	0.14	-2.77	0.20
b2752	JW2722	gene2806	cysD	2177.33	403.26	-5.40	0.36	-8.27	0.14	-6.68	0.22	-6.66	0.76	-6.08	0.25	-2.20	0.31	-6.27	0.18	-1.02	0.89	-3.90	0.12	-2.72	0.26
b2753	JW2723	gene2807	iap	14.67	2.73	0.99	0.67	3.62	0.24	1.45	0.38	1.33	0.41	0.85	0.41	1.64	0.38	0.54	0.40	0.44	0.42	-0.24	0.43	-0.68	0.33
b2754	JW5438	gene2808	ygbF	4.33	0.67	0.26	0.77	1.41	0.46	-0.64	0.93	-0.39	0.80	-0.98	0.92	-1.09	0.87	0.90	0.64	0.89	0.62	0.03	0.63	0.58	0.41
b2755	JW2725	gene2809	ygbT	8.67	2.33	1.14	0.67	0.96	0.36	-0.16	0.63	0.27	0.56	0.50	0.54	1.03	0.50	1.51	0.43	1.37	0.45	0.53	0.48	0.79	0.33
-	-	gene281	yagJ	22.33	1.86	0.25	0.61	0.40	0.25	-0.89	0.45	-0.56	0.47	-0.52	0.42	0.83	0.36	1.36	0.30	0.50	0.36	0.35	0.33	0.24	0.30
b2756	JW2726	gene2810	casE	6.33	1.76	-0.52	0.77	0.87	0.43	-0.09	0.73	0.46	0.62	0.74	0.59	1.14	0.55	2.04	0.46	1.85	0.48	1.04	0.50	0.54	0.37
b2757	JW5844	gene2811	casD	8.33	1.20	-1.11	0.76	0.10	0.41	-0.65	0.69	-0.26	0.60	-0.16	0.59	0.56	0.51	1.20	0.45	1.20	0.46	0.08	0.50	-0.18	0.40
b2758	JW2728	gene2812	casC	7.00	1.15	0.55	0.66	1.03	0.38	-0.09	0.68	0.48	0.58	0.57	0.57	0.63	0.63	1.99	0.44	2.14	0.44	0.96	0.48	0.67	0.36
b2759	JW2729	gene2813	casB	1.33	0.67	-0.42	0.61	1.00	0.82	0.42	1.36	1.26	1.08	1.70	1.04	1.97	0.94	2.60	0.78	2.96	0.70	1.51	0.71	0.99	0.49
b2760	JW2730	gene2814	casA	7.33	1.76	-0.31	0.77	-0.35	0.41	-2.25	0.97	-1.11	0.75	-1.02	0.72	-0.19	0.61	-0.16	0.61	0.37	0.54	-0.32	0.58	-0.21	0.38
b2761	JW2731	gene2815	ygcB	22.00	5.51	-1.20	0.65	-0.28	0.25	-1.65	0.55	-0.11	0.48	0.37	0.38	2.36	0.31	1.93	0.29	1.09	0.33	0.01	0.35	-0.34	0.29
b2762	JW2732	gene2817	cysH	2103.00	310.95	-4.29	0.36	-6.97	0.10	-5.26	0.17	-6.10	0.63	-6.64	0.24	-1.80	0.34	-6.62	0.19	-3.19	0.67	-2.82	0.11	-2.50	0.18
b2763	JW2733	gene2818	cysI	5087.33	984.96	-4.01	0.28	-7.74	0.16	-6.10	0.17	-6.76	0.80	-7.11	0.27	-1.96	0.34	-7.47	0.44	-2.37	0.82	-2.91	0.14	-2.77	0.18
b2764	JW2734	gene2819	cysJ	3897.67	847.06	-3.02	0.29	-7.42	0.17	-6.08	0.19	-6.59	0.89	-6.24	0.61	-2.31	0.31	-7.64	0.23	-1.81	0.82	-2.81	0.16	-2.03	0.21
b0277	JW0271	gene282	yagK	7.33	0.33	0.94	0.66	1.61	0.35	0.48	0.60	1.06	0.55	0.25	0.59	0.21	0.57	0.81	0.50	-0.06	0.58	-0.38	0.56	-0.28	0.38
b2765	JW2735	gene2820	queD	15.67	5.70	1.95	0.64	5.04	0.23	4.24	0.26	3.77	0.48	1.70	0.38	1.49	0.50	-0.70	0.50	-0.26	0.47	0.67	0.38	0.00	0.35
b2766	JW2736	gene2821	ygcN	7.00	1.73	1.96	0.72	3.63	0.36	2.94	0.42	3.20	0.44	3.46	0.40	3.73	0.40	3.05	0.40	2.41	0.42	1.00	0.50	0.27	0.44
b2767	JW2737	gene2822	ygcO	0.67	0.33	0.73	0.76	1.05	1.10	-0.96	2.05	0.24	1.72	2.43	1.18	2.24	1.11	1.53	1.05	0.68	0.98	-0.44	0.74	-0.23	0.47
b2768	JW2738	gene2823	ygcP	1.33	0.88	0.34	0.79	2.78	0.74	1.68	1.08	3.26	0.87	3.73	0.80	4.01	0.75	3.35	0.71	2.46	0.73	1.45	0.71	0.67	0.50
b2769	JW5440	gene2824	ygcQ	5.67	2.60	0.99	0.70	-0.51	0.53	-1.04	0.95	-1.10	0.95	-0.81	0.85	-0.67	0.86	-0.23	0.69	-0.47	0.74	0.02	0.62	-0.05	0.43
b2770	JW5441	gene2825	ygcR	4.00	1.53	-0.77	0.80	-1.81	0.65	-1.94	1.27	-2.38	1.25	-1.80	1.11	-0.47	0.85	-0.70	0.82	-1.39	0.88	-0.53	0.70	0.03	0.45
b2771	JW5845	gene2826	ygcS	7.33	1.67	0.23	0.71	-1.90	0.49	-4.04	1.38	-1.15	0.87	-0.97	0.72	-1.67	0.84	-1.12	0.67	-0.72	0.65	-0.32	0.57	-0.27	0.42
b4463	JW5442	gene2827	ygcU	21.67	2.40	-0.06	0.54	-2.32	0.29	-2.34	0.58	-1.23	0.46	-1.01	0.44	-0.67	0.41	-0.52	0.38	-1.18	0.44	-0.82	0.39	-0.26	0.33
b2774	JW5443	gene2828	ygcW	1.67	0.67	-0.68	0.71	-1.32	0.91	-1.12	1.55	-0.29	1.28	0.02	1.19	1.44	0.89	0.17	0.98	-1.85	0.99	-0.76	0.80	-0.21	0.51
b2775	JW2746	gene2829	yqcE	4.00	2.52	-0.31	0.80	-1.56	0.75	-1.56	1.24	-0.17	1.09	0.30	0.84	0.89	0.83	1.02	0.67	-0.35	0.82	-1.11	0.76	-0.89	0.50
b0278	JW0272	gene283	yagL	2.33	0.67	0.49	0.80	3.42	0.56	1.12	0.93	1.98	0.77	1.04	0.88	1.15	0.80	0.59	0.84	0.39	0.84	-1.07	0.80	-0.08	0.49
b2776	JW5444	gene2830	ygcE	7.33	1.86	-0.06	0.70	0.62	0.40	0.02	0.66	0.25	0.70	0.85	0.54	1.55	0.48	1.38	0.47	0.48	0.54	0.07	0.55	0.09	0.37
b2777	JW2748	gene2831	queE	112.67	24.55	-0.09	0.30	0.49	0.13	0.08	0.19	-0.06	0.40	-0.39	0.21	-0.70	0.25	0.24	0.19	0.08	0.25	-0.10	0.19	0.25	0.18
b4682	Null	gene2832	yqcG	0.00	0.00	NA	NA	0.42	2.35	NA	NA	2.37	2.07	NA	NA	NA	NA	NA	NA	NA	NA	0.30	0.49	0.12	0.25
b2778	JW5445	gene2833	ygcG	1.67	1.20	-0.10	0.72	1.70	0.72	0.22	1.35	0.10	1.23	0.48	1.19	0.51	1.26	-1.55	1.22	-0.20	0.97	-0.08	0.79	-0.11	0.51
b2779	JW2750	gene2834	eno	25753.33	4050.27	-1.41	0.29	-1.25	0.10	-0.86	0.10	-0.94	0.19	-0.72	0.15	0.07	0.25	-1.70	0.13	-1.19	0.19	-1.13	0.12	-0.87	0.15
b2780	JW2751	gene2835	pyrG	4098.00	661.31	-0.35	0.25	0.90	0.07	0.85	0.09	0.06	0.43	-0.49	0.13	-0.26	0.29	-1.37	0.11	-1.06	0.15	-0.90	0.10	-0.50	0.12
b2781	JW2752	gene2836	mazG	301.33	40.29	-0.64	0.34	-0.76	0.12	-1.72	0.19	-1.54	0.25	-1.73	0.20	-1.26	0.23	-0.11	0.16	-0.30	0.19	-0.52	0.15	-0.24	0.17
b2782	JW2753	gene2837	mazF	19.33	5.81	0.58	0.54	1.59	0.24	0.34	0.42	0.62	0.48	0.52	0.41	0.59	0.43	0.98	0.35	0.60	0.40	0.03	0.39	0.04	0.33
b2783	JW2754	gene2838	mazE	20.00	3.21	0.17	0.54	0.89	0.24	-0.08	0.42	0.83	0.38	0.31	0.38	0.82	0.35	1.02	0.33	0.50	0.37	0.07	0.36	0.26	0.30
b2784	JW2755	gene2839	relA	410.00	80.73	-0.15	0.27	-0.13	0.10	-0.24	0.16	-0.23	0.22	-0.25	0.16	0.21	0.19	0.50	0.14	0.23	0.20	-0.11	0.14	-0.02	0.14
b0279	JW0273	gene284	yagM	1.00	0.58	-0.01	0.71	2.58	0.84	0.72	1.39	2.28	1.02	1.83	1.11	0.84	1.19	0.56	1.06	-0.23	0.99	0.61	0.79	0.14	0.50
b2785	JW2756	gene2840	rlmD	136.67	25.72	-0.48	0.37	0.35	0.12	0.30	0.19	0.01	0.33	-0.17	0.21	0.29	0.21	0.41	0.17	0.37	0.20	0.11	0.17	0.04	0.16
b2786	JW2757	gene2841	barA	175.00	31.50	-0.46	0.30	1.13	0.10	0.68	0.15	0.30	0.28	0.25	0.18	0.75	0.22	-0.13	0.17	-0.17	0.19	0.04	0.15	-0.37	0.19
b2787	JW2758	gene2842	gudD	44.67	6.74	-0.14	0.42	-2.04	0.20	-2.05	0.40	-1.75	0.39	-0.09	0.28	0.42	0.30	0.98	0.24	0.50	0.27	-0.01	0.26	0.06	0.22
b2788	JW2759	gene2843	gudX	17.33	2.33	0.62	0.51	-1.55	0.30	-2.79	0.71	-1.70	0.56	-0.67	0.46	-0.66	0.47	0.24	0.41	-0.22	0.43	-0.22	0.39	0.04	0.28
b2789	JW2760	gene2844	gudP	10.00	1.15	0.57	0.68	-1.10	0.40	-2.00	0.78	-2.07	0.75	0.57	0.49	1.27	0.46	1.57	0.45	0.28	0.51	-0.21	0.49	0.11	0.34
b2790	JW2761	gene2845	yqcA	105.67	14.08	-1.07	0.35	0.77	0.12	0.69	0.18	0.82	0.23	0.90	0.20	0.89	0.22	1.41	0.18	0.71	0.22	0.28	0.18	0.23	0.20
b2791	JW2762	gene2846	truC	42.00	4.04	0.65	0.42	2.60	0.16	2.10	0.21	1.45	0.50	0.69	0.28	0.45	0.34	-1.63	0.33	-0.29	0.34	0.22	0.26	0.30	0.21
b2792	JW2763	gene2847	yqcC	19.00	1.73	0.58	0.55	2.17	0.23	1.87	0.31	1.60	0.45	0.67	0.37	0.86	0.35	-0.62	0.41	-0.28	0.44	0.53	0.34	0.72	0.28
b2793	JW2764	gene2849	syd	63.33	11.17	1.31	0.36	1.35	0.16	0.87	0.22	0.88	0.27	0.26	0.24	0.42	0.27	0.15	0.23	-0.06	0.30	-0.04	0.23	0.15	0.19
b0280	JW0274	gene285	yagN	79.00	20.13	1.67	0.36	0.65	0.19	0.31	0.25	1.43	0.44	1.23	0.24	1.74	0.28	0.82	0.23	0.24	0.36	0.30	0.22	0.29	0.26
b2794	JW2765	gene2850	queF	199.00	35.13	0.14	0.30	1.28	0.15	0.58	0.17	0.39	0.27	-0.03	0.20	-0.20	0.26	-0.59	0.19	-0.73	0.22	-0.46	0.17	-0.31	0.20
-	-	gene2851	ygdH	384.00	66.09	0.02	0.29	-0.31	0.09	0.02	0.13	1.20	0.48	1.39	0.15	1.52	0.27	2.09	0.14	1.96	0.16	1.54	0.11	0.69	0.26
b2796	JW2767	gene2852	sdaC	1518.00	255.11	-1.20	0.19	1.77	0.08	2.34	0.09	2.86	0.43	2.20	0.13	0.72	0.36	-3.41	0.14	-2.76	0.28	-0.41	0.12	-0.55	0.16
b2797	JW2768	gene2853	sdaB	388.67	63.89	0.06	0.21	2.82	0.09	2.84	0.11	3.33	0.43	2.60	0.20	1.31	0.33	-3.47	0.21	-2.65	0.28	-0.63	0.14	-0.53	0.14
b2798	JW5446	gene2854	ygdG	23.67	3.18	1.04	0.45	1.60	0.23	1.49	0.30	1.18	0.35	1.28	0.31	1.17	0.33	1.13	0.30	0.80	0.35	0.57	0.31	0.21	0.26
b2799	JW2770	gene2855	fucO	113.00	25.42	-0.08	0.32	-4.06	0.19	-3.39	0.34	-0.43	0.73	0.33	0.21	1.30	0.23	2.75	0.18	1.47	0.28	0.62	0.17	-0.07	0.30
b2800	JW2771	gene2856	fucA	18.00	2.31	-0.62	0.59	-2.61	0.35	-3.95	0.91	-0.40	0.68	0.36	0.39	0.72	0.37	1.83	0.32	0.73	0.40	0.14	0.37	-0.55	0.31
b2801	JW2772	gene2857	fucP	8.67	3.18	-0.39	0.74	-2.20	0.50	-1.71	0.86	1.34	1.05	1.75	0.45	2.39	0.43	1.47	0.44	0.63	0.51	-0.34	0.55	-0.64	0.41
b2802	JW2773	gene2858	fucI	73.33	11.86	-0.32	0.36	-2.60	0.19	-1.79	0.31	0.53	0.67	1.62	0.21	2.54	0.24	0.57	0.22	-0.21	0.25	-0.46	0.23	-0.88	0.22
b2803	JW2774	gene2859	fucK	48.33	10.27	-1.08	0.48	-1.93	0.24	-1.93	0.39	0.41	0.65	0.80	0.26	1.50	0.28	0.81	0.25	-0.28	0.30	-0.63	0.28	-0.59	0.24
b0281	JW0275	gene286	intF	288.67	67.34	-0.99	0.40	-0.17	0.18	-0.04	0.18	0.22	0.33	0.24	0.21	-0.06	0.26	0.52	0.18	0.32	0.22	0.29	0.16	0.05	0.21
b2804	JW2775	gene2860	fucU	55.33	2.73	-0.58	0.47	-2.07	0.20	-1.92	0.37	-0.67	0.41	0.02	0.27	0.82	0.27	1.40	0.22	1.12	0.26	0.28	0.24	0.09	0.21
b2805	JW2776	gene2861	fucR	164.33	33.71	-0.59	0.34	-2.45	0.15	-2.34	0.24	0.20	0.76	0.30	0.19	0.65	0.21	0.75	0.18	0.37	0.22	0.48	0.16	-0.10	0.25
b2806	JW2777	gene2862	rlmM	225.33	37.62	0.00	0.30	1.67	0.09	1.06	0.13	0.38	0.41	-0.53	0.17	-1.05	0.20	-0.39	0.16	-0.45	0.19	-0.27	0.15	-0.16	0.14
[truncated: 2,315 more rows]
